# Supplementary material
Source: publisher site journal article supplement (https://www.spandidos-publications.com/2008/downloadSupplementary)
Supplement: Supplementary file 2 [file downloadSupplementary]

## Sheet: Sheet1
Table SIII: Total peptides expressed in between the IgAN group and the other glomerular disease group
Peptide	m/z	Quality	Significance	Avg. ppm	Theoretical pI	Accession	PTM	HPSN 102	HPSN 104	HPSN 110	HPSN 111	HPSN 2	HPSN 80	LN 123	LN 21	LN 218	LN 59	LN 60	LN 61	MCD 19	MCD 27	MCD 30	MCD 35	MCD 39	MCD 40	IgAN 1	IgAN 124	IgAN 13	IgAN 139	IgAN 15	IgAN 16	IgAN 171	IgAN 193	IgAN 194	IgAN 28	IgAN 32	IgAN 33	IgAN 358	IgAN 360	IgAN 4	IgAN 43	IgAN 85
LRPVR	640.431	0.01	3.93	0	12			0	0	0	0	0	0	0	0	0	0	0	0	0	0	0	0	0	0	0	0	0	0	0	0	0	0	0	54.7	0	0	0	0	0	0	0
TETLNNVLSGN	581.296	0.01	5.1	0	4			0	0	0	0	0	0	0	0	0	0	0	0	0	0	0	0	0	0	66.6	0	0	0	0	0	0	0	0	0	0	0	0	0	0	0	0
TSQ(+.98)ECSDT	871.293	0.01	5.27	0	3.67		Deamidation (NQ)	0	0	0	0	0	0	0	0	0	0	0	0	0	0	0	0	0	0	0	0	0	0	0	0	0	0	0	0	68.7	0	0	0	0	0	0
ISGHN(+.98)IVQPT	533.78	0.02	60	0.5	6.74		Deamidation (NQ)	0	0	0	0	0	0	0	0	0	0	0	0	0	0	0	0	0	0	0	0	0	0	0	69.5	0	0	0	0	0	0	0	0	0	0	0
TAGKQ	504.275	0.01	6.39	0	8.41			0	0	0	0	0	0	0	0	0	0	0	0	0	0	0	0	0	0	0	0	0	0	0	0	0	78.7	0	0	0	0	0	0	0	0	0
KGDGCT	580.236	0.01	11.3	0	5.83			0	0	0	0	0	0	0	0	0	0	0	0	0	0	0	0	0	0	0	118	0	0	0	0	0	0	0	0	0	0	0	0	0	0	0
PLPPT	524.299	0.01	12.38	0	5.96	sp|Q8N3K9|CMYA5_HUMAN		0	0	0	0	0	0	0	0	0	0	0	0	0	0	0	0	0	0	0	0	0	0	0	0	0	0	0	0	0	123	0	0	0	0	0
ILPKK	598.427	0.01	60	6.8	10			0	0	0	0	0	0	0	0	0	0	0	0	0	0	0	0	0	0	0	143	0	0	0	0	0	0	0	0	0	0	0	0	0	0	0
DEKSIPLIWGAVL	720.905	0.01	17.59	0	4.37			0	0	0	0	0	0	0	0	0	0	0	0	0	0	0	0	0	0	0	0	0	0	0	0	0	0	0	0	0	0	0	0	156	0	0
QFQPGVWHDHSKY	407.945	0.01	22.87	0	6.92			0	0	0	0	0	0	0	0	0	0	0	0	0	0	0	0	0	0	0	0	0	0	183	0	0	0	0	0	0	0	0	0	0	0	0
Q(-17.03)GGGSEP	614.234	0.01	25.26	0	4		Pyro-glu from Q	0	0	0	0	0	0	0	0	0	0	0	0	0	0	0	0	0	0	0	0	0	0	0	0	0	0	0	0	0	0	0	0	0	196	0
PCPGSP	557.229	0.01	27	0	5.91			0	0	0	0	0	0	0	0	0	0	0	0	0	0	0	0	0	0	0	202	0	0	0	0	0	0	0	0	0	0	0	0	0	0	0
E(-18.01)TVPATQTQ(+.98)T	529.754	0.01	60	11.5	4		Pyro-glu from E; Deamidation (NQ)	0	0	0	0	0	0	0	0	0	0	0	0	0	0	0	0	0	0	0	0	0	0	214	0	0	0	0	0	0	0	0	0	0	0	0
KITHRIHWESA	459.918	0.01	33.71	0	8.76	sp|P01024|CO3_HUMAN		0	0	0	0	0	0	0	0	0	0	0	0	0	0	0	0	0	0	0	233	0	0	0	0	0	0	0	0	0	0	0	0	0	0	0
VNPECDDQEDCSDGSDEAH	1032.85	0.01	34.61	0	3.54			0	0	0	0	0	0	0	0	0	0	0	0	0	0	0	0	0	0	0	0	0	233	0	0	0	0	0	0	0	0	0	0	0	0	0
LLLLLLR	853.63	0.01	37.45	0	9.75			0	0	0	0	0	0	0	0	0	0	0	0	0	0	0	0	0	0	0	0	0	0	0	0	248	0	0	0	0	0	0	0	0	0	0
ALGPASST	703.358	0.01	60	0.9	5.57			0	0	0	0	0	0	0	0	0	0	0	0	0	0	0	0	0	0	0	0	0	0	0	0	0	0	0	0	0	0	0	0	255	0	0
PGSAH	468.221	0.01	44.83	0	7.17			0	0	0	0	0	0	0	0	0	0	0	0	0	0	0	0	0	0	0	0	0	277	0	0	0	0	0	0	0	0	0	0	0	0	0
AFADM	554.229	0.01	60	18	3.8			0	0	0	0	0	0	0	0	0	0	0	0	0	0	0	0	0	0	0	0	0	314	0	0	0	0	0	0	0	0	0	0	0	0	0
FPEAEALSPEQ(+.98)AAH	749.339	0.01	60	0	4.24		Deamidation (NQ)	0	0	0	0	0	0	0	0	0	0	0	0	0	0	0	0	0	0	0	0	0	0	0	0	0	0	0	0	0	0	0	0	324	0	0
QQQQGLGLQ	500.264	0.01	60	0	5.52			0	0	0	0	0	0	0	0	0	0	0	0	0	0	0	0	0	0	0	0	0	0	0	0	0	0	0	339	0	0	0	0	0	0	0
AVSAADSANGSVGAATAPAGLP	618.972	0.01	60	3.8	3.8			0	0	0	0	0	0	0	0	0	0	0	0	0	0	0	0	0	0	0	0	0	0	0	0	0	0	0	356	0	0	0	0	0	0	0
PM(+15.99)ASCLST	413.182	0.01	60	16.5	5.91		Oxidation (M)	0	0	0	0	0	0	0	0	0	0	0	0	0	0	0	0	0	0	364	0	0	0	0	0	0	0	0	0	0	0	0	0	0	0	0
NAGDGGGV	646.269	0.01	60	0	3.8			0	0	0	0	0	0	0	0	0	0	0	0	0	0	0	0	0	0	0	0	0	370	0	0	0	0	0	0	0	0	0	0	0	0	0
KEGPGGK	672.368	0.01	60	0	8.59			0	0	0	0	0	0	0	0	0	0	0	0	0	0	0	0	0	0	0	0	0	0	0	0	0	0	0	372	0	0	0	0	0	0	0
KSGVT	491.266	0.02	60	17.3	8.75			0	0	0	0	0	0	0	0	0	0	0	0	0	0	0	0	0	0	0	0	0	0	0	0	0	0	0	0	0	0	0	0	388	0	0
GTPPGG	485.234	0.01	60	0	5.52			0	0	0	0	0	0	0	0	0	0	0	0	0	0	0	0	0	0	0	0	0	0	0	0	0	391	0	0	0	0	0	0	0	0	0
TVDEEVDENSSGM	471.188	0.01	60	0	3.39			0	0	0	0	0	0	0	0	0	0	0	0	0	0	0	0	0	0	394	0	0	0	0	0	0	0	0	0	0	0	0	0	0	0	0
KEHVAK	356.211	0.01	60	0	8.6			0	0	0	0	0	0	0	0	0	0	0	0	0	0	0	0	0	0	0	0	0	439	0	0	0	0	0	0	0	0	0	0	0	0	0
GACGEAM(+15.99)	654.219	0.01	60	0	4		Oxidation (M)	0	0	0	0	0	0	0	0	0	0	0	0	0	0	0	0	0	0	0	0	0	0	0	0	0	0	0	0	0	0	0	0	464	0	0
N(+.98)GFKSHALQ(+.98)LNNRQIR	633.346	0.01	60	12.7	12.01		Deamidation (NQ)	0	0	0	0	0	0	0	0	0	0	0	0	0	0	0	0	0	0	0	0	0	0	477	0	0	0	0	0	0	0	0	0	0	0	0
NAGKA	460.251	0.01	60	0	8.75			0	0	0	0	0	0	0	0	0	0	0	0	0	0	0	0	0	0	0	0	0	0	0	0	0	0	0	0	0	0	0	0	477	0	0
QNSAN(+.98)PSPSG	480.205	0.12	60	2.2	5.52		Deamidation (NQ)	0	0	0	0	0	0	0	0	0	0	0	0	0	0	0	0	0	0	0	0	0	0	0	0	0	0	0	0	483	0	0	0	0	0	0
RVLLVV	698.499	0.01	60	0	9.75			0	0	0	0	0	0	0	0	0	0	0	0	0	0	0	0	0	0	0	0	0	0	0	0	0	0	488	0	0	0	0	0	0	0	0
ASPGRGSHGQ(+.98)T	528.24	0.01	60	0	9.8		Deamidation (NQ)	0	0	0	0	0	0	0	0	0	0	0	0	0	0	0	0	0	0	0	0	500	0	0	0	0	0	0	0	0	0	0	0	0	0	0
E(-18.01)CSPGSQ(+.98)PPSP	1068.43	0.01	60	0	4		Pyro-glu from E; Deamidation (NQ)	0	0	0	0	0	0	0	0	0	0	0	0	0	0	0	0	0	0	0	0	0	0	0	0	0	0	0	0	0	0	0	0	545	0	0
CGSGCCGP	683.181	0.01	60	0	5.5	sp|Q9BYP8|KR171_HUMAN		0	0	0	0	0	0	0	0	0	0	0	0	0	0	0	0	0	0	546	0	0	0	0	0	0	0	0	0	0	0	0	0	0	0	0
TILTGLQSHRVN(+.98)N(+.98)AFLF	967.027	0.01	60	0	9.44		Deamidation (NQ)	0	0	0	0	0	0	0	0	0	0	0	0	0	0	0	0	0	0	0	0	0	0	0	0	0	0	0	0	0	0	0	0	562	0	0
MLDLQSPSQQ(+.98)STVLRGLPPGTQIQIKVQAQGQ	1149.96	0.01	60	4.9	8.5		Deamidation (NQ)	0	0	0	0	0	0	0	0	0	0	0	0	0	0	0	0	0	0	0	0	0	0	0	0	0	0	0	0	0	0	297	269	0	0	0
HGLGHGHEQQHGLGHGHKF	414.804	0.01	60	0	7.21			0	0	0	0	0	0	0	0	0	0	0	0	0	0	0	0	0	0	0	0	0	0	0	0	0	0	0	0	0	0	0	0	0	612	0
VKGPP	497.296	0.02	60	1.6	8.72			0	0	0	0	0	0	0	0	0	0	0	0	0	0	0	0	0	0	0	0	0	0	0	646	0	0	0	0	0	0	0	0	0	0	0
PGPAGGAP	623.321	0.01	60	0	5.96			0	0	0	0	0	0	0	0	0	0	0	0	0	0	0	0	0	0	0	0	0	0	0	0	0	0	0	0	0	0	0	0	675	0	0
KTKEQVTNVGGAVVTG	529.962	0.01	60	0	8.59			0	0	0	0	0	0	0	0	0	0	0	0	0	0	0	0	0	0	0	0	0	0	0	0	0	0	0	0	0	0	0	0	698	0	0
YALLALLQ	452.78	0.01	60	0	5.52	sp|P01024|CO3_HUMAN		0	0	0	0	0	0	0	0	0	0	0	0	0	0	0	0	0	0	0	0	0	0	0	0	0	0	0	702	0	0	0	0	0	0	0
FFNGTEIAH	518.244	0.01	60	17.6	5.24			0	0	0	0	0	0	0	0	0	0	0	0	0	0	0	0	0	0	0	0	310	0	423	0	0	0	0	0	0	0	0	0	0	0	0
HVQPQPQPKPQVQL	541.971	0.02	60	0.5	8.76	sp|Q15942|ZYX_HUMAN		0	0	0	0	0	0	0	0	0	0	0	0	0	0	0	0	0	0	0	0	0	0	0	0	0	0	0	0	0	758	0	0	0	0	0
NALVMFNG	433.206	0.13	60	6	5.52	sp|Q5T3J3|LRIF1_HUMAN		0	0	0	0	0	0	0	0	0	0	0	0	0	0	0	0	0	0	0	0	0	0	0	0	0	0	0	0	0	0	0	0	762	0	0
S(+42.01)DKPDMAEIEKFDKSKLK	431.026	0.1	60	1.9	5.97	sp|P62328|TYB4_HUMAN	Acetylation (Protein N-term)	0	0	0	0	0	0	0	0	0	0	0	0	0	0	0	0	0	0	0	0	0	0	0	763	0	0	0	0	0	0	0	0	0	0	0
KTKEGVLYVGSKTKEGVVH	515.545	0.01	60	0	9.4			0	0	0	0	0	0	0	0	0	0	0	0	0	0	0	0	0	0	0	0	0	0	0	0	0	0	0	0	0	0	0	0	792	0	0
GPRPALNNNL	533.305	0.01	60	15.6	9.75			0	0	0	0	0	0	0	0	0	0	0	0	0	0	0	0	0	0	0	0	0	0	799	0	0	0	0	0	0	0	0	0	0	0	0
QGILQGLH	433.252	0.01	60	0	6.74			0	0	0	0	0	0	0	0	0	0	0	0	0	0	0	0	0	0	0	0	0	801	0	0	0	0	0	0	0	0	0	0	0	0	0
N(+.98)GFKSHALQLNNR	500.595	0.12	60	3.9	11		Deamidation (NQ)	0	0	0	0	0	0	0	0	0	0	0	0	0	0	0	0	0	0	0	0	0	0	0	0	0	0	0	0	823	0	0	0	0	0	0
TLPRMKSSSSVTT	465.581	0.01	60	0	11			0	0	0	0	0	0	0	0	0	0	0	0	0	0	0	0	0	0	0	0	0	0	0	0	0	0	0	0	0	0	0	0	833	0	0
QECCC	585.139	0.01	60	0.9	4			0	0	0	0	0	0	0	0	0	0	0	0	0	0	0	0	0	0	0	0	0	0	0	0	0	0	624	0	0	0	0	0	211	0	0
QTEPQ(+.98)ALLA	486.246	0.01	60	0.6	4		Deamidation (NQ)	0	0	0	0	0	0	0	0	0	0	0	0	0	0	0	0	0	0	0	0	842	0	0	0	0	0	0	0	0	0	0	0	0	0	0
S(+42.01)AM(+15.99)NNAGNA	907.354	0.01	60	0	5.24		Acetylation (Protein N-term); Oxidation (M)	0	0	0	0	0	0	0	0	0	0	0	0	0	0	0	0	0	0	0	0	0	0	0	0	0	0	0	0	0	0	0	0	858	0	0
NDNEEGFFSARGH	493.878	0.06	60	5.3	4.65	sp|P02675|FIBB_HUMAN		0	0	0	0	0	0	0	0	0	0	0	0	0	0	0	0	0	0	0	0	0	0	0	0	899	0	0	0	0	0	0	0	0	0	0
E(-18.01)HN(+.98)STMLESDLGTM(+15.99)VINSEDEEEEDGTMK	654.654	0.01	60	0	3.8		Pyro-glu from E; Deamidation (NQ); Oxidation (M)	0	0	0	0	0	0	0	0	0	0	0	0	0	0	0	0	0	0	0	902	0	0	0	0	0	0	0	0	0	0	0	0	0	0	0
QTAPNK	658.351	0.02	60	18.2	8.75			0	0	0	0	0	0	0	0	0	0	0	0	0	0	0	0	0	0	0	0	0	0	0	0	0	0	0	0	519	0	408	0	0	0	0
GHGLGHGHEQQHGLGHGHKF	426.209	0.03	60	3.6	7.21			0	0	0	0	0	0	0	0	0	0	0	0	0	0	0	0	0	0	0	0	0	0	0	0	0	0	0	0	0	0	0	0	0	933	0
DSHSLTTNIMEIL	737.375	0.01	60	0	4.35	sp|P02671|FIBA_HUMAN		0	0	0	0	0	0	0	0	0	0	0	0	0	0	0	0	0	0	940	0	0	0	0	0	0	0	0	0	0	0	0	0	0	0	0
Q(+.98)HECSAGSSQDHPPPGA	569.25	0.01	60	7.5	5.15		Deamidation (NQ)	0	0	0	0	0	0	0	0	0	0	0	0	0	0	0	0	0	0	0	0	0	0	0	944	0	0	0	0	0	0	0	0	0	0	0
RAGCGAQ(+.98)IFF	1070.53	0.01	60	0	8.25		Deamidation (NQ)	0	0	0	0	0	0	0	0	0	0	0	0	0	0	0	0	0	0	1010	0	0	0	0	0	0	0	0	0	0	0	0	0	0	0	0
SRPGGRASVDTKEAEGAPQVEAGKRLE	559.891	0.02	60	0	6.04			0	0	0	0	0	0	0	0	0	0	0	0	0	0	0	0	0	0	0	0	0	0	0	0	0	0	0	548	491	0	0	0	0	0	0
PQSFPNAGIPQ(+.98)ES	458.214	0.01	60	0	4		Deamidation (NQ)	0	0	0	0	0	0	0	0	0	0	0	0	0	0	0	0	0	0	0	0	0	0	0	0	0	0	0	0	0	1060	0	0	0	0	0
ALTDMPQMR	531.766	0.03	60	11.5	5.88	sp|P02671|FIBA_HUMAN		0	0	0	0	0	0	0	0	0	0	0	0	0	0	0	0	0	0	0	0	0	0	0	0	0	0	0	0	0	0	0	0	0	1090	0
N(+.98)QGKKGEGAQN(+.98)QGK	482.563	0.04	60	2.1	9.7		Deamidation (NQ)	0	0	0	0	0	0	0	0	0	0	0	0	0	0	0	0	0	0	833	0	258	0	0	0	0	0	0	0	0	0	0	0	0	0	0
Q(+42.01)PAGGP	568.265	0.01	60	0	5.52		Acetylation (Protein N-term)	0	0	0	0	0	0	0	0	0	0	0	0	0	0	0	0	0	0	0	0	0	0	0	0	0	0	0	0	0	0	0	0	0	0	1110
APWKEKSQ	973.518	0.01	60	0	8.64			0	0	0	0	0	0	0	0	0	0	0	0	0	0	0	0	0	0	0	0	1120	0	0	0	0	0	0	0	0	0	0	0	0	0	0
KQFTSSTSYNRGDST	560.258	0.01	60	0	8.59	sp|P02671|FIBA_HUMAN		0	0	0	0	0	0	0	0	0	0	0	0	0	0	0	0	0	0	1120	0	0	0	0	0	0	0	0	0	0	0	0	0	0	0	0
DGECEDVDECAMGTH	805.767	0.01	60	0	3.71			0	0	0	0	0	0	0	0	0	0	0	0	0	0	0	0	0	0	0	1120	0	0	0	0	0	0	0	0	0	0	0	0	0	0	0
FLLDALSEDFSGPQ(+.98)N(+.98)A	575.928	0.02	60	4.5	3.49		Deamidation (NQ)	0	0	0	0	0	0	0	0	0	0	0	0	0	0	0	0	0	0	0	0	0	0	0	0	0	0	0	0	0	747	0	0	378	0	0
PCDTF	582.229	0.01	60	0	3.8			0	0	0	0	0	0	0	0	0	0	0	0	0	0	0	0	0	0	1130	0	0	0	0	0	0	0	0	0	0	0	0	0	0	0	0
SVGAAICGLQQ	523.772	0.03	60	0.2	5.24			0	0	0	0	0	0	0	0	0	0	0	0	0	0	0	0	0	0	695	0	0	0	0	0	0	0	0	0	0	0	0	0	441	0	0
SSNETDSFSESPC	695.257	0.01	60	0	3.57			0	0	0	0	0	0	0	0	0	0	0	0	0	0	0	0	0	0	0	0	1140	0	0	0	0	0	0	0	0	0	0	0	0	0	0
ENLRLKQQSELQ	495.936	0.01	60	0	6.24			0	0	0	0	0	0	0	0	0	0	0	0	0	0	0	0	0	0	0	0	0	0	0	0	0	0	0	0	0	1150	0	0	0	0	0
DISPVQ(+.98)TDALDSVRE	549.268	0.01	60	0	3.84		Deamidation (NQ)	0	0	0	0	0	0	0	0	0	0	0	0	0	0	0	0	0	0	0	0	0	0	0	0	0	0	0	1150	0	0	0	0	0	0	0
TQ(+.98)ECQ(+.98)DINECEQPGVCSGGQCT	583.456	0.01	60	2.9	3.5		Deamidation (NQ)	0	0	0	0	0	0	0	0	0	0	0	0	0	0	0	0	0	0	0	331	0	0	0	0	0	679	0	0	0	0	0	0	151	0	0
PLPSKETIEQEKQAGES	624.311	0.01	60	2.8	4.49	sp|P62328|TYB4_HUMAN		0	0	0	0	0	0	0	0	0	0	0	0	0	0	0	0	0	0	0	0	0	0	1170	0	0	0	0	0	0	0	0	0	0	0	0
CTKIAKVEK	510.304	0.01	60	8.5	9.2			0	0	0	0	0	0	0	0	0	0	0	0	0	0	0	0	0	0	0	0	0	0	0	0	0	865	0	0	0	0	0	0	339	0	0
ATYLEAQN(+.98)GTRDDS	514.561	0.01	60	0	4.03		Deamidation (NQ)	0	0	0	0	0	0	0	0	0	0	0	0	0	0	0	0	0	0	0	0	0	0	0	0	0	0	1220	0	0	0	0	0	0	0	0
KRNQCLKKMIHVFN(+.98)Q(+.98)LKK	753.429	0.01	60	0	10.6		Deamidation (NQ)	0	0	0	0	0	0	0	0	0	0	0	0	0	0	0	0	0	0	0	0	0	0	0	0	0	0	0	0	0	1220	0	0	0	0	0
QGSCT	495.184	0.01	60	0	5.52			0	0	0	0	0	0	0	0	0	0	0	0	0	0	0	0	0	0	1240	0	0	0	0	0	0	0	0	0	0	0	0	0	0	0	0
Q(-17.03)MPNDQEEESFAEGHSE	973.868	0.01	60	0	3.83		Pyro-glu from Q	0	0	0	0	0	0	0	0	0	0	0	0	0	0	0	0	0	0	0	0	0	0	0	0	0	0	1250	0	0	0	0	0	0	0	0
GTTGSLAEVTGT	547.276	0.01	60	0	4			0	0	0	0	0	0	0	0	0	0	0	0	0	0	0	0	0	0	0	0	0	0	0	0	1260	0	0	0	0	0	0	0	0	0	0
SREKSSQ(+.98)ESGEETGSQEN(+.98)HPQ(+.98)	1167.47	0.01	60	0	4.64		Deamidation (NQ)	0	0	0	0	0	0	0	0	0	0	0	0	0	0	0	0	0	0	0	0	0	0	0	0	0	0	0	0	0	0	0	0	1260	0	0
ELGHGADTQ(+.98)SSESP	472.527	0.01	60	0	4.13		Deamidation (NQ)	0	0	0	0	0	0	0	0	0	0	0	0	0	0	0	0	0	0	0	0	0	0	1270	0	0	0	0	0	0	0	0	0	0	0	0
TKKLIIDVI	521.849	0.01	60	0	8.26			0	0	0	0	0	0	0	0	0	0	0	0	0	0	0	0	0	0	0	0	0	0	0	1290	0	0	0	0	0	0	0	0	0	0	0
VEVTG	504.264	0.01	60	0	4	sp|O60291|MGRN1_HUMAN		0	0	0	0	0	0	0	0	0	0	0	0	0	0	0	0	0	0	0	0	0	0	0	0	0	0	0	0	1300	0	0	0	0	0	0
IGISLAIWLLILLVT	546.696	0.01	60	0	5.52			0	0	0	0	0	0	0	0	0	0	0	0	0	0	0	0	0	0	0	0	0	0	0	1320	0	0	0	0	0	0	0	0	0	0	0
E(-18.01)EGGPT	571.239	0.01	60	0	3.8		Pyro-glu from E	0	0	0	0	0	0	0	0	0	0	0	0	0	0	0	0	0	0	1370	0	0	0	0	0	0	0	0	0	0	0	0	0	0	0	0
EPSLALFAPS	516.261	0.01	60	2.8	4			0	0	0	0	0	0	0	0	0	0	0	0	0	0	0	0	0	0	0	0	0	0	0	1380	0	0	0	0	0	0	0	0	0	0	0
Q(-17.03)CCPDCT	752.195	0.01	60	11.2	3.8		Pyro-glu from Q	0	0	0	0	0	0	0	0	0	0	0	0	0	0	0	0	0	0	1330	0	0	0	0	0	0	0	0	53.5	0	0	0	0	0	0	0
ASPPRQAGWSSQ	424.535	0.04	60	0.9	9.79			0	0	0	0	0	0	0	0	0	0	0	0	0	0	0	0	0	0	984	0	0	0	0	0	0	0	0	0	0	0	0	0	179	229	0
ATTRGSAKQ	460.252	0.02	60	4.1	11			0	0	0	0	0	0	0	0	0	0	0	0	0	0	0	0	0	0	1400	0	0	0	0	0	0	0	0	0	0	0	0	0	0	0	0
CCPQ(+.98)EATM(+15.99)Q(+.98)E	386.469	0.01	60	0	3.79		Deamidation (NQ); Oxidation (M)	0	0	0	0	0	0	0	0	0	0	0	0	0	0	0	0	0	0	0	1400	0	0	0	0	0	0	0	0	0	0	0	0	0	0	0
NPVCGP	586.263	0.01	60	0	5.52			0	0	0	0	0	0	0	0	0	0	0	0	0	0	0	0	0	0	1410	0	0	0	0	0	0	0	0	0	0	0	0	0	0	0	0
DEAGSEADHEGTHSTKRGHA	419.188	0.02	60	0.4	5.29	sp|P02671|FIBA_HUMAN		0	0	0	0	0	0	0	0	0	0	0	0	0	0	0	0	0	0	406	0	641	0	0	369	0	0	0	0	0	0	0	0	0	0	0
LQLGVQLLPKKLVVHIRGKQ(+.98)P	1183.24	0.01	60	0	11.26		Deamidation (NQ)	0	0	0	0	0	0	0	0	0	0	0	0	0	0	0	0	0	0	0	0	0	1420	0	0	0	0	0	0	0	0	0	0	0	0	0
PMACHEGGVGVG	1113.47	0.01	60	0.7	5.25			0	0	0	0	0	0	0	0	0	0	0	0	0	0	0	0	0	0	186	0	0	1240	0	0	0	0	0	0	0	0	0	0	0	0	0
GELLSLRYDLT	640.352	0.02	60	12.8	4.37	sp|P49590|SYHM_HUMAN		0	0	0	0	0	0	0	0	0	0	0	0	0	0	0	0	0	0	0	0	0	409	0	0	0	0	0	1020	0	0	0	0	0	0	0
VKCKNCGAFGHSA	441.204	0.01	60	0	8.9			0	0	0	0	0	0	0	0	0	0	0	0	0	0	0	0	0	0	0	0	0	0	0	0	0	0	0	0	0	0	0	0	0	0	1460
VAAALALD	743.433	0.02	60	3	3.8	sp|Q96HH4|TM169_HUMAN		0	0	0	0	0	0	0	0	0	0	0	0	0	0	0	0	0	0	0	0	0	0	746	0	0	0	0	0	746	0	0	0	0	0	0
YVRGN(+.98)DLELDSSDDWQTYHNEM(+15.99)C	936.375	0.01	60	0	3.96		Deamidation (NQ); Oxidation (M)	0	0	0	0	0	0	0	0	0	0	0	0	0	0	0	0	0	0	0	0	0	0	0	0	0	0	0	0	0	0	0	0	1500	0	0
EENDDDDDDDDEEDGVFDDEDEEEENIESKVTKPVQ	1051.15	0.01	60	0	3.33			0	0	0	0	0	0	0	0	0	0	0	0	0	0	0	0	0	0	0	1550	0	0	0	0	0	0	0	0	0	0	0	0	0	0	0
TLHGP	524.282	0.01	60	2.9	6.4			0	0	0	0	0	0	0	0	0	0	0	0	0	0	0	0	0	0	0	0	0	0	0	0	0	770	0	0	0	0	0	818	0	0	0
IHAASASV	378.213	0.02	60	2.8	6.74			0	0	0	0	0	0	0	0	0	0	0	0	0	0	0	0	0	0	0	872	0	0	0	0	0	0	0	0	738	0	0	0	0	0	0
SSSSSASSSSGSSTTSPSSSAS	382.761	0.01	60	0	5.24			0	0	0	0	0	0	0	0	0	0	0	0	0	0	0	0	0	0	0	0	0	1610	0	0	0	0	0	0	0	0	0	0	0	0	0
AGLPGA	485.276	0.01	60	14.2	5.57			0	0	0	0	0	0	0	0	0	0	0	0	0	0	0	0	0	0	0	0	1610	0	0	0	0	0	0	0	0	0	0	0	0	0	0
DAGEMVRQARILA	477.256	0.01	60	0	6.07			0	0	0	0	0	0	0	0	0	0	0	0	0	0	0	0	0	0	0	0	0	0	0	0	0	0	0	0	0	1630	0	0	0	0	0
AYSGANGILK	497.278	0.02	60	14.2	8.63			0	0	0	0	0	0	0	0	0	0	0	0	0	0	0	0	0	0	0	0	0	674	0	0	0	0	0	961	0	0	0	0	0	0	0
ALPPYLTPDA	529.281	0.01	60	0	3.8			0	0	0	0	0	0	0	0	0	0	0	0	0	0	0	0	0	0	0	0	0	0	0	1640	0	0	0	0	0	0	0	0	0	0	0
FVLAA	520.3	0.01	60	13.7	5.52			0	0	0	0	0	0	0	0	0	0	0	0	0	0	0	0	0	0	0	0	0	0	0	1660	0	0	0	0	0	0	0	0	0	0	0
KLADLRYLS	539.813	0.02	60	10.3	8.59			0	0	0	0	0	0	0	0	0	0	0	0	0	0	0	0	0	0	0	0	0	0	0	1680	0	0	0	0	0	0	0	0	0	0	0
SYALTSEEAERSDGDPVQPAVLQVHQ	942.784	0.01	60	0	4.17			0	0	0	0	0	0	0	0	0	0	0	0	0	0	0	0	0	0	0	0	0	0	0	0	0	0	1770	0	0	0	0	0	0	0	0
PAAAAP	497.286	0.01	60	19.1	5.96			0	0	0	0	0	0	0	0	0	0	0	0	0	0	0	0	0	0	0	0	0	0	0	1780	0	0	0	0	0	0	0	0	0	0	0
HELQEKLSPLGEEMRDRA	535.271	0.01	60	0	4.96			0	0	0	0	0	0	0	0	0	0	0	0	0	0	0	0	0	0	0	0	0	0	0	1790	0	0	0	0	0	0	0	0	0	0	0
EGDGT	478.186	0.01	60	0	3.67			0	0	0	0	0	0	0	0	0	0	0	0	0	0	0	0	0	0	0	0	0	0	0	0	1810	0	0	0	0	0	0	0	0	0	0
QSN(+.98)LFKKQ(+.98)ECRDILLPVITKELKELLEQK	872.241	0.01	60	0	8.14		Deamidation (NQ)	0	0	0	0	0	0	0	0	0	0	0	0	0	0	0	0	0	0	0	0	0	0	0	0	0	0	0	0	0	1810	0	0	0	0	0
PGGAEGGGV	700.325	0.01	60	0	4			0	0	0	0	0	0	0	0	0	0	0	0	0	0	0	0	0	0	1830	0	0	0	0	0	0	0	0	0	0	0	0	0	0	0	0
T(+42.01)GEVGSEVHLEINDPNVISQEEADSPSDSGQ(+.98)	1094.81	0.04	60	5.1	3.62		Acetylation (Protein N-term); Deamidation (NQ)	0	0	0	0	0	0	0	0	0	0	0	0	0	0	0	0	0	0	0	0	1840	0	0	0	0	0	0	0	0	0	0	0	0	0	0
Q(-17.03)YNPEPPPPRTHYSNIE	1011.48	0.01	60	0	5.4		Pyro-glu from Q	0	0	0	0	0	0	0	0	0	0	0	0	0	0	0	0	0	0	0	0	0	0	0	0	0	0	0	0	0	0	0	0	0	0	1850
RLSMDTPMPELQ(+.98)VGPQ(+.98)EQ	515.241	0.01	60	0	4.14		Deamidation (NQ)	0	0	0	0	0	0	0	0	0	0	0	0	0	0	0	0	0	0	0	0	0	0	1850	0	0	0	0	0	0	0	0	0	0	0	0
SSPGSPGT	689.31	0.01	60	0	5.24			0	0	0	0	0	0	0	0	0	0	0	0	0	0	0	0	0	0	0	1860	0	0	0	0	0	0	0	0	0	0	0	0	0	0	0
LGKDILEMFTISVSLAVA	636.348	0.02	60	5	4.37	sp|P98194|AT2C1_HUMAN		0	0	0	0	0	0	0	0	0	0	0	0	0	0	0	0	0	0	0	0	0	0	0	0	0	0	0	0	1900	0	0	0	0	0	0
TLFSVLVRPPPPLS	761.938	0.01	60	0	9.41			0	0	0	0	0	0	0	0	0	0	0	0	0	0	0	0	0	0	0	0	1900	0	0	0	0	0	0	0	0	0	0	0	0	0	0
DPVQPAVLQVHQ	665.86	0.01	60	0	5.08			0	0	0	0	0	0	0	0	0	0	0	0	0	0	0	0	0	0	0	0	0	0	0	0	0	0	0	0	0	0	0	0	0	0	1950
TNQLQYLQ	504.255	0.02	60	18.4	5.18			0	0	0	0	0	0	0	0	0	0	0	0	0	0	0	0	0	0	0	0	0	0	1590	370	0	0	0	0	0	0	0	0	0	0	0
RSAAVLALLLCAGQVT	793.495	0.01	60	9.8	8.25			0	0	0	0	0	0	0	0	0	0	0	0	0	0	0	0	0	0	1820	0	0	0	0	0	0	0	0	0	0	0	0	0	0	140	0
IHWESASLLR	404.556	0.01	60	0	6.75	sp|P01024|CO3_HUMAN		0	0	0	0	0	0	0	0	0	0	0	0	0	0	0	0	0	0	0	0	0	0	0	0	0	0	0	0	0	0	1970	0	0	0	0
TPGVCA	547.25	0.01	60	2.8	5.18			0	0	0	0	0	0	0	0	0	0	0	0	0	0	0	0	0	0	0	0	0	262	0	0	0	0	0	0	0	0	0	0	0	1710	0
DVLDSLTTIPEL	658.346	0.04	60	6.9	3.49			0	0	0	0	0	0	0	0	0	0	0	0	0	0	0	0	0	0	0	0	863	0	0	0	0	0	0	371	0	0	0	0	0	0	748
GEPKEVVKPVPITSPAVSKVT	541.315	0.01	60	0	8.5			0	0	0	0	0	0	0	0	0	0	0	0	0	0	0	0	0	0	0	0	1990	0	0	0	0	0	0	0	0	0	0	0	0	0	0
SGAESSKGAAFVSKQEGSEVVKRPR	519.079	0.08	60	6.1	9.69			0	0	0	0	0	0	0	0	0	0	0	0	0	0	0	0	0	0	0	0	0	0	0	0	0	0	0	498	0	0	0	0	1520	0	0
DADQN	562.206	0.06	60	3.7	3.56			0	0	0	0	0	0	0	0	0	0	0	0	0	0	0	0	0	0	0	0	0	0	2050	0	0	0	0	0	0	0	0	0	0	0	0
E(-18.01)LANIT	642.347	0.03	60	6.6	4		Pyro-glu from E	0	0	0	0	0	0	0	0	0	0	0	0	0	0	0	0	0	0	0	0	0	0	0	0	0	0	0	0	0	0	2050	0	0	0	0
KSYKPEIQNKLLIIKKKAKHK	634.656	0.01	60	9.1	10.3			0	0	0	0	0	0	0	0	0	0	0	0	0	0	0	0	0	0	0	0	0	0	0	0	0	0	0	0	970	0	0	0	1120	0	0
VSSVADVLAQ(+.98)GGG	580.793	0.03	60	3.2	3.8		Deamidation (NQ)	0	0	0	0	0	0	0	0	0	0	0	0	0	0	0	0	0	0	1470	0	0	0	0	0	0	0	0	0	0	0	0	0	633	0	0
Q(-17.03)QN(+.98)AQGGFSST	1108.44	0.01	60	0	5.52		Pyro-glu from Q; Deamidation (NQ)	0	0	0	0	0	0	0	0	0	0	0	0	0	0	0	0	0	0	0	0	0	0	0	0	0	0	0	0	0	0	0	2110	0	0	0
VQPQPQPKPQVQLHVQ	617.675	0.01	60	0	8.73	sp|Q15942|ZYX_HUMAN		0	0	0	0	0	0	0	0	0	0	0	0	0	0	0	0	0	0	0	0	0	0	0	0	0	0	0	0	0	2110	0	0	0	0	0
QGPQ(+.98)GMLGPAQ(+.98)VAVLQQQHPGALGPQGPHRQVLM(+15.99)TQ	943.974	0.01	60	0	9.76		Deamidation (NQ); Oxidation (M)	0	0	0	0	0	0	0	0	0	0	0	0	0	0	0	0	0	0	0	0	0	0	0	0	0	2110	0	0	0	0	0	0	0	0	0
Q(-17.03)EKNPLPSKETIEQEK	627.655	0.01	60	0	4.95	sp|P62328|TYB4_HUMAN	Pyro-glu from Q	0	0	0	0	0	0	0	0	0	0	0	0	0	0	0	0	0	0	0	0	0	0	0	0	0	0	0	0	0	0	0	0	0	0	2120
AAGAGQ(+.98)PAGGVAAAGGVVSGPS	855.426	0.01	60	0	5.57		Deamidation (NQ)	0	0	0	0	0	0	0	0	0	0	0	0	0	0	0	0	0	0	0	0	0	0	0	0	0	2140	0	0	0	0	0	0	0	0	0
KPRAVHK	418.267	0.01	60	7.9	11.17			0	0	0	0	0	0	0	0	0	0	0	0	0	0	0	0	0	0	956	0	0	0	0	0	0	0	0	0	0	636	0	0	0	0	553
G(+42.01)DVKLVASSHISKTS	524.281	0.02	60	3.3	8.6		Acetylation (Protein N-term)	0	0	0	0	0	0	0	0	0	0	0	0	0	0	0	0	0	0	0	0	0	0	0	0	0	0	0	0	0	2160	0	0	0	0	0
SDSTGA	537.211	0.02	60	4.9	3.8			0	0	0	0	0	0	0	0	0	0	0	0	0	0	0	0	0	0	0	0	0	0	0	0	0	0	0	890	0	1290	0	0	0	0	0
Q(+.98)VTCQ(+.98)HPEPLACPVQCVEGCH	1140.47	0.01	60	0	5.23		Deamidation (NQ)	0	0	0	0	0	0	0	0	0	0	0	0	0	0	0	0	0	0	2220	0	0	0	0	0	0	0	0	0	0	0	0	0	0	0	0
GGPLAPGSRAS	485.258	0.01	60	0	9.75			0	0	0	0	0	0	0	0	0	0	0	0	0	0	0	0	0	0	2260	0	0	0	0	0	0	0	0	0	0	0	0	0	0	0	0
Q(-17.03)QSPLAQ(+.98)Q(+.98)SPL	591.284	0.01	60	0	5.52		Pyro-glu from Q; Deamidation (NQ)	0	0	0	0	0	0	0	0	0	0	0	0	0	0	0	0	0	0	0	0	0	2260	0	0	0	0	0	0	0	0	0	0	0	0	0
QARSKGFIQ(+.98)KRKFQEIKNST	599.593	0.01	60	3	11.17		Deamidation (NQ)	0	0	0	0	0	0	0	0	0	0	0	0	0	0	0	0	0	0	0	0	0	0	0	0	0	0	0	0	0	0	0	1360	900	0	0
LIADSIAEQ(+.98)ILA	629.343	0.01	60	0	3.67		Deamidation (NQ)	0	0	0	0	0	0	0	0	0	0	0	0	0	0	0	0	0	0	0	0	0	0	0	0	0	0	0	0	0	0	0	0	2280	0	0
TCLLDSGHQ	973.441	0.01	60	0	5.05			0	0	0	0	0	0	0	0	0	0	0	0	0	0	0	0	0	0	0	0	0	0	0	0	0	2290	0	0	0	0	0	0	0	0	0
TGKIST	606.336	0.01	60	0	8.41			0	0	0	0	0	0	0	0	0	0	0	0	0	0	0	0	0	0	0	0	0	0	0	0	0	0	0	0	0	0	0	2300	0	0	0
QGPPGLMDAETDECM(+15.99)DYTGCSPGAMSSESST	793.308	0.01	60	8.8	3.29		Oxidation (M)	0	0	0	0	0	0	0	0	0	0	0	0	0	0	0	0	0	0	1520	0	0	0	0	0	0	831	0	0	0	0	0	0	0	0	0
VMDDEIESEAKKES	537.247	0.01	60	0	4.08			0	0	0	0	0	0	0	0	0	0	0	0	0	0	0	0	0	0	0	0	0	0	0	2370	0	0	0	0	0	0	0	0	0	0	0
SGEGDFLAEGGG	548.237	0.01	60	0	3.57	sp|P02671|FIBA_HUMAN		0	0	0	0	0	0	0	0	0	0	0	0	0	0	0	0	0	0	0	0	0	0	0	0	0	0	0	0	0	0	0	0	2380	0	0
N(+.98)GFKSHALQLNNRQIR	380.209	0.12	60	4.9	12.01		Deamidation (NQ)	0	0	0	0	0	0	0	0	0	0	0	0	0	0	0	0	0	0	0	0	0	0	0	0	0	0	0	0	0	0	0	0	0	2400	0
DDMTKNDPFKARVS	541.932	0.01	60	0	6.04	sp|Q15942|ZYX_HUMAN		0	0	0	0	0	0	0	0	0	0	0	0	0	0	0	0	0	0	0	0	0	0	0	0	0	0	0	0	0	0	0	0	0	0	2400
APPGK	469.273	0.02	60	2	8.8			0	0	0	0	0	0	0	0	0	0	0	0	0	0	0	0	0	0	0	0	0	2110	0	0	0	0	0	0	0	0	0	335	0	0	0
QELAEELSTALP	650.823	0.01	60	0	3.67			0	0	0	0	0	0	0	0	0	0	0	0	0	0	0	0	0	0	0	0	0	0	0	0	0	0	0	0	0	0	0	0	0	0	2490
KRKETLKN(+.98)VPFSELNLKKKKGKT	679.667	0.01	60	0	10.47		Deamidation (NQ)	0	0	0	0	0	0	0	0	0	0	0	0	0	0	0	0	0	0	0	0	0	0	0	0	2530	0	0	0	0	0	0	0	0	0	0
LGLPGPPDVPDHAAYHPF	633.978	0.01	60	0	5.05			0	0	0	0	0	0	0	0	0	0	0	0	0	0	0	0	0	0	2540	0	0	0	0	0	0	0	0	0	0	0	0	0	0	0	0
EATEGPSTHQ	1056.45	0.01	60	1.3	4.51			0	0	0	0	0	0	0	0	0	0	0	0	0	0	0	0	0	0	0	0	0	0	0	0	0	0	0	680	0	1860	0	0	0	0	0
RGGSGGSYG	399.178	0.01	60	9.5	8.75			0	0	0	0	0	0	0	0	0	0	0	0	0	0	0	0	0	0	0	0	2550	0	0	0	0	0	0	0	0	0	0	0	0	0	0
AGGGSSC	538.183	0.01	60	0	5.56			0	0	0	0	0	0	0	0	0	0	0	0	0	0	0	0	0	0	2570	0	0	0	0	0	0	0	0	0	0	0	0	0	0	0	0
KQELDKERENPFLTHDIGISESIA	554.686	0.19	60	2.4	4.64			0	0	0	0	0	0	0	0	0	0	0	0	0	0	0	0	0	0	0	0	0	0	0	0	0	0	0	0	0	0	695	0	1880	0	0
Q(+.98)CIPSTFQ(+.98)CDGDEDCKDGSDEEN(+.98)CSV	566.18	0.01	60	0	3.54		Deamidation (NQ)	0	0	0	0	0	0	0	0	0	0	0	0	0	0	0	0	0	0	0	0	2590	0	0	0	0	0	0	0	0	0	0	0	0	0	0
KTDTK	592.328	0.03	60	10.7	8.59			0	0	0	0	0	0	0	0	0	0	0	0	0	0	0	0	0	0	0	0	0	0	0	0	0	0	0	0	2640	0	0	0	0	0	0
S(+42.01)GDGDSDQ(+.98)SRNR	668.76	0.01	60	0	4.43		Acetylation (Protein N-term); Deamidation (NQ)	0	0	0	0	0	0	0	0	0	0	0	0	0	0	0	0	0	0	2670	0	0	0	0	0	0	0	0	0	0	0	0	0	0	0	0
KLKITKYLR	581.889	0.02	60	17.2	10.46			0	0	0	0	0	0	0	0	0	0	0	0	0	0	0	0	0	0	0	0	1910	0	828	0	0	0	0	0	0	0	0	0	0	0	0
Q(-17.03)TDNNPT	386.65	0.01	60	0	3.8		Pyro-glu from Q	0	0	0	0	0	0	0	0	0	0	0	0	0	0	0	0	0	0	0	0	0	0	0	0	0	0	0	0	0	2740	0	0	0	0	0
PGSGSESG	677.266	0.01	60	0	4			0	0	0	0	0	0	0	0	0	0	0	0	0	0	0	0	0	0	0	2740	0	0	0	0	0	0	0	0	0	0	0	0	0	0	0
A(+42.01)GSVADSDAVVKLDDGHLN(+.98)NSL	747.363	0.01	60	0	4.13		Acetylation (Protein N-term); Deamidation (NQ)	0	0	0	0	0	0	0	0	0	0	0	0	0	0	0	0	0	0	2740	0	0	0	0	0	0	0	0	0	0	0	0	0	0	0	0
EEPQ(+.98)EGGAPQEGGEPQ(+.98)EGGDPQEAR	860.677	0.02	60	18.4	3.72		Deamidation (NQ)	0	0	0	0	0	0	0	0	0	0	0	0	0	0	0	0	0	0	0	0	0	2770	0	0	0	0	0	0	0	0	0	0	0	0	0
NGGDT	463.18	0.01	60	0	3.8			0	0	0	0	0	0	0	0	0	0	0	0	0	0	0	0	0	0	2780	0	0	0	0	0	0	0	0	0	0	0	0	0	0	0	0
GPEASFPGLP	971.479	0.01	60	0	4			0	0	0	0	0	0	0	0	0	0	0	0	0	0	0	0	0	0	0	0	0	0	2780	0	0	0	0	0	0	0	0	0	0	0	0
ATFAVGPGHGIQLQ	465.92	0.01	60	0	6.79			0	0	0	0	0	0	0	0	0	0	0	0	0	0	0	0	0	0	0	0	2790	0	0	0	0	0	0	0	0	0	0	0	0	0	0
SCQ(+.98)DEGCGLESEQSCSMWM(+15.99)EDSPS	661.225	0.02	60	0.9	3.34		Deamidation (NQ); Oxidation (M)	0	0	0	0	0	0	0	0	0	0	0	0	0	0	0	0	0	0	0	772	0	0	0	0	0	0	0	0	2030	0	0	0	0	0	0
AIQLTYN(+.98)PDESSKPNM(+15.99)IDAATL	1205.09	0.01	60	0	4.03		Deamidation (NQ); Oxidation (M)	0	0	0	0	0	0	0	0	0	0	0	0	0	0	0	0	0	0	2830	0	0	0	0	0	0	0	0	0	0	0	0	0	0	0	0
TFESKSYKMADEAGSEADHEGTHST	679.539	0.01	60	0	4.63	sp|P02671|FIBA_HUMAN		0	0	0	0	0	0	0	0	0	0	0	0	0	0	0	0	0	0	0	0	0	0	0	2830	0	0	0	0	0	0	0	0	0	0	0
KKSLEDKTERELLESYIDGR	603.074	0.01	60	0	5.06			0	0	0	0	0	0	0	0	0	0	0	0	0	0	0	0	0	0	0	0	0	0	0	0	0	2850	0	0	0	0	0	0	0	0	0
WQCGEGFRQ(+.98)LDLLCD	892.394	0.01	60	5.7	4.03		Deamidation (NQ)	0	0	0	0	0	0	0	0	0	0	0	0	0	0	0	0	0	0	0	0	0	846	0	0	0	0	0	0	0	2030	0	0	0	0	0
DPGPPGDQ(+.98)GPPGPDGPR	538.573	0.02	60	9.3	3.93		Deamidation (NQ)	0	0	0	0	0	0	0	0	0	0	0	0	0	0	0	0	0	0	0	0	0	0	0	0	0	978	1910	0	0	0	0	0	0	0	0
Q(-17.03)AGAAGSRMNFRPG	468.226	0.01	60	0	12		Pyro-glu from Q	0	0	0	0	0	0	0	0	0	0	0	0	0	0	0	0	0	0	0	0	0	0	0	2890	0	0	0	0	0	0	0	0	0	0	0
YLQGAKIPKPEAS	467.934	0.01	60	0	8.5			0	0	0	0	0	0	0	0	0	0	0	0	0	0	0	0	0	0	0	0	0	0	0	2990	0	0	0	0	0	0	0	0	0	0	0
KQPGPQ(+.98)LDA	477.747	0.01	60	0	5.84		Deamidation (NQ)	0	0	0	0	0	0	0	0	0	0	0	0	0	0	0	0	0	0	0	0	0	0	2990	0	0	0	0	0	0	0	0	0	0	0	0
E(-18.01)MN(+.98)FSLLVEDT	640.789	0.01	60	0	3.57		Pyro-glu from E; Deamidation (NQ)	0	0	0	0	0	0	0	0	0	0	0	0	0	0	0	0	0	0	0	0	0	3000	0	0	0	0	0	0	0	0	0	0	0	0	0
EEFPF	668.294	0.01	60	0	3.8			0	0	0	0	0	0	0	0	0	0	0	0	0	0	0	0	0	0	0	0	0	0	0	0	0	0	0	0	0	0	0	0	3010	0	0
LVICIVVVVAILG	655.917	0.01	60	2.4	5.52			0	0	0	0	0	0	0	0	0	0	0	0	0	0	0	0	0	0	0	0	2570	0	0	0	0	0	0	0	0	0	448	0	0	0	0
FEKKSLEDKTERELLES	521.022	0.01	60	0	4.72			0	0	0	0	0	0	0	0	0	0	0	0	0	0	0	0	0	0	0	0	0	0	3050	0	0	0	0	0	0	0	0	0	0	0	0
QGVSDQ(+.98)SFQVEEAKRI	911.47	0.01	60	0	4.68		Deamidation (NQ)	0	0	0	0	0	0	0	0	0	0	0	0	0	0	0	0	0	0	3060	0	0	0	0	0	0	0	0	0	0	0	0	0	0	0	0
GGSGPAG	502.223	0.01	60	13.4	5.52			0	0	0	0	0	0	0	0	0	0	0	0	0	0	0	0	0	0	0	0	3090	0	0	0	0	0	0	0	0	0	0	0	0	0	0
LVLAGVPSSSS	508.783	0.01	60	0	5.52			0	0	0	0	0	0	0	0	0	0	0	0	0	0	0	0	0	0	0	0	0	3090	0	0	0	0	0	0	0	0	0	0	0	0	0
R(+42.01)PDEEVFYCKVTNEIFRHYD	868.072	0.01	60	0	4.9		Acetylation (Protein N-term)	0	0	0	0	0	0	0	0	0	0	0	0	0	0	0	0	0	0	0	3090	0	0	0	0	0	0	0	0	0	0	0	0	0	0	0
TAGLGGKGGPY	489.256	0.01	60	0	8.26	sp|A3KMH1|VWA8_HUMAN		0	0	0	0	0	0	0	0	0	0	0	0	0	0	0	0	0	0	0	0	0	0	0	0	0	0	0	0	0	0	0	0	0	3110	0
TDVLDSLTTIPEL	708.872	0.06	60	3	3.49			0	0	0	0	0	0	0	0	0	0	0	0	0	0	0	0	0	0	0	0	0	0	0	0	0	0	0	557	611	839	0	0	344	0	766
GPPGPPGPM(+15.99)GPPGPPGPT	790.387	0.01	60	9.9	5.52		Oxidation (M)	0	0	0	0	0	0	0	0	0	0	0	0	0	0	0	0	0	0	0	0	0	0	1040	0	0	0	0	0	0	0	0	0	0	0	2090
GYNCT	557.208	0.01	60	0	5.52			0	0	0	0	0	0	0	0	0	0	0	0	0	0	0	0	0	0	0	0	0	0	0	3140	0	0	0	0	0	0	0	0	0	0	0
SLN(+.98)EEAVKK	509.768	0.01	60	4.9	5.86		Deamidation (NQ)	0	0	0	0	0	0	0	0	0	0	0	0	0	0	0	0	0	0	0	0	0	0	0	0	3200	0	0	0	0	0	0	0	0	0	0
AGGCGHDECD	963.274	0.01	60	8.4	4.02			0	0	0	0	0	0	0	0	0	0	0	0	0	0	0	0	0	0	0	0	0	1830	0	0	0	0	0	0	0	0	1400	0	0	0	0
KKIFGL	353.233	0.01	60	0	10	sp|Q5T3J3|LRIF1_HUMAN		0	0	0	0	0	0	0	0	0	0	0	0	0	0	0	0	0	0	0	0	0	0	0	3240	0	0	0	0	0	0	0	0	0	0	0
DGDNDHEALGVGDN	476.519	0.01	60	0	3.71			0	0	0	0	0	0	0	0	0	0	0	0	0	0	0	0	0	0	0	0	0	0	0	0	0	0	0	0	0	0	0	0	3250	0	0
LAEGGGVR	379.711	0.04	60	2.8	6	sp|P02671|FIBA_HUMAN		0	0	0	0	0	0	0	0	0	0	0	0	0	0	0	0	0	0	1810	0	0	1150	0	0	0	0	0	0	0	0	0	0	309	0	0
SVVPSPKVSDTVVEPYNATLSVH	1213.13	0.01	60	0	5.3			0	0	0	0	0	0	0	0	0	0	0	0	0	0	0	0	0	0	0	0	0	0	0	0	0	3270	0	0	0	0	0	0	0	0	0
GGGSSSGSSGGGGGSGSGSGG	486.187	0.01	60	0	5.52			0	0	0	0	0	0	0	0	0	0	0	0	0	0	0	0	0	0	0	0	0	3270	0	0	0	0	0	0	0	0	0	0	0	0	0
Q(-17.03)LSEKEIQKKIEEERA	486.012	0.02	60	5.7	5.07		Pyro-glu from Q	0	0	0	0	0	0	0	0	0	0	0	0	0	0	0	0	0	0	0	0	1930	0	0	0	0	1360	0	0	0	0	0	0	0	0	0
GQKQ(+.98)Q(+.98)LVDAFLKLAKQRSVCTWGKNKPGIGAVILKRAKALAGQ	1155.9	0.01	60	6.7	10.74	sp|Q9Y2M0|FAN1_HUMAN	Deamidation (NQ)	0	0	0	0	0	0	0	0	0	0	0	0	0	0	0	0	0	0	0	0	0	0	0	1690	0	0	0	235	0	811	557	0	0	0	0
DRLTSVHAV	499.29	0.03	60	12.6	6.74			0	0	0	0	0	0	0	0	0	0	0	0	0	0	0	0	0	0	0	0	0	0	0	3340	0	0	0	0	0	0	0	0	0	0	0
GFKSHALQLNNRQI	542.634	0.1	60	1.8	11			0	0	0	0	0	0	0	0	0	0	0	0	0	0	0	0	0	0	0	0	0	0	0	0	0	0	0	0	0	0	0	0	0	3390	0
IEGSHLNAGSDVAVSVGGR	912.955	0.01	60	0.1	5.32			0	0	0	0	0	0	0	0	0	0	0	0	0	0	0	0	0	0	0	1030	0	2380	0	0	0	0	0	0	0	0	0	0	0	0	0
EKVDVGKDQEFTVKSKGAGGQGKVASKIVGPSG	822.692	0.01	60	18.7	9.31			0	0	0	0	0	0	0	0	0	0	0	0	0	0	0	0	0	0	0	0	0	0	0	0	0	1280	0	0	0	2160	0	0	0	0	0
VCWDSQ(+.98)PGDEAQ(+.98)PQ(+.98)	781.791	0.01	60	0	3.49		Deamidation (NQ)	0	0	0	0	0	0	0	0	0	0	0	0	0	0	0	0	0	0	0	0	0	3440	0	0	0	0	0	0	0	0	0	0	0	0	0
A(+42.01)AREELYSKVTPRRN	458.748	0.03	60	3.3	9.98		Acetylation (Protein N-term)	0	0	0	0	0	0	0	0	0	0	0	0	0	0	0	0	0	0	0	0	0	0	0	0	0	0	0	0	0	2330	0	0	1130	0	0
E(-18.01)GGCGACT	679.216	0.03	60	3.1	4		Pyro-glu from E	0	0	0	0	0	0	0	0	0	0	0	0	0	0	0	0	0	0	0	1610	0	0	0	0	0	0	0	0	0	0	0	0	1900	0	0
Q(-17.03)HKCGNMSEAFREAGIQP	497.231	0.01	60	6.4	6.75		Pyro-glu from Q	0	0	0	0	0	0	0	0	0	0	0	0	0	0	0	0	0	0	0	0	0	0	0	0	0	0	0	0	0	2260	0	0	0	1250	0
TIGLGLG	630.381	0.01	60	6.4	5.19			0	0	0	0	0	0	0	0	0	0	0	0	0	0	0	0	0	0	0	0	0	0	3560	0	0	0	0	0	0	0	0	0	0	0	0
TAFGGRRAVPPNNSNAAEDDLPTVELQ	947.136	0.01	60	0	4.32			0	0	0	0	0	0	0	0	0	0	0	0	0	0	0	0	0	0	0	0	0	0	0	0	0	0	3620	0	0	0	0	0	0	0	0
MSGVS	480.202	0.01	60	3.4	5.28			0	0	0	0	0	0	0	0	0	0	0	0	0	0	0	0	0	0	0	589	0	0	0	0	0	0	0	0	0	0	0	0	3100	0	0
GGRGGGGDHK	449.214	0.07	60	6.7	8.75			0	0	0	0	0	0	0	0	0	0	0	0	0	0	0	0	0	0	0	0	0	1140	1680	0	0	0	0	0	0	0	0	896	0	0	0
QKVSGNQ(+.98)QIVGQPQ(+.98)I	813.417	0.01	60	0	8.75		Deamidation (NQ)	0	0	0	0	0	0	0	0	0	0	0	0	0	0	0	0	0	0	0	0	0	0	3720	0	0	0	0	0	0	0	0	0	0	0	0
KSGGLLLT	788.475	0.01	60	11.5	8.75			0	0	0	0	0	0	0	0	0	0	0	0	0	0	0	0	0	0	2780	0	0	494	0	0	0	0	0	0	0	235	214	0	0	0	0
Q(+.98)VSEVTAQPPPEEEEDQNEDQDVPDLT	1013.76	0.02	60	0	3.14		Deamidation (NQ)	0	0	0	0	0	0	0	0	0	0	0	0	0	0	0	0	0	0	0	0	0	0	0	0	0	0	0	0	0	0	0	0	3740	0	0
DGTKVNCTCGATAVAVPSNIQG	1053.51	0.11	60	7.7	5.82			0	0	0	0	0	0	0	0	0	0	0	0	0	0	0	0	0	0	0	0	0	0	3750	0	0	0	0	0	0	0	0	0	0	0	0
KKEDEIKQ(+.98)WLGKVSPEDVEYFN(+.98)CQQ(+.98)ELASELNKQ	811.982	0.01	60	0	4.6		Deamidation (NQ)	0	0	0	0	0	0	0	0	0	0	0	0	0	0	0	0	0	0	0	0	0	0	0	0	0	0	0	0	0	0	0	0	0	3750	0
HLSQDTGSPSGMRPWEDLPSQ(+.98)DTGSPS	957.43	0.01	60	0	4.22		Deamidation (NQ)	0	0	0	0	0	0	0	0	0	0	0	0	0	0	0	0	0	0	0	0	3750	0	0	0	0	0	0	0	0	0	0	0	0	0	0
QPPPG	495.252	0.01	60	7.6	5.52			0	0	0	0	0	0	0	0	0	0	0	0	0	0	0	0	0	0	0	0	0	0	3790	0	0	0	0	0	0	0	0	0	0	0	0
LPGPQGPIGPPGEKGPQGKPGLAGLPGA	848.795	0.01	60	7.8	8.59			0	0	0	0	0	0	0	0	0	0	0	0	0	0	0	0	0	0	0	0	0	0	0	0	0	0	0	0	0	1430	0	0	0	0	2360
YECVAS	671.273	0.01	60	0	4			0	0	0	0	0	0	0	0	0	0	0	0	0	0	0	0	0	0	0	0	0	0	0	3800	0	0	0	0	0	0	0	0	0	0	0
DAPTT	504.23	0.01	60	0	3.8			0	0	0	0	0	0	0	0	0	0	0	0	0	0	0	0	0	0	3830	0	0	0	0	0	0	0	0	0	0	0	0	0	0	0	0
CLVVR	589.344	0.01	60	12.2	8.25			0	0	0	0	0	0	0	0	0	0	0	0	0	0	0	0	0	0	0	0	0	0	0	0	0	0	0	0	0	0	0	0	0	0	3860
EMPSEEGYQDYEPEA	887.345	0.02	60	10.4	3.4			0	0	0	0	0	0	0	0	0	0	0	0	0	0	0	0	0	0	1790	0	0	0	0	0	0	1250	825	0	0	0	0	0	0	0	0
VGGIAQIIAAQEE	649.841	0.01	60	0	3.79			0	0	0	0	0	0	0	0	0	0	0	0	0	0	0	0	0	0	0	0	0	0	0	0	0	0	0	0	0	3870	0	0	0	0	0
VPARYRKEQ(+.98)TLLKQ(+.98)LPCIPLVENLLKDGTD	863.993	0.01	60	6.4	8.13		Deamidation (NQ)	0	0	0	0	0	0	0	0	0	0	0	0	0	0	0	0	0	0	0	0	0	0	0	3300	0	0	0	600	0	0	0	0	0	0	0
Q(-17.03)PPTVVPGGDLAKVQR	822.954	0.01	60	0	8.75	sp|P68366|TBA4A_HUMAN	Pyro-glu from Q	0	0	0	0	0	0	0	0	0	0	0	0	0	0	0	0	0	0	0	0	0	0	0	0	0	0	0	0	0	0	0	0	0	0	3910
VVGMVKSLTRSS	632.364	0.01	60	9.1	11			0	0	0	0	0	0	0	0	0	0	0	0	0	0	0	0	0	0	0	0	0	0	3910	0	0	0	0	0	0	0	0	0	0	0	0
KERLKQ(+.98)KHKKRPESPPSILTPPVVPTADK	661.996	0.01	60	17.9	10.29		Deamidation (NQ)	0	0	0	0	0	0	0	0	0	0	0	0	0	0	0	0	0	0	2690	0	0	0	0	0	0	1240	0	0	0	0	0	0	0	0	0
FGIYKRIKPL	617.903	0.01	60	0.2	10.29			0	0	0	0	0	0	0	0	0	0	0	0	0	0	0	0	0	0	0	0	0	0	0	0	0	1910	0	0	0	0	0	0	2030	0	0
PSADGDADNCC	1067.36	0.01	60	5.3	3.42			0	0	0	0	0	0	0	0	0	0	0	0	0	0	0	0	0	0	0	0	0	1880	0	0	0	0	0	2080	0	0	0	0	0	0	0
RGRPKGRG	883.556	0.01	60	3.9	12.3			0	0	0	0	0	0	0	0	0	0	0	0	0	0	0	0	0	0	1070	0	1520	0	0	0	0	0	1400	0	0	0	0	0	0	0	0
SSGVKSTHQAAIVSKIDSRLE	554.052	0.01	60	0.9	8.33			0	0	0	0	0	0	0	0	0	0	0	0	0	0	0	0	0	0	0	0	0	0	0	0	0	0	0	0	0	0	0	0	1530	2500	0
QGGLGSQ(+.98)VSALPPNSLVRKVKRTLPSPP	962.199	0.01	60	1.5	12.02		Deamidation (NQ)	0	0	0	0	0	0	0	0	0	0	0	0	0	0	0	0	0	0	0	0	0	0	0	0	0	0	1060	0	0	0	0	0	0	0	2970
GGGGGGGGGGGGGGGGV	515.719	0.05	60	3.2	5.52			0	0	0	0	0	0	0	0	0	0	0	0	0	0	0	0	0	0	1610	0	0	0	0	0	1190	0	0	0	377	0	0	0	865	0	0
PGPM(+15.99)GPPGLAGPPGESGREGAPGAEGS	481.219	0.02	60	7.8	4.25		Oxidation (M)	0	0	0	0	0	0	0	0	0	0	0	0	0	0	0	0	0	0	0	0	2340	0	1710	0	0	0	0	0	0	0	0	0	0	0	0
QEKTESLIQ(+.98)Q(+.98)YEAISLLN(+.98)SE	776.039	0.01	60	0	4.09	sp|Q9UPN3|MACF1_HUMAN	Deamidation (NQ)	0	0	0	0	0	0	0	0	0	0	0	0	0	0	0	0	0	0	4080	0	0	0	0	0	0	0	0	0	0	0	0	0	0	0	0
VSSHGE	615.264	0.01	60	0	5.24			0	0	0	0	0	0	0	0	0	0	0	0	0	0	0	0	0	0	0	0	0	4120	0	0	0	0	0	0	0	0	0	0	0	0	0
KYGCNFN(+.98)N(+.98)GGCHQ(+.98)DC	831.78	0.03	60	2.4	6.72		Deamidation (NQ)	0	0	0	0	0	0	0	0	0	0	0	0	0	0	0	0	0	0	819	0	0	0	2670	0	0	726	0	0	0	0	0	0	0	0	0
QELWQEEEQ	406.845	0.04	60	3.1	3.58			0	0	0	0	0	0	0	0	0	0	0	0	0	0	0	0	0	0	0	0	0	0	0	0	0	0	0	0	385	2820	0	0	1030	0	0
KEMATQLAFMRLLANYASQ(+.98)N(+.98)	576.275	0.01	60	11.5	8.59		Deamidation (NQ)	0	0	0	0	0	0	0	0	0	0	0	0	0	0	0	0	0	0	0	0	0	0	835	3400	0	0	0	0	0	0	0	0	0	0	0
AGPGD	416.181	0.01	60	16.9	3.8			0	0	0	0	0	0	0	0	0	0	0	0	0	0	0	0	0	0	0	0	2340	0	0	0	1910	0	0	0	0	0	0	0	0	0	0
QYGALETRGGFNPRVERTLLDARR	925.843	0.01	60	6.8	10.61			0	0	0	0	0	0	0	0	0	0	0	0	0	0	0	0	0	0	0	0	0	0	0	0	0	0	2390	0	0	0	1860	0	0	0	0
GIPGVKGQPGLPGPPGLPGP	448.764	0.02	60	1.7	8.75			0	0	0	0	0	0	0	0	0	0	0	0	0	0	0	0	0	0	0	0	0	0	0	1640	0	0	0	0	0	0	0	0	0	0	2690
QSSGFGQ(+.98)HGTGSGQSSGFGQYESRSRQSSYGQ(+.98)HGSGSSQSSGYGQHGSN(+.98)SGQTS	1081.65	0.01	60	0	8.52		Deamidation (NQ)	0	0	0	0	0	0	0	0	0	0	0	0	0	0	0	0	0	0	0	0	0	4360	0	0	0	0	0	0	0	0	0	0	0	0	0
MAVSNALFAK	526.275	0.01	60	0	8.5			0	0	0	0	0	0	0	0	0	0	0	0	0	0	0	0	0	0	0	0	0	0	0	0	0	0	0	0	0	4390	0	0	0	0	0
QASAERDELASRCRVVSEQ(+.98)LQA	816.409	0.01	60	4.3	4.87		Deamidation (NQ)	0	0	0	0	0	0	0	0	0	0	0	0	0	0	0	0	0	0	0	0	0	0	0	0	0	0	0	0	0	2750	1640	0	0	0	0
PYQQGM(+15.99)SM(+15.99)PDV	642.749	0.01	60	0	3.8		Oxidation (M)	0	0	0	0	0	0	0	0	0	0	0	0	0	0	0	0	0	0	0	0	0	0	0	0	0	0	0	0	0	0	0	0	4400	0	0
LLSCNTPSSATMSLLAVK	918.479	0.02	60	8.7	8.22			0	0	0	0	0	0	0	0	0	0	0	0	0	0	0	0	0	0	2470	0	0	0	0	0	0	0	0	0	946	0	0	0	1030	0	0
KIKSDANIAGFSLPGPKAD	643.683	0.02	60	2.5	8.5			0	0	0	0	0	0	0	0	0	0	0	0	0	0	0	0	0	0	0	0	1350	0	0	3130	0	0	0	0	0	0	0	0	0	0	0
NGM(+15.99)APSPSQSESAGSVSEGEEMDTAEIAR	980.746	0.02	60	2.3	3.83		Oxidation (M)	0	0	0	0	0	0	0	0	0	0	0	0	0	0	0	0	0	0	3100	0	0	1380	0	0	0	0	0	0	0	0	0	0	0	0	0
Q(-17.03)SPGKCGK	394.188	0.02	60	5.4	9.31		Pyro-glu from Q	0	0	0	0	0	0	0	0	0	0	0	0	0	0	0	0	0	0	0	0	0	0	0	3670	0	0	0	841	0	0	0	0	0	0	0
EEYPDRIMNSF	700.806	0.01	60	15.7	4.14			0	0	0	0	0	0	0	0	0	0	0	0	0	0	0	0	0	0	0	1510	0	0	0	0	0	0	0	0	0	0	0	0	3010	0	0
GELKGGDGGGSAGGGAGGGSGGGAGSPPQ	553.989	0.08	60	4.8	4.37			0	0	0	0	0	0	0	0	0	0	0	0	0	0	0	0	0	0	0	0	0	0	0	0	0	0	0	0	0	0	0	0	0	1870	2690
EVAYIDGQV	497.242	0.02	60	4.7	3.67			0	0	0	0	0	0	0	0	0	0	0	0	0	0	0	0	0	0	0	0	0	0	4560	0	0	0	0	0	0	0	0	0	0	0	0
TQEKN(+.98)PLPSKETIEQEKQAGES	824.745	0.01	60	0	4.65	sp|P62328|TYB4_HUMAN	Deamidation (NQ)	0	0	0	0	0	0	0	0	0	0	0	0	0	0	0	0	0	0	0	0	0	0	0	0	0	4570	0	0	0	0	0	0	0	0	0
ELKKVC	360.204	0.01	60	0	8.29			0	0	0	0	0	0	0	0	0	0	0	0	0	0	0	0	0	0	0	0	0	0	4580	0	0	0	0	0	0	0	0	0	0	0	0
IHWESASLL	528.278	0.01	60	0	5.24	sp|P01024|CO3_HUMAN		0	0	0	0	0	0	0	0	0	0	0	0	0	0	0	0	0	0	4710	0	0	0	0	0	0	0	0	0	0	0	0	0	0	0	0
KTPRTPKRQGTQPPGFLPNCTWPHSVNSSPE	1148.91	0.02	60	3.4	10.05			0	0	0	0	0	0	0	0	0	0	0	0	0	0	0	0	0	0	0	0	0	0	0	0	0	0	0	0	0	0	0	4750	0	0	0
GGGGGGGSGGGGGGGGAGAGGAGAGAVA	591.258	0.02	60	1.7	5.52			0	0	0	0	0	0	0	0	0	0	0	0	0	0	0	0	0	0	0	0	1390	0	0	1710	0	0	0	0	0	1660	0	0	0	0	0
DYM(+15.99)QVNGGNN(+.98)CMDMRRSLCYRNYYADNQTCDGELLFN(+.98)MT	928.165	0.01	60	0	4.36		Oxidation (M); Deamidation (NQ)	0	0	0	0	0	0	0	0	0	0	0	0	0	0	0	0	0	0	0	0	0	0	4760	0	0	0	0	0	0	0	0	0	0	0	0
EQ(+.98)KQQ(+.98)LFAATN(+.98)RTT	546.934	0.01	60	7.9	8.85		Deamidation (NQ)	0	0	0	0	0	0	0	0	0	0	0	0	0	0	0	0	0	0	0	0	3360	0	0	0	0	0	1460	0	0	0	0	0	0	0	0
EPVLLVGETGTGK	650.361	0.01	60	0	4.53			0	0	0	0	0	0	0	0	0	0	0	0	0	0	0	0	0	0	0	4850	0	0	0	0	0	0	0	0	0	0	0	0	0	0	0
LQ(+.98)TLVKLIVLMFSTLLLVVIRVQVIQ(+.98)SQ(+.98)LP	1136.67	0.01	60	16.5	11		Deamidation (NQ)	0	0	0	0	0	0	0	0	0	0	0	0	0	0	0	0	0	0	0	1370	0	3460	0	0	0	0	0	0	0	0	0	0	116	0	0
STQPSNAAGTNTTS	446.213	0.02	60	3.6	5.24			0	0	0	0	0	0	0	0	0	0	0	0	0	0	0	0	0	0	0	0	0	2780	0	0	0	0	0	2200	0	0	0	0	0	0	0
HNGEGN(+.98)GQSGH	547.722	0.01	60	2.5	5.98		Deamidation (NQ)	0	0	0	0	0	0	0	0	0	0	0	0	0	0	0	0	0	0	4040	0	0	963	0	0	0	0	0	0	0	0	0	0	0	0	0
S(+42.01)DKPDM(+15.99)AEIEKFDKSKLKKTETQ	689.352	0.01	60	2.9	6.03	sp|P62328|TYB4_HUMAN	Acetylation (Protein N-term); Oxidation (M)	0	0	0	0	0	0	0	0	0	0	0	0	0	0	0	0	0	0	0	0	2210	0	0	2820	0	0	0	0	0	0	0	0	0	0	0
CGALCFPVPGGCAAAQ(+.98)HS	563.908	0.01	60	11.7	6.71		Deamidation (NQ)	0	0	0	0	0	0	0	0	0	0	0	0	0	0	0	0	0	0	0	0	0	0	5070	0	0	0	0	0	0	0	0	0	0	0	0
QENGQREEEEEEK	545.232	0.04	60	8.5	4.12			0	0	0	0	0	0	0	0	0	0	0	0	0	0	0	0	0	0	0	0	0	0	3260	0	0	0	0	0	0	0	0	0	0	0	1830
GGQDCSGSC	813.254	0.03	60	5	3.8			0	0	0	0	0	0	0	0	0	0	0	0	0	0	0	0	0	0	0	0	0	0	0	0	1390	0	0	0	0	0	0	0	3750	0	0
RQCISGN(+.98)CDDMDSPQSPQDDVTETPSNPN	788.568	0.01	60	7	3.61	sp|Q8NET8|TRPV3_HUMAN	Deamidation (NQ)	0	0	0	0	0	0	0	0	0	0	0	0	0	0	0	0	0	0	1760	0	0	0	0	0	3460	0	0	0	0	0	0	0	0	0	0
KFSPGAPGGSGSQPNQKLGHPEALS	612.813	0.02	60	2.9	8.6	sp|Q15942|ZYX_HUMAN		0	0	0	0	0	0	0	0	0	0	0	0	0	0	0	0	0	0	0	0	1620	0	0	3620	0	0	0	0	0	0	0	0	0	0	0
LGAAASRNASLEVAVLR	425.258	0.01	60	0	9.6			0	0	0	0	0	0	0	0	0	0	0	0	0	0	0	0	0	0	0	0	5260	0	0	0	0	0	0	0	0	0	0	0	0	0	0
Q(-17.03)SLQEETVRKGPAGDRGP	636.656	0.17	60	4	6.18		Pyro-glu from Q	0	0	0	0	0	0	0	0	0	0	0	0	0	0	0	0	0	0	0	0	0	0	5310	0	0	0	0	0	0	0	0	0	0	0	0
YTVAGGLAAVIYTDALQTL	970.532	0.01	60	1.5	3.8			0	0	0	0	0	0	0	0	0	0	0	0	0	0	0	0	0	0	0	0	0	5340	0	0	0	0	0	0	0	0	0	0	0	0	0
VKVQGPKGLVEPVDVVDNADGTQTVN	893.464	0.02	60	2.3	4.23			0	0	0	0	0	0	0	0	0	0	0	0	0	0	0	0	0	0	0	0	0	0	0	0	0	0	1890	0	0	3470	0	0	0	0	0
Q(-17.03)GSGSSH	642.247	0.01	60	0	6.74		Pyro-glu from Q	0	0	0	0	0	0	0	0	0	0	0	0	0	0	0	0	0	0	0	0	0	0	0	0	0	0	0	0	0	0	0	0	5390	0	0
TSLGSWHGVEGEGAHP	405.947	0.04	60	2.9	5.21			0	0	0	0	0	0	0	0	0	0	0	0	0	0	0	0	0	0	5290	0	0	16.9	0	0	0	0	7.14	0	0	0	0	0	0	82.6	0
NMVAFCAFG	480.204	0.03	60	3	5.52			0	0	0	0	0	0	0	0	0	0	0	0	0	0	0	0	0	0	4390	0	0	0	0	0	0	0	0	0	719	0	328	0	0	0	0
SN(+.98)N(+.98)LRITLQFLISLCGVSSDTVL	624.576	0.01	60	10.1	5.55		Deamidation (NQ)	0	0	0	0	0	0	0	0	0	0	0	0	0	0	0	0	0	0	0	0	0	0	2190	1620	0	0	0	0	0	0	0	0	0	0	1770
LDSET	564.245	0.01	60	6.3	3.67			0	0	0	0	0	0	0	0	0	0	0	0	0	0	0	0	0	0	0	0	0	0	3960	0	0	0	0	0	0	0	0	0	0	1750	0
NVEGGWAEGGRGV	644.296	0.01	60	0	4.53			0	0	0	0	0	0	0	0	0	0	0	0	0	0	0	0	0	0	5720	0	0	0	0	0	0	0	0	0	0	0	0	0	0	0	0
EELTGRLAQ(+.98)ARGAA	722.374	0.04	60	8.1	6.24		Deamidation (NQ)	0	0	0	0	0	0	0	0	0	0	0	0	0	0	0	0	0	0	976	0	0	1120	0	0	0	0	0	0	0	0	0	0	3690	0	0
PTNVKVVLPAA	554.837	0.04	60	2.5	9.18			0	0	0	0	0	0	0	0	0	0	0	0	0	0	0	0	0	0	0	0	0	0	0	0	0	0	0	0	1610	2150	1000	0	1090	0	0
KSKFKSTIAAL	597.364	0.01	60	0	10.3			0	0	0	0	0	0	0	0	0	0	0	0	0	0	0	0	0	0	0	5860	0	0	0	0	0	0	0	0	0	0	0	0	0	0	0
HVTQASSSSVTITW	752.385	0.04	60	7.5	6.74			0	0	0	0	0	0	0	0	0	0	0	0	0	0	0	0	0	0	0	3380	715	1780	0	0	0	0	0	0	0	0	0	0	0	0	0
GFAGSPGARGFPG	589.273	0.02	60	0	9.75	sp|P05997|CO5A2_HUMAN		0	0	0	0	0	0	0	0	0	0	0	0	0	0	0	0	0	0	0	0	0	5910	0	0	0	0	0	0	0	0	0	0	0	0	0
KAPKKPTSTKKPKTM(+15.99)PRVRKPKTT	688.429	0.02	60	0	12.06		Oxidation (M)	0	0	0	0	0	0	0	0	0	0	0	0	0	0	0	0	0	0	0	0	0	0	0	0	5950	0	0	0	0	0	0	0	0	0	0
ADAEGESDLENSRKLLS	611.967	0.01	60	0	4.18			0	0	0	0	0	0	0	0	0	0	0	0	0	0	0	0	0	0	0	0	0	0	0	0	0	0	0	0	0	0	0	0	0	0	5990
AHGLP	494.281	0.02	60	1.2	6.79			0	0	0	0	0	0	0	0	0	0	0	0	0	0	0	0	0	0	0	0	0	0	0	6010	0	0	0	0	0	0	0	0	0	0	0
GHAGGN	512.219	0.03	60	1.2	6.74			0	0	0	0	0	0	0	0	0	0	0	0	0	0	0	0	0	0	4940	0	0	1090	0	0	0	0	0	0	0	0	0	0	0	0	0
QSLNQDSPLSQ(+.98)PRSPAQI	983.987	0.01	60	0	5.84		Deamidation (NQ)	0	0	0	0	0	0	0	0	0	0	0	0	0	0	0	0	0	0	0	0	0	0	0	0	0	0	0	0	0	0	0	0	6060	0	0
GAGGAGFSMGFG	1015.42	0.03	60	8.1	5.52			0	0	0	0	0	0	0	0	0	0	0	0	0	0	0	0	0	0	0	0	3100	0	0	0	0	1100	0	0	0	0	1020	992	0	0	0
ESFEKIEDN(+.98)LITFVCET	505.24	0.02	60	4.8	3.91		Deamidation (NQ)	0	0	0	0	0	0	0	0	0	0	0	0	0	0	0	0	0	0	0	0	0	0	5990	0	0	0	0	0	452	0	0	0	0	0	0
GNTELKDTAP	523.256	0.01	60	4.9	4.37			0	0	0	0	0	0	0	0	0	0	0	0	0	0	0	0	0	0	0	0	0	0	0	6500	0	0	0	0	0	0	0	0	0	0	0
PQSTGICS	792.378	0.01	60	3.2	5.91			0	0	0	0	0	0	0	0	0	0	0	0	0	0	0	0	0	0	0	0	2320	0	0	0	0	0	0	0	0	0	0	0	0	0	4180
YAGGGGGPT	736.327	0.03	60	4.1	5.52			0	0	0	0	0	0	0	0	0	0	0	0	0	0	0	0	0	0	0	0	0	0	0	0	3330	0	0	0	0	0	0	0	3260	0	0
TFFNPR	391.203	0.01	60	0	9.41			0	0	0	0	0	0	0	0	0	0	0	0	0	0	0	0	0	0	0	0	0	6600	0	0	0	0	0	0	0	0	0	0	0	0	0
HEGPP	536.265	0.01	60	18.2	5.24			0	0	0	0	0	0	0	0	0	0	0	0	0	0	0	0	0	0	0	0	0	0	0	0	0	0	0	0	0	0	0	0	6610	0	0
N(+.98)LDFLKAVDTNRASVGQDSPEPR	633.312	0.01	60	6.8	4.68		Deamidation (NQ)	0	0	0	0	0	0	0	0	0	0	0	0	0	0	0	0	0	0	4390	2330	0	0	0	0	0	0	0	0	0	0	0	0	0	0	0
KGPPGPPGPSGA	509.772	0.04	60	9.2	8.75			0	0	0	0	0	0	0	0	0	0	0	0	0	0	0	0	0	0	0	0	0	0	0	0	5470	0	0	1260	0	0	0	0	0	0	0
PAEILRQVT	513.796	0.01	60	8.8	6.43			0	0	0	0	0	0	0	0	0	0	0	0	0	0	0	0	0	0	0	0	0	0	0	0	0	0	0	0	0	0	0	6730	0	0	0
NNNQQ	617.258	0.12	60	3.5	5.52	sp|Q99698|LYST_HUMAN		0	0	0	0	0	0	0	0	0	0	0	0	0	0	0	0	0	0	0	0	1790	0	0	3600	0	0	1350	0	0	0	0	0	0	0	0
EGRSAVVDSVC	561.275	0.01	60	18.1	4.37			0	0	0	0	0	0	0	0	0	0	0	0	0	0	0	0	0	0	0	0	0	0	6750	0	0	0	0	0	0	0	0	0	0	0	0
A(+42.01)EGKAGGAAGLF	545.778	0.01	60	7.6	6.05		Acetylation (Protein N-term)	0	0	0	0	0	0	0	0	0	0	0	0	0	0	0	0	0	0	2060	0	0	0	0	0	0	0	0	0	0	4720	0	0	0	0	0
HLIEHQRVH	584.817	0.01	60	0	7.03			0	0	0	0	0	0	0	0	0	0	0	0	0	0	0	0	0	0	0	0	0	0	0	6830	0	0	0	0	0	0	0	0	0	0	0
HLIKAQRH	1002.59	0.01	60	8.2	11			0	0	0	0	0	0	0	0	0	0	0	0	0	0	0	0	0	0	1460	0	0	0	0	5160	0	0	0	0	0	0	0	0	247	0	0
HHVGQ(+.98)TQLQ(+.98)	525.244	0.01	60	7.3	6.92		Deamidation (NQ)	0	0	0	0	0	0	0	0	0	0	0	0	0	0	0	0	0	0	0	0	0	0	6900	0	0	0	0	0	0	0	0	0	0	0	0
KGKEEKAKK	523.325	0.03	60	2.8	9.83			0	0	0	0	0	0	0	0	0	0	0	0	0	0	0	0	0	0	0	0	0	0	0	6910	0	0	0	0	0	0	0	0	0	0	0
QQQ(+.98)PLSAALRSLPAEKPPAPEAQPT	876.12	0.02	60	12.8	6.14		Deamidation (NQ)	0	0	0	0	0	0	0	0	0	0	0	0	0	0	0	0	0	0	0	0	2400	0	1430	0	0	0	0	0	0	0	0	0	0	0	3120
ILLLFKLLAT	572.885	0.01	60	6.3	8.75			0	0	0	0	0	0	0	0	0	0	0	0	0	0	0	0	0	0	0	0	0	0	0	0	5390	0	0	0	0	0	0	0	1690	0	0
RATANNQQPQQQQQQQ(+.98)QP	708.005	0.03	60	3	9.75		Deamidation (NQ)	0	0	0	0	0	0	0	0	0	0	0	0	0	0	0	0	0	0	0	0	0	0	7190	0	0	0	0	0	0	0	0	0	0	0	0
Q(-17.03)PPTVVPGGDLAKV	680.877	0.01	60	0	5.84	sp|P68366|TBA4A_HUMAN	Pyro-glu from Q	0	0	0	0	0	0	0	0	0	0	0	0	0	0	0	0	0	0	0	0	0	0	0	0	0	0	0	0	0	0	0	0	0	0	7240
NRSAEAQKLG	537.282	0.01	60	10.7	8.75			0	0	0	0	0	0	0	0	0	0	0	0	0	0	0	0	0	0	0	0	6890	0	0	0	0	0	0	0	0	807	0	0	0	0	0
NRVGKVEHGSVALPAIM	593.332	0.01	60	9	8.75			0	0	0	0	0	0	0	0	0	0	0	0	0	0	0	0	0	0	0	0	0	0	822	0	0	0	0	0	0	0	625	931	0	3490	1910
SSMDSQ(+.98)M(+15.99)LASGTMDSQMLASGTM	795.322	0.01	60	0.6	3.56		Deamidation (NQ); Oxidation (M)	0	0	0	0	0	0	0	0	0	0	0	0	0	0	0	0	0	0	0	0	0	2120	5660	0	0	0	0	0	0	0	0	0	0	0	0
TAINACEISN(+.98)GGCSA	706.302	0.02	60	15.6	4		Deamidation (NQ)	0	0	0	0	0	0	0	0	0	0	0	0	0	0	0	0	0	0	4310	0	0	0	0	0	3230	281	0	0	0	0	0	0	0	0	0
AKLQEQLKAVHQQLQVLSQVPFRKLNKKKEK	922.042	0.01	60	9.9	10.39			0	0	0	0	0	0	0	0	0	0	0	0	0	0	0	0	0	0	0	0	0	0	5920	0	0	0	0	851	0	0	0	0	0	1060	0
DSAGKNGLTPLHVAAHYDN(+.98)Q(+.98)KVALLLLEKGA	812.199	0.01	60	0.8	6.92		Deamidation (NQ)	0	0	0	0	0	0	0	0	0	0	0	0	0	0	0	0	0	0	0	0	0	0	0	1400	0	0	0	0	0	0	151	0	0	6280	0
Q(-17.03)APILAAIGLNFILFLNTVRV	756.093	0.01	60	8.6	9.75		Pyro-glu from Q	0	0	0	0	0	0	0	0	0	0	0	0	0	0	0	0	0	0	0	0	0	0	0	0	0	0	7170	0	0	0	0	0	685	0	0
Q(-17.03)LGLPGPPDVPDHA	698.347	0.03	60	4.3	4.2		Pyro-glu from Q	0	0	0	0	0	0	0	0	0	0	0	0	0	0	0	0	0	0	0	0	0	0	0	5800	0	2160	0	0	0	0	0	0	0	0	0
KFEASESPCLECPEHT	602.929	0.01	60	3	4.48			0	0	0	0	0	0	0	0	0	0	0	0	0	0	0	0	0	0	0	0	4020	0	0	0	0	0	0	0	0	0	0	0	0	0	3940
QVPQDDDARTDAVDSVVRDIQNTQCLLN(+.98)VEHLSAGCPHVT	872.798	0.01	60	7.2	4.27		Deamidation (NQ)	0	0	0	0	0	0	0	0	0	0	0	0	0	0	0	0	0	0	0	0	0	0	0	5600	0	0	0	0	0	0	0	2420	0	0	0
TSAGLKLILK	522.35	0.04	60	4.1	10			0	0	0	0	0	0	0	0	0	0	0	0	0	0	0	0	0	0	1560	0	1110	0	1540	0	0	0	0	1010	887	1240	0	0	736	0	0
KSRLSN(+.98)LIKLAQKVPT	599.698	0.03	60	8.9	11.26		Deamidation (NQ)	0	0	0	0	0	0	0	0	0	0	0	0	0	0	0	0	0	0	0	0	1850	0	0	0	0	0	2670	1690	0	2000	0	0	0	0	0
ELKLKDEECERL	752.882	0.03	60	3.1	4.59			0	0	0	0	0	0	0	0	0	0	0	0	0	0	0	0	0	0	0	0	4180	4100	0	0	0	0	0	0	0	0	0	0	0	0	0
SHTPSSQ	372.177	0.01	60	7.9	6.46			0	0	0	0	0	0	0	0	0	0	0	0	0	0	0	0	0	0	0	0	0	0	2880	5420	0	0	0	0	0	0	0	0	0	0	0
PGGGYGAA	649.289	0.01	60	7.5	5.95			0	0	0	0	0	0	0	0	0	0	0	0	0	0	0	0	0	0	0	0	0	0	1140	0	0	0	744	0	731	0	271	1250	936	2070	1340
N(+.98)PPPSTSKEPSAAAPTGAGG	449.463	0.04	60	4.9	6		Deamidation (NQ)	0	0	0	0	0	0	0	0	0	0	0	0	0	0	0	0	0	0	0	0	1190	0	2140	0	0	0	0	0	0	0	0	0	0	5330	0
KNNNCIP	802.385	0.01	60	7	8.22			0	0	0	0	0	0	0	0	0	0	0	0	0	0	0	0	0	0	0	0	0	0	0	0	0	0	5560	0	3140	0	0	0	0	0	0
TGPEGPHLG	432.709	0.06	60	4.8	5.21			0	0	0	0	0	0	0	0	0	0	0	0	0	0	0	0	0	0	0	0	0	0	8780	0	0	0	0	0	0	0	0	0	0	0	0
GRGSCPFG	390.68	0.07	60	5.9	8.25			0	0	0	0	0	0	0	0	0	0	0	0	0	0	0	0	0	0	0	0	0	0	0	0	818	0	0	0	5170	0	2840	0	0	0	0
RVVSLLLGAA	499.82	0.01	60	3.7	9.75			0	0	0	0	0	0	0	0	0	0	0	0	0	0	0	0	0	0	0	1260	7580	0	0	0	0	0	0	0	0	0	0	0	0	0	0
APPVAPERQPSWDPSPVS	639.658	0.01	60	18.9	4.37			0	0	0	0	0	0	0	0	0	0	0	0	0	0	0	0	0	0	0	0	0	0	0	0	0	0	0	0	0	0	0	0	0	0	8900
PASSPAPAPKFSPVTPKFTPVAS	761.077	0.01	60	0	10.02	sp|Q15942|ZYX_HUMAN		0	0	0	0	0	0	0	0	0	0	0	0	0	0	0	0	0	0	0	0	8960	0	0	0	0	0	0	0	0	0	0	0	0	0	0
VGAAGVVVGVGGAVGV	634.373	0.05	60	7.7	5.49			0	0	0	0	0	0	0	0	0	0	0	0	0	0	0	0	0	0	0	0	0	5360	0	0	632	0	0	2990	0	0	0	0	0	0	0
IFALEKTFEQTKYLAGPERARLAYSLGMTESQVKVWFQ(+.98)NRR	973.497	0.01	60	0	9.82		Deamidation (NQ)	0	0	0	0	0	0	0	0	0	0	0	0	0	0	0	0	0	0	0	0	0	9240	0	0	0	0	0	0	0	0	0	0	0	0	0
N(+.98)TQPRGPPASSPAPAPKF	607.646	0.01	60	11.2	11	sp|Q15942|ZYX_HUMAN	Deamidation (NQ)	0	0	0	0	0	0	0	0	0	0	0	0	0	0	0	0	0	0	0	0	0	0	5390	3850	0	0	0	0	0	0	0	0	0	0	0
GGGSKGN(+.98)KNGDNNSNHN(+.98)GEGNGQ(+.98)SGHSAAG	696.529	0.03	60	5.3	6.92		Deamidation (NQ)	0	0	0	0	0	0	0	0	0	0	0	0	0	0	0	0	0	0	0	0	0	0	0	0	0	0	6030	0	3240	0	0	0	0	0	0
TVVPPAPPAP	473.268	0.01	60	0	5.19			0	0	0	0	0	0	0	0	0	0	0	0	0	0	0	0	0	0	0	0	0	0	0	0	0	0	0	0	9400	0	0	0	0	0	0
ETQEKNPLPSKETIEQEKQAGES	650.814	0.02	60	5.5	4.48	sp|P62328|TYB4_HUMAN		0	0	0	0	0	0	0	0	0	0	0	0	0	0	0	0	0	0	0	0	0	0	9520	0	0	0	0	0	0	0	0	0	0	0	0
PGQEPPEHMAELQRNEQEQPLGQWHLS	792.123	0.02	60	0.6	4.62			0	0	0	0	0	0	0	0	0	0	0	0	0	0	0	0	0	0	0	0	0	0	0	6810	0	0	2760	0	0	0	0	0	0	0	0
YPVRVTDKTSI	639.857	0.01	60	8.8	8.59			0	0	0	0	0	0	0	0	0	0	0	0	0	0	0	0	0	0	0	0	0	9150	0	0	0	0	0	678	0	0	0	0	0	0	0
NLDFLKAVDTNRASVGQDSPEPR	843.758	0.01	60	1.2	4.68			0	0	0	0	0	0	0	0	0	0	0	0	0	0	0	0	0	0	0	3060	0	0	0	0	0	6790	0	0	0	0	0	0	0	0	0
FRPGVLSSRQLGLPGPPDVPDHAA	621.586	0.01	60	0	6.75			0	0	0	0	0	0	0	0	0	0	0	0	0	0	0	0	0	0	0	0	0	0	0	0	0	9870	0	0	0	0	0	0	0	0	0
WGHPCEMCPAQ(+.98)PQ(+.98)PC	562.538	0.03	60	7.9	5.24		Deamidation (NQ)	0	0	0	0	0	0	0	0	0	0	0	0	0	0	0	0	0	0	0	0	0	0	0	0	7480	0	0	0	0	0	0	0	2740	0	0
S(+42.01)DKPDM(+15.99)AEIEKFDKS	599.943	0.02	60	6.8	4.44	sp|P62328|TYB4_HUMAN	Acetylation (Protein N-term); Oxidation (M)	0	0	0	0	0	0	0	0	0	0	0	0	0	0	0	0	0	0	0	0	2000	0	5860	2430	0	0	0	0	0	0	0	0	0	0	0
LGEDAISSSM(+15.99)EIDQGEKNEDETSA	643.528	0.02	60	11.2	3.62		Oxidation (M)	0	0	0	0	0	0	0	0	0	0	0	0	0	0	0	0	0	0	0	0	0	0	7440	0	0	0	0	0	0	0	0	0	0	0	2890
QPPTVVPGGDLAKVQRA	578.326	0.02	60	0	8.75	sp|P68366|TBA4A_HUMAN		0	0	0	0	0	0	0	0	0	0	0	0	0	0	0	0	0	0	0	0	0	0	0	0	0	0	0	0	0	0	0	0	0	0	10400
TQEKNPLPSKETIEQE	624.312	0.02	60	4.5	4.49	sp|P62328|TYB4_HUMAN		0	0	0	0	0	0	0	0	0	0	0	0	0	0	0	0	0	0	0	0	0	0	6030	4540	0	0	0	0	0	0	0	0	0	0	0
EEEGEMYEDDEEE	544.839	0.01	60	8.4	3.21			0	0	0	0	0	0	0	0	0	0	0	0	0	0	0	0	0	0	8860	0	0	0	0	0	0	0	0	1830	0	0	0	0	0	0	0
E(-18.01)GFEVTNVTAST	618.771	0.01	60	16.1	3.8		Pyro-glu from E	0	0	0	0	0	0	0	0	0	0	0	0	0	0	0	0	0	0	5960	0	0	0	0	0	0	0	0	0	0	4960	0	0	0	0	0
DSNKEAQ(+.98)EDAEMDAE	561.531	0.02	60	4.5	3.66		Deamidation (NQ)	0	0	0	0	0	0	0	0	0	0	0	0	0	0	0	0	0	0	3910	0	0	0	0	0	886	0	0	0	6190	0	0	0	0	0	0
RIVRGSN(+.98)KIKFVVKKPELVISYLPPGMASKINTKALQSPKRPRSPGSNSKVPEI	1189.11	0.01	60	13	11.19		Deamidation (NQ)	0	0	0	0	0	0	0	0	0	0	0	0	0	0	0	0	0	0	5920	0	0	0	2900	0	0	0	0	0	0	0	0	0	0	0	2210
VKDGPRAHAYK	621.343	0.05	60	8.8	9.7			0	0	0	0	0	0	0	0	0	0	0	0	0	0	0	0	0	0	0	0	0	0	2460	2990	0	3140	2450	0	0	0	0	0	0	0	0
DLN(+.98)GN(+.98)SVSDEQ(+.98)DEGV	395.907	0.04	60	7.9	3.33		Deamidation (NQ)	0	0	0	0	0	0	0	0	0	0	0	0	0	0	0	0	0	0	0	0	0	0	6290	4770	0	0	0	0	0	0	0	0	0	0	0
EETGDHSMDDSSEDGKM(+15.99)ETKSDH	646.497	0.02	60	6.7	4.16		Oxidation (M)	0	0	0	0	0	0	0	0	0	0	0	0	0	0	0	0	0	0	3380	0	0	0	0	0	665	0	2280	0	682	0	0	0	4090	0	0
M(+15.99)LSSLLAGKVQPSDQVGKVIYKQFKQIRLT	848.735	0.01	60	2.6	10.17		Oxidation (M)	0	0	0	0	0	0	0	0	0	0	0	0	0	0	0	0	0	0	0	3890	0	7240	0	0	0	0	0	0	0	0	0	0	0	0	0
SDIFGSCEDDPV	428.501	0.02	60	2.6	3.37			0	0	0	0	0	0	0	0	0	0	0	0	0	0	0	0	0	0	9310	0	0	2050	0	0	0	0	0	0	0	0	0	0	0	0	0
SHALQLNNRQIR	483.938	0.02	60	7.6	12			0	0	0	0	0	0	0	0	0	0	0	0	0	0	0	0	0	0	0	0	0	0	0	0	0	0	0	0	0	0	0	0	0	11400	0
GASSSSGCN(+.98)N(+.98)SSSGGSGR	390.902	0.02	60	0	8.25		Deamidation (NQ)	0	0	0	0	0	0	0	0	0	0	0	0	0	0	0	0	0	0	0	11400	0	0	0	0	0	0	0	0	0	0	0	0	0	0	0
APTPAPASTIKIVPA	717.423	0.01	60	12.4	8.8			0	0	0	0	0	0	0	0	0	0	0	0	0	0	0	0	0	0	0	0	0	0	0	0	0	0	10600	0	0	0	904	0	0	0	0
SQPNQKLGHPEALSAGTGSPQPPSFT	878.429	0.02	60	9.4	6.47	sp|Q15942|ZYX_HUMAN		0	0	0	0	0	0	0	0	0	0	0	0	0	0	0	0	0	0	0	0	4140	0	3450	3960	0	0	0	0	0	0	0	0	0	0	0
KVKIHGI	397.772	0.01	60	14.8	10			0	0	0	0	0	0	0	0	0	0	0	0	0	0	0	0	0	0	0	0	8870	0	0	0	1920	0	0	0	818	0	0	0	0	0	0
GLAPLPGLPP	466.285	0.02	60	6.5	5.52			0	0	0	0	0	0	0	0	0	0	0	0	0	0	0	0	0	0	0	0	0	0	0	11800	0	0	0	0	0	0	0	0	0	0	0
Q(-17.03)LITGKEDAANNY	710.338	0.01	60	9.1	4.37	sp|P68366|TBA4A_HUMAN	Pyro-glu from Q	0	0	0	0	0	0	0	0	0	0	0	0	0	0	0	0	0	0	0	0	0	0	0	0	0	1420	0	0	0	3740	0	0	0	0	6980
M(+15.99)ENIKKAGFQ	591.313	0.04	60	7.1	8.35		Oxidation (M)	0	0	0	0	0	0	0	0	0	0	0	0	0	0	0	0	0	0	0	0	2250	0	3080	2970	0	0	0	0	2580	0	0	0	1290	0	0
PLILQLVHV	516.353	0.02	60	9	7.17			0	0	0	0	0	0	0	0	0	0	0	0	0	0	0	0	0	0	6130	4570	0	329	0	0	0	0	0	0	0	0	0	0	1200	0	0
GAVEGKEELPDENKSLE	615.3	0.01	60	3	4.14			0	0	0	0	0	0	0	0	0	0	0	0	0	0	0	0	0	0	0	0	0	0	11900	0	0	0	0	377	0	0	0	0	0	0	0
VACVGA	519.25	0.01	60	5.3	5.49			0	0	0	0	0	0	0	0	0	0	0	0	0	0	0	0	0	0	0	0	0	0	12300	0	0	0	0	0	0	0	0	0	0	0	0
TPDMNKNVA	495.241	0.06	60	4.7	5.5			0	0	0	0	0	0	0	0	0	0	0	0	0	0	0	0	0	0	0	0	0	0	12600	0	0	0	0	0	0	0	0	0	0	0	0
TGDQIRGCKAERN(+.98)CRNPELNPCSVNAQCIEERQGDVT	821.769	0.01	60	0.1	5.05		Deamidation (NQ)	0	0	0	0	0	0	0	0	0	0	0	0	0	0	0	0	0	0	0	0	0	0	0	0	0	7600	5000	0	0	0	0	0	0	0	0
LLLLLP	681.506	0.01	60	0	5.52			0	0	0	0	0	0	0	0	0	0	0	0	0	0	0	0	0	0	0	0	0	0	13400	0	0	0	0	0	0	0	0	0	0	0	0
SIYPAPQVSTAVVEPYN	917.957	0.04	60	4.5	4	sp|P68366|TBA4A_HUMAN		0	0	0	0	0	0	0	0	0	0	0	0	0	0	0	0	0	0	0	4240	0	0	0	0	0	0	0	0	0	0	0	0	3130	0	6260
AGAASPCAN(+.98)GCGPGAPS	463.53	0.03	60	1.8	5.55		Deamidation (NQ)	0	0	0	0	0	0	0	0	0	0	0	0	0	0	0	0	0	0	0	0	0	0	0	0	11900	0	0	0	2030	0	0	0	0	0	0
STPSFK	666.334	0.01	60	5.8	8.47			0	0	0	0	0	0	0	0	0	0	0	0	0	0	0	0	0	0	1240	0	0	0	0	0	0	0	1870	0	0	0	0	0	0	10900	0
EFRDPLM(+15.99)DTLM(+15.99)T	750.837	0.04	60	2.5	4.03		Oxidation (M)	0	0	0	0	0	0	0	0	0	0	0	0	0	0	0	0	0	0	6380	0	0	2490	0	0	2480	0	0	0	0	0	0	0	3040	0	0
Q(-17.03)LGLPGPPDVPDH	662.829	0.05	60	3.4	4.2		Pyro-glu from Q	0	0	0	0	0	0	0	0	0	0	0	0	0	0	0	0	0	0	0	0	3010	0	0	7540	0	4020	0	0	0	0	0	0	0	0	0
Q(-17.03)VRGWQATTAG	579.291	0.03	60	8.1	9.75		Pyro-glu from Q	0	0	0	0	0	0	0	0	0	0	0	0	0	0	0	0	0	0	0	0	0	0	0	0	0	0	0	0	0	0	0	0	0	5390	9260
REAVSGRYSLFCLGF	568.949	0.05	60	2.4	8.22			0	0	0	0	0	0	0	0	0	0	0	0	0	0	0	0	0	0	0	0	2180	0	4990	3010	0	0	0	0	0	0	0	886	0	0	4120
LSGEEEDDEPDCCND	557.19	0.01	60	0	3.19			0	0	0	0	0	0	0	0	0	0	0	0	0	0	0	0	0	0	15400	0	0	0	0	0	0	0	0	0	0	0	0	0	0	0	0
SPGAAT	503.248	0.01	60	7.4	5.24			0	0	0	0	0	0	0	0	0	0	0	0	0	0	0	0	0	0	0	0	6040	0	0	0	0	0	0	0	0	0	2310	7130	0	0	0
SSPAPAPKFSPVTPKFTPVAS	705.042	0.01	60	2.7	10	sp|Q15942|ZYX_HUMAN		0	0	0	0	0	0	0	0	0	0	0	0	0	0	0	0	0	0	0	0	8470	0	6090	0	0	1210	0	0	0	0	0	0	0	0	0
YQ(+.98)MHGT	737.282	0.02	60	7.9	6.74		Deamidation (NQ)	0	0	0	0	0	0	0	0	0	0	0	0	0	0	0	0	0	0	0	0	0	12600	0	0	3360	0	0	0	0	0	0	0	0	0	0
RRVSI	630.397	0.02	60	10.1	12			0	0	0	0	0	0	0	0	0	0	0	0	0	0	0	0	0	0	0	4330	0	5540	4270	0	0	0	0	0	0	0	0	0	1910	0	0
GPSLTNVTNSHSP	655.809	0.01	60	18.8	6.74			0	0	0	0	0	0	0	0	0	0	0	0	0	0	0	0	0	0	0	0	0	8960	0	0	0	0	0	0	0	0	0	0	0	7090	0
PPSSPGPPEIPPEATTFQ(+.98)SSEAPS	803.362	0.01	60	2.9	3.67		Deamidation (NQ)	0	0	0	0	0	0	0	0	0	0	0	0	0	0	0	0	0	0	0	0	0	0	0	10900	0	0	0	0	0	0	0	0	0	5680	0
STGLTGAANVA	481.243	0.04	60	3.7	5.24			0	0	0	0	0	0	0	0	0	0	0	0	0	0	0	0	0	0	0	0	0	0	0	13300	0	0	0	0	0	0	0	0	0	0	3920
CTLPPGPEPP	504.24	0.03	60	3.6	4			0	0	0	0	0	0	0	0	0	0	0	0	0	0	0	0	0	0	0	0	0	0	17500	0	0	0	0	0	0	0	0	0	0	0	0
QLQTAGGGGRGMLSPRAQ(+.98)EEEEKRDVFEFPLPKPPDD	817.407	0.03	60	9.4	4.56		Deamidation (NQ)	0	0	0	0	0	0	0	0	0	0	0	0	0	0	0	0	0	0	0	0	0	0	3750	0	0	0	0	0	0	0	0	0	0	13800	0
PPNLPILLP	487.309	0.02	60	0	5.96			0	0	0	0	0	0	0	0	0	0	0	0	0	0	0	0	0	0	0	0	0	0	0	17700	0	0	0	0	0	0	0	0	0	0	0
Q(-17.03)DGAELRPGFVLALHCDVDGQPAPQ(+.98)LHWHIQIPSGIVEITSP	905.863	0.01	60	0	4.77		Pyro-glu from Q; Deamidation (NQ)	0	0	0	0	0	0	0	0	0	0	0	0	0	0	0	0	0	0	0	0	0	0	0	0	0	17700	0	0	0	0	0	0	0	0	0
DKPDMAEIEKFDKSKLKKTET	497.063	0.04	60	4.2	6.3	sp|P62328|TYB4_HUMAN		0	0	0	0	0	0	0	0	0	0	0	0	0	0	0	0	0	0	0	0	9180	0	0	8560	0	0	0	0	0	0	0	0	0	0	0
S(+42.01)HSASEEASGSDSGSQSESEQGSDPGSGHGSE	773.789	0.01	60	7.8	4		Acetylation (Protein N-term)	0	0	0	0	0	0	0	0	0	0	0	0	0	0	0	0	0	0	0	0	0	0	0	0	0	0	0	0	638	0	2360	0	0	15100	0
PPTQT	543.283	0.01	60	3.7	5.96			0	0	0	0	0	0	0	0	0	0	0	0	0	0	0	0	0	0	0	0	0	0	0	18100	0	0	0	0	0	0	0	0	0	0	0
GKSSSYSKQFTSSTSYNRGDSTFESKSYKMADEAGSEADHEGTHST	994.839	0.03	60	3	5.46	sp|P02671|FIBA_HUMAN		0	0	0	0	0	0	0	0	0	0	0	0	0	0	0	0	0	0	3420	0	4340	0	0	3830	0	1860	1080	0	0	0	0	0	0	4040	0
PVEPVTSVTQPSELLQQKGVQYG	497.664	0.07	60	3.7	4.53			0	0	0	0	0	0	0	0	0	0	0	0	0	0	0	0	0	0	895	0	869	0	4420	8320	0	0	0	0	0	0	0	0	0	4280	0
PTCPN	531.221	0.06	60	2.8	5.91			0	0	0	0	0	0	0	0	0	0	0	0	0	0	0	0	0	0	0	0	0	0	0	0	0	7500	2290	0	0	0	1460	0	0	8040	0
VNPFRPGDSEPPPAPGA	852.918	0.01	60	8.6	4.37	sp|Q15942|ZYX_HUMAN		0	0	0	0	0	0	0	0	0	0	0	0	0	0	0	0	0	0	0	0	6100	0	7030	0	0	0	0	0	0	0	0	0	0	0	6250
DN(+.98)EADFLAEIEAL	725.822	0.01	60	0	3.39		Deamidation (NQ)	0	0	0	0	0	0	0	0	0	0	0	0	0	0	0	0	0	0	0	0	0	19700	0	0	0	0	0	0	0	0	0	0	0	0	0
TAVVP	486.278	0.08	60	11.2	5.19	sp|Q12766|HMGX3_HUMAN		0	0	0	0	0	0	0	0	0	0	0	0	0	0	0	0	0	0	0	0	0	0	18500	1590	0	0	0	0	0	0	0	0	0	0	0
GTLVSGGGKDRKLISWSGNY	524.529	0.01	60	0	9.7			0	0	0	0	0	0	0	0	0	0	0	0	0	0	0	0	0	0	0	0	0	0	0	0	0	0	0	0	0	0	0	0	0	20300	0
VPVPPGWN	865.452	0.03	60	3	5.49	sp|Q14686|NCOA6_HUMAN		0	0	0	0	0	0	0	0	0	0	0	0	0	0	0	0	0	0	0	0	9030	0	0	9750	0	0	0	0	0	0	0	2450	0	0	0
KEN(+.98)KKKQLILKLPVIFAKIQL	624.157	0.02	60	12.3	10.3		Deamidation (NQ)	0	0	0	0	0	0	0	0	0	0	0	0	0	0	0	0	0	0	4970	0	0	0	16000	0	0	0	0	0	598	0	0	0	0	0	0
YAVRGPIVQRALELEQELRQGVKK	927.534	0.01	60	8.2	9.69			0	0	0	0	0	0	0	0	0	0	0	0	0	0	0	0	0	0	0	0	0	0	0	0	0	8330	0	0	0	0	0	4040	0	0	9970
N(+.98)TQPRGPPASSPAPAPKFSPVTPKFTPVAS	758.898	0.01	60	4	11.17	sp|Q15942|ZYX_HUMAN	Deamidation (NQ)	0	0	0	0	0	0	0	0	0	0	0	0	0	0	0	0	0	0	0	0	11200	0	0	0	0	6910	4460	0	0	0	0	0	0	0	0
NEEGFF	742.302	0.03	60	7.1	3.79	sp|P02675|FIBB_HUMAN		0	0	0	0	0	0	0	0	0	0	0	0	0	0	0	0	0	0	20800	2280	0	0	0	0	0	0	0	0	0	0	0	0	0	0	0
S(+42.01)ETSRTAFGGRRAVPPNNSNAAEDDLPTVELQ	1147.89	0.02	60	1.4	4.51		Acetylation (Protein N-term)	0	0	0	0	0	0	0	0	0	0	0	0	0	0	0	0	0	0	0	0	0	1530	0	0	0	0	21600	0	0	0	0	0	0	0	0
PPKPPLPEGEVPPPRPPPPEEKDEEFPEQ	814.659	0.01	60	5	4.22	sp|P18206|VINC_HUMAN		0	0	0	0	0	0	0	0	0	0	0	0	0	0	0	0	0	0	0	0	7750	0	0	15500	0	0	1520	0	0	0	0	0	0	0	0
DEDEEEDDEEEED	813.764	0.02	60	2.6	3.05			0	0	0	0	0	0	0	0	0	0	0	0	0	0	0	0	0	0	19700	0	0	0	0	0	0	0	0	0	0	0	0	0	5160	0	0
TCPPAEPSENRR	678.806	0.06	60	2.8	5.81			0	0	0	0	0	0	0	0	0	0	0	0	0	0	0	0	0	0	7210	0	0	0	0	0	9780	0	0	0	0	0	0	0	7990	0	0
QGSPGDGGLQ(+.98)DQ(+.98)VGAWGLPGPTGPKG	609.527	0.02	60	12.4	4.21		Deamidation (NQ)	0	0	0	0	0	0	0	0	0	0	0	0	0	0	0	0	0	0	0	0	4140	0	10400	10800	0	0	0	0	0	0	0	0	0	0	0
GNPASGLPMVRGSPRVR	584.319	0.03	60	11	12.3			0	0	0	0	0	0	0	0	0	0	0	0	0	0	0	0	0	0	0	0	0	0	15100	0	0	0	0	0	0	4760	0	0	5570	0	0
QSGAAPGAPSLSFTVQV	808.902	0.03	60	11.5	5.52			0	0	0	0	0	0	0	0	0	0	0	0	0	0	0	0	0	0	0	2090	0	0	0	0	0	0	2110	5790	610	10400	0	0	0	0	6400
KFSPGAPGGSGSQPNQKLGHPEAL	591.053	0.02	60	9	8.6	sp|Q15942|ZYX_HUMAN		0	0	0	0	0	0	0	0	0	0	0	0	0	0	0	0	0	0	0	0	0	0	8630	6600	0	0	0	0	0	0	0	0	0	4070	8350
QAQALRVSLTPQ(+.98)QAQELGIPLTPQQAQA	747.399	0.01	60	7.8	6		Deamidation (NQ)	0	0	0	0	0	0	0	0	0	0	0	0	0	0	0	0	0	0	0	0	0	0	13400	0	0	0	0	0	0	0	0	0	0	0	15100
QALSTEAPLPATLEPRIV	636.017	0.03	60	7.2	4.53			0	0	0	0	0	0	0	0	0	0	0	0	0	0	0	0	0	0	0	0	0	18100	0	0	0	0	0	0	10500	0	0	0	0	0	0
YSKQFTSSTSYNRGDSTFESKSYKMADEAGSEADHEGTHST	905.591	0.02	60	13.6	5.01	sp|P02671|FIBA_HUMAN		0	0	0	0	0	0	0	0	0	0	0	0	0	0	0	0	0	0	0	0	4640	0	0	11100	0	9440	5070	0	0	0	0	0	0	0	0
Q(+.98)AIQ(+.98)MACQ(+.98)SLGEPGCT	547.215	0.01	60	6.4	4		Deamidation (NQ)	0	0	0	0	0	0	0	0	0	0	0	0	0	0	0	0	0	0	0	0	0	0	0	0	0	0	0	285	0	4990	0	0	25400	0	0
QKFEPSISM(+15.99)CHQGLM(+15.99)SFEGFARFLM(+15.99)DKENFASKNDESQENIKELQ	1064.06	0.04	60	8.1	4.84		Oxidation (M)	0	0	0	0	0	0	0	0	0	0	0	0	0	0	0	0	0	0	0	2700	0	0	0	0	0	0	0	0	0	0	0	0	2630	16200	9520
TVVPGGDLAKV	528.308	0.04	60	9.1	5.5	sp|P68366|TBA4A_HUMAN		0	0	0	0	0	0	0	0	0	0	0	0	0	0	0	0	0	0	0	0	0	0	13700	4660	0	0	0	0	0	0	0	0	0	8340	4850
NGADAVHFRV	543.28	0.07	60	7.6	6.74			0	0	0	0	0	0	0	0	0	0	0	0	0	0	0	0	0	0	0	0	0	0	27300	0	0	0	0	0	0	0	0	0	0	4800	0
M(+42.01)AGSGGLGGGAGGGQGAGAG	496.884	0.01	60	1.9	5.28		Acetylation (Protein N-term)	0	0	0	0	0	0	0	0	0	0	0	0	0	0	0	0	0	0	0	0	0	21400	0	0	0	0	0	9370	1860	0	0	0	0	0	0
RNIHVPELSLKS	464.95	0.01	60	5.9	8.75			0	0	0	0	0	0	0	0	0	0	0	0	0	0	0	0	0	0	0	0	0	0	0	18300	0	0	0	0	0	0	0	14700	0	0	0
PPCLGP	583.29	0.03	60	6.1	5.91			0	0	0	0	0	0	0	0	0	0	0	0	0	0	0	0	0	0	0	0	0	0	0	34400	0	0	0	0	0	0	0	0	0	0	0
NGDTGECTDNAY	420.491	0.06	60	1.3	3.49			0	0	0	0	0	0	0	0	0	0	0	0	0	0	0	0	0	0	27700	0	0	7860	0	0	0	0	0	0	0	0	0	0	5650	0	0
YGDPTN(+.98)GGQCT	557.203	0.01	60	6.8	3.8		Deamidation (NQ)	0	0	0	0	0	0	0	0	0	0	0	0	0	0	0	0	0	0	0	0	0	0	23900	17400	0	0	0	0	0	0	0	0	0	0	0
FEKKSLEDKTERELLESYIDG	633.076	0.02	60	0	4.49			0	0	0	0	0	0	0	0	0	0	0	0	0	0	0	0	0	0	0	0	0	0	0	0	0	43100	0	0	0	0	0	0	0	0	0
AGQSTEEEM(+15.99)YN(+.98)NET	540.534	0.02	60	0	3.58		Oxidation (M); Deamidation (NQ)	0	0	0	0	0	0	0	0	0	0	0	0	0	0	0	0	0	0	0	0	0	43900	0	0	0	0	0	0	0	0	0	0	0	0	0
GITYKPGDNYPVQFIPSTM(+15.99)AAAAASGLSPLQ(+.98)LQKGHVS	983.737	0.06	60	5.4	8.44		Oxidation (M); Deamidation (NQ)	0	0	0	0	0	0	0	0	0	0	0	0	0	0	0	0	0	0	0	7040	0	9340	0	0	0	0	0	0	672	0	11700	0	15800	0	0
TPPITTIAAAPPPSVTVGGSLS	1017.56	0.02	60	5.6	5.19			0	0	0	0	0	0	0	0	0	0	0	0	0	0	0	0	0	0	0	0	0	15000	24100	0	0	0	0	0	8100	0	0	0	0	0	0
AAQ(+.98)N(+.98)FFCAGCGTP	644.746	0.09	60	7.4	5.55		Deamidation (NQ)	0	0	0	0	0	0	0	0	0	0	0	0	0	0	0	0	0	0	21600	0	0	7190	0	0	3130	0	0	0	0	0	4110	0	12300	0	0
NNSNAAEDDLPTVELQGVVPR	1119.55	0.06	60	2.9	3.92			0	0	0	0	0	0	0	0	0	0	0	0	0	0	0	0	0	0	0	0	9960	0	3760	29500	0	0	7280	0	0	0	0	0	0	0	0
SKAATDAQDAN(+.98)QCC	476.177	0.06	60	2.2	4.21		Deamidation (NQ)	0	0	0	0	0	0	0	0	0	0	0	0	0	0	0	0	0	0	26600	0	0	0	0	0	18400	0	0	0	0	0	0	0	10900	0	0
ETEEEAM(+15.99)TVQADIIPSPTDTSCRQ	667.544	0.01	60	4.9	3.77		Oxidation (M)	0	0	0	0	0	0	0	0	0	0	0	0	0	0	0	0	0	0	38700	4580	0	0	0	0	0	0	15500	0	0	0	0	0	0	0	0
SAPLPAQ(+.98)GPG	448.214	0.09	60	7.8	5.24		Deamidation (NQ)	0	0	0	0	0	0	0	0	0	0	0	0	0	0	0	0	0	0	0	0	0	0	39900	20700	0	0	0	0	0	0	0	0	0	0	0
GPGHPRTYLTYRR	525.285	0.13	60	4.8	10.9			0	0	0	0	0	0	0	0	0	0	0	0	0	0	0	0	0	0	0	0	0	0	38100	0	0	12400	19500	0	0	0	0	0	0	0	0
TN(+.98)VLGMM(+15.99)TAILGVFLYNKTKYDAN(+.98)QQ	738.621	0.01	60	0	8.1		Deamidation (NQ); Oxidation (M)	0	0	0	0	0	0	0	0	0	0	0	0	0	0	0	0	0	0	73400	0	0	0	0	0	0	0	0	0	0	0	0	0	0	0	0
PPGPVTT	668.35	0.02	60	3.9	5.96			0	0	0	0	0	0	0	0	0	0	0	0	0	0	0	0	0	0	0	0	0	0	44400	32700	0	0	0	0	0	0	0	0	0	0	0
E(-18.01)EEEDQNEDQ(+.98)DVPD	837.293	0.02	60	5.2	3.17		Pyro-glu from E; Deamidation (NQ)	0	0	0	0	0	0	0	0	0	0	0	0	0	0	0	0	0	0	31900	0	0	56900	0	0	0	0	0	0	0	0	0	0	41500	0	0
KKARVLSKKEERLKKHIKK	783.18	0.01	60	3.1	10.79			0	0	0	0	0	0	0	0	0	32.4	0	0	0	0	0	0	0	0	0	0	0	0	0	0	0	0	0	0	0	0	0	0	0	0	0
AGAAGPAGNPGADG	541.736	0.01	22.55	0.8	3.8			0	0	0	0	0	0	0	0	0	0	0	48.1	0	0	0	0	0	0	0	0	0	0	0	0	0	0	182	0	0	0	0	0	0	0	0
KVGPP	497.299	0.01	60	5.1	8.75	sp|P25067|CO8A2_HUMAN		0	0	0	0	0	0	0	0	0	56.9	0	0	0	0	0	0	0	0	0	0	0	0	272	0	0	0	0	0	0	0	0	0	0	0	0
AAAIAAVNAL	884.538	0.01	60	8.9	5.57			0	0	0	0	0	0	0	0	0	64.2	0	0	0	0	0	0	0	0	1160	0	0	0	0	310	0	0	0	0	0	0	0	0	0	0	0
QLLLPLSD	898.52	0.01	60	9.9	3.8			0	0	0	0	0	0	0	0	0	68.5	0	0	0	0	0	0	0	0	0	0	0	0	0	0	0	0	0	0	0	0	0	0	0	0	0
EEEDEEEEEDDDDDEL	496.671	0.01	31.57	0	2.99			0	0	0	0	0	0	0	0	0	0	79.1	0	0	0	0	0	0	0	0	0	0	0	0	0	0	0	0	0	0	0	0	0	0	0	0
LIAARVKKLKETLV	528.024	0.01	52.1	0	10.29			0	0	0	0	0	0	0	0	0	0	105	0	0	0	0	0	0	0	0	0	0	0	0	0	0	0	0	0	0	0	0	0	0	0	0
GLVLGLLGPL	476.321	0.01	60	8	5.52			0	0	0	0	0	110	0	0	0	0	0	0	0	0	0	0	0	0	0	0	0	754	0	0	0	0	0	403	1640	0	0	0	0	0	0
GVVAGVVAVALLIALAVLVR	635.09	0.03	60	8	9.75			0	0	0	0	0	0	0	0	0	112	0	0	0	0	0	0	0	0	0	0	0	0	0	0	0	0	0	0	0	0	0	0	0	0	0
EAFCP	566.226	0.01	60	5.3	4			0	0	0	0	0	0	0	0	0	0	0	0	0	0	0	115	0	0	0	0	0	0	0	0	0	0	0	0	121	0	0	0	0	0	0
KGKCRGVR	903.502	0.01	60	0	11.01			116	0	0	0	0	0	0	0	0	0	0	0	0	0	0	0	0	0	0	0	0	0	0	0	0	0	0	0	0	0	0	0	0	0	0
HPAAK	523.308	0.01	60	11.2	8.76			0	0	0	0	0	0	0	0	0	129	0	0	0	0	0	0	0	0	0	0	0	0	0	0	0	0	0	0	0	0	0	0	0	0	0
PPAGKPAM(+15.99)APKRKGGLKLNAICAKLSRQ(+.98)VVVEKR	908.041	0.01	60	10	11.17		Oxidation (M); Deamidation (NQ)	0	0	0	0	0	0	0	0	0	144	0	0	0	0	0	0	0	0	1400	0	112	0	0	0	0	0	0	0	170	553	0	34	0	0	0
HKAQ(+.98)Q(+.98)SLELIQ	648.844	0.02	60	12.2	6.75		Deamidation (NQ)	0	0	0	0	0	153	0	0	0	0	0	0	0	0	0	0	0	0	0	0	0	5030	0	0	0	0	0	0	0	0	0	0	0	0	0
PCTSTAIASP	947.453	0.01	60	0	5.91			0	0	0	0	0	0	0	0	159	0	0	0	0	0	0	0	0	0	0	0	0	0	0	0	0	0	0	0	0	0	0	0	0	0	0
LLDIVSS	746.419	0.03	60	14.5	3.8			0	0	0	0	0	0	0	0	0	177	0	0	0	0	0	0	0	0	0	0	0	0	0	0	0	0	0	0	0	0	0	0	0	0	0
TCLEAQ(+.98)GGPSSP	383.17	0.03	60	3.4	4		Deamidation (NQ)	0	0	0	182	0	0	0	0	0	0	0	0	0	0	0	0	0	0	207	0	0	0	0	0	0	0	0	0	0	0	0	0	0	0	0
AKLIVPNSTA	507.31	0.01	60	11.8	8.8			0	0	0	0	0	0	0	0	0	0	0	0	0	186	0	0	0	0	0	0	0	0	0	1370	0	0	0	0	0	0	0	0	0	0	0
KESNVLHPN(+.98)GECPVKSEPTEPGD	1232.54	0.02	60	5.7	4.57		Deamidation (NQ)	0	0	0	0	0	0	0	0	0	0	0	0	189	0	0	0	0	0	0	0	0	218	0	0	0	0	0	0	0	0	0	0	171	0	0
QSSGHGRQGSGSGHSP	508.23	0.04	60	3.5	9.76			0	0	0	190	0	0	0	0	0	0	0	0	0	0	0	0	0	0	0	0	469	0	587	0	0	0	0	0	0	0	0	0	0	0	0
RQEDVGFRG	532.265	0.01	60	14.4	6.07			0	0	0	0	0	0	0	0	0	195	0	0	0	0	0	0	0	0	0	0	0	0	0	0	0	0	0	0	0	0	0	0	0	0	6750
QVVTQAMEYVRSGCRN(+.98)PPPQPVDWNNDYC	1123.15	0.01	60	0	4.56		Deamidation (NQ)	0	0	0	0	0	0	210	0	0	0	0	0	0	0	0	0	0	0	0	0	0	0	0	0	0	0	0	0	0	0	0	0	0	0	0
PHQ(+.98)APLGD	418.201	0.01	60	6.4	5.08		Deamidation (NQ)	0	219	0	0	0	0	0	0	0	0	0	0	0	0	0	0	0	0	0	0	0	0	0	0	0	0	0	0	0	0	0	0	0	0	0
Q(-17.03)PISVKVISV	1052.64	0.01	60	12.8	8.75		Pyro-glu from Q	0	0	0	0	193	0	45.3	0	0	0	0	0	0	0	0	0	0	0	232	76.7	0	0	0	0	92.8	0	0	0	12.7	0	0	0	131	0	0
SGLCQ(+.98)IVGCDHQLGSTVKEDNCGVCNGDGSTCRLVRG	757.132	0.01	60	0.6	5.41		Deamidation (NQ)	0	0	0	0	0	0	0	0	0	0	0	0	0	240	0	0	0	0	0	0	0	0	0	0	0	0	0	0	0	0	0	0	0	0	0
Q(-17.03)Q(+.98)PPQAPTPQAAAPPQ(+.98)	537.924	0.04	60	5.4	5.52		Pyro-glu from Q; Deamidation (NQ)	0	0	0	0	0	241	0	0	0	0	0	0	0	0	0	0	0	0	2730	0	0	0	0	0	0	0	0	0	188	0	546	0	0	0	0
HIAHKQGL	903.525	0.01	60	10.3	8.76			0	0	0	0	0	0	0	0	0	242	0	0	0	0	0	0	0	0	0	0	383	0	0	0	0	0	0	0	0	0	0	0	0	0	0
REKPRVQEKQHPVPPPAQNQN	496.265	0.04	60	6.5	9.99	sp|Q15942|ZYX_HUMAN		0	0	0	0	0	0	0	0	0	0	0	0	0	0	0	0	245	0	0	0	0	0	0	0	0	0	0	0	0	0	0	203	0	0	545
IRPHITT	837.498	0.01	60	12	9.76			0	0	0	0	0	0	0	0	0	246	0	0	0	0	0	0	0	0	0	889	0	0	0	0	183	0	0	0	0	0	0	0	0	0	0
AGGGCSGASPGKAPSM(+15.99)DGLGSSCPAS	556.986	0.03	60	8.2	5.86		Oxidation (M)	0	0	0	0	0	0	0	257	0	0	0	0	0	0	0	0	0	0	0	0	0	0	0	0	0	0	0	0	0	0	0	0	0	0	0
ELAPA	500.264	0.01	60	13.7	4			0	0	0	0	0	0	0	0	0	0	257	0	0	0	0	0	0	0	0	0	0	0	0	0	0	0	0	0	0	0	0	0	0	0	0
NTAGSFSCKDCDGGYRPSPLGDSCEDVDECEDPQSSCLGGECKN(+.98)TVGS	984.787	0.01	60	5	3.89		Deamidation (NQ)	0	0	0	0	0	0	0	0	0	0	0	0	262	0	0	0	0	0	0	417	0	0	0	0	750	0	0	0	0	0	0	0	0	0	0
EQLTLVN(+.98)N(+.98)V	516.275	0.02	60	16.6	4		Deamidation (NQ)	0	0	0	0	0	0	0	0	0	0	271	0	0	0	0	0	0	0	0	0	0	0	0	0	0	0	0	0	0	0	0	0	0	0	0
Q(+.98)RPVVKT	828.48	0.01	60	10	11		Deamidation (NQ)	0	0	0	0	0	0	0	0	0	273	0	0	0	0	0	0	0	0	0	0	0	0	0	0	0	0	0	0	0	0	0	0	0	0	0
AGFEIFDLN(+.98)SFEQ(+.98)LCIN(+.98)YTNEKLQ	947.087	0.01	60	3.7	4		Deamidation (NQ)	0	0	277	0	0	0	0	0	0	0	0	0	0	0	0	0	0	0	0	0	0	0	0	0	0	0	0	0	0	0	0	0	0	0	0
KVVGVPVGSALPSTVKQ(+.98)A	869.52	0.01	60	11.1	10		Deamidation (NQ)	0	0	0	0	0	0	0	0	0	0	0	0	284	0	0	0	0	0	0	0	310	0	0	0	0	0	0	0	0	0	0	0	0	0	0
KSGSLRR	803.48	0.02	60	9.1	12.01			0	0	0	0	0	0	0	0	0	0	0	0	0	0	74.6	211	0	0	0	625	0	0	0	0	898	0	0	0	0	0	0	0	0	0	0
TPGTT	476.244	0.01	60	0	5.19			0	0	0	0	0	0	0	0	0	289	0	0	0	0	0	0	0	0	0	0	0	0	0	0	0	0	0	0	0	0	0	0	0	0	0
GGLRPN	613.344	0.01	60	7.9	9.75			0	0	0	0	0	0	0	0	0	0	0	0	0	0	0	305	0	0	0	0	2230	1210	0	3370	0	0	0	0	0	0	0	649	0	0	1890
GSARIPFR	903.512	0.01	60	6.8	12			0	0	0	0	0	0	0	0	0	315	0	0	0	0	0	0	0	0	0	0	0	0	0	0	0	0	0	0	0	0	0	0	0	0	0
EVLSPTVKGKL	1170.71	0.02	60	7.9	8.69			0	0	0	0	0	323	0	0	0	0	0	0	0	0	0	0	0	0	903	181	0	0	0	103	0	472	268	0	0	0	661	303	231	0	0
PGSSGTGGTATWKPGSSGP	844.898	0.02	60	5.5	9.18	sp|P02671|FIBA_HUMAN		0	0	0	0	0	0	0	325	0	0	0	0	0	0	0	0	0	0	0	0	0	0	0	0	0	0	0	0	0	0	0	0	0	0	0
RALLPLC	785.467	0.02	60	9.2	8.25			0	0	0	0	0	0	0	0	0	328	0	0	0	0	0	0	0	0	0	0	142	499	0	0	0	0	0	147	1190	0	261	0	0	0	0
LKGIPTLVY	1003.61	0.01	60	6.4	8.59			0	0	293	0	0	0	0	0	0	0	0	0	0	0	45.8	0	0	0	185	0	0	0	0	0	0	0	5.3	0	4.45	0	0	0	181	0	0
FM(+15.99)CCTT	721.244	0.01	60	11.8	5.51		Oxidation (M)	0	42.4	0	0	0	0	0	0	126	0	0	0	0	171	0	0	0	0	0	0	0	0	0	0	0	0	0	0	0	0	0	0	0	0	0
PPLAPAAAVPG	960.578	0.01	60	8.2	5.96			0	0	0	0	0	0	0	0	0	341	0	0	0	0	0	0	0	0	0	1080	0	0	0	0	0	0	0	0	0	2840	0	0	0	0	0
KFNPGA	633.329	0.04	60	7.4	8.75			0	0	0	0	0	0	0	344	0	0	0	0	0	0	0	0	0	0	617	0	0	0	0	0	0	0	0	0	0	0	0	0	0	0	0
GLYPVLVIDS	1075.62	0.01	60	12	3.8			0	0	0	0	0	68.4	0	0	0	280	0	0	0	0	0	0	0	0	0	0	0	0	0	0	0	0	65.9	0	72.1	0	0	0	0	0	0
QNSKPSVPVSIPKSKEK	618.345	0.01	60	11.1	10			0	0	0	0	0	0	0	0	0	0	352	0	0	0	0	0	0	0	0	0	0	0	0	0	0	0	0	0	0	0	166	0	0	0	0
YKMADEAGSEADHEGTHST	509.712	0.01	60	0	4.49	sp|P02671|FIBA_HUMAN		0	0	0	0	0	0	0	0	0	0	0	0	0	356	0	0	0	0	0	0	0	0	0	0	0	0	0	0	0	0	0	0	0	0	0
PPPLFGKK	883.531	0.03	60	8.9	10.02			0	0	0	0	0	0	0	0	0	289	0	0	0	0	0	0	67.1	0	0	750	0	0	303	331	0	0	0	0	184	0	0	0	87	0	0
SQ(+.98)GMDSKPWYCDK	773.311	0.05	60	6.2	5.68		Deamidation (NQ)	0	88.7	0	210	0	0	0	0	0	0	0	0	0	60.9	0	0	0	0	0	173	95.2	85.6	385	0	0	60.6	185	0	111	50.9	41.8	0	109	0	207
PRGLGSFEYQDTT	490.904	0.03	60	2.9	4.37			0	0	0	0	0	0	0	0	0	0	0	0	0	0	0	378	0	0	0	0	0	0	0	0	0	0	0	0	0	491	0	0	0	0	0
APTDVLDSLTTIPEL	792.919	0.01	60	0	3.49			0	0	0	0	0	0	386	0	0	0	0	0	0	0	0	0	0	0	0	0	0	0	0	0	0	0	0	0	0	0	0	0	0	0	0
DLQLVAASAPPPFSGAAF	586.979	0.01	60	6	3.8			0	0	0	0	0	0	0	0	0	0	0	0	390	0	0	0	0	0	0	0	0	0	0	0	0	0	0	0	0	0	0	0	0	0	0
SLLPGGSEGGR	515.267	0.01	60	0	5.72			0	0	0	0	0	0	0	0	0	0	0	0	390	0	0	0	0	0	0	0	0	0	0	0	0	0	0	0	0	0	0	0	0	0	0
EPNGEPN(+.98)GVTVTAEAVSQ(+.98)ASSHPENSEEEECMGAAAAVGPA	1007.18	0.01	60	0	3.77		Deamidation (NQ)	0	0	0	0	0	0	0	0	0	0	0	0	0	0	392	0	0	0	0	0	0	0	0	0	0	0	0	0	0	0	0	0	0	0	0
Q(-17.03)SLQEETVRKGP	677.851	0.02	60	5	6.14		Pyro-glu from Q	0	0	0	0	0	0	0	392	0	0	0	0	0	0	0	0	0	0	0	0	0	0	0	0	0	0	0	0	0	0	0	0	0	2240	0
DEAGSEADHEGTHST	514.868	0.07	60	2.8	4.17	sp|P02671|FIBA_HUMAN		0	0	0	0	0	0	0	0	0	0	0	0	0	397	0	0	0	0	0	0	1340	0	567	975	0	0	0	0	0	0	0	0	0	409	0
RAGSGKAK	774.447	0.02	60	4.6	11.17			0	0	0	0	0	0	0	0	0	406	0	0	0	0	0	0	0	0	0	0	0	0	0	0	0	0	0	0	0	0	0	0	0	0	0
KACQVTQ(+.98)SRN	568.293	0.01	60	9.5	9.51		Deamidation (NQ)	0	0	0	0	0	0	0	0	0	0	0	0	0	0	0	406	0	0	0	0	666	0	0	0	551	0	0	0	230	0	0	0	237	0	0
KLVVPNK	399.262	0.01	60	4.9	10			0	0	0	0	0	0	0	0	0	0	407	0	0	0	0	0	0	0	0	0	0	0	0	3170	0	0	0	0	0	0	0	0	0	2190	0
SSM(+15.99)CQ	571.186	0.01	60	0	5.24		Oxidation (M)	0	0	0	0	0	0	0	413	0	0	0	0	0	0	0	0	0	0	0	0	0	0	0	0	0	0	0	0	0	0	0	0	0	0	0
VLAIKGRAT	464.803	0.01	60	13	11			0	0	0	0	0	0	0	0	0	0	0	0	413	0	0	0	0	0	0	0	0	0	0	0	0	0	0	0	431	0	0	0	0	0	0
ATKVV	517.323	0.01	60	7	8.8			0	0	0	0	0	0	0	0	0	0	0	0	0	0	0	417	0	0	0	0	0	0	0	0	1910	0	1910	660	0	0	0	0	0	0	0
GPPGLPVPGQAGAP	1214.64	0.01	60	0	5.52			0	0	0	0	0	0	0	0	0	0	0	0	0	0	0	0	434	0	0	0	0	0	0	0	0	0	0	0	0	0	0	0	0	0	0
VIPAKIQQ(+.98)VA	534.328	0.01	60	7	8.72		Deamidation (NQ)	0	0	0	0	438	0	0	0	0	0	0	0	0	0	0	0	0	0	0	0	778	0	0	347	0	0	0	0	307	131	123	0	0	0	697
PPGARGLAL	851.503	0.01	60	4	10.18			0	0	0	0	0	0	0	0	0	41.8	0	0	0	0	0	397	0	0	0	1900	0	0	0	0	0	0	0	0	1350	0	0	0	0	0	0
CPTEPG	603.243	0.01	60	0	4			0	0	0	440	0	0	0	0	0	0	0	0	0	0	0	0	0	0	0	0	0	0	0	0	0	0	0	0	0	0	0	0	0	0	0
Q(+.98)AMIQ(+.98)AAGKLVLIDKLLPKLIAGGHK	546.529	0.01	60	0	10		Deamidation (NQ)	0	0	0	0	0	0	0	0	0	0	443	0	0	0	0	0	0	0	0	0	0	0	0	0	0	0	0	0	0	0	0	0	0	0	0
SPCSCDCF	431.129	0.02	60	12	3.8			0	0	0	0	456	0	0	0	0	0	0	0	0	0	0	0	0	0	3480	0	0	0	0	0	0	0	0	0	0	0	2120	0	0	0	0
KDLEDAAPVTT	580.291	0.01	60	7.2	4.03			0	0	0	0	0	0	0	0	0	457	0	0	0	0	0	0	0	0	0	0	3190	0	0	602	0	0	0	0	0	0	0	0	0	636	3290
SREMAARALVPFVMI	564.318	0.01	60	10	9.31			0	0	0	243	0	0	219	0	0	0	0	0	0	0	0	0	0	0	0	0	821	0	866	0	0	0	0	0	0	0	0	0	0	0	0
QGCGD	479.16	0.01	60	12.5	3.8			0	463	0	0	0	0	0	0	0	0	0	0	0	0	0	0	0	0	0	0	0	0	0	0	0	0	0	0	0	0	0	0	0	0	0
MPPGG	458.206	0.01	60	0	5.28			0	0	0	0	0	0	0	0	0	0	0	0	0	466	0	0	0	0	0	0	0	0	0	0	0	0	0	0	0	0	0	0	0	0	0
LAEGGGV	602.298	0.02	60	2.6	4	sp|P02671|FIBA_HUMAN		0	469	0	0	0	0	0	0	0	0	0	0	0	0	0	0	0	0	0	0	0	0	0	0	0	0	0	303	0	0	0	0	0	0	0
YTAIAIIVAT	1035.62	0.01	60	9	5.52			0	0	209	0	14.3	143	0	0	0	105	0	0	0	0	0	0	0	0	0	66.3	0	219	0	0	57	0	0	0	184	0	0	0	0	0	0
N(+.98)APLKSN(+.98)DSETSSVAQ(+.98)SGSESK	446.001	0.01	60	10.5	4.68		Deamidation (NQ)	0	0	0	0	0	0	0	0	474	0	0	0	0	0	0	0	0	0	0	0	56.2	0	0	0	0	0	0	0	0	0	0	0	0	0	0
TFRGKVKIIRNKKREGLIRARLIGA	579.571	0.01	60	0.4	12.19			0	0	0	0	0	0	0	0	0	0	489	0	0	0	0	0	0	0	0	0	0	0	0	0	0	0	0	0	0	0	0	0	156	0	0
TAAPGGGA	601.305	0.01	60	13	5.19			0	0	0	0	0	0	0	498	0	0	0	0	0	0	0	0	0	0	0	0	0	0	0	0	0	0	0	0	0	0	0	0	0	0	0
GGSCSQ(+.98)AASSNSAQG	438.167	0.01	60	0	5.52		Deamidation (NQ)	0	0	0	0	0	499	0	0	0	0	0	0	0	0	0	0	0	0	0	0	0	0	0	0	0	0	0	0	0	0	0	0	0	0	0
NLLLGV	628.4	0.01	60	6.3	5.52			0	0	0	0	0	0	0	0	0	0	0	501	0	0	0	0	0	0	0	0	0	0	0	11300	0	0	0	0	0	0	0	0	0	993	2510
VAGIPAVKLG	462.818	0.03	60	12.3	8.72			0	0	0	0	0	0	502	0	0	0	0	0	0	0	0	0	0	0	0	737	0	44.5	0	0	3750	1150	357	0	0	0	2160	0	0	0	196
GKARL	544.363	0.01	60	0	11			0	0	0	0	0	0	0	0	0	0	0	0	0	0	0	0	0	505	0	0	0	0	0	0	0	0	0	0	0	0	0	0	0	0	0
FALAI	534.325	0.02	60	4.3	5.52			0	0	0	0	0	0	0	0	0	509	0	0	0	0	0	0	0	0	0	0	0	198	0	0	0	0	0	0	0	0	0	0	0	0	0
DKGAN	504.237	0.06	60	6.3	5.84			0	0	0	0	0	0	0	0	0	510	0	0	0	0	0	0	0	0	0	2150	0	0	375	393	0	0	0	0	1110	0	0	2680	0	0	0
FCGIVLHNAQL	1214.6	0.01	60	0	6.73			514	0	0	0	0	0	0	0	0	0	0	0	0	0	0	0	0	0	0	0	0	0	0	0	0	0	0	0	0	0	0	0	0	0	0
SQEQ(+.98)LAQ(+.98)VAANA	616.295	0.03	60	12.1	4		Deamidation (NQ)	0	0	0	0	0	0	0	0	0	0	0	0	0	0	0	517	0	0	1840	0	0	0	0	0	0	0	0	0	0	0	0	0	0	0	0
SAPNH	525.253	0.01	60	5.2	6.46			0	0	0	0	0	0	0	0	0	517	0	0	0	0	0	0	0	0	0	0	0	0	0	0	0	0	0	0	0	0	0	0	0	6810	0
GAN(+.98)ENSAENM(+15.99)Q	591.222	0.04	60	4.3	3.79		Deamidation (NQ); Oxidation (M)	0	0	0	0	0	0	0	0	0	0	0	0	0	0	0	518	0	0	0	0	0	0	0	0	0	0	0	0	0	0	0	0	0	0	0
TDYSCNA	773.274	0.01	60	0	3.8			0	0	0	0	0	0	0	0	0	0	0	520	0	0	0	0	0	0	0	0	0	0	0	0	0	0	0	0	0	0	0	0	0	0	0
PPPLLPL	746.49	0.01	60	0	5.96			522	0	0	0	0	0	0	0	0	0	0	0	0	0	0	0	0	0	0	0	0	0	0	0	0	0	0	0	0	0	0	0	0	0	0
EALLT	546.314	0.01	60	0	4			0	0	0	0	0	0	0	0	0	525	0	0	0	0	0	0	0	0	0	0	0	0	0	0	0	0	0	0	0	0	0	0	0	0	0
GPGRRGGR	812.484	0.01	60	13	12.3			0	0	0	0	0	0	0	0	0	379	0	0	0	0	0	156	0	0	827	0	0	0	0	0	0	0	0	17.7	0	0	0	0	0	0	0
E(-18.01)LKPAGITT	911.537	0.02	60	6.3	6.1		Pyro-glu from E	0	0	0	0	0	0	0	304	0	232	0	0	0	0	0	0	0	0	0	2590	0	0	1050	0	141	0	0	0	0	0	0	0	0	0	1360
EGDTSAC	682.236	0.02	60	3.6	3.67			0	0	0	0	0	0	0	0	0	0	0	0	285	92.4	0	0	160	0	0	0	0	0	0	0	0	0	0	0	0	0	0	0	0	0	0
HGVLHRRR	1030.63	0.04	5.61	7.6	12.3			0	0	0	93.7	0	0	0	0	0	112	0	0	0	0	0	0	180	152	17.1	232	0	0	429	0	382	0	0	0	187	0	0	0	0	162	0
GAGSGGGGAAGAGAGSAGGGGFM(+15.99)FPVAGGIRPPQAGLMPMQQQGFPMVSVMQPNMQ(+.98)GIMGM(+15.99)NY	1198.55	0.01	60	0	8.75		Oxidation (M); Deamidation (NQ)	0	0	0	0	0	0	0	0	0	0	0	0	0	0	0	538	0	0	0	0	0	0	0	0	0	0	0	0	0	0	0	0	0	0	0
E(-18.01)NSETFA	779.313	0.01	60	10.6	3.8		Pyro-glu from E	0	0	0	0	0	0	0	0	0	0	0	0	0	0	0	538	0	0	0	0	0	0	0	0	0	0	0	0	1640	0	0	0	0	0	0
GAVINIKGAIF	1102.68	0.02	60	10	8.75			0	0	238	95.2	0	202	2.88	0	0	0	0	0	0	0	0	0	0	0	348	0	59.6	183	0	1190	364	37.9	74.4	0	0	0	0	0	137	0	0
KSKVLAV	744.489	0.01	60	0	10			0	0	0	0	0	540	0	0	0	0	0	0	0	0	0	0	0	0	0	0	0	0	0	0	0	0	0	0	0	0	0	0	0	0	0
ANRAKNLAIT	536.33	0.01	60	7.9	11			0	0	0	0	0	0	0	545	0	0	0	0	0	0	0	0	0	0	0	0	0	0	0	0	0	0	0	0	0	0	0	0	0	765	0
KLIESKPKVLFEL	772.465	0.02	60	9.9	8.5			0	0	0	0	0	0	91.3	0	456	0	0	0	0	0	0	0	0	0	0	0	0	0	0	0	0	0	427	0	522	72.2	631	0	0	0	2420
VTGGGRGIGAGI	1014.61	0.01	60	5.7	9.72			0	0	0	0	0	0	0	0	0	461	0	0	0	0	0	91.1	0	0	485	0	0	0	0	0	0	0	0	0	0	0	0	0	0	0	0
HTGERPYRCGDCGKAFTQSS	550.754	0.01	60	0	8.06			0	0	0	0	0	0	0	553	0	0	0	0	0	0	0	0	0	0	0	0	0	0	0	0	0	0	0	0	0	0	0	0	0	0	0
PVTVTRTTITTTTT	746.908	0.01	60	5.1	10.18			0	0	0	0	0	0	0	0	0	0	0	0	556	0	0	0	0	0	0	0	0	0	0	0	0	0	0	0	0	2230	0	0	0	0	0
YKASQESECYVIDAE	578.917	0.01	60	0	4			0	0	0	0	0	0	0	0	0	0	562	0	0	0	0	0	0	0	0	0	0	0	0	0	0	0	0	0	0	0	0	0	0	0	0
KAAVC	491.263	0.01	60	0	8.22			0	0	0	0	0	0	0	0	0	0	0	565	0	0	0	0	0	0	0	0	0	0	0	0	0	0	0	0	0	0	0	0	0	0	0
HGLLGSPVRA	1006.59	0.03	60	9.8	9.76			0	0	0	0	0	0	0	0	0	569	0	0	0	0	0	0	0	0	686	0	157	77.6	0	0	0	0	0	0	339	1450	0	0	0	0	133
PPLLL	552.366	0.02	60	9.3	5.96			0	0	0	0	18	0	144	0	184	0	0	227	0	0	0	0	0	0	0	0	0	0	0	14.6	0	0	8.71	71.9	0	0	0	0	1210	0	82.1
KVAVHSGGR	910.528	0.01	60	9.7	11	sp|O95714|HERC2_HUMAN		0	0	0	0	0	0	0	0	0	238	0	0	0	0	0	0	0	347	0	0	0	0	0	0	0	0	0	0	0	0	0	0	0	0	0
KFVVK	620.406	0.04	60	3.5	10			0	0	0	0	0	0	425	0	0	167	0	0	0	0	0	0	0	0	0	0	0	0	0	0	0	0	0	0	1190	0	0	548	1080	0	0
Q(-17.03)KSAALIIQK	1082.64	0.06	4.6	10	10		Pyro-glu from Q	0	0	0	74.7	102	0	0	0	0	123	0	0	0	0	0	296	0	0	357	50.1	475	38.9	666	274	142	0	175	0	301	474	35	0	0	1110	0
HVPLAAL	720.446	0.01	60	7.9	6.74			0	0	598	0	0	0	0	0	0	0	0	0	0	0	0	0	0	0	0	0	0	0	0	0	280	0	0	0	0	0	0	0	0	0	0
QSPLAQ(+.98)Q(+.98)SPL	535.764	0.06	60	2.9	5.52		Deamidation (NQ)	0	0	0	0	0	0	0	0	601	0	0	0	0	0	0	0	0	0	0	0	0	664	0	0	0	0	0	0	0	986	0	0	1120	0	0
ETLQVMEAAPGTGLP	757.366	0.03	60	6.7	3.8			0	0	178	0	0	0	0	0	0	0	0	425	0	0	0	0	0	0	0	0	0	0	0	0	0	0	0	0	0	3810	0	0	0	0	0
GFLALLGLQ	466.283	0.02	60	1.2	5.52			0	0	0	0	0	0	0	0	0	0	0	0	0	0	613	0	0	0	0	0	0	0	0	0	0	0	0	0	2470	2470	0	0	0	0	0
QLLPGAKLG	896.553	0.01	60	11.7	8.75			0	0	0	0	0	0	4	0	0	135	0	0	214	0	0	0	264	0	0	569	388	0	0	98.8	0	1080	0	0	144	0	0	59.9	399	0	0
DQNVEELKGRLTPY	554.621	0.01	60	0	4.68			0	0	0	0	623	0	0	0	0	0	0	0	0	0	0	0	0	0	0	0	0	0	0	0	0	0	0	0	0	0	0	0	0	0	0
DGLYS	554.241	0.03	60	6.7	3.8			0	0	0	0	0	0	0	0	0	0	635	0	0	0	0	0	0	0	0	0	0	0	0	2420	0	0	0	0	0	0	0	0	169	0	0
GKPGLLGPKGE	1052.62	0.01	60	5.7	8.59			0	0	0	0	234	0	323	0	0	80.2	0	0	0	0	0	0	0	0	0	0	1.89	23.1	0	0	0	0	0	0	235	0	0	0	0	0	0
VAAAAASANGAAGGL	586.312	0.01	60	16	5.49			0	0	0	0	0	0	0	0	0	0	639	0	0	0	0	0	0	0	0	0	0	0	0	0	0	0	0	0	0	0	0	360	0	0	0
Q(-17.03)LKLVGNFKLKEALAAKDFVNLRSLSVP	771.223	0.01	60	7.2	10		Pyro-glu from Q	0	0	0	0	0	639	0	0	0	0	0	0	0	0	0	0	0	0	0	0	713	0	0	0	0	0	0	0	0	0	0	0	0	306	0
A(+42.01)DMQNLVERLE	680.33	0.03	60	3.1	4.14		Acetylation (Protein N-term)	0	0	0	0	0	0	0	0	0	0	0	0	642	0	0	0	0	0	0	0	0	0	0	0	0	0	0	51.4	213	933	0	0	0	0	529
DQ(+.98)STTHWLQ(+.98)GQ(+.98)GP	486.548	0.01	60	0	5.08		Deamidation (NQ)	0	0	0	0	0	0	0	0	0	646	0	0	0	0	0	0	0	0	0	0	0	0	0	0	0	0	0	0	0	0	0	0	0	0	0
CSPDTGSC	385.127	0.1	60	2.6	3.8			0	0	0	0	0	0	0	0	0	0	0	0	647	0	0	0	0	0	0	742	0	2250	0	0	1390	0	0	2190	1590	0	0	0	0	994	0
YNRGDSTFESKSYKMADEAGSEADHEGTH	644.678	0.03	60	14.5	4.69	sp|P02671|FIBA_HUMAN		0	0	0	0	0	0	0	651	0	0	0	0	0	0	0	0	0	0	0	0	0	0	6720	4490	0	0	0	0	0	0	0	0	0	0	0
M(+15.99)LAAGNGQGIM	539.76	0.01	60	0	5.28	sp|Q09472|EP300_HUMAN	Oxidation (M)	0	0	0	0	0	0	0	0	0	0	0	0	0	653	0	0	0	0	0	0	0	0	0	0	0	0	0	0	0	0	0	0	0	0	0
TAEAEG	577.25	0.01	60	0	3.79			0	0	0	0	657	0	0	0	0	0	0	0	0	0	0	0	0	0	0	0	0	0	0	0	0	0	0	0	0	0	0	0	0	0	0
IQTLQAPPDM(+15.99)APAN(+.98)VSLRTASET	1214.59	0.01	60	5.7	4.37		Oxidation (M); Deamidation (NQ)	0	366	0	0	0	0	0	0	0	0	0	0	0	0	0	0	292	0	0	0	0	0	0	0	0	0	0	0	0	0	0	0	0	0	0
SSLLAELEAI	523.284	0.01	60	0	3.79			0	666	0	0	0	0	0	0	0	0	0	0	0	0	0	0	0	0	0	0	0	0	0	0	0	0	0	0	0	0	0	0	0	0	0
QRTQALRGGQRLEIQ	585.33	0.01	60	9.6	11.7			0	0	0	0	0	0	0	0	0	0	0	0	0	668	0	0	0	0	0	0	0	0	0	28800	0	0	0	0	0	0	0	0	0	0	0
IAGVLVIALPIPIIVNN(+.98)FSE	698.434	0.01	60	4.2	4		Deamidation (NQ)	0	0	0	0	0	0	0	0	0	0	240	0	0	188	242	0	0	0	0	0	0	0	0	0	0	26.7	0	0	0	0	0	107	0	115	0
PGNCH	527.207	0.01	60	0	7.12			0	0	0	0	0	0	0	0	0	0	0	0	0	0	0	673	0	0	0	0	0	0	0	0	0	0	0	0	0	0	0	0	0	0	0
QLGATLLRL	984.616	0.01	60	9.9	9.75			0	0	0	0	0	0	0	0	0	409	0	0	0	268	0	0	0	0	0	0	0	2940	0	0	0	0	0	0	0	0	0	0	0	0	711
SSM(+15.99)GQ(+.98)SSAFQ(+.98)LS	1247.52	0.02	60	2.7	5.24		Oxidation (M); Deamidation (NQ)	0	0	0	0	0	0	0	35.3	0	0	648	0	0	0	0	0	0	0	3080	0	0	0	0	0	0	0	0	0	0	0	0	4010	0	1940	0
AVGHL	496.295	0.02	60	5.3	6.79			0	0	0	0	0	0	0	0	0	693	0	0	0	0	0	0	0	0	0	0	0	0	34300	38100	0	0	0	0	0	0	0	0	0	0	0
SAPTDVLDSLTTIPEL	836.432	0.07	60	8.6	3.49			0	0	0	0	0	0	694	0	0	0	0	0	0	0	0	0	0	0	0	0	0	0	0	0	0	0	0	0	916	1540	0	1050	1470	0	713
GGSTSYGTGSETESPRN(+.98)PSSAGSWNSGSSGPGSTGN	1121.48	0.01	60	2.5	4.53	sp|P02671|FIBA_HUMAN	Deamidation (NQ)	0	0	0	0	0	0	0	0	0	695	0	0	0	0	0	0	0	0	0	0	0	0	0	0	0	0	0	0	0	0	0	0	0	0	0
NGECSN(+.98)SSGTGKTSM(+15.99)P	525.218	0.01	60	14.4	5.99		Deamidation (NQ); Oxidation (M)	0	0	0	0	0	0	0	0	0	0	704	0	0	0	0	0	0	0	0	0	0	0	1720	0	0	0	0	0	0	0	0	0	0	0	0
GGSTSYGTGSETESPRNPSSAGSWN(+.98)SGSSGPGSTGNR	1173.51	0.02	60	0.4	6.14	sp|P02671|FIBA_HUMAN	Deamidation (NQ)	0	0	0	0	0	0	0	0	0	708	0	0	0	0	0	0	0	0	0	0	0	0	0	0	0	0	0	0	0	0	0	0	0	0	0
GIDGVKGDKGNPGWPGAPGVPGP	533.026	0.02	60	12.6	5.96			0	0	0	0	0	0	0	0	0	0	0	0	0	0	708	0	0	0	0	0	0	0	0	0	0	0	0	0	0	0	0	0	0	0	0
LIAYK	607.396	0.01	60	9.8	8.59			0	0	0	0	0	0	0	0	708	0	0	0	0	0	0	0	0	0	0	0	871	0	0	0	0	0	0	0	0	0	1150	0	0	0	0
APEVGPPSYAPQVTP	755.387	0.01	60	17.2	4			0	0	0	0	0	0	0	0	0	0	0	0	0	0	715	0	0	0	0	0	10300	0	0	0	0	6560	0	0	0	0	0	0	0	0	0
SPPKRGPLP	474.786	0.03	60	2	11			0	0	0	0	716	0	0	0	0	0	0	0	0	0	0	0	0	0	2920	1370	1310	0	2810	0	0	0	0	0	1080	0	0	0	0	0	0
QGICDLLTQTENRLIGHQEAFMIGDGTVELKKYQ(+.98)SKQ	1049.03	0.01	60	9.1	5.56		Deamidation (NQ)	0	0	719	0	0	0	0	0	0	0	0	0	0	0	0	0	0	0	0	0	0	0	0	0	0	0	0	247	0	3070	0	0	0	0	0
SKART	562.326	0.01	60	4	11			0	0	0	0	0	0	0	0	0	0	0	0	0	0	0	0	0	726	0	0	0	0	0	0	0	0	0	0	0	0	0	0	0	0	0
PCSSVPSSPSFCAPSPGTGGGGGAGGGGGSSQAGGAPGPPS	1114.81	0.01	60	0	5.87			0	0	0	0	0	0	0	0	0	737	0	0	0	0	0	0	0	0	0	0	0	0	0	0	0	0	0	0	0	0	0	0	0	0	0
NSYDALE	406.177	0.01	60	5.5	3.67			0	0	0	0	739	0	0	0	0	0	0	0	0	0	0	0	0	0	0	0	0	0	0	0	0	0	0	0	0	0	0	0	0	0	0
NSCPP	517.207	0.06	60	2.6	5.52			0	0	0	0	0	0	0	0	0	0	0	0	0	739	0	0	0	0	0	0	0	862	0	3980	0	4310	2010	0	0	0	0	0	0	3180	0
NIKYHEEFEKS	475.233	0.01	60	0	5.5			0	0	0	0	0	0	0	0	0	0	0	0	744	0	0	0	0	0	0	0	0	0	0	0	0	0	0	0	0	0	0	0	0	0	0
RGAASKVKVPM	1143.66	0.04	60	8.2	11.17			0	0	347	0	0	0	0	0	0	397	0	0	0	0	0	0	0	0	0	113	0	1120	1610	0	696	1710	861	683	590	184	0	0	630	0	0
AMGETF	655.277	0.01	60	8.2	4			272	0	0	0	0	0	0	0	0	0	484	0	0	0	0	0	0	0	0	0	0	0	0	0	0	0	0	0	0	0	0	0	0	0	0
E(-18.01)AASVSSADTGLCSEACLF	461.454	0.03	60	6.5	3.57		Pyro-glu from E	0	0	0	0	0	0	759	0	0	0	0	0	0	0	0	0	0	0	2380	0	0	0	0	0	0	1420	0	0	0	0	0	0	0	0	0
GQSPNYGQHGSGSGQSSSN(+.98)DTH	1095.42	0.01	60	0	5.97		Deamidation (NQ)	0	0	0	0	760	0	0	0	0	0	0	0	0	0	0	0	0	0	0	0	0	0	0	0	0	0	0	0	0	0	0	0	0	0	0
SSYSKQFTSSTSYN(+.98)RGDSTFES	1234.04	0.01	60	0	5.79	sp|P02671|FIBA_HUMAN	Deamidation (NQ)	0	0	0	0	0	0	0	0	0	0	762	0	0	0	0	0	0	0	0	0	0	0	0	0	0	0	0	0	0	0	0	0	0	0	0
TVEGPCEAQ(+.98)LECLDNGDGTCSVSYVPTE	584.24	0.01	60	2.3	3.34		Deamidation (NQ)	0	0	0	0	0	0	0	0	0	0	0	0	762	0	0	0	0	0	0	0	0	0	0	2470	0	0	0	0	0	0	0	0	0	0	0
KKVKK	630.455	0.08	60	3.8	10.48	sp|Q96P44|COLA1_HUMAN		0	0	0	0	0	0	0	0	262	505	0	0	0	0	0	0	0	0	0	0	0	0	0	0	0	0	0	0	223	0	0	0	0	0	0
PSVRGTETTGQ(+.98)SAAESVTTGPVT	559.264	0.01	60	12.7	4.53		Deamidation (NQ)	0	0	0	0	0	0	0	0	0	0	0	0	0	0	778	0	0	0	0	0	0	0	0	0	0	0	0	0	934	0	0	0	0	0	0
SLKSQ(+.98)IAEAKIICKTFKM(+15.99)S	429.434	0.01	60	0	9.63		Deamidation (NQ); Oxidation (M)	0	0	0	0	0	0	0	0	0	779	0	0	0	0	0	0	0	0	0	0	0	0	0	0	0	0	0	0	0	0	0	0	0	0	0
SSGGAGT	536.223	0.02	60	7.2	5.24			0	0	0	0	0	0	0	0	0	0	0	0	0	0	0	0	0	780	0	0	0	0	0	0	0	0	0	245	0	0	0	0	0	0	0
NDGLC	521.196	0.01	60	4.2	3.8			0	0	0	0	0	0	0	0	0	0	0	0	781	0	0	0	0	0	0	0	0	2110	0	0	0	0	0	0	0	0	0	0	0	0	0
FAGLKNLRVL	565.865	0.01	60	11.6	11			0	0	0	0	0	0	0	0	0	0	0	0	0	0	0	784	0	0	0	0	0	0	0	4920	0	0	0	0	0	3940	0	0	0	0	736
TQVNEDCVGDG	568.723	0.02	60	6.4	3.49			0	0	0	0	0	0	0	0	0	0	0	0	0	0	786	0	0	0	322	0	0	0	0	0	0	0	0	0	0	0	0	0	502	0	0
KFSPGAPGGSGSQPN(+.98)QKLGHPEALSAGTGSPQPPSFTY	935.702	0.01	60	0.5	8.51	sp|Q15942|ZYX_HUMAN	Deamidation (NQ)	0	0	0	0	0	0	790	0	0	0	0	0	0	0	0	0	0	0	0	0	0	0	0	0	0	0	0	0	0	4740	0	0	0	0	0
PPLPGAGILPLPPLPGAGIPPPPP	1116.68	0.01	60	6.1	5.96			0	0	0	0	0	805	0	0	0	0	0	0	0	0	0	0	0	0	865	2000	0	0	0	0	576	1420	1320	0	0	0	0	0	2450	0	0
LLPGGGLLPT	937.579	0.01	5.3	9.1	5.52			0	185	0	0	0	0	0	0	0	234	0	0	0	218	0	0	172	0	0	0	0	0	0	327	80.9	0	0	0	0	73.7	0	0	605	0	0
RPGVK	556.36	0.01	60	9.9	11			390	0	0	0	0	0	0	0	0	0	0	0	0	0	420	0	0	0	0	0	0	795	0	0	0	0	0	957	0	0	0	163	0	0	0
KAPPQVAVAAG	504.807	0.01	60	3	8.75			0	0	0	0	0	0	0	0	0	0	811	0	0	0	0	0	0	0	0	0	0	0	0	0	0	0	0	0	0	0	0	0	0	0	2660
MADEAGSEADHEGTHSTKR	507.975	0.01	60	15.4	4.86	sp|P02671|FIBA_HUMAN		0	0	0	0	0	0	0	0	0	815	0	0	0	0	0	0	0	0	0	0	0	0	0	0	0	0	0	0	0	0	0	0	0	0	0
KSETDGNV	425.203	0.01	60	0	4.37	sp|Q9UPN3|MACF1_HUMAN		0	0	0	0	0	0	0	0	0	0	815	0	0	0	0	0	0	0	0	0	0	0	0	0	0	0	0	0	0	0	0	0	0	0	0
RPSAGVTGTTGLSA	637.835	0.03	60	1	9.75			0	0	0	0	822	0	0	0	0	0	0	0	0	0	0	0	0	0	0	0	5110	0	0	0	0	0	0	0	0	0	0	0	0	0	0
MQNLQ	633.288	0.03	60	3.2	5.28			0	0	0	0	0	0	0	0	825	0	0	0	0	0	0	0	0	0	0	0	0	0	0	0	0	1130	0	0	0	0	0	0	0	0	0
QAANIVRALEL	1197.74	0.01	60	7.7	6			0	0	0	0	0	0	136	0	0	0	0	0	0	0	691	0	0	0	1490	84.2	0	0	0	0	103	1190	0	306	81.7	0	0	0	0	0	0
RLGASVLTV	915.567	0.01	60	9	9.75			0	0	691	0	0	0	0	0	0	138	0	0	0	0	0	0	0	0	1220	0	0	0	0	0	184	0	0	0	48.8	0	0	114	0	0	0
MN(+.98)EKKQAEGGR	624.803	0.01	60	0	8.34		Deamidation (NQ)	0	0	0	0	0	0	0	0	0	0	832	0	0	0	0	0	0	0	0	0	0	0	0	0	0	0	0	0	0	0	0	0	0	0	0
TSGTGT	523.252	0.02	60	8.9	5.19			0	0	0	0	0	0	0	0	0	833	0	0	0	0	0	0	0	0	0	0	0	0	0	0	0	0	0	0	0	0	0	0	0	0	0
KGRLLYGLT	1020.6	0.02	60	9	9.99			0	0	0	511	257	0	0	0	0	68.4	0	0	0	0	0	0	0	0	38.5	0	125	0	0	0	0	185	88.9	0	307	227	0	0	0	0	0
Q(+.98)GVNDNEEGFFSA	707.793	0.01	60	0	3.57	sp|P02675|FIBB_HUMAN	Deamidation (NQ)	0	0	0	0	0	0	0	0	0	0	0	0	837	0	0	0	0	0	0	0	0	0	0	0	0	0	0	0	0	0	0	0	0	0	0
DDETEEGAGDM(+15.99)SQ	467.168	0.02	60	7.6	3.29		Oxidation (M)	0	0	0	0	0	0	0	0	0	0	0	0	0	0	0	0	839	0	1190	0	427	0	2520	0	0	0	0	0	0	0	0	0	0	0	0
GGPGDGGA	587.247	0.02	60	6.4	3.8			0	0	0	0	0	0	0	845	0	0	0	0	0	0	0	0	0	0	0	0	0	0	0	0	0	0	0	0	0	0	0	0	0	0	0
SYDLDPGAGSLEI	668.817	0.01	60	0	3.49			0	0	0	0	0	0	0	0	0	847	0	0	0	0	0	0	0	0	0	0	0	0	0	0	0	0	0	0	0	0	0	0	0	0	0
GHEGSVDAPAPS	1123.49	0.01	60	0	4.35			0	0	0	0	0	0	0	858	0	0	0	0	0	0	0	0	0	0	0	0	0	0	0	0	0	0	0	0	0	0	0	0	0	0	0
KIVRPADK	463.806	0.01	60	6.1	9.99			0	0	0	0	0	620	0	0	0	0	0	0	0	266	0	0	0	0	0	0	0	0	4870	14900	0	0	799	0	0	0	0	0	3840	0	0
KAAATPAKK	885.55	0.01	60	10.9	10.3			0	0	0	0	0	0	0	0	893	0	0	0	0	0	0	0	0	0	0	0	0	0	0	431	200	1730	0	0	0	0	281	156	0	0	0
ECCCCCCEECIQ	456.789	0.01	60	2.6	3.67			0	0	0	0	0	0	0	0	0	0	0	894	0	0	0	0	0	0	0	0	0	0	0	0	0	1780	0	0	0	0	0	1720	0	0	0
Q(-17.03)DSHVSIS	428.192	0.03	60	9.2	5.08		Pyro-glu from Q	0	0	0	0	0	0	0	0	0	0	0	0	0	896	0	0	0	0	0	0	0	0	0	0	0	0	0	0	0	0	0	0	0	0	0
ESGGFGSHHHN(+.98)	583.742	0.01	60	0	6.27		Deamidation (NQ)	0	0	0	0	0	0	0	0	0	898	0	0	0	0	0	0	0	0	0	0	0	0	0	0	0	0	0	0	0	0	0	0	0	0	0
RALYLRKTVLGKLAFQVALVLAIHLWMFFILP	936.058	0.01	60	10.2	11.1			0	0	0	0	0	0	0	0	0	0	0	0	0	0	0	0	898	0	351	0	0	0	0	0	0	0	0	0	0	1420	0	0	0	0	0
E(-18.01)KLKVAPPN	489.299	0.01	60	12.6	8.69		Pyro-glu from E	0	0	0	0	0	0	0	0	0	0	0	900	0	0	0	0	0	0	0	0	0	0	0	0	0	1020	0	0	0	0	0	0	0	0	0
CAAGGQGH	350.643	0.01	60	3.8	6.73			0	0	0	0	0	0	0	0	0	0	0	0	0	901	0	0	0	0	0	0	0	0	0	0	0	0	0	0	0	0	0	0	0	1360	0
YPKLKLKIMIRDKLVR	672.115	0.04	60	4.2	10.56			0	0	0	0	834	0	0	0	0	74.2	0	0	0	0	0	0	0	0	0	0	0	0	0	0	0	0	0	0	0	0	0	0	0	0	0
STLIVTHALHKVKVGKSPPVRGSLSGKVSLPCHFST	754.42	0.01	60	3.9	10.48			0	0	0	0	0	0	0	0	0	0	0	0	0	914	0	0	0	0	0	0	0	0	0	289	0	0	0	0	0	0	0	0	0	0	0
KDKTLLRDEKKMEKL	469.523	0.02	60	5.5	9.4			0	0	0	0	0	0	0	0	0	0	0	0	918	0	0	0	0	0	0	0	0	0	0	0	0	0	0	0	0	0	0	0	367	0	0
CPCASGLTCVELADAEVGLHVG	536.753	0.03	60	8.3	4.13			0	0	0	0	0	0	0	0	0	0	923	0	0	0	0	0	0	0	0	0	1990	0	0	3930	0	0	0	0	0	0	0	0	0	0	0
RGHHS	593.29	0.01	60	0	9.76			0	0	0	0	0	0	0	0	0	0	927	0	0	0	0	0	0	0	0	0	0	0	0	0	0	0	0	0	0	0	0	0	0	0	0
YCGSHGT	724.264	0.02	60	16.3	6.73			333	0	0	0	0	0	0	0	0	0	0	0	0	0	0	0	604	0	0	0	0	0	0	0	0	0	0	0	0	0	0	0	0	0	0
NAMAT	507.222	0.01	60	0	5.52			0	0	0	0	0	0	0	0	0	0	0	0	0	0	0	0	0	937	0	0	0	0	0	0	0	0	0	0	0	0	0	0	0	0	0
VEGEIAEEAAEKA	449.221	0.01	60	1.1	3.98			0	0	0	0	0	0	0	0	0	0	0	0	0	0	937	0	0	0	0	0	0	0	0	0	0	0	0	0	0	788	0	0	0	0	0
QDSDHPPSHDTQ(+.98)PGEHQKTHTDSKSY	987.428	0.01	60	7.2	5.6		Deamidation (NQ)	0	0	0	0	0	937	0	0	0	0	0	0	0	0	0	0	0	0	8500	0	0	623	0	0	0	0	0	0	0	0	2820	0	0	0	0
EEELVKVREKQLA	524.305	0.01	60	0	4.95			0	0	0	0	0	0	0	0	0	0	0	0	944	0	0	0	0	0	0	0	0	0	0	0	0	0	0	0	0	0	0	0	0	0	0
KSGGRRVR	915.556	0.02	60	5.4	12.3			0	0	887	0	0	0	0	0	0	58.9	0	0	0	0	0	0	0	0	233	0	0	0	0	0	436	0	0	0	443	0	0	303	0	0	0
SSSGSSGGGGGS	883.336	0.01	60	0	5.24			0	0	0	0	0	0	0	0	0	0	0	0	0	954	0	0	0	0	0	0	0	0	0	0	0	0	0	0	0	0	0	0	0	0	0
Q(-17.03)RACGQRGPGPPKPQEGNTVPGEWPWQ(+.98)AS	1033.82	0.04	60	9.6	8.22		Pyro-glu from Q; Deamidation (NQ)	0	0	0	0	0	0	0	0	0	0	0	0	0	0	958	0	0	0	0	0	0	0	0	0	0	0	0	0	0	0	0	0	0	0	0
KIALHNQK	951.578	0.02	5.29	11.3	10			0	0	0	0	0	10.1	0	518	0	33.1	0	0	0	0	0	117	284	0	3350	103	146	0	0	685	0	0	0	0	0	0	72.8	775	0	0	0
QMSMN(+.98)N(+.98)SHS	519.187	0.02	60	3.2	6.74		Deamidation (NQ)	0	0	0	0	0	0	0	0	0	0	0	0	0	0	964	0	0	0	1110	0	0	0	0	0	0	0	0	0	0	0	0	0	0	0	0
GNALVVDPKK	1040.61	0.06	5.58	7.9	8.59			121	0	0	0	0	0	39.1	0	0	334	0	0	0	0	0	470	0	0	0	308	0	783	197	0	62.1	0	37.2	0	218	626	0	0	459	280	360
QGNSASGN(+.98)HFSGHGMSFN(+.98)APFSGAPNGNQ(+.98)MSCGQ	1129.11	0.01	60	12.3	6.91	sp|Q14686|NCOA6_HUMAN	Deamidation (NQ)	0	0	0	0	0	0	0	0	0	0	0	979	0	0	0	0	0	0	0	0	0	0	0	0	0	0	0	0	0	0	0	0	0	0	3880
DVREAEGQLQ	572.786	0.02	60	8.5	4.14			0	987	0	0	0	0	0	0	0	0	0	0	0	0	0	0	0	0	0	0	0	175	0	0	0	0	0	0	0	0	0	0	0	0	0
AAAGSGG	490.222	0.03	60	4.4	5.57			0	0	0	0	0	0	465	0	0	526	0	0	0	0	0	0	0	0	0	0	0	0	0	0	0	0	0	0	0	0	0	0	0	0	0
HLGIAKVVF	983.605	0.02	5.33	10.2	8.76			0	0	0	0	0	495	0	0	0	73.2	0	100	148	100	0	75.5	0	0	282	0	222	0	0	0	0	0	0	0	0	0	0	0	0	238	0
LAESGRKIL	986.585	0.01	60	8.3	8.75			0	480	423	0	0	0	0	0	0	95.6	0	0	0	0	0	0	0	0	0	0	63.9	298	126	0	0	1340	0	0	0	0	0	0	0	0	0
GAEQ(+.98)LAEGGR	494.733	0.01	60	0	4.53		Deamidation (NQ)	0	0	0	0	0	0	0	0	0	0	0	0	0	0	0	0	0	999	0	0	0	0	0	0	0	0	0	0	0	0	0	0	0	0	0
TM(+15.99)TPT	566.256	0.01	60	3.9	5.19		Oxidation (M)	0	0	0	0	0	0	0	0	0	0	0	0	999	0	0	0	0	0	0	0	0	0	0	0	0	3020	0	0	0	0	0	0	0	0	0
RVFIAGLG	832.505	0.02	60	8.9	9.75			0	0	0	0	264	0	0	0	330	342	0	66.5	0	0	0	0	0	0	331	0	0	1910	0	0	0	0	2260	0	0	0	0	0	138	0	102
KSATAKGKK	918.563	0.03	3.29	11.4	10.48			0	0	125	0	221	134	52.8	13	0	91.9	0	0	368	0	0	0	0	0	725	79.4	0	0	0	0	0	0	0	0	0	51.6	0	0	106	0	0
LAGSGT	505.257	0.01	60	9.8	5.52			0	1010	0	0	0	0	0	0	0	0	0	0	0	0	0	0	0	0	0	0	0	0	0	0	0	0	0	0	0	0	0	0	0	0	0
PVSKILGK	841.547	0.01	60	7	10.02	sp|Q86U86|PB1_HUMAN		0	0	0	0	0	0	0	0	1010	0	0	0	0	0	0	0	0	0	2000	0	0	0	0	0	0	0	0	0	0	0	0	0	0	0	0
GSATIVNITI	988.578	0.02	60	7.6	5.52			429	0	0	0	0	479	0	0	0	103	0	0	0	0	0	0	0	0	3470	0	0	0	0	0	0	0	0	0	0	494	0	0	0	0	0
GLLQ(+.98)QPPALGRGGSGGGGGPPAKR	547.3	0.01	60	0	12.01		Deamidation (NQ)	0	0	0	0	0	0	0	0	0	1020	0	0	0	0	0	0	0	0	0	0	0	0	0	0	0	0	0	0	0	0	0	0	0	0	0
ANSRPLDHAQPPSSLVIDKESEVY	663.829	0.01	60	8.1	4.75	sp|O00151|PDLI1_HUMAN		0	0	0	0	0	0	0	309	0	0	0	0	0	0	717	0	0	0	0	0	0	0	0	0	0	3750	1790	0	0	0	0	0	0	0	0
IVSGR	531.338	0.01	60	13	9.75			0	0	0	0	0	0	0	0	1030	0	0	0	0	0	0	0	0	0	0	0	0	0	0	985	0	1980	0	0	0	0	0	0	0	0	0
YGFQVKVLR	1109.66	0.03	5.47	10.1	9.99			0	0	0	0	0	898	0	0	0	90.3	0	0	0	0	0	41.8	0	0	286	0	91	108	517	444	0	0	184	0	0	177	0	317	0	0	0
GPLVAPTPL	864.534	0.01	60	8.5	5.52			0	0	0	0	191	54	0	533	0	254	0	0	0	0	0	0	0	0	87.2	0	0	0	313	0	0	0	0	0	0	0	0	0	187	0	0
VFTLLRLLVVA	622.41	0.02	60	7	9.72			0	0	0	0	0	0	0	0	0	0	0	0	0	0	543	489	0	0	0	999	0	108	0	0	0	846	561	0	783	0	0	0	879	0	0
E(-18.01)FGEVCRGRLKQPGRREVFVAIKTLKVGYTERQRRDFLS	922.125	0.01	60	14.8	10.4		Pyro-glu from E	0	0	0	0	526	0	0	0	0	0	0	0	0	0	511	0	0	0	0	0	0	0	0	0	0	0	0	0	0	0	0	0	0	0	0
EGQ(+.98)YYGSSSM	555.21	0.01	60	0	4		Deamidation (NQ)	0	0	0	0	0	0	0	0	0	0	0	0	1040	0	0	0	0	0	0	0	0	0	0	0	0	0	0	0	0	0	0	0	0	0	0
THRAIVAK	448.273	0.01	60	5.3	11			0	0	0	0	0	0	1040	0	0	0	0	0	0	0	0	0	0	0	0	339	0	0	0	0	0	0	0	2250	0	926	0	0	0	2470	0
HKTTIALLFVGAIIYDLAVVGTVDVIPLFV	800.227	0.01	60	10.3	5.21			0	0	0	0	0	0	0	0	0	0	0	1040	0	0	0	0	0	0	1010	3040	0	0	0	3100	0	0	0	0	0	0	0	0	0	1480	0
NNSEEEEDDDDEE	523.5	0.01	60	3.9	3.14			0	0	0	0	0	0	0	0	0	0	0	0	1050	0	0	0	0	0	0	0	0	3070	0	0	1190	0	0	0	0	0	0	0	0	0	0
GRTSPGGR	787.417	0.01	60	0	12			0	0	0	0	0	0	0	0	0	0	1060	0	0	0	0	0	0	0	0	0	0	0	0	0	0	0	0	0	0	0	0	0	0	0	0
SKITHRIHWESA	488.928	0.01	60	3	8.51	sp|P01024|CO3_HUMAN		0	0	0	0	0	0	0	0	0	0	0	0	1060	0	0	0	0	0	0	0	0	0	0	0	0	0	0	0	982	0	0	0	0	0	0
HYSLSVTVPVLIAGFGVLLVLILTFFLV	758.465	0.01	60	11.1	6.74			0	0	0	565	0	0	0	496	0	0	0	0	0	0	0	0	0	0	515	3860	0	0	0	0	0	0	0	0	0	0	0	0	0	0	0
QVTCT	551.246	0.01	60	0	5.52			0	0	0	0	0	0	0	0	0	0	1070	0	0	0	0	0	0	0	0	0	0	0	0	0	0	0	0	0	0	0	0	0	0	0	0
KDYEEVGIDSYEDEDEGE	1060.92	0.01	60	0	3.51	sp|P68366|TBA4A_HUMAN		0	0	0	0	0	0	1070	0	0	0	0	0	0	0	0	0	0	0	0	0	0	0	0	0	0	0	232	258	0	0	0	0	0	0	0
DGGYD	526.182	0.01	60	7.6	3.56			0	0	0	0	0	0	0	0	0	0	0	1070	0	0	0	0	0	0	0	0	0	0	0	0	1600	3480	0	0	0	0	1190	1490	0	0	0
VFPAVQGKTK	1074.65	0.01	60	9.1	10			0	0	0	156	460	368	0	0	0	92.9	0	0	0	0	0	0	0	0	367	0	0	4000	540	0	93.7	456	0	0	0	0	0	0	0	0	0
HPAAA	466.232	0.03	60	3.7	6.74			0	0	0	0	0	0	0	0	109	969	0	0	0	0	0	0	0	0	0	0	0	0	0	0	0	0	0	0	0	0	0	0	0	0	0
RLGGVSGILQV	1098.68	0.03	2.79	10.4	9.75			0	0	0	0	28.6	99.8	641	0	0	0	0	0	0	0	310	0	0	0	0	165	0	0	0	20.2	84	241	55.6	0	75.7	41.1	183	120	0	0	0
LHVKYAT	416.242	0.01	60	0	8.6			0	0	0	0	0	0	0	0	0	0	0	0	0	1080	0	0	0	0	0	0	0	0	0	0	0	0	0	0	0	0	0	0	0	0	0
KITHRIHWESASLL	564.31	0.03	60	4.5	8.76	sp|P01024|CO3_HUMAN		0	0	0	597	0	0	451	38.1	0	0	0	0	0	0	0	0	0	0	0	3040	2620	0	1180	2640	0	1740	0	0	0	0	589	1150	0	0	0
KAKEGVVAAAEKTKQGVAEAAG	529.04	0.01	60	0	8.43			0	0	0	0	0	0	0	0	0	0	0	0	1090	0	0	0	0	0	0	0	0	0	0	0	0	0	0	0	0	0	0	0	0	0	0
HGVELLKI	908.562	0.04	60	10.1	6.75			0	0	171	172	367	48.9	0	0	0	0	0	0	0	0	0	0	0	333	3590	0	0	144	167	0	0	18.5	338	0	0	232	0	501	0	0	0
TQEIDLRVSTFEGSLAK	632.001	0.01	60	1.1	4.68			0	0	0	0	0	0	0	0	0	0	0	0	0	1100	0	0	0	0	0	0	0	0	0	0	0	0	0	0	0	0	0	0	0	0	0
TTKKK	605.4	0.04	60	0.7	10.3			0	0	0	0	0	0	0	0	0	0	0	0	0	0	0	0	0	1100	0	0	0	0	0	0	3090	0	470	0	0	0	0	0	0	0	0
Q(-17.03)YTSAIEGTKSAKPTKPAASDLPVPAEGVRNI	820.681	0.02	60	8.6	8.43		Pyro-glu from Q	0	0	0	0	1100	0	0	0	0	0	0	0	0	0	0	0	0	0	0	0	0	0	0	0	0	0	4400	1540	0	3440	0	0	0	0	0
N(+.98)GLPDHT	754.342	0.01	60	1.8	5.08		Deamidation (NQ)	0	0	0	0	0	0	0	0	0	0	0	0	0	0	1110	0	0	0	0	0	0	0	0	0	0	0	0	0	0	0	132	0	0	0	0
KPLFVR	759.48	0.01	60	9.5	11			0	0	0	0	887	0	0	0	0	0	0	0	0	223	0	0	0	0	0	0	0	0	0	0	0	1050	0	0	0	0	0	0	0	0	0
GGGVDTRDAEMPATEKDLA	644.968	0.01	60	4.9	4.11			0	0	0	0	0	0	0	0	0	0	0	0	0	0	1110	0	0	0	0	0	932	0	3410	2280	0	0	0	0	0	0	0	0	0	0	0
KTIPWFV	890.522	0.01	60	10.9	8.75			0	0	0	0	0	0	0	0	561	552	0	0	0	0	0	0	0	0	0	0	0	0	0	0	0	0	0	0	0	0	0	0	0	0	0
FTPLLHQI	968.565	0.01	60	6.1	6.74			0	0	0	0	0	0	0	810	0	305	0	0	0	0	0	0	0	0	0	0	0	0	0	0	0	0	0	0	0	217	0	0	0	0	0
KEGM(+15.99)LSIMS	506.247	0.01	60	4.8	6		Oxidation (M)	0	0	0	0	471	0	0	0	0	0	0	649	0	0	0	0	0	0	0	0	0	0	0	0	0	0	0	0	0	0	0	0	0	0	0
TFPLALVLS	960.593	0.04	5.43	8.4	5.19			0	0	0	138	0	0	41.3	334	0	190	167	0	0	0	0	126	132	0	0	0	6.46	186	0	0	0	114	0	0	0	283	0	0	0	79.4	0
KSSHNLAVHRM(+15.99)IHTG	568.636	0.02	60	16.2	11		Oxidation (M)	0	0	0	0	0	0	0	0	0	0	0	0	0	0	0	0	557	572	0	0	0	0	0	0	0	0	0	0	0	0	0	0	0	0	0
F(+42.01)LLGG	548.308	0.02	60	5.1	5.52	sp|P21817|RYR1_HUMAN	Acetylation (Protein N-term)	0	0	0	0	0	0	0	0	1130	0	0	0	0	0	0	0	0	0	0	0	0	0	0	0	0	0	0	0	0	0	0	0	0	0	0
SPLSKYRAL	1034.62	0.05	5.52	9.3	9.99			218	0	0	0	0	0	0	0	27.5	210	0	0	0	0	0	311	0	365	605	0	593	0	302	165	0	376	0	270	304	0	0	256	496	0	0
HVLLPVA	748.462	0.03	60	9.5	6.74			0	0	0	0	0	0	0	338	0	362	0	0	435	0	0	0	0	0	0	0	726	0	0	0	0	0	0	86.2	0	0	0	0	0	0	3530
GGSTSYGTGSETESPRNPSSAG	1043.47	0.02	60	14.9	4.53	sp|P02671|FIBA_HUMAN		1140	0	0	0	0	0	0	0	0	0	0	0	0	0	0	0	0	0	0	0	0	0	0	0	0	0	0	0	0	0	0	0	0	0	0
Q(+.98)SGPGDSAYGV	1038.43	0.01	60	19.3	3.8		Deamidation (NQ)	0	0	0	1140	0	0	0	0	0	0	0	0	0	0	0	0	0	0	0	0	0	0	0	0	0	0	0	0	0	0	0	0	256	0	0
ETATSGGCQ(+.98)PPGDSATGFHREG	721.62	0.01	60	3	4.65		Deamidation (NQ)	0	0	0	0	0	0	0	0	0	0	0	0	0	1140	0	0	0	0	0	0	0	0	0	0	0	0	0	0	0	0	0	0	0	0	2720
KKAKVAPPAK	519.341	0.01	60	2.5	10.48			0	0	0	0	0	0	1140	0	0	0	0	0	0	0	0	0	0	0	0	1650	0	0	0	0	0	2470	0	0	0	0	0	0	0	0	0
E(-18.01)LQGVVPR	879.521	0.01	60	10.3	6.1		Pyro-glu from E	0	704	0	0	0	0	56.2	0	0	382	0	0	0	0	0	0	0	0	6920	0	0	0	0	0	0	0	0	0	224	0	0	0	0	0	0
VILLGNGT	786.465	0.01	60	11	5.49			0	0	0	0	0	0	0	1090	0	0	0	0	0	0	0	0	0	57.8	501	2440	0	0	0	745	0	0	0	0	0	0	0	0	0	0	0
KDMFQ(+.98)ETMEA	615.741	0.02	60	13.7	4.14		Deamidation (NQ)	0	1150	0	0	0	0	0	0	0	0	0	0	0	0	0	0	0	0	0	0	0	0	0	0	0	0	0	0	0	0	0	0	0	0	0
MKGGASTTSTTPTPTPS	541.258	0.01	60	0	8.5			0	0	0	0	0	0	0	0	0	0	0	0	1170	0	0	0	0	0	0	0	0	0	0	0	0	0	0	0	0	0	0	0	0	0	0
AVPVPWKSTDPCQGHRESPGALV	1216.09	0.01	60	0	6.79			1170	0	0	0	0	0	0	0	0	0	0	0	0	0	0	0	0	0	0	0	0	0	0	0	0	0	0	0	0	0	0	0	0	0	0
VFVVGLPS	817.491	0.01	5.27	13.5	5.49			0	0	452	0	0	588	0	0	0	34.4	0	0	0	102	0	0	0	0	4120	0	1290	0	0	0	53.3	0	0	0	0	0	0	0	0	7.24	0
VILSFLFLL	1064.66	0.02	5.26	8.6	5.49			0	0	0	797	13	53.1	0	0	0	0	0	101	0	0	121	0	97.8	0	0	0	0	0	0	1010	3240	0	0	0	0	0	2120	1670	161	0	0
DNDGD	535.16	0.01	60	0	3.42			0	0	0	0	0	0	1190	0	0	0	0	0	0	0	0	0	0	0	0	0	0	0	0	0	0	0	0	0	0	0	0	0	0	0	0
RVAGTP	600.341	0.01	60	11.7	9.75			0	0	0	0	0	0	0	0	0	0	0	1190	0	0	0	0	0	0	0	0	0	0	0	0	0	0	0	0	0	0	0	0	0	0	0
KIGGINSLLSK	565.355	0.01	60	11.3	10			0	0	0	216	0	0	0	0	0	0	0	0	0	0	981	0	0	0	0	0	381	0	0	0	0	0	0	0	0	0	0	0	0	0	0
VHGSSP	583.288	0.01	60	8	6.71			0	0	0	0	0	0	0	0	0	0	1200	0	0	0	0	0	0	0	0	0	0	0	0	0	0	0	0	0	0	0	0	0	0	0	0
SSYKPIFSTLPET	490.594	0.01	60	0	5.72			0	0	0	0	0	0	0	0	0	1200	0	0	0	0	0	0	0	0	0	0	0	0	0	0	0	0	0	0	0	0	0	0	0	0	0
VTGLASLLLLAGAQYLPGWTVLFLSVLGLLA	793.233	0.01	60	10.3	5.49	sp|A6NKX4|S22AV_HUMAN		0	717	0	0	0	0	0	0	402	0	0	0	0	0	84.5	0	0	0	0	0	0	0	0	0	0	0	0	0	0	0	0	0	0	0	0
HGVKLGPALT	992.599	0.03	3.6	10.5	8.76			0	0	0	0	137	0	338	0	0	515	0	0	0	0	0	0	0	220	997	0	0	0	270	452	163	0	139	0	82.2	0	0	0	197	0	0
KHKNKGK	839.513	0.01	60	12.3	10.48			0	0	0	761	0	0	0	449	0	0	0	0	0	0	0	0	0	0	0	442	524	2580	0	932	0	1080	0	0	0	0	0	0	87.6	70.8	0
GFGAPSSLNK	489.263	0.01	60	6.3	8.75			0	0	0	0	0	0	0	0	0	0	0	0	0	0	1210	0	0	0	0	0	0	0	0	1670	0	0	0	0	0	0	0	0	0	2730	2600
VQITSEIYSIPETVAQGSGQ(+.98)QLFDHIV	740.886	0.01	60	0.8	4.13		Deamidation (NQ)	0	0	0	0	0	0	0	0	0	1220	0	0	0	0	0	0	0	0	0	0	0	0	952	0	0	0	0	0	0	0	0	0	0	0	0
RIAALESAK	958.566	0.01	3.26	6.5	8.75			0	0	458	0	0	0	0	0	0	167	0	0	0	0	0	595	0	0	0	212	0	0	1300	0	0	0	0	0	0	0	0	0	0	0	0
PGEGSKASSFN(+.98)ESGSQCF	607.248	0.04	60	8.3	4.53		Deamidation (NQ)	0	1230	0	0	0	0	0	0	0	0	0	0	0	0	0	0	0	0	0	0	0	0	0	0	0	0	0	0	0	0	0	0	0	0	0
Q(-17.03)N(+.98)CRRELQQ(+.98)MHGQLAGLRAR	1175.6	0.01	60	0	11.52		Pyro-glu from Q; Deamidation (NQ)	0	0	0	0	0	0	0	0	0	0	1230	0	0	0	0	0	0	0	0	0	0	0	0	0	0	0	0	0	0	0	0	0	0	0	0
KTTTVKT	778.465	0.01	60	9.4	10			0	1040	0	0	190	0	0	0	0	0	0	0	0	0	0	0	0	0	1780	0	0	0	0	0	614	0	7670	0	0	0	3970	0	0	0	0
TPNLLPPL	864.512	0.01	60	10.9	5.19			0	0	793	0	0	0	0	0	0	442	0	0	0	0	0	0	0	0	0	0	0	0	279	0	0	0	141	0	658	0	0	0	0	0	0
AMQNTKLLF	533.291	0.01	60	10.9	8.8			0	0	0	0	0	0	0	0	0	0	0	0	1020	0	215	0	0	0	0	559	0	0	0	547	0	0	0	0	0	0	0	0	0	1760	0
Q(-17.03)EKKAQ(+.98)LKIYKKFLKKAQDL	1216.74	0.02	60	10.8	10	sp|Q8WXH0|SYNE2_HUMAN	Pyro-glu from Q; Deamidation (NQ)	0	0	0	1080	0	0	157	0	0	0	0	0	0	0	0	0	0	0	0	0	0	0	1330	2420	0	2780	0	0	3220	0	0	1090	890	0	0
YTAGK	539.293	0.01	60	0	8.59			0	0	0	0	0	0	0	0	0	1240	0	0	0	0	0	0	0	0	0	0	0	0	0	0	0	0	0	0	0	0	0	0	0	0	0
SVYGSRKTLFVLAHTDRVSGLLRASFLLAQ(+.98)	1102.97	0.02	60	0	10.9		Deamidation (NQ)	0	0	0	0	0	1250	0	0	0	0	0	0	0	0	0	0	0	0	0	1560	0	0	0	0	0	0	0	0	0	0	0	0	0	0	0
SSKITHRIHWESA	517.937	0.02	60	7.1	8.51	sp|P01024|CO3_HUMAN		0	0	0	0	0	0	0	0	0	0	0	0	1250	0	0	0	0	0	0	1620	0	0	0	0	0	0	0	0	0	0	0	0	0	0	0
KHQKK	668.422	0.01	60	4.4	10.3			1250	0	0	0	0	0	0	0	0	0	0	0	0	0	0	0	0	0	0	0	0	0	0	0	0	2430	1190	253	0	0	0	0	0	0	0
QVCGT	507.221	0.01	60	0	5.52			0	0	0	0	0	0	0	0	0	0	0	0	0	0	0	0	0	1260	0	0	0	0	0	0	0	0	0	0	0	0	0	0	0	0	0
PTGKPGPKGT	470.267	0.01	60	0	10.02			0	0	0	0	0	0	0	0	0	0	0	1270	0	0	0	0	0	0	0	0	0	0	0	0	0	0	0	0	0	0	0	0	0	0	0
PLLFFPL	846.509	0.01	60	7.9	5.96			0	0	0	0	0	0	0	495	0	477	0	0	0	0	0	0	0	313	0	0	0	0	0	0	0	0	0	0	397	0	0	0	0	118	0
DSENPDHNEVPN(+.98)N(+.98)E	806.31	0.01	60	12.6	3.83		Deamidation (NQ)	0	0	0	0	674	0	0	0	611	0	0	0	0	0	0	0	0	0	0	0	0	0	0	0	2940	0	0	0	0	0	0	0	4310	0	0
YHTHYAQ(+.98)NR	595.782	0.01	60	0	8.6		Deamidation (NQ)	0	0	0	0	0	0	0	0	0	0	1290	0	0	0	0	0	0	0	0	0	0	0	0	0	0	0	0	0	0	0	0	0	0	0	0
KAALHPSPKTLT	632.381	0.01	60	7.6	10			0	0	0	0	0	0	0	0	0	0	0	0	0	0	1290	0	0	0	0	0	0	0	0	0	0	0	0	0	0	0	0	0	0	0	0
VTPAQQQEEPEMLWVTGP	680.666	0.01	60	8.2	3.67			0	0	0	0	1290	0	0	0	0	0	0	0	0	0	0	0	0	0	0	0	0	0	0	0	0	0	4320	1350	1100	2540	0	0	0	0	0
KAPPKPARAA	1006.62	0.04	1.96	7.8	11.17			0	0	427	0	59.3	0	0	0	0	59.1	0	191	160	0	0	0	397	0	311	0	90.2	0	0	0	0	216	384	225	0	0	0	329	0	48.2	150
DTDLEALFN(+.98)SVMN	490.559	0.03	60	7.1	3.49		Deamidation (NQ)	0	0	0	0	0	0	0	0	964	0	0	0	0	0	0	334	0	0	1870	0	0	387	0	0	0	0	0	0	0	0	0	0	593	0	0
QPPRISKAQK	1152.68	0.01	60	5.5	11.17			0	0	0	0	0	0	199	0	0	0	0	0	0	0	0	1100	0	0	0	0	761	527	1630	914	0	403	62.6	0	0	793	0	0	797	0	216
SSDSEVHSEA	524.214	0.07	60	7.3	4.13			0	0	0	0	0	0	0	0	0	1300	0	0	0	0	0	0	0	0	0	0	0	0	0	0	0	0	0	0	0	0	0	0	0	0	0
ELGDVQALSLWQ(+.98)KF	409.466	0.01	60	0	4.37		Deamidation (NQ)	0	0	0	0	0	0	0	0	0	0	0	0	1300	0	0	0	0	0	0	0	0	0	0	0	0	0	0	0	0	0	0	0	0	0	0
KSLKR	631.436	0.01	60	5.2	11.17			0	782	0	0	0	0	0	0	0	0	0	0	0	0	0	0	0	519	0	0	0	0	0	0	0	0	0	0	0	0	0	0	0	0	0
SAIN(+.98)VVKILRVLRVLRPLRAIN(+.98)RAKGLKHV	681.839	0.01	60	14.8	12.61		Deamidation (NQ)	0	0	0	0	402	0	149	0	0	0	0	0	0	0	329	0	425	0	0	0	0	0	200	0	0	0	0	976	0	0	0	0	0	0	0
SRATRPSAGITG	587.312	0.01	60	17.6	12			0	0	0	0	0	0	0	0	0	0	992	0	0	0	0	0	317	0	0	0	0	0	0	0	0	0	0	0	0	0	0	0	0	0	726
N(+.98)KAFRTN(+.98)FRLWSHFQ(+.98)S	681.343	0.01	60	8.7	12.01		Deamidation (NQ)	0	0	0	0	0	0	0	0	0	0	0	0	1310	0	0	0	0	0	0	0	0	0	0	0	0	0	0	0	0	0	0	0	0	0	0
VPPEWKALTDMPQM	821.903	0.01	60	0	4.37	sp|P02671|FIBA_HUMAN		0	0	0	0	0	0	0	0	0	0	0	1310	0	0	0	0	0	0	0	0	0	0	0	0	0	0	0	0	0	0	0	0	0	0	0
GEPKEVVKPVPITSPAVSKVTS	563.072	0.03	60	2.5	8.5			0	0	0	0	0	0	0	0	0	0	0	0	0	0	0	0	0	1310	0	0	2680	0	0	2490	0	0	0	0	0	0	0	0	0	0	0
E(-18.01)PKKIKK	426.791	0.01	60	7.6	10		Pyro-glu from E	0	0	0	0	0	0	0	0	0	0	0	0	1320	0	0	0	0	0	0	0	0	0	0	1450	0	0	0	0	0	0	0	0	0	0	1500
CCGGV	438.141	0.01	60	4	5.51			0	0	0	0	0	0	1320	0	0	0	0	0	0	0	0	0	0	0	6030	0	0	0	0	0	0	0	0	0	0	0	0	0	0	0	0
GAPALSN(+.98)GPQTQ(+.98)AQLLQ(+.98)PLQ	679.015	0.02	60	9.4	5.52		Deamidation (NQ)	0	0	0	0	0	0	0	0	0	0	0	0	1330	0	0	0	0	0	0	0	0	0	0	0	0	0	0	0	0	0	0	0	0	0	0
CVASNVAGTN	935.427	0.01	60	0	5.52			0	0	0	0	0	0	0	0	1330	0	0	0	0	0	0	0	0	0	0	0	0	0	0	0	0	0	0	0	0	0	0	0	0	0	0
PSGEPGM(+15.99)PGKDGQ(+.98)NG	482.202	0.01	60	0	4.37		Oxidation (M); Deamidation (NQ)	0	0	0	0	0	0	0	0	0	0	0	0	1330	0	0	0	0	0	0	0	0	0	0	0	0	0	0	0	0	0	0	0	0	0	0
LKGITAAVVIN(+.98)	1099.66	0.03	5.64	7.1	8.75		Deamidation (NQ)	0	0	0	1020	0	0	9.97	0	0	0	0	0	0	0	0	304	0	0	0	85.8	333	0	0	0	224	0	32.4	0	0	184	0	0	163	0	213
VTSLLRRVLPEVTPSRLASIIGVKSLPPA	768.222	0.01	60	14.4	11.71			0	0	0	367	0	968	0	0	0	0	0	0	0	0	0	0	0	0	0	0	0	0	0	1170	0	0	833	0	0	0	441	0	0	0	276
FRLLMDIN(+.98)LKAPVIIIPQ(+.98)SSVSPNAVIADL	813.235	0.01	5.31	11.6	5.96		Deamidation (NQ)	0	0	0	0	0	880	0	0	367	0	0	0	0	0	94.3	0	0	0	0	0	2850	0	0	0	948	0	0	0	0	4790	0	398	0	0	0
HVGALFPVCAAFVALAVALL	991.588	0.01	60	12	6.73			0	0	0	0	0	0	0	0	0	0	0	0	0	0	835	49.4	0	465	753	785	1490	0	419	0	0	0	0	458	0	0	0	0	464	0	525
S(+42.01)GYGAGDSCRSLSLSSSKSNSQ(+.98)ALN	840.377	0.01	60	6.6	7.92		Acetylation (Protein N-term); Deamidation (NQ)	0	0	0	0	0	0	0	0	0	0	1350	0	0	0	0	0	0	0	0	0	0	0	0	0	0	5740	0	0	0	0	0	0	0	0	0
LGATLFAALGLRSTLLTVLGA	1029.61	0.02	60	6.4	9.75			0	0	0	1350	0	0	0	0	0	0	0	0	0	0	0	0	0	0	0	355	456	2930	570	177	0	0	1720	241	0	871	0	0	1360	0	0
THLLVALFG	970.572	0.02	60	8.8	6.4			0	0	0	0	0	0	1150	0	0	206	0	0	0	0	0	0	0	0	0	0	0	0	796	146	0	223	0	0	914	496	0	0	0	0	0
SETATVSTT	448.709	0.04	60	10.1	4			0	0	0	0	0	0	0	0	0	1360	0	0	0	0	0	0	0	0	0	0	0	0	0	0	0	0	0	0	0	0	0	0	0	0	0
TATSEYQTFFNP	703.317	0.01	60	0	4			0	0	0	1360	0	0	0	0	0	0	0	0	0	0	0	0	0	0	0	0	0	0	0	0	0	0	0	0	0	0	0	0	0	0	0
CPCGSCCSW	945.27	0.01	60	0	5.5			0	0	0	0	0	0	0	0	1360	0	0	0	0	0	0	0	0	0	0	0	0	0	0	0	0	0	0	0	0	0	0	0	0	0	0
GSSVDAGCGTGSSGSACAT	787.794	0.01	60	19.9	3.8			0	0	0	0	0	1360	0	0	0	0	0	0	0	0	0	0	0	0	0	1950	0	0	0	0	0	0	0	0	0	0	0	0	0	0	0
DAEGESDLENSRKLLS	588.286	0.03	60	4.7	4.18			0	0	0	0	0	0	0	1360	0	0	0	0	0	0	0	0	0	0	0	0	2900	0	0	1570	0	0	0	0	0	0	0	0	0	0	6050
AQAEGKFAQ	475.234	0.02	60	5	6.05			0	0	0	0	0	0	0	0	0	0	0	491	0	0	0	871	0	0	0	0	0	0	0	0	0	0	0	0	660	0	0	0	0	673	0
Q(-17.03)IFLPEPEQP	590.794	0.09	60	10.9	3.79		Pyro-glu from Q	0	0	0	0	0	0	0	0	0	0	685	0	314	0	364	0	0	0	0	0	0	0	918	0	0	0	0	0	378	742	0	0	0	0	1420
PDSSEHTESADTSSCHTDSEN(+.98)TSSFSS	709.018	0.01	60	0.7	4.01		Deamidation (NQ)	0	0	0	544	0	0	0	0	0	0	0	0	0	0	0	0	825	0	0	0	0	0	0	0	0	0	0	0	0	0	0	0	0	0	0
GAGGGSGGGNGAGGGGAGGAGGGGGGGSRAPPEELSM	700.543	0.03	60	3.8	4.53			0	0	0	0	0	0	0	0	0	0	0	0	0	0	0	1370	0	0	0	0	0	0	0	0	0	0	0	0	0	0	0	0	0	0	0
CREGDIEK	949.447	0.02	60	11.8	4.68			0	0	0	0	0	0	0	0	1370	0	0	0	0	0	0	0	0	0	0	0	0	0	0	0	0	0	0	0	0	0	0	0	0	0	0
KRKVLGRR	1012.71	0.01	60	10.7	12.31			1380	0	0	0	0	0	0	0	0	0	0	0	0	0	0	0	0	0	0	0	0	0	0	0	0	0	0	743	0	0	0	0	0	0	0
YLNRRRQNEIMAKIQ(+.98)AAIIQIPKPASN(+.98)RTLK	910.047	0.01	60	9.6	11.58		Deamidation (NQ)	0	1380	0	0	0	0	0	0	0	0	0	0	0	0	0	0	0	0	3810	0	952	0	577	0	5110	0	2200	0	0	0	0	0	0	0	0
CTIRRLARHGGVKRILG	953.57	0.01	60	6.2	12			0	0	0	96.8	0	0	0	0	0	0	0	1290	0	0	0	0	0	0	0	0	0	0	0	25100	0	0	1810	0	0	0	0	0	0	0	0
ECQ(+.98)N(+.98)GPVCQ(+.98)RNAECINTAGSYR	805.999	0.01	60	4.1	6.21		Deamidation (NQ)	0	0	279	0	0	0	0	0	0	0	0	0	0	0	0	1110	0	0	0	0	0	0	0	0	0	0	1430	0	0	0	0	347	0	0	0
FLCTM	614.268	0.01	60	0	5.52			0	0	0	0	0	0	0	0	0	0	0	0	0	0	0	0	0	1390	0	0	0	0	0	0	0	0	0	0	0	0	0	0	0	0	0
SHAPA	482.248	0.01	60	10.4	6.46			0	0	0	0	0	0	0	0	0	0	0	0	0	0	0	1390	0	0	0	0	0	0	0	0	0	467	0	530	0	0	0	0	0	1250	0
E(-18.01)RVLIPV	807.495	0.02	60	8.6	6.1		Pyro-glu from E	0	0	0	0	0	0	0	0	418	993	0	0	0	0	0	0	0	0	0	0	0	0	0	0	0	0	0	0	0	0	0	196	0	0	0
GSGAPAGSGGK	423.21	0.01	60	10.8	8.75			0	0	0	0	0	0	0	0	0	0	0	0	0	688	725	0	0	0	0	0	0	0	0	0	0	0	0	0	0	0	650	0	0	0	0
PPAETPTD	827.375	0.01	60	0	3.67			0	0	0	1420	0	0	0	0	0	0	0	0	0	0	0	0	0	0	0	0	0	0	0	0	0	0	0	0	0	0	0	0	0	0	0
KDYEEVGADSADGEDEGEE	1022.39	0.03	60	12.6	3.51			0	583	0	0	0	0	0	839	0	0	0	0	0	0	0	0	0	0	0	0	965	0	0	0	0	0	0	0	0	0	0	0	0	0	0
SPPGKPQGPP	481.259	0.01	60	7.2	8.47			0	0	0	0	568	0	0	0	860	0	0	0	0	0	0	0	0	0	0	0	0	0	0	0	0	0	0	0	0	0	0	0	0	0	0
SLAPYAQDTQEKLN	789.402	0.01	60	0.9	4.37			0	0	0	0	0	0	0	0	0	1430	0	0	0	0	0	0	0	0	0	0	0	0	0	0	0	0	0	0	0	0	0	0	0	0	0
ATPVGAVPIR	980.609	0.04	1.73	5.4	9.79			0	0	0	70.2	0	196	0	0	310	113	0	165	45.8	280	108	0	142	0	633	140	110	0	0	443	0	0	0	0	0	0	0	148	0	0	0
ATTLPSPQM(+15.99)LKGKILVKGKKLPAN	850.532	0.01	60	7.2	10.6		Oxidation (M)	0	0	0	0	0	0	0	0	0	0	0	1430	0	0	0	0	0	0	0	0	0	0	0	1640	0	0	0	0	0	0	0	0	0	0	0
N(+.98)ASADGNIGTIEDGSDSENIQ(+.98)AN(+.98)GIPGT	907.387	0.01	60	8.9	3.33		Deamidation (NQ)	0	0	1430	0	0	0	0	0	0	0	0	0	0	0	0	0	0	0	213	0	0	0	0	0	0	0	1740	0	0	0	0	2700	0	0	0
HGLTPLLLGVHEQKQ(+.98)QVVKFLIKKKA	985.267	0.01	60	7.7	10.18		Deamidation (NQ)	0	0	0	0	271	0	0	185	0	0	0	0	0	0	0	0	0	976	0	0	305	0	0	298	0	1770	768	53.1	0	0	440	0	0	743	0
MAAAGG	477.212	0.01	60	0	5.28			0	0	0	0	0	0	1440	0	0	0	0	0	0	0	0	0	0	0	0	0	0	0	0	0	0	0	0	0	0	0	0	0	0	0	0
SMADVGLAQ(+.98)NVG	581.766	0.01	60	0	3.8	sp|Q86WI1|PKHL1_HUMAN	Deamidation (NQ)	0	0	0	0	0	0	0	0	0	0	1440	0	0	0	0	0	0	0	0	0	0	0	0	0	0	0	0	0	0	0	0	0	0	0	0
EGSETTSASTT	1070.44	0.01	60	15.5	3.8			0	1440	0	0	0	0	0	0	0	0	0	0	0	0	0	0	0	0	0	0	0	0	0	0	0	0	2140	0	0	0	0	0	0	0	0
AASKVAVP	742.459	0.01	60	10.2	8.8			0	0	0	0	0	0	0	1450	0	0	0	0	0	0	0	0	0	0	0	0	0	0	0	0	360	0	0	0	0	0	0	0	0	0	0
KTFIAVLLT	1005.63	0.01	1.48	11	8.75			0	0	111	0	322	0	273	0	0	18.5	0	0	105	627	0	0	0	0	0	0	0	0	0	268	95.8	335	0	0	0	0	0	0	0	138	0
CQLQPNACHNGGTCFN(+.98)TLGGHS	565.735	0.03	60	1	6.89		Deamidation (NQ)	0	0	1080	0	0	0	0	0	0	0	0	0	0	0	377	0	0	0	0	0	0	0	0	0	0	0	0	149	0	0	0	0	0	0	0
KPRGRGRGR	520.33	0.02	60	1.4	12.48			0	0	0	0	1460	0	0	0	0	0	0	0	0	0	0	0	0	0	0	0	0	0	0	0	0	0	0	0	0	0	0	0	0	0	0
GHRPLDKKREEAPSLRPAPPPISGGGYRA	622.74	0.01	60	0	10.26	sp|P02675|FIBB_HUMAN		0	0	0	0	0	0	0	0	0	0	0	0	1460	0	0	0	0	0	0	0	0	0	0	0	0	0	0	0	0	0	0	0	0	0	0
AGPTN(+.98)YSNPVYAKLYM(+15.99)	452.23	0.01	60	4	8.47		Deamidation (NQ); Oxidation (M)	0	0	0	0	0	0	1460	0	0	0	0	0	0	0	0	0	0	0	984	0	0	0	0	0	0	0	0	0	0	0	0	0	2130	0	0
TCNAN(+.98)GTMYGCSCDQ(+.98)G	542.844	0.07	60	5.7	3.8		Deamidation (NQ)	0	0	0	0	0	0	0	0	0	0	0	0	1460	0	0	0	0	0	10100	1840	0	3980	0	0	0	0	0	0	0	2090	0	0	5390	0	0
E(-18.01)KPGGKKVAV	994.609	0.01	5.34	10.3	9.71		Pyro-glu from E	0	0	134	393	270	0	0	0	0	194	0	105	0	0	0	76	291	0	0	0	0	117	0	0	0	0	0	0	28.3	0	0	0	46.9	0	0
TLSLKRFAN	525.321	0.03	60	10.5	11			0	0	0	0	0	0	0	0	0	0	0	0	1470	0	0	0	0	0	0	0	0	0	0	3170	0	1660	1000	0	0	0	0	0	1870	0	0
VGLVLGAF	775.468	0.03	60	6.8	5.49			0	0	977	0	0	241	0	0	253	0	0	0	0	0	0	0	0	0	0	0	0	0	353	1360	0	0	0	0	0	0	0	0	152	32.9	3100
KMADEAGSEADHEGTHSTKRGHA	606.273	0.01	60	4.2	5.78	sp|P02671|FIBA_HUMAN		0	0	0	0	0	209	0	0	0	0	0	0	0	1270	0	0	0	0	0	0	2740	0	0	0	0	811	0	0	0	0	0	0	0	0	0
TQVNTQAEQLR	644.337	0.01	60	0	5.66			0	0	0	0	0	0	0	0	0	1480	0	0	0	0	0	0	0	0	0	0	0	0	0	0	0	0	0	0	0	0	0	0	0	0	0
CPGDCSGHG	832.241	0.01	60	14.4	5.08			0	0	0	0	0	0	0	0	0	0	0	0	0	0	1480	0	0	0	0	0	0	0	0	0	0	0	0	0	910	0	0	0	0	0	0
KSVREKG	803.491	0.03	60	6.5	9.99			0	0	0	0	0	0	452	0	0	944	0	0	0	0	88.1	0	0	0	0	0	0	0	465	0	464	0	0	61.4	0	0	0	0	0	0	0
GPQ(+.98)GQ(+.98)PGLPGPPGPPGP	754.877	0.02	60	9.5	5.52		Deamidation (NQ)	0	0	0	0	0	0	0	0	0	0	1490	0	0	0	0	0	0	0	0	0	0	0	0	0	0	0	0	0	0	0	0	0	0	0	0
TAGPSAQ(+.98)AALPT	543.281	0.01	60	0	5.19		Deamidation (NQ)	0	0	0	0	0	0	0	0	0	1490	0	0	0	0	0	0	0	0	0	0	0	0	0	0	0	0	0	0	0	0	0	0	0	0	0
AGVVL	458.309	0.01	60	0	5.57			0	0	0	0	0	0	0	0	0	0	0	0	0	1490	0	0	0	0	0	0	0	0	0	0	0	0	0	0	0	0	0	0	0	0	0
QLN(+.98)CSVNGSSSYHSDDDDDDDDDDDDDN(+.98)	774.261	0.02	60	9.2	3.22		Deamidation (NQ)	0	0	0	0	0	0	0	0	0	0	0	0	0	1490	0	0	0	0	3970	0	0	945	0	0	0	0	0	0	0	0	0	0	0	0	0
E(-18.01)LAGSPFPVTR	578.314	0.01	60	9	6.1		Pyro-glu from E	0	0	0	0	0	0	0	0	0	1500	0	0	0	0	0	0	0	0	0	0	0	0	0	0	0	0	0	0	0	0	0	573	0	3870	0
TKAATILTKS	1033.62	0.04	60	11.7	10			376	0	184	0	320	0	0	424	0	95.4	0	115	0	0	0	0	0	0	91	0	0	66	0	0	0	0	0	0	15.2	417	0	0	0	366	0
KTGQIANCALPCHNPFFSQ(+.98)DERAFTVFWIGLWSVLCFVST	907.634	0.01	60	10.5	6.73		Deamidation (NQ)	0	599	0	0	0	0	0	0	0	0	0	0	607	0	310	0	0	0	0	0	995	0	0	0	0	0	784	0	0	0	0	0	0	1270	1860
IHGIALLSEL	533.316	0.01	60	21.1	5.24			0	0	0	0	0	0	0	0	0	0	0	0	0	1520	0	0	0	0	0	554	0	0	0	2880	0	0	0	0	0	0	0	0	0	0	0
RRLRN(+.98)LGQPV	1209.72	0.04	60	10.7	12.3		Deamidation (NQ)	0	0	0	0	0	0	92.4	0	0	0	0	0	0	0	1430	0	0	0	0	400	1580	257	932	0	659	75	221	458	0	489	215	0	0	0	675
GPHPSCCSA	429.666	0.05	60	12.7	6.72			0	0	0	0	0	0	828	0	0	0	0	0	0	0	0	0	0	698	0	0	0	1770	0	0	0	0	0	0	0	0	0	0	0	0	0
SYKMADEAGSEADHEGTHSTKRGHAKSRP	628.898	0.01	60	4.5	6.79	sp|P02671|FIBA_HUMAN		0	0	0	0	0	347	0	0	0	0	0	0	1180	0	0	0	0	0	1910	0	0	0	0	0	0	0	0	145	0	0	0	0	0	0	0
RPGPPPVRQ	502.301	0.01	60	2.8	12			0	0	0	0	1530	0	0	0	0	0	0	0	0	0	0	0	0	0	0	0	0	0	0	0	0	0	0	852	651	0	0	0	0	0	0
TAEPSWGPQDEGSEPPTT	629.271	0.03	60	6.5	3.5			0	0	0	1530	0	0	0	0	0	0	0	0	0	0	0	0	0	0	0	0	0	0	0	4830	0	0	0	0	0	0	0	2170	0	2140	0
CTLTAHEGRGGKCTEEGDASQ(+.98)QEGCTLGSDPICLSESQVSEEQ(+.98)EEMGGQ(+.98)SSA	1070.62	0.01	60	16.3	3.99		Deamidation (NQ)	0	0	0	0	0	0	0	0	0	0	0	0	0	0	1540	0	0	0	0	0	1450	0	0	0	0	0	0	0	0	0	0	0	0	0	0
E(-18.01)EIRPSSVVSKKGYLHFK	696.061	0.01	60	5.8	9.53		Pyro-glu from E	0	0	0	0	0	0	0	0	0	0	0	0	0	0	0	0	1540	0	0	0	0	0	0	0	0	0	0	0	0	0	0	0	2350	0	0
M(+15.99)SCDSRAPAAACPAGQV	550.907	0.04	60	4.9	5.58		Oxidation (M)	0	0	0	0	0	0	0	0	0	0	1540	0	0	0	0	0	0	0	0	0	892	0	0	2600	0	0	0	0	0	0	0	0	0	964	0
E(-18.01)KRVLGLVLLRGENLVSMTVE	779.782	0.01	60	12.8	6.33		Pyro-glu from E	0	0	0	0	0	0	0	0	0	1540	0	0	0	0	0	0	0	0	4880	2390	0	0	0	1810	554	2590	0	1760	0	0	0	0	0	0	0
GSSDN	479.166	0.02	60	7.1	3.8			0	1160	0	0	387	0	0	0	0	0	0	0	0	0	0	0	0	0	0	0	0	0	0	0	0	0	0	0	0	0	0	0	0	0	0
QDLSSCAGRCGEGYSRDATCNCDYNCQ(+.98)HY	644.843	0.01	60	6.1	4.66		Deamidation (NQ)	0	0	0	0	1550	0	0	0	0	0	0	0	0	0	0	0	0	0	0	0	0	0	0	0	0	0	0	957	0	0	1900	0	0	0	0
RAWLARRRFQSIRRFVLN(+.98)IQLTYRVQRLQKK	1001.1	0.01	60	10.5	12.48		Deamidation (NQ)	0	0	0	0	0	0	0	0	0	0	0	0	0	0	1550	0	0	0	0	0	0	0	0	0	3880	0	0	0	546	0	0	0	0	0	0
SEMVVAGKLQD	588.799	0.02	60	1.2	4.37			0	0	0	0	0	0	1560	0	0	0	0	0	0	0	0	0	0	0	1810	0	0	0	0	0	0	0	0	0	0	0	0	0	0	0	0
SQDDCGDGSDEEN	685.72	0.04	60	4.3	3.25			0	0	0	0	0	0	0	0	0	0	0	0	1570	0	0	0	0	0	7210	0	0	1890	0	0	0	0	0	0	0	0	0	0	6840	0	0
IVPAN(+.98)RVKLLPAGPAPKPSLSPASP	496.498	0.01	60	0	11.17		Deamidation (NQ)	0	0	0	0	0	0	0	0	0	1580	0	0	0	0	0	0	0	0	0	0	0	0	0	0	0	0	0	0	0	0	0	0	0	0	0
TAKN(+.98)TKLDDLFLK	503.286	0.01	60	2.7	8.17		Deamidation (NQ)	0	0	0	0	0	0	0	0	0	0	1580	0	0	0	0	0	0	0	0	0	0	0	0	0	0	0	0	0	0	0	0	0	0	0	0
SAVQAAHLGTLCSQ(+.98)SLPLAASLKHT	835.771	0.01	60	4.8	7.99		Deamidation (NQ)	1580	0	0	0	0	0	0	0	0	0	0	0	0	0	0	0	0	0	0	0	0	539	0	0	0	0	0	1570	0	0	0	0	0	0	0
GEPGPPGLPGPPGPKGEAGVDGQVGPPGQPGDKGERGAAGEQ(+.98)GPDGPKGSKGEPGKGEM(+15.99)V	1116.74	0.01	60	13.7	4.65		Deamidation (NQ); Oxidation (M)	0	0	380	0	1210	0	0	0	0	0	0	0	0	0	0	0	0	0	0	0	0	0	0	0	0	0	0	0	0	0	0	0	0	0	0
MYGAQ	569.239	0.01	60	2.9	5.27			0	0	0	0	0	0	0	0	0	0	0	0	0	0	0	0	0	1590	0	0	0	0	0	0	0	0	0	0	0	0	0	0	0	0	0
CIVKRTEKRLRKAIRTLRK	592.872	0.01	60	3.6	11.84			0	0	0	0	0	0	0	0	0	0	0	0	0	1590	0	0	0	0	0	452	979	0	0	0	1310	0	0	0	0	0	0	0	0	0	0
STQ(+.98)EIEACLQDFDN(+.98)M(+15.99)TWEIECT	656.748	0.01	60	6.7	3.34		Deamidation (NQ); Oxidation (M)	0	0	0	0	0	0	0	1590	0	0	0	0	0	0	0	0	0	0	8360	0	0	0	0	0	0	0	0	0	0	31800	739	0	0	0	0
YKMADEAGSEADHEGTHSTKRGHA	517.834	0.06	60	2.4	5.78	sp|P02671|FIBA_HUMAN		0	0	0	465	0	0	0	0	0	0	0	0	0	1130	0	0	0	0	0	0	909	0	0	0	0	537	0	0	0	0	0	0	0	0	0
RAGLGLLLGT	970.588	0.06	2	10.3	9.75			278	0	173	0	0	0	3.47	0	205	462	0	0	426	49.8	0	0	0	0	0	0	0	125	492	658	261	187	0	0	254	377	0	104	0	535	0
QGCFPSSASAP	1051.46	0.01	60	0	5.52			0	0	0	0	0	0	0	0	0	0	0	0	0	0	1600	0	0	0	0	0	0	0	0	0	0	0	0	0	0	0	0	0	0	0	0
KQFTSSTSYNRGDSTFESKS	565.016	0.01	60	3.6	8.5	sp|P02671|FIBA_HUMAN		0	0	0	0	0	0	0	0	0	0	0	0	1600	0	0	0	0	0	3690	0	0	0	0	0	0	0	0	0	0	0	0	0	0	0	0
SLDRNLPSDSQDLGQHG	613.622	0.02	60	10.1	4.41			0	0	0	0	0	0	0	0	0	0	1600	0	0	0	0	0	0	0	0	0	0	0	2070	10700	0	0	0	0	0	0	0	0	0	0	0
QKCPNN(+.98)M(+15.99)Q(+.98)YHECRSPCADTCS	811.636	0.01	60	0	6.72	sp|P98088|MUC5A_HUMAN	Deamidation (NQ); Oxidation (M)	0	0	0	1610	0	0	0	0	0	0	0	0	0	0	0	0	0	0	0	0	0	0	0	0	0	0	0	0	0	0	0	0	0	0	0
LEDKTERELLESY	542.273	0.01	60	5.4	4.25			0	0	0	0	1610	0	0	0	0	0	0	0	0	0	0	0	0	0	0	0	0	0	0	0	0	1150	0	0	0	0	0	0	0	0	0
QN(+.98)GWHCVCQ(+.98)PGWRGAGCDVAM(+15.99)ETLCT	710.788	0.01	60	15.7	5.32		Deamidation (NQ); Oxidation (M)	0	0	1610	0	0	0	0	0	0	0	0	0	0	0	0	0	0	0	0	0	1420	0	0	1540	0	0	833	0	723	0	0	0	0	3430	0
IPKNGIEKH	1035.61	0.05	5.57	8.2	8.6			0	0	279	0	0	0	0	0	0	716	0	0	0	0	0	622	0	0	0	284	234	261	1940	0	2140	0	324	0	761	387	296	0	252	0	0
Q(+.98)SGALDPELKVSPKEAGSMGSRM(+15.99)AELCQWEI	841.891	0.03	60	7.3	4.59		Deamidation (NQ); Oxidation (M)	0	0	0	0	0	0	0	0	0	1620	0	0	0	0	0	0	0	0	0	0	0	0	5860	0	0	0	0	0	0	0	0	0	0	2140	3170
E(-18.01)SPQN	556.23	0.05	60	1.4	4	sp|Q14686|NCOA6_HUMAN	Pyro-glu from E	0	997	0	0	0	625	0	0	0	0	0	0	0	0	0	0	0	0	0	0	0	0	0	0	0	0	538	0	358	0	0	0	0	0	0
TMYGCDM	410.637	0.03	60	6.5	3.8			0	0	672	0	0	952	0	0	0	0	0	0	0	0	0	0	0	0	0	0	0	0	0	0	0	0	0	482	0	0	611	0	0	0	0
KKVAEIHQ(+.98)ALNSDPTDVAALRRMA	659.608	0.01	60	13	8.6		Deamidation (NQ)	0	0	0	0	0	0	0	0	0	0	0	0	0	1630	0	0	0	0	0	621	0	0	0	0	0	0	0	0	0	0	0	0	707	0	0
SSTKLGTQVQL	581.328	0.01	60	0	8.47			0	0	0	0	0	0	0	0	0	0	0	1640	0	0	0	0	0	0	0	0	0	0	0	0	0	0	0	0	0	0	0	0	0	0	0
APSSN	475.213	0.02	60	6.3	5.57			0	0	0	0	0	0	0	0	0	0	0	0	0	0	0	0	0	1650	0	0	0	0	0	0	0	0	0	0	0	0	0	0	0	0	0
DAHKSEVAHRFKDLGEENF	558.02	0.02	60	11.8	5.39			0	0	0	0	0	0	0	0	0	1650	0	0	0	0	0	0	0	0	0	0	0	0	0	0	0	0	0	0	0	0	0	0	0	0	0
S(+42.01)ETAPAAPAAPAPAEKTPVK	649.344	0.03	60	4.8	5.86		Acetylation (Protein N-term)	0	0	0	0	0	0	0	0	0	1650	0	0	0	0	0	0	0	0	0	0	0	0	0	0	0	0	0	0	0	0	0	762	0	0	0
HVLKALN	794.491	0.03	60	8.6	8.76			0	0	510	274	0	400	0	0	0	0	0	0	0	0	0	0	467	0	2840	1280	6830	0	2000	0	0	0	0	0	0	0	0	0	534	0	0
GVLHVPIT	835.506	0.02	60	11	6.74			0	0	0	0	0	0	0	0	0	542	0	0	0	0	0	0	0	1110	0	0	0	0	0	0	1330	0	0	0	0	0	0	0	0	0	0
EEVSGNVSPGTRREYHTEKLVTS	644.572	0.03	60	4	5.57	sp|P02671|FIBA_HUMAN		0	0	0	0	0	0	0	0	0	0	0	0	1660	0	0	0	0	0	2780	525	0	0	0	0	0	0	0	0	0	0	1020	0	0	0	0
VESYG	554.244	0.03	60	12.3	4			0	0	0	0	0	0	0	0	0	0	1670	0	0	0	0	0	0	0	0	0	0	101	0	0	0	0	0	0	0	0	0	0	0	0	0
Q(-17.03)PPVGIAVALA	1018.59	0.01	60	8.8	5.52		Pyro-glu from Q	0	0	0	0	0	0	0	0	0	183	0	0	0	0	0	1500	0	0	0	0	0	206	0	0	0	0	0	0	706	206	0	0	0	0	0
PAAAGG	443.224	0.03	60	4.9	5.96			1240	0	0	0	0	0	0	0	0	451	0	0	0	0	0	0	0	0	2000	894	0	0	1850	1440	0	0	0	0	0	1320	0	0	1380	262	0
KPIAVLCLTV	1056.65	0.02	2.6	7.7	8.22			0	0	0	313	558	0	49.2	0	28.2	93.3	0	0	0	0	0	654	0	0	0	0	0	0	0	63.5	5.62	323	6.94	0	158	0	0	0	0	0	0
STCDICQFGAECDEDAEDVWCVCNIDCSQT	661.244	0.01	60	3.1	3.16			0	0	0	0	0	0	1700	0	0	0	0	0	0	0	0	0	0	0	0	1720	0	0	0	0	0	0	0	0	0	0	0	0	0	0	0
E(-18.01)GGGEA	501.193	0.01	60	4	3.8		Pyro-glu from E	0	0	0	0	0	0	0	0	0	0	0	0	0	0	0	0	1700	0	0	0	0	0	0	0	0	0	0	0	776	19400	0	0	0	0	0
KGPGPGGPGGAGVARGGAGGGP	563.291	0.03	60	6.1	11			0	0	0	0	0	0	0	0	0	0	0	0	1710	0	0	0	0	0	0	0	0	0	0	0	0	0	0	0	0	461	0	0	812	0	0
PGATCP	545.241	0.01	60	2.3	5.91			0	0	0	0	0	0	0	0	0	1710	0	0	0	0	0	0	0	0	0	0	0	0	0	1460	0	0	0	0	0	0	0	0	0	0	0
RHQGVMVGMGQKDSYVGDEAQSKRGILT	610.308	0.04	60	4.7	8.5			0	0	0	0	0	0	0	1710	0	0	0	0	0	0	0	0	0	0	0	0	0	0	0	0	0	0	0	1490	0	0	0	0	0	2280	5450
GQKDSYVGDEAQSKRGILTL	722.376	0.01	60	2.9	6.12			0	0	0	0	0	0	0	0	0	0	0	0	0	1710	0	0	0	0	0	0	0	0	0	0	0	0	0	0	0	0	0	3140	0	1970	17300
LFPPVPLF	929.566	0.03	2.74	7.8	5.52			0	0	0	378	0	0	0	0	0	221	0	0	0	329	247	0	0	537	142	0	0	0	134	97.1	0	1250	304	0	197	0	0	0	0	0	0
VRANVAEGGRR	592.833	0.02	60	5	11.7			0	0	0	0	0	0	0	0	0	0	0	0	1190	0	0	534	0	0	0	0	0	0	0	0	0	0	0	0	0	0	0	0	0	0	0
E(-18.01)QLQNIISKFLPPVLLKLSSTQEGVRKKVM	852.245	0.02	60	9.4	10		Pyro-glu from E	0	1390	0	0	0	339	0	0	0	0	0	0	0	0	0	0	0	0	0	0	0	0	1130	0	1040	762	1220	0	193	0	0	0	0	0	0
AGSFGMNPQGAPWGQGGNGGPPNFGTNTQGAVAQ(+.98)PGYGSVRASN(+.98)QNEGCT	971.216	0.01	60	8.4	6.04		Deamidation (NQ)	0	0	0	0	0	0	0	0	0	0	1730	0	0	0	0	0	0	0	0	0	0	0	0	839	0	0	0	0	0	0	0	0	0	0	0
DN(+.98)EEGFF	858.31	0.01	60	11.4	3.57	sp|P02675|FIBB_HUMAN	Deamidation (NQ)	0	0	0	0	0	0	0	1740	0	0	0	0	0	0	0	0	0	0	0	0	0	0	3890	0	0	0	0	0	0	0	0	0	0	0	0
AILAGLGTSLLQ(+.98)VILQ(+.98)VVIPRLAVISINQVVAQ(+.98)AV	896.547	0.01	60	4	9.79		Deamidation (NQ)	0	0	0	1740	0	0	0	0	0	0	0	0	0	0	0	0	0	0	0	1280	1430	0	0	5500	0	182	0	0	2220	0	0	0	0	0	0
PCGGGS	477.174	0.03	60	1.8	5.91			0	0	0	0	0	0	0	0	0	0	0	0	1740	0	0	0	0	0	3000	0	0	0	0	0	0	0	0	0	0	0	0	0	11200	0	0
LKKFQVT	863.535	0.01	60	5.2	10			0	0	327	0	0	0	0	0	0	491	0	0	362	0	0	0	566	0	0	0	0	0	0	0	0	0	0	0	0	0	0	0	0	0	0
HPGQGGPRGRPGYDGCN(+.98)GTQGDSGPQGPPGSEGFTGPPGPQGPKGQKG	1142.78	0.01	60	1.5	8.18		Deamidation (NQ)	0	0	733	0	0	0	0	0	1020	0	0	0	0	0	0	0	0	0	0	0	0	0	0	0	0	0	0	0	0	0	0	0	0	0	0
TEGASP	561.239	0.01	60	0	4	sp|P22105|TENX_HUMAN		0	0	0	0	0	0	0	0	0	0	0	0	0	1760	0	0	0	0	0	0	0	0	0	0	0	0	0	0	0	0	0	0	0	0	0
Q(-17.03)CACNP	618.197	0.05	60	4.8	5.51		Pyro-glu from Q	0	0	0	418	0	0	0	183	0	0	0	0	0	0	468	711	0	0	0	0	1750	0	0	0	0	2530	56.4	283	89.2	5300	213	141	0	0	0
QIALHALSL	965.577	0.05	3.15	11	6.74			849	0	0	0	0	0	0	0	0	122	0	426	0	200	0	0	186	0	0	42.3	285	114	748	0	0	16.9	283	147	0	974	0	0	369	0	279
GKASIKLSET	517.303	0.03	60	11.6	8.59			0	0	0	0	0	0	0	0	0	1800	0	0	0	0	0	0	0	0	0	0	0	0	0	0	0	0	0	0	0	0	0	0	0	0	0
SKALADVVI	915.561	0.04	2.9	7.3	5.55			0	0	507	0	0	0	0	0	0	202	0	0	0	0	0	301	790	0	399	0	0	142	0	0	479	0	0	0	240	0	0	449	0	0	0
VLVFAIQKSD	560.323	0.01	60	5.4	5.81			0	0	0	0	0	0	0	0	0	1800	0	0	0	0	0	0	0	0	0	0	0	0	0	0	0	0	0	0	0	0	0	0	0	0	13300
PLPPK	551.359	0.01	60	4.5	9.18			0	0	0	0	0	0	0	0	0	0	0	0	0	980	0	0	823	0	0	0	0	0	0	0	0	0	0	0	0	0	0	2300	0	0	638
DSDGASGD	723.242	0.02	60	6	3.42			0	0	0	172	0	0	0	0	0	0	0	676	743	0	0	0	0	217	0	0	0	0	0	0	0	0	0	1.18	0	0	0	0	0	0	0
FLPLVAMVLLV	1214.74	0.04	60	9.2	5.52			0	0	0	0	0	943	866	0	0	0	0	0	0	0	0	0	0	0	5930	614	2300	1970	1210	2580	1670	985	536	1240	789	0	0	0	580	1610	0
RAGLVSVNLL	1041.63	0.03	5.41	7.7	9.75			0	0	484	0	786	0	0	0	0	60.8	0	0	0	0	479	0	0	0	1740	0	401	934	0	1400	0	0	70.6	0	226	85.6	0	67.3	0	0	1.9
SLASQ(+.98)GTLQVQLSRAN(+.98)EDPEHPHANH	710.344	0.11	60	5.1	5.72		Deamidation (NQ)	0	0	0	0	0	0	0	0	0	0	0	0	0	0	0	1810	0	0	0	1110	0	0	0	0	0	0	0	0	590	0	0	0	0	0	0
GDLTF	552.262	0.02	60	10.1	3.8			0	0	0	0	0	0	0	0	0	1820	0	0	0	0	0	0	0	0	0	0	0	0	0	0	0	0	0	0	0	0	0	0	0	0	0
HWESASLLR	549.793	0.01	60	9.7	6.75	sp|P01024|CO3_HUMAN		0	0	0	0	1820	0	0	0	0	0	0	0	0	0	0	0	0	0	0	0	0	0	0	472	0	0	0	0	0	0	0	0	0	0	0
PSKPSPLVV	923.571	0.02	5.29	10	9.18			0	0	0	0	0	126	0	0	0	1130	0	0	0	0	152	0	419	0	736	0	0	0	289	0	196	196	124	0	0	160	0	0	0	0	0
DFGPC	538.208	0.03	60	9.8	3.8			0	0	0	0	0	0	0	0	0	1830	0	0	0	0	0	0	0	0	0	0	0	0	0	0	0	0	0	0	0	0	0	0	0	0	0
EGGPEAPIPPPPQPREKVS	661.346	0.01	60	7.2	4.79	sp|Q15942|ZYX_HUMAN		0	0	0	0	0	0	0	0	0	0	0	0	0	0	0	0	1830	0	0	0	0	0	753	0	0	0	0	0	0	0	0	0	0	0	0
Q(+.98)AIQ(+.98)MACQSLGEPGCTQAQVLS	567	0.01	60	6.5	4		Deamidation (NQ)	0	0	0	0	0	0	0	0	0	0	0	0	0	0	1830	0	0	0	0	0	0	0	0	0	0	0	0	0	1610	0	0	0	0	0	0
S(+42.01)GSGGGGSGGGGGGGSSG	413.166	0.02	60	4.1	5.24		Acetylation (Protein N-term)	0	0	0	0	0	0	0	0	0	0	0	0	1830	0	0	0	0	0	0	0	0	4090	0	0	0	0	0	0	0	0	0	0	0	0	0
KMADEAGSEADHEGTHST	468.947	0.1	60	3.8	4.49	sp|P02671|FIBA_HUMAN		0	0	0	449	0	0	0	0	0	0	0	274	0	1110	0	0	0	0	580	0	667	0	329	0	0	429	0	0	0	0	0	0	0	0	0
TCQDVDECQ(+.98)QN	642.225	0.01	60	0	3.49		Deamidation (NQ)	0	0	0	0	0	0	0	0	0	0	1840	0	0	0	0	0	0	0	0	0	0	0	0	0	0	0	0	0	0	0	0	0	0	0	0
YSLGLVSSY	988.511	0.01	60	0	5.52			0	0	0	0	0	0	0	0	0	0	0	0	0	0	0	0	1840	0	0	0	0	0	0	0	0	0	0	0	0	0	0	0	0	0	0
DGCNHCT	749.216	0.01	60	0	5.08			0	0	0	1840	0	0	0	0	0	0	0	0	0	0	0	0	0	0	0	0	0	0	0	0	0	0	0	0	0	0	0	0	0	0	0
TKIVSVERREKIKKSL	479.3	0.03	60	1.3	10.45			0	0	0	0	0	0	0	0	0	0	0	0	1840	0	0	0	0	0	0	0	0	0	0	0	0	0	0	0	0	930	0	0	0	0	0
FSLQ(+.98)SSQGSSVDAGCGTG	563.573	0.04	60	1.9	3.8		Deamidation (NQ)	1840	0	0	0	0	0	0	0	0	0	0	0	0	0	0	0	0	0	0	0	0	0	0	0	0	0	0	0	0	3130	827	0	0	0	0
LLVLITGGK	457.32	0.06	60	5.1	8.75			0	0	0	0	1840	0	0	0	0	0	0	0	0	0	0	0	0	0	0	0	0	0	4680	6000	6150	0	5540	0	0	3180	5280	0	2600	0	2760
EMPPLEGDDDTSRMEEVD	1032.92	0.02	60	3.5	3.58			0	0	0	0	0	0	0	0	0	0	0	0	0	0	1850	0	0	0	0	0	2650	0	0	0	0	1320	1660	0	0	0	0	0	0	0	0
STQ(+.98)AQSVPVIN(+.98)SMGSSLTTLQPVQ(+.98)FSQP	587.894	0.02	60	5.1	5.24		Deamidation (NQ)	0	0	0	0	0	0	0	0	0	0	0	0	0	0	0	0	1860	0	0	0	6660	0	7380	10000	0	0	0	0	0	0	0	3320	0	7320	0
QGSDLEM(+15.99)RNCQ(+.98)N(+.98)KPCPVDGSWSEWSLWEEC	1177.82	0.03	60	16.2	4.08		Oxidation (M); Deamidation (NQ)	0	0	0	0	909	0	0	0	0	0	0	0	0	0	0	967	0	0	0	0	0	0	0	0	660	0	0	0	0	0	0	0	0	0	0
LKGPKGLGFSIAGGIG	736.44	0.02	60	9.3	10			0	0	0	0	0	1880	0	0	0	0	0	0	0	0	0	0	0	0	0	0	9940	7270	0	0	8920	1250	0	0	3560	0	0	0	0	0	33100
ISFGIHSSAISVVKILRVLRVLRP	665.918	0.03	60	7.9	12.3			0	987	0	0	0	0	897	0	0	0	0	0	0	0	0	0	0	0	2400	0	0	2140	0	0	0	0	1720	0	0	0	0	0	0	0	0
HVPLALCVLR	1120.69	0.02	4.53	11.9	8.26			0	0	0	413	368	108	565	0	0	212	0	0	0	0	223	0	0	0	0	0	0	0	0	0	1870	78.6	0	0	0	194	0	0	0	1220	0
EEYPDRIMNTF	707.816	0.02	60	5.4	4.14			0	0	0	0	0	0	1890	0	0	0	0	0	0	0	0	0	0	0	0	795	0	0	0	0	0	0	0	0	0	0	0	0	0	0	0
KERELEEARKKLAQIRQQQ	596.086	0.03	60	3	9.69			0	0	0	0	0	0	0	0	0	0	0	0	0	0	0	1890	0	0	0	0	6380	0	0	3390	0	0	0	0	0	0	0	0	0	0	4390
YAIILAPT	861.521	0.01	60	9.2	5.52			283	0	0	0	0	0	0	0	958	650	0	0	0	0	0	0	0	0	0	0	196	0	0	0	0	963	0	0	824	0	0	0	353	0	0
AQIIRQVQ(+.98)AV	1126.67	0.03	60	8.3	9.79		Deamidation (NQ)	0	0	0	0	148	0	77.2	0	0	1670	0	0	0	0	0	0	0	0	705	61.3	0	0	496	154	0	0	17.8	157	0	0	137	0	0	173	245
VGGDQLNCHFGS	1233.52	0.01	60	0	5.08			0	1900	0	0	0	0	0	0	0	0	0	0	0	0	0	0	0	0	0	0	0	0	0	0	0	0	0	0	0	0	0	0	0	0	0
GCICQPGY	840.325	0.01	60	10.7	5.51			0	0	0	0	0	0	0	0	0	0	0	0	1900	0	0	0	0	0	2180	716	0	715	0	0	0	0	0	0	0	0	0	0	0	0	0
ERQ(+.98)QLSKVAQQLEQ	422.228	0.01	60	0	6.24		Deamidation (NQ)	0	0	0	0	0	0	0	0	0	1910	0	0	0	0	0	0	0	0	0	0	0	0	0	0	0	0	0	0	0	0	0	0	0	0	0
LMN(+.98)LGESFIQTN(+.98)DPSLKLFQ(+.98)CA	1236.58	0.01	60	0	4.37		Deamidation (NQ)	0	0	0	0	0	0	0	0	0	0	0	0	0	0	0	0	1910	0	0	0	0	0	0	0	0	0	0	0	0	0	0	0	0	0	0
GRDSGYG	356.152	0.04	60	4.8	5.84			0	0	0	0	0	0	0	0	0	1120	798	0	0	0	0	0	0	0	0	0	0	0	0	0	0	0	0	0	0	0	0	271	0	0	863
AEDVRGNL	437.223	0.01	60	0	4.37			0	0	0	0	0	0	0	0	0	1920	0	0	0	0	0	0	0	0	0	0	0	0	0	0	0	0	0	0	0	0	0	0	0	0	0
QKLPHLK	432.28	0.03	60	8	10			0	675	0	0	107	0	0	0	0	0	786	0	0	0	0	0	362	0	0	136	0	671	234	380	0	0	87.9	0	0	0	189	100	0	216	0
PGMESRHRSPSGAGEGASCSDGP	743.648	0.05	60	3.9	5.45			0	0	0	0	0	0	0	0	0	1930	0	0	0	0	0	0	0	0	0	0	1220	0	18300	0	0	0	0	0	0	0	0	0	0	0	0
KVVGLAMGT	438.25	0.01	60	0	8.75			0	0	0	0	0	0	0	0	0	0	0	0	0	1940	0	0	0	0	0	0	0	0	0	0	0	0	0	0	0	0	0	0	0	0	0
GDSTFESKSYKM	460.541	0.05	60	2.6	6.07	sp|P02671|FIBA_HUMAN		0	0	0	0	0	0	0	0	0	1950	0	0	0	0	0	0	0	0	0	0	0	0	0	0	0	0	0	0	0	0	0	0	0	0	0
STASSPAPEEN(+.98)APSEGQRVWGQ(+.98)GQSPRPEN	788.855	0.03	60	10.3	4.49		Deamidation (NQ)	0	0	0	0	0	0	0	0	1950	0	0	0	0	0	0	0	0	0	0	0	0	0	0	0	0	0	0	0	0	0	0	0	0	0	0
SLDRN(+.98)LPSDSQDLGQHGLEED	1163.53	0.01	60	0	3.96		Deamidation (NQ)	0	0	0	0	1950	0	0	0	0	0	0	0	0	0	0	0	0	0	0	0	0	0	0	0	0	0	0	0	0	0	0	0	0	0	0
GMPGSKGKRGTLGFPGRAGRPGLP	784.443	0.02	60	4.8	12.31			0	0	0	0	0	0	0	0	0	0	0	0	0	0	0	0	0	1950	0	12300	0	0	6080	0	0	0	0	0	0	0	0	0	3500	19800	0
TSLELRKIGVRLNSLLGRKGS	1149.2	0.01	5.32	8	11.72			0	0	0	2.57	0	437	0	259	0	574	0	0	683	0	0	0	0	0	0	0	0	2880	0	6830	0	0	0	2400	800	0	0	265	0	4550	0
FVARN	606.345	0.03	60	8	9.75			0	0	0	0	0	0	0	0	0	1960	0	0	0	0	0	0	0	0	0	0	3580	0	0	0	0	0	0	0	0	0	3350	0	0	0	0
AEGAAGGSGGGPGGAEGGGV	736.309	0.05	60	5.9	3.8			0	0	0	0	0	0	0	0	0	0	0	0	0	0	0	0	1960	0	2000	1690	0	0	0	0	0	0	0	0	0	0	0	0	3470	0	0
L(+42.01)TTALRV	815.505	0.02	60	7.1	9.75		Acetylation (Protein N-term)	0	0	0	0	0	0	0	679	0	394	0	162	0	477	258	0	0	0	0	0	0	0	0	459	0	0	0	96.1	0	0	97.3	0	0	335	0
DTVCL	550.253	0.01	60	7.2	3.8	sp|P98194|AT2C1_HUMAN		0	0	0	0	0	0	1980	0	0	0	0	0	0	0	0	0	0	0	0	0	0	0	0	0	0	0	4050	0	0	1910	0	0	0	0	0
GPRAQ(+.98)TLN(+.98)P	478.249	0.06	60	5.3	9.75		Deamidation (NQ)	0	0	0	0	0	0	0	0	0	0	0	0	1380	0	0	608	0	0	3120	0	0	662	0	0	0	0	0	249	0	1100	0	0	0	0	0
KDTNTAFPKKVASLIIDGVSSFPLDT	691.878	0.01	60	15.5	6.04			0	0	0	1800	0	0	0	0	0	0	0	189	0	0	0	0	0	0	0	0	0	0	0	0	0	0	0	0	0	0	0	0	0	0	0
L(+42.01)AVGPAM	700.355	0.01	60	14.9	5.52		Acetylation (Protein N-term)	0	0	0	0	0	0	0	0	0	0	0	0	0	0	1990	0	0	0	0	0	0	0	0	0	0	0	6710	0	0	0	0	0	0	0	0
KISGLIVNIST	1144.69	0.07	4.31	8.8	8.75			0	0	0	267	267	582	96	0	0	135	0	0	0	0	615	28.8	0	0	0	0	550	296	1140	1620	278	0	0	2.62	349	569	526	110	0	0	235
HGVGGV	525.266	0.13	60	2.3	6.74			0	1060	937	0	0	0	0	0	0	0	0	0	0	0	0	0	0	0	0	0	0	0	0	0	0	0	0	0	0	0	0	0	0	0	0
AHKDAIVLAVKSLPPQTLINLAVFGTLVQ(+.98)	765.219	0.01	60	5.2	8.64		Deamidation (NQ)	0	0	0	0	0	0	96.1	0	0	0	0	0	1440	0	0	126	0	345	2570	0	0	0	0	0	0	0	0	0	0	0	0	0	0	0	0
REYHTEKLVTSKGDKELRTGKEKVTSGSTTTT	714.377	0.01	60	0	9.31	sp|P02671|FIBA_HUMAN		0	0	0	0	0	0	0	0	0	0	0	0	0	2010	0	0	0	0	0	0	0	0	0	0	0	0	0	0	0	0	0	0	0	0	0
STPHVAEPAENEQDEQDENGAEASADLR	1003.76	0.02	60	8.9	3.84			0	0	0	0	0	0	0	1780	0	0	0	0	0	0	0	245	0	0	0	0	0	0	0	0	970	0	0	0	0	0	0	926	1400	2940	3920
Q(-17.03)LRKEEENASVIDSA	557.958	0.01	60	0	4.41		Pyro-glu from Q	0	0	0	0	0	0	0	0	0	0	0	2030	0	0	0	0	0	0	0	0	0	0	0	0	0	0	0	0	0	0	0	0	0	0	0
NRVGKVEHGSVALPAIM(+15.99)	449.249	0.01	60	0	8.75		Oxidation (M)	0	0	0	0	0	0	0	0	0	0	2030	0	0	0	0	0	0	0	0	0	0	0	0	0	0	0	0	0	0	0	0	0	0	0	0
EQSVVYVPGISAEGNV	824.421	0.01	60	8.6	3.8			0	0	0	0	0	0	0	0	0	0	881	0	1150	0	0	0	0	0	0	0	0	0	0	0	0	0	0	0	0	0	0	0	0	0	0
GVKFRTRQ	496.298	0.03	60	7.2	12.01			0	0	0	0	0	0	0	875	0	0	0	0	0	1160	0	0	0	0	0	0	0	0	926	0	0	0	0	0	967	1790	0	0	0	2660	0
KQAVR	601.378	0.01	60	2.6	11			0	0	0	237	0	0	0	0	0	0	0	0	0	0	0	0	1800	0	0	0	0	0	0	0	0	1050	0	0	0	0	0	0	0	880	0
LHGSL	526.303	0.04	60	5.3	6.74			0	0	0	0	0	0	0	2040	0	0	0	0	0	0	0	0	0	0	0	0	0	0	0	0	0	0	0	0	0	0	0	0	0	0	0
CSCLDRVIQ	518.756	0.02	60	9.3	5.82			0	0	0	0	0	0	0	0	0	2040	0	0	0	0	0	0	0	0	0	0	0	0	0	11100	0	0	0	0	0	0	0	0	0	5250	3990
E(-18.01)GGGGG	415.157	0.01	60	0	4		Pyro-glu from E	0	0	0	2050	0	0	0	0	0	0	0	0	0	0	0	0	0	0	0	0	0	0	0	0	0	0	0	0	0	0	0	0	0	0	0
DSSPDSAED	461.663	0.05	60	3.5	3.37			0	0	0	0	0	0	0	0	0	2060	0	0	0	0	0	0	0	0	0	0	0	0	0	0	0	0	0	0	0	0	0	0	0	0	0
EMVVAGKLQDR	415.893	0.01	60	0	6.17			0	0	0	0	0	0	2060	0	0	0	0	0	0	0	0	0	0	0	0	0	0	0	0	0	0	0	0	0	0	0	0	0	0	0	0
FLKKSVVA	446.293	0.03	60	5.6	10			0	0	0	0	0	0	0	0	0	0	0	0	0	0	2070	0	0	0	0	247	503	0	0	504	0	904	443	0	609	0	0	0	627	0	0
CIIRN(+.98)SLLGL	551.808	0.02	60	14.5	8.25		Deamidation (NQ)	0	0	0	0	0	0	0	0	0	135	0	0	0	0	0	0	1940	0	0	0	0	0	0	0	0	0	0	0	0	0	0	0	0	0	0
VLGYKIVY	954.576	0.01	60	7.3	8.47			0	0	0	0	0	0	1530	0	0	550	0	0	0	0	0	0	0	0	0	0	0	103	0	0	0	0	0	0	0	0	0	0	0	0	0
S(+42.01)GGCGSGCGGCGSGCGGCGSGCGGY	663.517	0.01	60	6.9	5.23		Acetylation (Protein N-term)	1090	0	0	0	0	0	0	0	442	0	0	555	0	0	0	0	0	0	0	292	0	0	0	0	0	0	0	0	0	0	0	0	0	0	0
PRVGG	485.292	0.01	60	6.5	10.18			0	0	0	0	0	0	0	859	0	0	0	0	0	0	1230	0	0	0	0	0	0	0	0	0	0	0	0	0	0	0	0	0	0	0	0
ADEAGSEADHEGTHSTKRGHAKSRPV	546.863	0.06	60	2.5	6.29	sp|P02671|FIBA_HUMAN		0	0	0	0	597	0	0	0	0	0	0	0	0	521	353	0	0	628	0	235	984	0	0	1230	0	0	0	0	0	0	0	0	480	0	0
Q(+.98)TDPPDIDINATVALDFECPMT	803.008	0.01	60	6.5	3.28		Deamidation (NQ)	0	0	0	0	0	0	0	0	0	0	0	0	0	2100	0	0	0	0	0	0	0	0	0	0	0	0	2480	0	0	0	0	0	0	2970	0
VLAMALVLALAVLGSLSP	869.539	0.02	3.58	6.5	5.49			0	0	0	0	0	382	0	0	0	267	0	0	789	0	0	0	405	263	0	0	89.7	127	0	697	0	0	0	0	0	0	0	0	184	0	0
RALGALAAALRERGGRLGAAAPRVLKTVKGGSSGRG	876.022	0.01	60	15.6	12.3			1560	0	0	0	0	0	0	0	0	0	0	0	0	0	0	546	0	0	0	0	1360	6680	1500	0	1110	777	0	2200	0	0	0	0	0	0	0
AAPGQEPPEHMAELQRNEQEQPLG	886.087	0.01	60	8.2	4.32			0	0	0	0	0	0	0	0	0	0	0	0	0	0	0	0	2110	0	0	0	0	0	0	0	0	0	0	0	0	0	0	0	0	0	0
RKSHLIFPQPNYADTLISQES	1222.64	0.01	60	0	6.75			0	0	0	0	0	0	0	0	0	0	0	0	0	0	0	0	2120	0	0	0	0	0	0	0	0	0	0	0	0	0	0	0	0	0	0
DVATRVAMVRFFNSAN(+.98)VLQGFQ(+.98)M(+15.99)	873.757	0.01	60	0	9.6		Deamidation (NQ); Oxidation (M)	0	0	0	0	0	0	0	0	0	0	0	0	0	0	0	0	0	2120	0	0	0	0	0	0	0	0	0	0	0	0	0	0	0	0	0
SSCGQHGATSGQSSSHGQHGSGSSQ(+.98)SSRYGQ(+.98)QG	1070.11	0.03	60	7	8.01		Deamidation (NQ)	0	0	0	0	0	1970	0	0	0	0	0	156	0	0	0	0	0	0	0	0	0	318	2400	0	0	0	0	0	0	0	0	0	0	3760	0
TPENLRLKQQSELQ	561.969	0.05	60	6	5.81			0	0	0	0	0	0	0	0	0	0	0	0	2130	0	0	0	0	0	0	0	2530	0	2740	0	0	0	0	0	0	1760	0	0	0	5900	0
YTCRAENR	506.733	0.03	60	2.5	8.22			0	0	0	0	0	0	0	0	0	0	0	0	872	0	0	0	0	1260	0	0	0	0	0	0	0	0	0	0	0	0	0	0	0	0	0
TIQTVPTGAKPAILTATRPITKM(+15.99)IVTQ(+.98)PKG	1050.62	0.01	60	0	11.26		Oxidation (M); Deamidation (NQ)	0	0	0	0	0	0	0	0	0	0	0	2140	0	0	0	0	0	0	0	0	0	0	0	0	0	0	0	0	0	0	0	0	0	0	0
GLPGPPDVPDHAAY	703.343	0.01	60	9.3	4.2			0	0	0	0	0	0	0	0	0	0	0	0	0	0	2140	0	0	0	0	0	1460	0	0	7250	0	0	0	0	0	0	0	0	0	0	0
E(-18.01)SN(+.98)GGGGG	617.208	0.16	60	7	4		Pyro-glu from E; Deamidation (NQ)	0	0	0	0	0	0	0	0	0	0	998	1150	0	0	0	0	0	0	0	0	0	0	0	0	1580	0	0	1180	2370	3810	1680	0	0	3080	5130
KKITELSKEVFN(+.98)LKEALKEQPAAL	910.197	0.01	60	7.2	8.38		Deamidation (NQ)	0	0	0	0	0	2160	0	0	0	0	0	0	0	0	0	0	0	0	0	0	0	0	0	0	1510	0	2720	0	0	0	1850	2780	0	0	0
E(-18.01)RKKKST	858.518	0.01	60	8.8	10.29		Pyro-glu from E	0	0	0	0	0	0	0	0	0	1200	0	427	538	0	0	0	0	0	0	0	0	0	0	0	0	0	0	0	0	405	0	0	0	0	0
DEGGDENAPGS	1047.39	0.01	60	1.2	3.43			0	0	0	1150	0	0	0	0	1020	0	0	0	0	0	0	0	0	0	0	0	0	0	0	0	0	0	0	0	0	0	0	0	0	0	0
AGQDGGGGGGADEDDDGEDGDEGEEEEEACPEP	1065.36	0.02	60	7.2	2.95			0	0	0	1080	1090	0	0	0	0	0	0	0	0	0	0	0	0	0	1340	0	0	0	0	0	0	0	0	0	0	0	797	0	2200	0	0
EGEGPQN(+.98)PE	479.181	0.03	60	2.8	3.67		Deamidation (NQ)	0	0	0	0	0	0	0	0	0	0	1520	0	0	0	659	0	0	0	0	0	0	0	1150	0	0	0	0	0	0	0	0	0	0	0	0
LMYVYEDSAAESGIGGGGGGGG	501.717	0.07	60	5	3.57			0	0	0	0	0	0	0	0	0	0	2180	0	0	0	0	0	0	0	0	0	0	0	0	0	0	0	0	0	0	0	0	0	0	0	0
VGFYESDVMGRGHA	508.9	0.01	60	0	5.32			0	0	0	0	0	0	0	0	0	2180	0	0	0	0	0	0	0	0	0	0	0	0	0	0	0	0	0	0	0	0	0	0	0	0	0
FGFLPAMIGG	505.262	0.02	60	1.9	5.52			0	0	0	0	0	0	0	0	0	0	0	0	0	2180	0	0	0	0	0	0	0	0	0	632	0	0	0	0	0	0	0	0	0	0	0
ESHKKFNIKIKPLQ(+.98)SKDILKNAATVDELK	1112.98	0.02	60	7.2	9.61		Deamidation (NQ)	0	0	0	0	0	2180	0	0	0	0	0	0	0	0	0	0	0	0	7090	0	2900	6100	0	0	0	2530	0	0	0	0	3360	0	1960	0	0
QLQKVPPEWK	418.238	0.03	60	3.6	8.59	sp|P02671|FIBA_HUMAN		0	0	0	0	0	0	0	0	0	2200	0	0	0	0	0	0	0	0	0	0	0	0	0	0	0	0	0	0	0	0	0	0	0	0	0
Q(+.98)GSEEYETTRGQI	500.229	0.01	60	5.9	4.25		Deamidation (NQ)	0	2200	0	0	0	0	0	0	0	0	0	0	0	0	0	0	0	0	0	0	0	0	0	0	0	0	0	0	0	0	896	0	0	0	0
HPVSVVKLH	1015.61	0.15	3.24	9.6	8.76			225	0	269	0	0	111	322	47.1	0	153	0	31.1	353	0	46.4	202	445	0	342	556	410	0	531	250	297	216	273	71.5	358	265	184	76.5	0	0	103
GGSTSYGTGSETESPRNPSSAGSWNSGSSGPGSTG	1083.13	0.01	60	0	4.53	sp|P02671|FIBA_HUMAN		0	0	0	0	0	0	0	0	0	2210	0	0	0	0	0	0	0	0	0	0	0	0	0	0	0	0	0	0	0	0	0	0	0	0	0
LVMDDEIESEAKKES	574.941	0.01	60	0.6	4.08			0	0	0	0	0	0	0	2210	0	0	0	0	0	0	0	0	0	0	0	0	0	0	0	0	0	0	0	0	0	0	0	1690	0	0	0
MDGQT	551.215	0.02	60	1.6	3.8	sp|P22105|TENX_HUMAN		0	0	0	0	0	0	0	0	0	0	0	0	0	2210	0	0	0	0	0	0	0	0	0	0	0	0	0	0	0	0	0	0	0	2530	0
LKDKM(+15.99)EKLKRLLQ(+.98)VAARKSQ(+.98)V	834.164	0.02	5.25	10.1	10.56		Oxidation (M); Deamidation (NQ)	647	248	0	0	210	0	0	676	0	0	363	0	0	0	0	67.5	0	0	0	1990	0	737	4280	0	0	0	0	0	234	0	421	364	0	0	0
PRGQKKK	421.277	0.01	60	6.5	11.27			0	0	0	0	0	0	0	0	0	0	0	0	782	1430	0	0	0	0	0	0	0	0	0	2160	0	0	0	482	0	0	0	0	0	0	0
LQPLPKSAT	954.56	0.06	60	8.3	8.75			0	0	0	0	0	0	898	0	0	1190	0	0	0	124	0	0	0	0	1900	269	728	223	763	0	0	0	0	76.5	548	529	0	0	0	0	490
SRSESCHTDGTYAYDADFSCCSSFN(+.98)G	937.665	0.01	60	10.2	4.22		Deamidation (NQ)	0	0	0	0	436	0	646	0	0	0	0	1140	0	0	0	0	0	0	0	0	0	0	0	1210	0	389	0	0	0	0	0	0	0	0	1260
E(-18.01)GKPKKTHI	1019.6	0.08	5.99	10.9	9.71		Pyro-glu from E	359	0	223	345	648	0	0	0	0	457	0	0	0	0	18.8	0	178	0	0	232	980	0	228	291	0	0	357	0	569	0	7730	190	496	651	0
TLDPERLGR	352.865	0.07	60	1.7	5.74	sp|P01024|CO3_HUMAN		0	0	0	0	0	0	0	0	0	2230	0	0	0	0	0	0	0	0	0	0	0	0	0	0	0	0	0	0	0	0	0	0	0	0	0
KGNPGVGTQ(+.98)GPRGPPGPA	548.968	0.01	60	0	11		Deamidation (NQ)	0	0	0	0	0	0	0	0	0	0	0	0	2230	0	0	0	0	0	0	0	0	0	0	0	0	0	0	0	0	0	0	0	0	0	0
LLPEN	585.321	0.03	60	11	4			0	0	0	0	0	0	0	0	0	0	0	1070	0	1160	0	0	0	0	0	0	0	0	0	0	0	788	0	0	0	1830	0	0	2230	0	0
Q(-17.03)GGRPHRPPQGQPP	497.924	0.01	60	0	12		Pyro-glu from Q	0	0	0	0	0	0	0	0	2240	0	0	0	0	0	0	0	0	0	0	0	0	0	0	0	0	0	0	0	0	0	0	0	0	0	0
E(-18.01)GDGDSSH	785.251	0.01	60	5.8	4.02		Pyro-glu from E	0	0	0	0	0	2240	0	0	0	0	0	0	0	0	0	0	0	0	0	1280	0	0	0	0	0	0	0	0	0	0	0	0	0	0	0
FAVTF	584.299	0.01	60	17.9	5.52			0	1760	0	0	0	0	0	0	0	0	0	0	484	0	0	0	0	0	0	0	0	0	0	0	0	0	0	0	0	0	0	0	0	0	0
SSNTQEEAQPSS	632.769	0.01	60	0	3.79			0	0	0	0	0	0	0	0	0	0	2250	0	0	0	0	0	0	0	0	0	0	0	0	0	0	0	0	0	0	0	0	0	0	0	0
KGHPGPPGLPGNGLPGLPGPRGLPGDKGKDGLPGQQGLPGSKG	1004.8	0.01	60	1.6	10			0	0	0	0	0	0	0	0	0	0	2250	0	0	0	0	0	0	0	0	0	0	0	0	0	0	0	0	0	0	0	0	1650	0	0	0
SCTDN(+.98)Q(+.98)DGTCS	566.675	0.02	60	0.9	3.56		Deamidation (NQ)	0	0	0	0	0	2250	0	0	0	0	0	0	0	0	0	0	0	0	0	0	0	0	0	0	1790	0	0	0	0	0	0	0	0	0	0
KSIFPYSVSLPQSCSIL	623.667	0.03	60	4.8	8.2			0	0	0	0	0	0	0	0	0	0	0	0	0	0	0	0	0	2250	0	0	2820	0	0	0	1090	0	0	0	0	0	2290	0	2150	3720	0
PPKKV	568.385	0.02	60	7.7	10.02			0	0	512	0	0	0	0	0	0	0	0	0	0	1740	0	0	0	0	0	0	0	0	0	0	0	0	0	0	0	0	0	0	0	0	0
PILGALIADS	969.574	0.02	60	11.5	3.8			0	0	0	0	0	0	0	0	0	566	0	0	1690	0	0	0	0	0	1850	290	197	0	0	0	0	179	0	0	0	686	0	0	0	0	0
GGRGR	502.287	0.01	60	0	12			0	2260	0	0	0	0	0	0	0	0	0	0	0	0	0	0	0	0	0	0	0	0	0	0	0	0	0	0	0	0	0	0	0	0	0
D(+42.01)GDSSCGDVCFM(+15.99)	647.204	0.01	60	7.2	3.42		Acetylation (Protein N-term); Oxidation (M)	602	0	1200	466	0	0	0	0	0	0	0	0	0	0	0	0	0	0	0	0	187	0	0	0	0	0	0	0	0	0	0	0	1270	0	0
EAPPPA	581.288	0.02	60	12.1	4			0	0	0	0	0	0	0	0	0	0	0	0	0	0	2270	0	0	0	0	0	486	0	0	6100	0	0	0	0	0	0	0	0	0	0	0
PSGLVGPQ(+.98)GSPGLPGQV	516.619	0.01	60	0	5.96		Deamidation (NQ)	0	0	0	0	0	0	0	0	0	0	0	0	0	0	0	0	0	2280	0	0	0	0	0	0	0	0	0	0	0	0	0	0	0	0	0
SGPPGLPGNPGPAGQKGETVVGPQGPPGAPGLPGPPGFGRPGDPGP	826.81	0.22	60	4.8	5.79			0	2280	0	0	0	0	0	0	0	0	0	0	0	0	0	0	0	0	0	0	0	0	12000	0	0	0	0	0	0	0	0	0	927	7720	4570
RAGVIKVW	928.559	0.04	5.68	10.2	11			0	0	0	573	151	737	0	0	0	676	0	138	0	0	0	0	0	5.75	0	0	1050	0	0	0	33.1	0	198	0	0	0	0	553	0	0	94.7
CPNPGCGNQ	445.167	0.03	60	2	5.51	sp|Q01844|EWS_HUMAN		0	0	618	0	0	0	0	1670	0	0	0	0	0	0	0	0	0	0	0	0	0	0	0	0	0	0	0	0	0	0	0	0	0	0	1020
ADVSPLRATSP	557.303	0.01	60	0	5.88			2290	0	0	0	0	0	0	0	0	0	0	0	0	0	0	0	0	0	0	0	0	0	0	0	0	0	0	0	0	0	0	0	0	0	0
DN(+.98)DDCVAHKCRHGAQCVDTINGYTCTCPQ	792.834	0.01	60	8.1	5.2		Deamidation (NQ)	0	0	0	0	0	0	0	0	0	0	0	0	0	0	0	2290	0	0	0	0	0	367	0	0	0	0	0	0	0	0	0	0	0	1130	0
LGLLPALGW	939.576	0.04	3.83	11	5.52			0	978	0	0	0	336	0	0	0	79	0	85.2	334	134	0	0	346	0	0	0	0	300	443	588	400	451	0	206	0	0	0	277	102	0	0
AGRSSSPAGET	510.243	0.02	60	1.6	6.05			0	0	0	0	0	0	0	0	0	2300	0	0	0	0	0	0	0	0	0	0	0	0	0	0	0	0	0	0	0	0	0	0	445	0	0
RRVIVQ(+.98)PGKT	1154.71	0.05	60	7	12.01		Deamidation (NQ)	0	0	848	0	229	0	249	0	0	0	0	0	0	0	858	0	120	0	169	334	421	0	53.9	0	197	0	192	104	485	0	397	122	179	0	560
Q(-17.03)ERYEIEETETVT	805.36	0.03	60	5	3.98		Pyro-glu from Q	0	0	0	0	0	0	916	0	0	0	0	0	1390	0	0	0	0	0	0	0	0	0	0	0	0	3700	2400	2780	2330	4670	0	0	0	0	0
ATLVVLALAM(+15.99)VPILLLGTPLHLLHRHRRRL	853.026	0.01	60	7.5	12.48		Oxidation (M)	0	0	0	0	0	1340	0	0	0	0	0	0	0	0	234	733	0	0	0	0	0	0	0	298	9230	0	0	0	0	4370	0	0	0	0	0
QQLQ(+.98)ALNLLVILLPDANRDTLKALLE	972.91	0.01	60	13.2	4.56		Deamidation (NQ)	0	438	0	1630	0	0	0	0	0	0	0	0	0	246	0	0	0	0	7060	0	0	1110	11900	233	585	0	6630	475	0	0	2910	0	599	0	3700
EGHSEESDTQ(+.98)SVSGHGQDGPHQQ(+.98)SHQ(+.98)	697.783	0.01	60	9.3	4.81		Deamidation (NQ)	0	0	0	0	0	0	0	2340	0	0	0	0	0	0	0	0	0	0	0	0	0	0	0	0	0	0	0	0	0	0	0	0	0	8390	2900
HSTSVSMSRLSLPSKNGSKKKGLKPKELFKKAERKGKESSALG	929.136	0.01	60	7.8	10.58			0	0	2360	0	0	0	0	0	0	0	0	0	0	0	0	0	0	0	3730	0	0	0	0	0	0	0	0	0	0	0	0	0	0	0	0
QQKQ(+.98)Q(+.98)QEQ(+.98)QQ	652.276	0.01	60	7.9	6		Deamidation (NQ)	0	0	0	0	0	0	0	0	0	0	0	504	0	1860	0	0	0	0	0	0	3780	0	10600	0	0	582	0	0	0	0	0	0	0	0	0
VCGVEPPGPGDTVVQ(+.98)GDLQETTVVTGLGP	706.345	0.12	60	4.3	3.43		Deamidation (NQ)	0	0	1040	0	0	0	0	0	0	0	0	0	0	0	0	1330	0	0	0	621	0	0	0	0	0	0	0	0	0	0	0	0	476	0	0
FGPVVAPKPK	520.328	0.02	60	10.7	10	sp|Q15942|ZYX_HUMAN		0	1090	0	0	0	0	0	1280	0	0	0	0	0	0	0	0	0	0	0	0	0	0	0	10700	0	0	0	1330	2700	0	0	0	0	0	0
KTLGFILS	878.53	0.02	60	10.8	8.75			0	0	643	562	961	0	0	205	0	0	0	0	0	0	0	0	0	0	805	0	0	0	2940	514	0	0	0	0	0	0	0	0	2350	0	0
QAPPGRQPSRGGSQ(+.98)AGP	824.919	0.02	60	5.3	12		Deamidation (NQ)	0	0	0	0	0	0	0	0	0	0	0	0	0	0	2380	0	0	0	0	0	0	0	0	0	0	3250	0	0	0	0	0	0	0	2930	0
GTFSA	482.226	0.12	60	2.4	5.52			0	0	0	0	0	1130	0	338	665	0	0	253	0	0	0	0	0	0	0	0	0	0	0	0	0	0	0	0	0	0	0	0	0	0	0
CCDASPCQ(+.98)QSSCQ(+.98)ESVCMSGSCQA	1222.41	0.01	60	0	3.67		Deamidation (NQ)	0	0	0	0	0	0	0	0	0	0	0	0	2390	0	0	0	0	0	0	0	0	0	0	0	0	0	0	0	0	0	0	0	0	0	0
RETQ(+.98)SREILQ(+.98)SDGTVVN(+.98)	645.651	0.01	60	0	4.68		Deamidation (NQ)	0	0	0	0	0	0	2390	0	0	0	0	0	0	0	0	0	0	0	0	0	0	0	0	0	0	0	0	0	0	0	0	0	0	0	0
TKPGGLFG	776.462	0.01	5.3	9	8.41			0	0	0	0	232	0	0	0	318	0	0	0	0	0	0	1840	0	0	0	0	6590	0	0	0	0	0	0	0	0	0	0	0	0	1740	0
KEKESQDKTLSLPELEQQQEQQQEQQQEQV	910.946	0.01	60	0	4.22			0	0	0	0	2410	0	0	0	0	0	0	0	0	0	0	0	0	0	0	0	0	0	0	0	0	0	0	0	0	0	0	0	0	0	0
HVEAFKTGPEMQNILKKVAATLQVPVN(+.98)DLNA	1126.26	0.01	60	1.5	6.76		Deamidation (NQ)	0	0	0	0	0	0	0	0	0	0	0	0	0	0	0	2410	0	0	0	0	0	0	0	0	0	0	2690	0	0	0	0	0	0	0	0
EEGEFSEAREDMAALE	906.881	0.01	60	2.9	3.77	sp|P68366|TBA4A_HUMAN		0	0	0	0	0	0	2420	0	0	0	0	0	0	0	0	0	0	0	0	0	0	0	0	0	0	0	4940	0	0	0	0	0	0	0	0
LVLQ(+.98)SLPGK	955.571	0.01	60	3.9	8.75		Deamidation (NQ)	0	0	0	0	0	0	0	0	0	0	0	0	0	0	2420	0	0	0	0	0	0	0	0	0	0	0	838	0	0	0	2850	0	1540	0	0
WQ(+.98)SPPLSRGLEYN(+.98)EVN(+.98)VT	697.998	0.02	60	1.8	4.53		Deamidation (NQ)	0	0	0	0	0	0	2430	0	0	0	0	0	0	0	0	0	0	0	0	0	0	0	0	0	0	2500	5710	0	0	0	0	0	0	0	0
RRVRHLVS	1022.62	0.07	5.52	10.3	12.3			0	95.4	0	0	31	0	0	308	459	168	0	137	0	0	219	0	694	322	227	65.1	19.8	0	1300	550	65.9	217	99.2	0	0	544	0	225	613	397	0
AIMTTKLVT	489.295	0.01	60	4	8.8			0	0	0	0	0	0	0	0	0	2440	0	0	0	0	0	0	0	0	0	0	0	0	0	0	0	0	0	0	0	0	0	0	0	0	0
Q(-17.03)DADDMCMICF	637.697	0.01	60	8.2	3.42		Pyro-glu from Q	0	2440	0	0	0	0	0	0	0	0	0	0	0	0	0	0	0	0	0	0	0	0	0	0	0	0	0	0	0	1440	0	0	0	0	0
CGKAFCDG	800.308	0.01	60	8.4	5.82			0	0	0	0	0	0	0	0	0	390	0	0	0	0	566	725	759	0	0	0	0	0	956	0	0	0	888	433	0	0	0	535	0	0	0
YEGSYALTSEEAERSDGDPVQPAVLQVHQ	1059.16	0.04	60	10	4.08			0	0	0	0	2440	0	0	0	0	0	0	0	0	0	0	0	0	0	0	0	0	0	0	0	0	0	3670	0	0	4490	0	0	0	0	0
RSKPKLVST	1015.63	0.08	2.48	7.9	11.17			61.9	0	238	0	0	0	528	311	0	109	0	227	440	0	0	71.4	455	0	1040	123	114	0	114	0	415	89.7	483	0	0	0	116	478	0	238	0
FAAGTLQAAAT	511.275	0.01	60	0	5.52			0	0	0	0	0	0	0	0	0	0	0	0	0	2460	0	0	0	0	0	0	0	0	0	0	0	0	0	0	0	0	0	0	0	0	0
KFSPGAPGGSGSQPNQKLGHPEALSAGTGSPQPPSFTYAQQ	1017.25	0.02	60	7.2	8.51	sp|Q15942|ZYX_HUMAN		0	0	0	0	0	0	0	0	0	0	0	0	0	0	2460	0	0	0	0	0	0	0	0	0	0	1550	0	0	0	0	0	0	0	0	0
QPSLPGT	699.39	0.01	60	14.8	5.52			0	0	0	0	0	0	0	0	0	0	0	0	0	0	2460	0	0	0	0	0	7810	0	0	0	0	2590	0	0	0	0	0	0	0	0	0
GPQ(+.98)GSGGN(+.98)HEQYSLE	781.315	0.01	60	0	4.51		Deamidation (NQ)	0	0	0	0	0	0	0	0	2470	0	0	0	0	0	0	0	0	0	0	0	0	0	0	0	0	0	0	0	0	0	0	0	0	0	0
RLPLPVFT	942.568	0.09	1.75	9.4	9.75			370	0	0	0	349	0	366	130	156	140	0	0	0	267	420	272	0	0	0	257	360	2750	0	189	671	148	94	0	354	464	252	0	38.5	0	0
EQSGSSNGSESSPAN(+.98)ENGDRHLQQ(+.98)GSE	698.288	0.02	60	6.8	4.25		Deamidation (NQ)	0	2490	0	0	0	0	0	0	0	0	0	0	0	0	0	0	0	0	0	0	0	0	0	0	0	2420	0	0	0	0	0	0	0	0	0
SSVSPPQIISSTIKTHVSNKYGTDFICSSLLT	853.457	0.01	60	13.2	7.93			0	0	0	2490	0	0	0	0	0	0	0	0	0	0	0	0	0	0	2290	0	0	0	0	0	1220	0	0	0	0	0	0	0	0	0	0
CRLGAESPSIA	552.273	0.05	60	8.1	5.99			0	0	0	0	0	0	0	0	0	0	0	0	0	0	0	0	2500	0	0	0	0	0	0	0	0	0	0	0	0	0	0	0	0	9820	0
VGSKTKEGVVHGVATVAE	589.992	0.02	60	1.7	6.73			0	0	0	0	0	0	0	0	0	0	0	0	2520	0	0	0	0	0	0	0	0	0	0	0	0	0	0	0	0	0	523	0	0	0	0
KKVVI	586.414	0.01	60	10	10			0	0	0	0	0	0	0	0	0	0	1040	0	123	869	0	488	0	0	0	0	0	0	0	553	0	0	0	0	0	0	311	0	0	0	0
GAPFCPECYFERFSPRCGF	738.318	0.03	60	7.8	6.12			0	0	0	0	0	0	0	0	0	0	0	0	0	0	0	0	2520	0	0	0	6720	0	5260	5160	0	0	0	0	0	0	0	0	0	5560	0
RIIGLD	686.42	0.03	60	8.6	5.84			1900	0	0	0	0	632	0	0	0	0	0	0	0	0	0	0	0	0	0	0	0	0	951	0	1370	495	0	0	0	0	0	0	384	0	723
E(-18.01)PPSNLIAMEVSSKYVKLNWN	1201.11	0.02	60	19.1	6.24		Pyro-glu from E	0	0	0	0	0	0	0	0	0	0	1840	0	0	0	0	0	706	0	0	0	0	0	0	0	0	0	0	0	0	0	0	0	0	0	0
GGMSSMNQ(+.98)M(+15.99)TGQISM(+15.99)T	847.334	0.03	60	7	5.52		Deamidation (NQ); Oxidation (M)	0	0	0	0	0	1050	0	0	0	0	0	0	1500	0	0	0	0	0	0	0	0	0	0	0	0	0	0	0	0	0	0	0	0	0	0
AGKLLRALALRPRFLAAGSQAVQ	803.159	0.03	5.38	7.6	12.3			0	0	0	820	97.4	0	0	0	0	0	936	62.1	0	0	0	0	0	642	0	0	26900	432	0	0	939	39.3	0	0	0	0	0	7290	4340	592	0
EQCGAIM(+15.99)HGN(+.98)AV	623.763	0.03	60	5.9	5.24		Oxidation (M); Deamidation (NQ)	0	0	0	0	0	0	0	0	0	0	1190	0	1380	0	0	0	0	0	0	0	0	0	0	0	0	0	0	0	0	0	0	0	0	0	0
Q(-17.03)GLLPVLESFK	607.343	0.01	60	0.7	6		Pyro-glu from Q	0	0	0	0	0	0	0	0	0	1060	0	0	0	0	0	0	1510	0	0	0	0	0	0	0	0	0	0	0	0	0	0	0	0	0	0
FLGLVAMVLVLQ	651.886	0.01	60	9.2	5.52			2570	0	0	0	0	0	0	0	0	0	0	0	0	0	0	0	0	0	0	0	0	0	0	5180	0	0	0	0	0	0	0	0	0	0	6480
SSCCQPSCCETSCCQPSCCQTSSCGTGCGIGGGIGYGQ	729.261	0.01	60	10.9	4			141	0	0	0	0	0	865	0	0	0	0	0	482	0	0	132	953	0	0	0	3710	0	0	0	0	0	0	0	66.8	0	1580	1630	1220	0	0
Q(-17.03)RGLVPVFV	997.598	0.08	5	9.3	9.75		Pyro-glu from Q	1020	0	1.92	118	145	137	0	0	0	168	0	0	420	70.6	0	0	83.1	418	1290	0	56.9	0	0	418	14.5	15.1	238	0	0	776	306	660	700	0	0
VGIVAGLAVLAVVVIGAVVAAVMCR	784.146	0.01	60	11	8.22			0	0	0	0	0	0	0	0	539	0	0	0	0	0	0	0	0	2050	875	0	0	231	0	0	0	0	354	0	3380	0	0	0	0	0	0
SASGYTKEMQ(+.98)ADDELLHPLGP	754.006	0.01	60	8.9	4.31		Deamidation (NQ)	0	0	0	0	0	0	0	0	0	0	0	0	0	0	0	0	0	2590	0	0	0	0	0	0	0	0	0	0	0	0	0	0	0	0	0
PPIVIKSTF	1001.6	0.06	5.74	8	9.18			0	0	26.2	0	0	0	106	217	1050	1150	0	0	0	0	0	49.7	0	0	843	134	108	1190	0	0	436	87.6	151	0	0	110	0	0	0	0	4480
LGAGIPGLGVGV	1009.62	0.03	4.86	9.5	5.52			0	0	0	0	494	0	0	0	0	162	0	0	393	1550	0	0	0	0	0	195	259	47.4	0	251	422	0	0	0	0	249	124	1490	318	215	0
DVDSDT	651.25	0.01	60	2.3	3.42			0	0	0	0	0	2600	0	0	0	0	0	0	0	0	0	0	0	0	0	0	0	90.4	0	0	8330	0	0	0	0	0	0	0	0	0	0
DITGGSEER	482.22	0.07	60	11.6	4.14			0	0	0	0	0	0	0	0	0	2610	0	0	0	0	0	0	0	0	0	0	0	0	0	0	0	0	0	0	0	0	0	0	0	0	0
ENQ(+.98)KTDVLCADEEEDCQAAS	1099.94	0.04	60	9	3.66		Deamidation (NQ)	0	0	0	0	0	0	0	0	0	0	2610	0	0	0	0	0	0	0	0	0	3160	0	9420	0	0	0	0	0	0	0	0	0	0	0	0
SLDRNLPSDSQDLGQHGLEEDFM(+15.99)	873.722	0.02	60	2.9	3.96		Oxidation (M)	0	0	0	0	0	0	2620	0	0	0	0	0	0	0	0	0	0	0	0	1650	0	0	0	0	0	3630	0	0	0	0	0	0	0	0	0
VASLVQ(+.98)PMEQ(+.98)GIRRDFMRN(+.98)FI	628.321	0.01	60	10	9.48		Deamidation (NQ)	0	2060	0	0	0	0	0	0	0	0	0	0	0	0	565	0	0	0	0	0	0	0	0	3290	0	1480	0	0	0	3570	0	0	0	57800	71400
TAGHL	498.267	0.05	60	4.5	6.4			0	0	0	0	0	0	0	0	0	792	0	1840	0	0	0	0	0	0	0	0	0	0	0	0	1030	0	0	734	0	3860	0	0	943	2590	4590
HCSSSDS	722.24	0.03	60	6.9	5.08			0	960	0	49.3	0	233	0	0	92.1	0	296	0	31.4	0	0	772	0	214	404	0	0	0	0	0	0	0	0	12.7	0	10.3	0	5.93	85.4	0	0
KGLVKPPLK	490.336	0.03	60	7.5	10.3			0	0	0	0	0	529	805	0	238	0	0	0	0	0	582	494	0	0	0	1820	331	0	0	0	0	1570	0	410	867	388	0	0	0	0	0
GASDGGGGV	676.283	0.03	60	6.5	3.8			0	0	0	0	0	0	2660	0	0	0	0	0	0	0	0	0	0	0	0	0	0	0	0	0	0	0	0	0	0	0	0	0	3970	0	0
F(+42.01)PVARYALR	1134.68	0.06	4	7	10.84		Acetylation (Protein N-term)	0	0	0	0	334	968	0	0	0	711	0	0	0	0	363	0	289	0	94.4	0	0	276	761	156	0	927	1380	1160	5950	2540	0	0	280	334	1020
EKVHAGLM	442.745	0.01	60	12.8	6.85			0	0	0	0	0	0	0	0	0	2670	0	0	0	0	0	0	0	0	0	0	0	0	0	0	0	0	0	0	0	0	0	0	0	0	0
SQ(+.98)IKIPSDTLSL	651.865	0.01	60	3.9	5.55		Deamidation (NQ)	2670	0	0	0	0	0	0	0	0	0	0	0	0	0	0	0	0	0	0	0	0	0	0	0	0	0	0	0	0	0	0	0	0	0	0
KVSAK	532.357	0.02	60	10.7	10			0	0	755	376	0	0	0	0	681	0	0	0	509	0	0	0	350	0	0	0	0	0	0	0	0	0	0	0	0	0	82.6	0	0	0	0
VPGGVVAVGRLD	1138.68	0.03	60	8.2	5.81			0	0	0	773	1260	643	0	0	0	0	0	0	0	0	0	0	0	0	824	1150	1750	0	863	580	42.2	139	4970	0	0	472	284	1550	828	650	0
ERAALM(+15.99)VFLLL	646.375	0.01	60	11.8	6.1		Oxidation (M)	0	0	0	0	0	0	0	0	0	0	2690	0	0	0	0	0	0	0	0	0	0	0	0	0	0	0	0	0	0	0	0	1800	0	0	0
RDQRAVAGPALRRWLLLGTVTVGFLAQSVLAG	848.768	0.01	60	0.8	12			0	0	0	0	0	2690	0	0	0	0	0	0	0	0	0	0	0	0	0	5280	0	0	0	0	22800	0	0	0	0	0	0	0	5060	0	0
VVKSGT	590.352	0.04	60	9.6	8.72			0	1130	0	675	0	0	0	0	0	0	0	886	0	0	0	0	0	0	0	0	0	0	0	0	0	0	0	0	0	0	0	0	0	0	0
LPPLRIP	403.273	0.03	60	9.7	9.75			0	0	0	0	879	0	0	0	0	0	0	0	0	0	0	1820	0	0	1110	3390	0	0	0	0	0	0	0	0	4090	2160	0	1570	0	0	0
VVVAGSLL	757.473	0.01	5.22	6.7	5.49			0	0	0	0	64.2	0	0	393	0	502	1290	0	0	278	0	0	172	0	0	0	0	587	0	0	0	0	0	0	0	210	0	0	0	0	0
PGSLAN(+.98)VVKSQKQVKSLPKKINALKKPTVNLTT	883.533	0.01	60	11.3	10.78		Deamidation (NQ)	0	0	0	0	0	0	0	0	0	0	0	2700	0	0	0	0	0	0	926	315	1510	0	0	0	0	0	0	0	0	1830	0	0	0	0	0
KVTLPLAK	435.308	0.03	60	8.3	10			0	0	0	0	1780	0	0	0	0	0	0	0	0	0	924	0	0	0	0	0	0	0	0	0	3850	0	3670	817	0	0	0	0	0	0	0
PPALPAALTT	951.572	0.08	2.88	9	5.96			0	0	0	0	340	179	0	1160	0	304	0	0	0	124	0	315	50.3	232	259	124	448	350	0	0	0	0	0	753	0	0	172	313	222	0	125
GLSEEM(+15.99)FQQQLAEKQLG	976.474	0.02	60	3.7	4.25		Oxidation (M)	0	0	0	0	0	0	2710	0	0	0	0	0	0	0	0	0	0	0	0	0	0	0	0	0	3070	0	0	0	0	0	0	0	0	0	0
SSSYSKQ(+.98)FTSSTSYN(+.98)RGDSTFESKSYKMADEAGSEADHEGTHST	958.203	0.01	60	11.3	5.01	sp|P02671|FIBA_HUMAN	Deamidation (NQ)	0	0	0	0	0	0	0	0	0	0	0	0	0	2720	0	0	0	0	0	0	0	0	0	0	0	2000	0	0	0	0	0	0	0	0	14100
EIQEAKAPSP	535.269	0.01	60	7.4	4.53			0	0	0	0	0	0	0	0	0	0	2730	0	0	0	0	0	0	0	0	0	0	0	0	0	0	0	0	0	0	0	0	0	0	0	0
CDNGGTWEQ(+.98)GQ(+.98)CACLPGFSGDRCQLQ(+.98)TR	1011.72	0.02	60	6.9	4.56		Deamidation (NQ)	0	0	0	0	0	1440	0	0	0	0	0	0	1290	0	0	0	0	0	652	0	0	1790	0	0	1730	0	0	0	0	0	0	0	1660	0	0
TEGTSGKVLEP	559.301	0.01	60	8.7	4.53			0	0	0	0	0	0	0	0	0	2740	0	0	0	0	0	0	0	0	0	0	0	0	0	0	0	0	0	0	0	0	0	0	0	0	0
TVGSLAGQPLQERAQAWGER	718.701	0.01	60	0	5.81			0	0	0	0	0	0	0	0	0	0	0	0	0	0	0	2740	0	0	0	0	0	0	0	0	0	0	0	0	0	0	0	0	0	0	0
RGLPPTSLQVPAAYPGIL	617.347	0.02	60	2.1	8.75			0	0	0	0	2750	0	0	0	0	0	0	0	0	0	0	0	0	0	0	0	0	0	0	0	0	0	0	0	0	0	0	0	0	0	0
NVIGACIVILLATPIAAIIIPPLGLIYFFVQ	817.251	0.01	5.2	10.1	5.52			18.1	0	0	0	0	0	0	1800	434	0	0	0	0	503	0	0	0	0	0	2240	0	0	0	0	0	0	0	583	61	0	0	0	0	0	0
ASEENLKAMA	532.263	0.02	60	2.6	4.53			0	0	0	0	0	0	0	0	0	2760	0	0	0	0	0	0	0	0	0	0	0	0	0	0	0	0	0	0	0	0	0	0	0	0	4100
LSPRKVIVKGGRIVAMQFVR	752.14	0.01	60	13.9	12.31			0	0	1290	0	0	0	722	355	0	0	403	0	0	0	0	0	0	0	0	0	0	0	0	0	0	0	0	0	0	0	0	0	0	0	0
YRNLVFLGIAVSKPDLI	959.586	0.05	3.87	8.7	8.59			187	0	0	0	94	1130	0	0	0	0	0	327	250	0	605	177	0	0	384	0	0	2190	358	855	0	0	262	122	0	0	282	2230	304	166	0
KREEAPSLRPAPPPISGGGY	520.529	0.01	60	1.9	8.59	sp|P02675|FIBB_HUMAN		0	0	0	0	0	0	0	0	0	2770	0	0	0	0	0	0	0	0	0	0	0	0	0	0	0	0	0	0	0	0	0	0	0	10100	0
ALVEGEIAEEAAEKA	765.38	0.01	60	11.9	3.98			0	0	0	0	0	0	0	0	0	0	0	1150	0	0	0	0	1620	0	0	0	0	0	0	0	0	0	5500	0	0	3770	0	6020	0	0	0
AAPGQEPPEHMAELQR	587.617	0.13	60	2.6	4.75			0	0	0	0	0	0	0	0	0	2780	0	0	0	0	0	0	0	0	0	0	0	0	0	0	0	0	0	0	0	0	0	0	0	0	0
HRHPDEAAFFDTASTGKTFP	558.766	0.02	60	3.8	6	sp|P02671|FIBA_HUMAN		0	0	0	0	0	0	0	0	0	0	0	2780	0	0	0	0	0	0	0	0	0	0	0	0	0	2740	3780	0	0	0	0	0	0	0	0
Q(-17.03)KDSYVGDEAQSKRGILT	659.998	0.03	60	5.6	6.12		Pyro-glu from Q	0	0	0	0	0	0	0	0	0	0	1490	0	0	0	0	0	0	1300	0	0	2490	0	2420	0	0	0	0	0	0	0	0	2010	0	0	3540
GIFPILFV	905.563	0.02	5.54	9.9	5.52			0	0	256	0	0	0	716	0	0	0	0	0	0	0	0	0	0	1830	0	0	0	0	0	0	0	0	147	0	304	0	0	11.2	210	0	0
STKKAP	631.38	0.02	60	5.2	10			0	0	0	0	0	0	0	0	0	2810	0	0	0	0	0	0	0	0	0	0	0	0	0	0	0	0	0	0	0	0	0	0	0	0	0
VGIIQAAEL	913.544	0.01	60	10.7	4			0	0	0	0	0	0	0	0	2420	391	0	0	0	0	0	0	0	0	0	0	0	0	0	431	0	0	0	0	1060	0	157	0	0	0	0
RCSGAAGAGPAES	567.257	0.02	60	2.4	5.99			0	0	0	0	506	0	0	2310	0	0	0	0	0	0	0	0	0	0	0	0	0	0	0	1880	0	0	0	0	0	0	0	0	0	0	0
SDASKKRLIEDTEDWRPR	551.287	0.01	60	5.4	5.97			0	0	0	0	0	0	0	0	0	0	709	0	2110	0	0	0	0	0	0	0	0	0	0	0	0	0	0	0	0	994	0	0	0	982	0
ESDGEGPP	787.305	0.01	60	0	3.57			0	0	0	0	0	0	0	0	0	0	0	0	2820	0	0	0	0	0	0	0	0	0	0	0	0	0	0	0	0	0	0	0	0	0	0
AKAPN	500.283	0.1	60	2.7	8.8			0	0	1060	0	0	0	0	0	0	0	0	1760	0	0	0	0	0	0	0	0	0	0	0	0	2470	0	0	0	0	0	440	0	0	1520	0
QLLHLLE	865.519	0.02	60	8.9	5.24			0	0	0	0	0	0	0	0	0	157	0	913	357	0	304	1090	0	0	0	157	0	0	0	0	0	0	0	0	0	0	0	0	0	0	0
E(-18.01)RGLAPPKPVT	1146.67	0.1	60	6.7	8.85		Pyro-glu from E	0	64.7	689	213	0	206	0	0	0	0	0	0	0	0	149	1500	0	0	0	371	1030	665	808	255	418	262	238	281	796	1740	281	0	0	0	359
GRPGPCADVN	493.232	0.09	5.81	7	5.83			0	569	0	0	0	0	0	331	613	242	421	338	0	0	319	0	0	0	0	0	0	0	357	0	0	0	0	0	0	0	0	0	0	0	0
KHLRRLELLQGHLAIRGLQ(+.98)L	1183.23	0.01	2.68	11	11.71		Deamidation (NQ)	462	0	325	0	0	95.9	730	0	0	0	677	207	0	0	341	0	0	0	0	0	0	0	0	884	0	0	0	0	0	0	0	0	0	0	0
LFALAGAVGFVT	583.33	0.01	60	24.3	5.52			2060	0	0	0	0	0	0	778	0	0	0	0	0	0	0	0	0	0	0	0	0	0	0	0	0	0	0	0	0	0	0	0	0	0	0
NEATGGKYVPRAVLVD	563.635	0.03	60	5.4	6.07			0	0	0	0	0	0	0	0	0	0	0	0	0	0	0	0	2840	0	0	0	0	0	1990	0	0	0	0	0	0	0	0	0	0	1480	5920
KVKAG	502.339	0.02	60	4.6	10			0	0	0	0	0	0	0	1620	0	73.3	1150	0	0	0	0	0	0	0	0	0	0	0	0	0	0	0	100	0	0	0	0	0	0	0	0
LIVAT	516.328	0.05	60	8.2	5.52	sp|P21817|RYR1_HUMAN		0	633	0	0	0	0	0	0	0	642	0	0	0	839	0	0	0	735	1060	0	0	1410	0	1040	0	0	0	0	0	756	0	0	1040	1200	0
SFSIGAGSKTPGARQRLQARRQHTRKK	756.439	0.05	60	3.1	12.61			0	0	0	0	0	0	0	0	0	0	0	0	0	2850	0	0	0	0	1260	0	0	0	0	0	0	0	813	459	0	0	0	1660	0	0	0
DDNGDCT	739.217	0.01	60	5.8	3.42			0	0	0	0	0	1380	1490	0	0	0	0	0	0	0	0	0	0	0	0	644	0	0	0	0	0	0	0	0	0	0	0	0	0	0	0
LVEGEIAEEAAEKATSRGSN	687.673	0.01	60	2.6	4.33			0	0	0	0	0	0	0	0	0	0	0	0	0	0	2870	0	0	0	0	0	0	0	0	0	0	1080	4820	2060	0	0	1710	0	0	0	0
PVKLLPPK	446.313	0.05	60	7.1	10.02			0	0	0	0	0	894	1980	0	0	0	0	0	0	0	0	0	0	0	0	2730	0	0	0	0	0	2280	956	0	1350	0	0	0	0	0	0
QPAPC	515.225	0.02	60	1.1	5.52			0	0	0	0	0	0	0	0	0	0	0	0	0	2880	0	0	0	0	0	0	0	0	0	0	0	0	0	0	0	0	0	0	0	0	0
LGTCLAQ(+.98)VQQA	566.784	0.02	60	11.1	5.52		Deamidation (NQ)	0	0	1170	0	0	0	0	0	1710	0	0	0	0	0	0	0	0	0	0	0	0	0	0	0	0	0	0	0	0	0	0	0	0	0	0
AWGAN(+.98)SYGQ	954.394	0.01	60	2	5.57		Deamidation (NQ)	0	2880	0	0	0	0	0	0	0	0	0	0	0	0	0	0	0	0	0	0	0	0	0	0	0	0	0	0	0	0	0	0	963	1420	0
TNICHAA	365.168	0.03	60	8.6	6.4			0	964	0	0	0	0	0	0	0	0	0	0	0	1920	0	0	0	0	0	0	0	0	0	1460	0	0	0	0	0	0	0	0	0	0	0
GSTLGAGVYVLAGA	618.335	0.03	60	13.4	5.52			0	0	0	0	0	0	0	0	0	0	1280	0	0	0	0	0	0	1610	0	0	0	0	0	0	0	0	0	0	0	0	0	0	0	0	0
VPEGSLPVHGEQAL	478.25	0.01	60	5.1	4.51			0	0	0	0	0	0	0	0	0	0	0	0	2890	0	0	0	0	0	0	0	0	0	0	0	0	0	0	0	0	0	495	0	0	0	0
FNDLLVILKL	594.381	0.01	60	6	5.84			0	0	0	0	0	828	0	0	0	0	0	0	422	0	0	0	1640	0	0	0	0	0	0	0	0	0	0	0	0	0	0	0	0	1280	0
Q(+.98)RSHTGEKPYECNEC	594.567	0.01	60	11.6	5.5		Deamidation (NQ)	0	0	585	0	2310	0	0	0	0	0	0	0	0	0	0	0	0	0	0	0	0	0	0	0	0	0	0	556	0	0	0	0	0	0	0
GHSNQCQDGSGICVN(+.98)CQ(+.98)HNTAGEH	625.242	0.09	60	4.1	5.72		Deamidation (NQ)	0	0	0	0	0	0	0	0	0	0	0	0	0	2900	0	0	0	0	0	0	1960	0	0	2480	0	0	0	1080	755	0	918	0	0	1300	1800
KPPPQKSLKELQEMDKDDESLIKY	572.702	0.05	60	5.2	5	sp|P52566|GDIR2_HUMAN		0	0	0	0	2920	0	0	0	0	0	0	0	0	0	0	0	0	0	0	0	2000	0	0	0	0	1710	0	0	1220	0	0	2380	0	0	0
GSMAKK	621.341	0.02	60	3.9	10			0	0	0	0	0	0	0	0	0	0	0	0	0	0	2930	0	0	0	0	0	0	0	0	0	0	0	0	0	2070	0	0	0	0	0	0
Q(+42.01)LTTALRVVGT	600.848	0.01	60	8.1	9.75		Acetylation (Protein N-term)	0	0	0	0	0	0	0	0	0	0	0	0	0	0	0	0	2930	0	0	0	0	0	2670	0	0	0	0	0	0	0	0	0	0	0	2730
KN(+.98)SNLLVIIVVTVGVITVLVVVIVAV	669.432	0.01	60	11.2	8.75		Deamidation (NQ)	0	1390	0	0	0	0	0	0	1540	0	0	0	0	0	0	0	0	0	0	0	2610	0	0	0	0	0	0	0	0	0	0	2570	1730	0	0
QHCQ(+.98)MCECDS	592.68	0.03	60	11.3	4.35		Deamidation (NQ)	0	0	0	0	0	0	2930	0	0	0	0	0	0	0	0	0	0	0	2710	0	0	16200	0	0	0	0	0	886	0	0	0	0	0	0	0
TKGVVPSPR	940.581	0.04	2.25	11.1	11			0	0	0	913	161	404	0	0	0	521	0	0	81.8	582	0	271	0	0	0	93.1	0	170	0	0	414	62.9	0	0	7.58	305	0	0	459	0	0
RGPAGPN(+.98)GADGPQ(+.98)GPPGGVGN	610.952	0.02	60	11.5	5.84		Deamidation (NQ)	0	0	0	0	0	0	0	0	0	0	0	0	0	2940	0	0	0	0	0	0	0	0	0	0	0	1260	0	0	0	0	0	0	0	0	0
Q(-17.03)LLVPGGVG	822.504	0.02	3.32	6.8	5.52		Pyro-glu from Q	0	0	0	0	608	0	748	0	0	1140	0	0	0	0	0	0	444	0	4940	0	0	0	0	0	0	659	0	0	0	0	0	0	0	620	0
KTKEGVLYVGSKTKEGVVHGVATVAE	538.1	0.08	60	2.9	8.39			0	0	0	0	0	0	0	0	0	0	0	0	0	0	0	0	2940	0	0	0	0	0	0	0	0	1880	0	0	0	2840	0	1820	2220	0	2900
DDPDAPLQPVTPLQLF	883.451	0.03	5.58	4.7	3.42			360	0	0	0	0	0	0	0	0	571	0	0	0	0	0	0	2010	0	0	0	15200	1010	11500	1370	0	706	824	0	0	0	0	0	0	0	0
VNRVIPTNV	1011.62	0.07	2.07	6.6	9.72			0	0	93.1	126	0	408	0	745	0	45.1	0	827	21.3	0	496	0	180	0	4100	0	0	0	62.4	156	463	309	0	0	263	0	94	0	126	0	123
AGGTGLSLGALVIVLASALLLLVLVLL	853.892	0.01	60	1.9	5.57			0	2950	0	0	0	0	0	0	0	0	0	0	0	0	0	0	0	0	0	0	0	0	0	0	0	0	0	1680	0	0	0	0	0	0	0
AFKVPAPK	429.27	0.09	60	5.7	10			0	0	0	0	1690	0	1260	0	0	0	0	0	0	0	0	0	0	0	2140	0	2310	0	2940	3880	0	0	0	652	1510	1960	0	0	2110	0	0
PPQAIGKAV	880.525	0.01	60	8.5	9.18			0	0	0	0	0	0	0	0	0	935	0	0	0	0	0	361	1660	0	0	0	0	0	0	0	0	0	0	0	1710	0	0	0	0	0	0
IDKKYAGFIHMKAVAGMKMS	557.301	0.05	60	6.7	9.83			0	0	0	0	0	0	0	0	0	0	0	0	648	1560	751	0	0	0	0	0	0	0	0	0	0	0	0	732	0	1200	0	1490	0	680	0
KKAPK	571.4	0.05	60	2.8	10.3			0	0	0	534	0	608	1100	0	0	0	0	717	0	0	0	0	0	0	0	736	0	978	0	0	563	1710	0	372	0	0	0	0	0	0	591
LAPLAEDVR	492.276	0.04	60	7.2	4.37			0	0	0	0	0	0	0	0	0	2960	0	0	0	0	0	0	0	0	0	0	0	0	0	0	0	0	0	0	0	0	0	0	0	0	0
PPVVVNLST	925.563	0.05	3.91	10	5.96			0	0	0	441	1670	0	0	0	0	257	0	0	0	319	0	189	0	89.3	874	105	116	0	441	0	0	234	381	451	31.8	0	166	185	0	329	0
AQ(+.98)AAPQAQ(+.98)AGPTASPAYSSYQPTPT	821.722	0.01	60	9.1	5.57		Deamidation (NQ)	0	0	0	0	0	0	0	0	0	0	0	0	0	2970	0	0	0	0	0	0	0	0	0	0	0	0	2080	0	0	0	991	0	0	3950	0
HGDGSELDDEGMQSDDPESIRSERGNSRMNSAGMKSKESGENSEQ(+.98)AN	1012.02	0.01	60	7.5	4.3		Deamidation (NQ)	0	2970	0	0	0	0	0	0	0	0	0	0	0	0	0	0	0	0	0	0	9650	0	0	0	0	6110	0	0	0	0	0	0	0	6560	0
TQLKGIKG	844.524	0.01	60	8.7	10			0	0	0	0	0	0	0	2460	0	294	0	0	218	0	0	0	0	0	0	0	0	0	0	197	594	81.5	0	208	0	0	124	0	0	0	0
Q(-17.03)DLLGAPVLLFLHPEDRPLM(+15.99)LAIHKKILQ(+.98)LAGQ	922.769	0.02	60	4.2	6.92		Pyro-glu from Q; Oxidation (M); Deamidation (NQ)	0	0	0	1790	0	0	1190	0	0	0	0	0	0	0	0	0	0	0	0	0	0	0	0	0	860	0	0	0	0	0	2550	0	0	0	0
KALVVSVNVS	1015.62	0.06	3.61	11.4	8.75	sp|Q8WXH0|SYNE2_HUMAN		76.5	0	156	0	0	0	277	351	0	155	0	260	1110	0	0	315	282	0	284	39.1	0	0	181	0	294	0	275	291	164	0	0	303	0	185	0
KVIYGSSAG	441.245	0.01	60	1.9	8.59			0	0	0	0	0	0	0	0	0	0	0	0	0	0	0	0	2990	0	0	0	0	0	0	0	0	0	0	3690	0	3940	0	0	0	0	0
AYGGSATIVN(+.98)KPKYGSDDECSSGTSGSADSNGNQSFGA	922.643	0.02	60	5.8	4.23		Deamidation (NQ)	0	0	0	0	0	1080	0	0	0	0	0	0	1910	0	0	0	0	0	0	0	3720	1940	6040	0	0	0	0	0	0	0	0	0	1380	0	7790
SKGIKGGKKVY	1164.7	0.09	2.72	8.3	10.18			0	0	0	372	519	0	1090	0	0	0	0	0	0	0	348	452	219	0	283	236	503	511	410	984	905	262	184	0	0	558	557	271	69.8	237	699
AAPLRPT	725.421	0.03	60	5.5	9.79			0	0	0	0	0	0	0	3000	0	0	0	0	0	0	0	0	0	0	0	0	0	0	0	5320	0	0	3510	0	0	0	0	0	0	0	0
FVKVVKN	417.275	0.03	60	9.9	10			0	0	0	0	0	0	0	0	0	0	0	285	0	658	2060	0	0	0	0	0	0	0	0	0	0	1020	0	395	509	0	0	0	0	588	0
GLFAASGTRN(+.98)ASQGAGSS	547.263	0.02	60	10.6	9.75		Deamidation (NQ)	2170	0	0	0	0	0	839	0	0	0	0	0	0	0	0	0	0	0	0	0	0	0	0	21200	0	0	0	0	0	0	0	0	0	853	0
AMSQDM(+15.99)GNTQDMFSPDQ(+.98)SSM(+15.99)PMSNVGTT	757.801	0.02	60	11.4	3.42		Oxidation (M); Deamidation (NQ)	0	0	0	0	708	0	0	0	1350	0	0	0	0	954	0	0	0	0	0	0	2270	0	0	4820	0	2420	0	0	0	0	0	0	0	0	0
ITPGDPRLV	967.574	0.02	60	8.2	5.84			0	0	0	0	0	0	0	0	539	261	0	0	0	0	0	0	1990	228	0	0	0	0	0	0	0	0	0	0	341	0	562	0	0	58.6	133
TVTQNVEVPETPKASKALE	681.031	0.02	60	5	4.78			0	0	0	0	0	0	0	930	0	0	0	0	0	0	0	0	2090	0	0	0	0	0	1840	0	0	0	0	0	0	0	0	0	0	0	0
RHWGLIRYISGILRKKVEA	765.798	0.01	5.41	7.2	11			2120	0	0	0	0	0	0	0	0	0	0	521	385	0	0	0	0	0	0	0	0	2460	0	0	2810	0	0	1500	17300	0	0	0	0	0	0
RLSQPPLV	909.563	0.01	60	8.4	9.75			110	2660	87.8	0	0	0	0	0	170	0	0	0	0	0	0	0	0	0	0	0	0	0	0	714	0	0	0	0	0	0	0	0	0	0	0
Q(-17.03)KGTEIKPGQNNPVPVSE	635.666	0.01	60	19.4	6.14		Pyro-glu from Q	0	0	0	0	0	0	0	0	0	3030	0	0	0	0	0	0	0	0	0	0	0	0	0	0	0	0	0	0	0	0	0	0	0	0	0
N(+.98)LQ(+.98)SGEVTQLLNTMGH	872.412	0.01	60	0	5.24		Deamidation (NQ)	0	0	0	0	0	0	0	0	0	0	0	3040	0	0	0	0	0	0	0	0	0	0	0	0	0	0	0	0	0	0	0	0	0	0	0
ASKRMALVL	988.584	0.05	6.02	9.9	11			680	0	0	0	0	204	0	0	258	64.6	0	0	0	0	291	1550	0	0	1280	0	495	907	0	26.3	382	0	1070	0	0	249	0	0	0	0	51.5
QPPYLDAKPPT	613.825	0.01	60	0	5.83			0	0	0	0	0	0	0	0	0	0	3050	0	0	0	0	0	0	0	0	0	0	0	0	0	0	0	0	0	0	0	0	0	0	0	0
NM(+15.99)GM(+15.99)GT	642.211	0.05	60	4.5	5.52	sp|Q09472|EP300_HUMAN	Oxidation (M)	0	0	0	0	0	0	0	0	0	0	0	0	1590	0	0	0	1460	0	6490	0	0	0	0	0	0	0	0	0	0	0	0	0	0	0	0
YVLLAGI	748.448	0.01	5.14	10.3	5.52			0	2020	0	0	0	0	0	0	0	207	0	462	378	0	0	0	0	0	0	0	0	0	0	0	0	0	0	172	0	0	0	0	0	0	0
EVRGQ(+.98)VQMDVDLQSVDINQ(+.98)CASGPGWYSNTHLCDLNSTQ(+.98)CV	903.393	0.08	60	8.2	4.03		Deamidation (NQ)	0	0	0	0	0	0	3070	0	0	0	0	0	0	0	0	0	0	0	0	1520	0	0	0	0	0	6480	3910	1980	3610	6610	0	0	0	0	0
PPPGA	438.232	0.06	60	8.2	5.96			0	0	3070	0	0	0	0	0	0	0	0	0	0	0	0	0	0	0	0	10300	7080	0	13700	15000	0	0	0	3390	0	0	0	0	0	11400	0
KKSAP	530.332	0.01	60	0	10			0	3080	0	0	0	0	0	0	0	0	0	0	0	0	0	0	0	0	0	0	0	0	0	0	0	0	0	0	0	0	0	0	0	0	0
SESGSFRPDSPGSGNARPNNPDWGTF	912.736	0.02	60	9.3	4.56	sp|P02671|FIBA_HUMAN		0	0	0	0	0	0	0	0	0	0	0	3080	0	0	0	0	0	0	0	0	0	0	0	0	0	2860	0	0	0	0	0	0	0	0	0
QQQ(+.98)QQ(+.98)QQQQQQQQQGSAGMAGGMAGHG	714.537	0.01	60	9.4	6.74		Deamidation (NQ)	0	0	0	0	0	0	0	0	0	0	3080	0	0	0	0	0	0	0	3320	0	0	0	0	0	0	0	0	0	0	0	0	0	0	0	0
INGYVPESI	496.244	0.08	60	10.3	4			0	0	0	0	0	0	0	0	0	0	0	0	0	0	0	0	3080	0	0	0	0	0	785	2800	0	0	0	0	0	0	0	0	0	0	0
SVM(+15.99)PSPKVSDTVVEPYN	932.961	0.01	60	14.3	4.37		Oxidation (M)	0	0	0	0	0	0	0	0	0	0	0	0	0	0	900	0	0	2180	0	0	0	0	0	0	0	0	0	0	0	0	0	0	0	0	5270
RGPKPKPLVVQ	609.9	0.01	60	10.8	11.17			0	0	0	0	0	0	0	0	0	0	0	0	282	0	0	2800	0	0	0	0	0	0	0	58.8	0	0	0	0	0	0	0	0	0	7030	0
QAVLKVPGN	925.562	0.1	1.55	9.7	8.75			0	0	0	558	440	0	0	59.6	0	420	259	0	0	773	198	196	0	179	936	41.9	435	0	1030	0	0	209	313	373	769	0	144	207	191	239	72.6
QDGGCVPIGHCDCTDAQ(+.98)GHSWAPGSQHQDACNNCSCQAGQ(+.98)LSCTAQPC	978.988	0.02	60	12.6	4.52		Deamidation (NQ)	0	0	0	0	3090	0	0	0	0	0	0	0	0	0	0	0	0	0	0	756	0	0	0	0	0	0	0	0	0	0	0	2040	1810	0	0
QVPTAMSSS	454.207	0.02	3.53	9.5	5.52			293	0	0	842	0	0	0	0	225	0	0	0	0	0	0	1740	0	0	0	0	0	0	0	0	0	0	0	0	0	0	0	1030	0	0	0
KSN(+.98)KLLLALVMLFLFAVIVLQ(+.98)YVCPGT	999.246	0.02	60	9	9.2		Deamidation (NQ)	0	0	0	0	0	0	0	0	0	0	0	3110	0	0	0	0	0	0	4650	454	0	2690	0	0	946	0	0	429	0	1500	0	0	0	75.6	0
GPDSPACLEGEM(+15.99)GT	690.275	0.03	60	9.7	3.57		Oxidation (M)	146	0	0	449	0	442	0	234	0	0	1840	0	0	0	0	0	0	0	0	0	0	0	0	0	1200	0	0	0	0	0	0	0	172	0	0
IHVKPVAAG	891.535	0.02	5.56	9.3	8.76			0	0	162	0	0	0	0	0	0	594	0	0	0	274	0	1480	251	351	0	0	0	0	2460	0	0	0	0	0	0	0	0	0	0	0	473
DSSSQ	523.198	0.08	60	5.3	3.8			0	0	0	332	0	0	0	0	0	0	0	0	0	2110	0	0	0	683	0	644	0	0	0	0	816	2360	0	569	0	0	1790	1130	0	0	0
Q(-17.03)LQLIIKKVIA	625.419	0.03	60	11.5	10		Pyro-glu from Q	0	0	0	0	0	1100	0	0	0	0	0	639	0	1390	0	0	0	0	0	0	0	177	0	1200	0	751	0	0	0	0	0	0	0	0	0
ETKENEGFTVTAEGK	547.278	0.01	60	0	4.49	sp|P01024|CO3_HUMAN		0	0	3140	0	0	0	0	0	0	0	0	0	0	0	0	0	0	0	0	0	0	0	0	0	0	0	0	0	0	0	0	0	0	0	0
PAGTGT	503.243	0.07	60	9.1	5.96			399	598	0	0	0	0	0	0	0	698	0	1450	0	0	0	0	0	0	0	0	0	0	0	0	0	0	0	0	0	0	0	0	0	0	0
F(+42.01)TALGLQK	919.544	0.02	60	10.7	8.75		Acetylation (Protein N-term)	1200	0	0	0	0	0	0	0	0	646	0	1300	0	0	0	0	0	0	0	0	1710	886	289	0	0	231	0	0	0	0	0	0	0	0	0
YKMADEAGSEADHEGTHSTKRGHAKSRPV	631.303	0.05	60	4	7.03	sp|P02671|FIBA_HUMAN		0	0	0	759	0	0	0	0	0	0	0	0	0	2390	0	0	0	0	2640	0	2240	0	4850	2500	0	2070	0	0	0	0	0	0	0	1020	0
Q(-17.03)SGSEGPVG	800.329	0.01	60	2.5	4		Pyro-glu from Q	0	0	3150	0	0	0	0	0	0	0	0	0	0	0	0	0	0	0	0	0	0	0	0	0	0	0	0	0	0	0	0	0	0	6010	0
TCVEGTIPK	474.251	0.01	60	9.1	5.66			0	0	0	0	432	0	0	0	0	0	0	0	900	0	1820	0	0	0	0	0	0	0	14600	2810	0	2900	0	0	0	7500	0	0	8480	0	1160
GDSTFESKSYKMA	484.222	0.19	60	2.7	6.07	sp|P02671|FIBA_HUMAN		0	0	0	0	325	0	0	0	0	2240	0	593	0	0	0	0	0	0	0	0	0	633	0	0	0	0	0	0	471	0	0	0	0	0	0
T(+42.01)LLLLLLVLLELGEAQGSLHRVPLRRHPSLKKKLRARSQ(+.98)LS	939.97	0.01	60	7.9	11.84		Acetylation (Protein N-term); Deamidation (NQ)	0	0	0	0	0	1900	0	0	0	0	0	0	0	1260	0	0	0	0	1600	2390	0	0	0	4010	0	0	0	0	0	0	0	0	0	0	0
RPANPSAYAAAYAGPDGAYPQ(+.98)GAGSA	613.785	0.01	60	4.3	5.83		Deamidation (NQ)	0	0	0	0	0	0	0	0	0	0	0	0	0	3180	0	0	0	0	0	0	0	0	0	0	0	0	1270	179	0	0	0	3840	0	0	0
L(+42.01)SVLEVLLIIFCLIVVTIDILLLLLVLEE	827.24	0.01	60	9.6	3.5		Acetylation (Protein N-term)	0	0	0	0	0	0	0	0	0	1620	1560	0	0	0	0	0	0	0	0	11000	0	0	0	0	0	0	0	0	0	0	0	0	0	0	0
LKNSKGKIT	988.609	0.08	6.12	9.6	10.3			439	0	271	0	311	658	0	0	0	183	0	0	0	211	314	795	0	0	904	0	0	0	0	294	1250	0	437	0	0	132	0	88.4	0	315	265
QASCSNYDT	988.357	0.01	60	9.3	3.8			0	0	0	0	576	0	0	1710	0	400	496	0	0	0	0	0	0	0	0	0	0	0	0	0	0	0	0	0	656	3350	0	0	0	0	0
KKIKN	630.435	0.06	60	5.9	10.3			0	0	834	0	0	0	0	0	0	0	0	0	0	1180	527	0	646	0	0	0	1130	895	4190	1120	838	0	0	477	0	683	0	835	0	1140	0
SSGSGSGGGGG	766.288	0.01	60	0	5.24			0	0	0	0	0	0	0	0	0	0	0	0	0	0	0	3190	0	0	0	0	0	0	0	0	0	0	0	0	0	0	0	0	0	0	0
Q(+.98)NELELHKEN(+.98)LN(+.98)LREIDHTK	1238.62	0.01	60	0	5.42		Deamidation (NQ)	0	0	0	0	0	0	0	0	0	0	0	0	0	0	0	0	3190	0	0	0	0	0	0	0	0	0	0	0	0	0	0	0	0	0	0
RIRINLVLALIYNLVGIPIAAGVFM(+15.99)PIGIVLQ	1159.37	0.01	60	8.5	10.84		Oxidation (M)	0	0	0	0	165	0	0	0	0	0	0	0	0	335	2690	0	0	0	0	774	0	0	370	0	0	1550	1840	181	648	0	0	0	0	0	0
LLLLVAIVGFQ	593.391	0.01	60	3.3	5.52			0	0	0	0	0	0	3190	0	0	0	0	0	0	0	0	0	0	0	0	5190	0	904	0	0	0	4160	0	0	0	0	0	0	0	0	0
CSCDPQ(+.98)GAVRDDCEQ(+.98)MTGLCS	1110.4	0.07	60	7.4	3.84		Deamidation (NQ)	0	0	0	0	0	0	0	0	0	0	0	0	0	0	0	0	3190	0	0	0	6310	0	10900	5290	0	0	0	0	0	0	0	0	0	0	0
TGTVLGGVLGQKRWQYDVWSTDVTVAN(+.98)KM	1070.89	0.01	60	0	8.17		Deamidation (NQ)	0	0	0	0	0	0	0	0	0	3210	0	0	0	0	0	0	0	0	0	0	0	0	0	0	0	0	0	0	0	0	0	0	0	0	0
PPGPAGPAGIMGPP	1215.61	0.01	60	0	5.96			3210	0	0	0	0	0	0	0	0	0	0	0	0	0	0	0	0	0	0	0	0	0	0	0	0	0	0	0	0	0	0	0	0	0	0
KVPPQKPRR	553.35	0.07	3.32	7.5	12.02			0	0	0	0	1320	174	0	237	0	0	782	0	0	697	0	0	0	0	0	0	0	0	0	2090	1270	1800	0	1890	0	2360	456	0	1930	0	0
LPLHLALFP	510.825	0.03	60	7.5	6.74			0	0	0	0	0	0	267	296	0	0	0	0	0	0	0	1460	1190	0	0	0	0	0	0	2280	0	0	2110	93.4	2830	0	0	0	0	0	0
GFFPSSLA	413.211	0.02	60	4.1	5.52			0	0	0	0	0	0	0	0	0	0	0	0	0	0	0	0	0	3220	0	0	0	0	0	0	0	0	0	0	0	0	0	0	0	0	0
TGPPGPAGQ	781.403	0.01	60	9.1	5.19			0	0	0	0	0	0	0	0	0	0	0	0	0	0	3220	0	0	0	0	0	0	0	0	0	0	0	0	0	0	0	0	0	0	0	0
KKKVIMKKRKKLTLTR	667.112	0.01	60	13.9	12.05			0	0	0	0	0	0	0	0	0	0	0	0	0	0	3220	0	0	0	0	0	0	0	0	0	0	0	0	0	1740	0	0	0	0	0	0
QDN(+.98)SFDLNN(+.98)GSDAEQEEMETQSSDFPPSLTQ(+.98)PA	1211.18	0.02	60	9.5	3.19		Deamidation (NQ)	0	0	0	0	0	0	254	0	0	0	0	0	0	0	0	0	0	2970	0	0	0	0	0	0	0	0	0	0	0	0	0	0	0	0	0
GFAIK	535.332	0.01	60	7.9	8.75			0	0	0	0	0	0	0	0	0	0	3230	0	0	0	0	0	0	0	0	0	0	0	0	0	0	0	0	1210	0	0	0	0	0	8950	0
ACVGADLQAEMCN(+.98)TQACEKTQLEFM(+15.99)SQQCARTDGQ	957.144	0.01	60	2.6	4.18		Deamidation (NQ); Oxidation (M)	0	0	0	0	2050	0	1180	0	0	0	0	0	0	0	0	0	0	0	0	0	0	0	0	0	0	0	0	0	0	0	4030	0	0	14900	0
HPLLVFV	824.504	0.02	60	7.9	6.74			0	0	0	0	0	0	0	0	0	260	108	0	171	0	0	0	2700	0	2910	2490	0	0	0	524	1270	0	0	0	0	0	0	2760	0	0	0
SSVKKIIKQ	515.84	0.01	60	5.9	10.3			0	0	0	0	1750	0	0	0	1490	0	0	0	0	0	0	0	0	0	4410	0	0	0	0	0	0	0	0	0	0	0	0	0	0	0	0
VAPLAITYVREKVI	786.486	0.06	3.28	9.4	8.56			0	0	0	0	381	183	0	0	0	0	472	268	0	0	0	88	1380	469	0	811	298	0	0	885	0	199	0	0	0	0	1020	0	447	0	0
GEKVVSLFVGVA	1204.72	0.03	5.45	10.1	6			0	755	0	1640	0	29.6	296	0	0	0	0	0	0	0	524	0	0	0	0	5380	0	931	0	560	45.6	1350	672	0	0	0	741	1620	88.4	0	4330
VVKAPPTQPVLPPQTIIQQPQPLIQ(+.98)PPPLVQ	1121.69	0.01	60	11.3	8.72		Deamidation (NQ)	0	0	0	0	0	0	1480	0	0	0	0	0	1770	0	0	0	0	0	386	666	0	0	0	1340	0	0	0	0	0	0	0	0	1220	0	0
LLPVNLKLVPGYKKVIKKPM	760.131	0.05	3.19	10.5	10.3			0	95.2	0	88.5	0	1290	0	0	161	0	0	374	0	197	0	636	409	0	0	0	0	0	0	0	473	1010	0	0	1230	306	0	0	216	234	0
PPLPPALIPAL	1098.67	0.11	3.28	10.1	5.96			169	0	0	0	130	150	192	0	0	296	0	45.1	0	0	504	538	230	1000	810	328	267	0	0	455	83.5	668	482	113	765	104	215	335	131	0	115
R(+42.01)FLAERGGR	552.304	0.03	60	2.2	11.7		Acetylation (Protein N-term)	0	1010	0	0	0	0	0	0	2250	0	0	0	0	0	0	0	0	0	0	0	0	0	0	0	0	0	0	0	0	0	0	0	0	0	0
Q(-17.03)AAGAERAEEAAGPGAAALQREAAYNWQ(+.98)A	583.275	0.1	3.13	3.1	4.49		Pyro-glu from Q; Deamidation (NQ)	0	470	518	0	0	0	0	0	249	0	294	0	0	0	808	554	375	0	0	0	0	0	0	0	453	0	0	0	300	0	0	287	0	0	1080
LILPPRAGT	469.291	0.01	60	8.7	9.75			0	0	0	0	0	0	0	3270	0	0	0	0	0	0	0	0	0	0	0	0	0	0	0	0	0	0	0	10600	0	14700	0	0	0	0	0
ALEDSSLAPGNTW	680.82	0.1	60	7.9	3.67	sp|Q9ULL8|SHRM4_HUMAN		0	643	0	0	0	0	0	0	501	0	0	0	495	0	0	564	0	1070	1660	0	0	316	0	0	497	0	0	0	0	460	0	0	0	0	0
DLVIGK	644.411	0.01	60	9.8	5.84			0	0	0	0	0	0	0	0	0	0	0	0	525	2750	0	0	0	0	0	0	0	0	1390	0	0	0	0	0	0	0	1630	0	0	0	0
TPALEELVPGSEEK	749.896	0.05	60	9.8	4.09			402	0	497	0	0	0	908	655	815	0	0	0	0	0	0	0	0	0	783	536	430	0	916	0	0	328	0	310	0	89.8	0	1540	790	2410	833
DKTERELLESYIDG	834.411	0.03	60	0.5	4.18			0	0	0	0	0	0	3280	0	0	0	0	0	0	0	0	0	0	0	0	0	0	0	0	0	0	4780	0	0	0	0	0	0	0	0	0
TKPVPK	669.438	0.01	60	8	10			0	0	0	0	0	3280	0	0	0	0	0	0	0	0	0	0	0	0	0	277	0	8140	0	0	0	0	0	0	0	0	0	0	0	0	0
N(+.98)GTGGAK	605.3	0.02	60	11.2	8.75		Deamidation (NQ)	0	2340	0	0	0	0	0	0	0	0	0	0	0	0	592	0	351	0	0	0	0	0	0	0	0	0	0	0	0	886	0	0	0	0	0
GIRIRSGNILIHAAVM(+15.99)T	613.369	0.02	60	13.5	12		Oxidation (M)	0	0	0	0	0	0	0	0	0	0	0	3290	0	0	0	0	0	0	0	0	0	0	0	0	0	0	0	0	0	0	0	0	0	0	0
KNRLPRSV	969.596	0.04	60	10.4	12.01			858	0	1050	0	266	567	269	95.3	0	80.9	0	109	0	0	0	0	0	0	280	230	0	0	0	0	0	620	155	0	64.3	632	0	0	1450	0	85.1
KLSGLK	645.435	0.01	60	7.1	10			0	0	0	0	0	805	0	0	0	0	0	0	0	0	0	0	2500	0	0	987	0	0	0	0	1170	0	0	0	0	0	646	0	0	0	0
HGLFKKLGI	1012.62	0.05	4.59	8.7	10			0	0	208	0	32.2	0	0	0	0	492	0	39	0	815	320	0	628	774	538	0	607	0	0	542	118	0	358	0	177	0	19.9	583	209	0	0
EGNGDSGGSFQN(+.98)GHAQ(+.98)LMTDFEK	810	0.02	60	5.7	4.31		Deamidation (NQ)	0	0	0	0	0	0	0	2310	0	0	0	0	0	0	1010	0	0	0	0	1200	3730	0	0	0	0	0	0	411	0	0	994	0	0	0	0
QMVQ(+.98)VSDQDM(+15.99)N(+.98)T	707.298	0.03	60	12.8	3.56		Deamidation (NQ); Oxidation (M)	368	0	0	0	0	2820	0	0	0	0	0	0	137	0	0	0	0	0	376	0	0	0	0	0	0	0	0	174	0	0	0	251	0	0	0
VKMVKDLVASLKPGTQVIVLSTRLLKPLNIPEL	904.059	0.02	5.32	6.4	10			0	0	0	0	0	205	607	0	0	0	0	0	1690	0	823	0	0	0	0	0	0	0	0	778	0	0	0	0	0	0	0	0	0	324	0
HIGALLAVRG	1006.61	0.09	3.83	9.7	9.76			0	0	225	0	92.3	0	0	644	0	42.7	0	169	513	0	320	0	1320	0	543	0	422	537	151	96.4	0	0	531	426	382	0	0	402	0	417	779
EDSGEGKKESLESEA	797.858	0.01	60	0	4.14			0	0	0	0	0	0	0	0	0	0	0	0	0	3330	0	0	0	0	0	0	0	0	0	0	0	0	0	0	0	0	0	0	0	0	0
REREIKKALIIKLRRGKPGFQGQ	907.888	0.01	60	7.1	11.58			0	0	2260	0	0	0	0	0	1070	0	0	0	0	0	0	0	0	0	1780	0	0	0	0	0	2170	1060	0	0	0	0	0	1250	0	2690	0
KTKEGVLYVGSKTKEGVVHGVA	572.323	0.01	60	9.4	9.4			0	0	0	0	0	0	0	0	0	0	0	0	1380	0	0	0	1960	0	0	0	0	0	0	0	0	0	0	0	0	0	0	1520	1220	0	0
RKLPAPGADV	1023.61	0.1	6.61	9.2	8.75			218	0	180	93.4	175	827	881	0	614	268	0	0	0	0	0	0	0	92	694	49.7	408	314	1700	0	368	545	246	509	2460	1770	48.1	0	454	0	2590
REGNKDGVFSM	620.297	0.01	60	5.9	6.07			0	1060	0	0	0	0	0	0	2290	0	0	0	0	0	0	0	0	0	0	0	0	0	1460	0	0	0	0	0	0	0	0	0	0	0	0
HVQPQPQPKPQVQLHVQSQTQPVS	679.608	0.03	60	11.7	8.76	sp|Q15942|ZYX_HUMAN		0	0	0	0	0	0	0	0	0	0	0	0	1450	0	1900	0	0	0	0	0	0	0	0	0	0	0	0	1180	0	1010	293	0	0	0	1470
HGPRGVVRG	934.565	0.03	1.36	11	12			0	0	0	212	0	594	180	1140	0	0	0	0	0	0	336	325	0	563	80	4220	269	5.44	0	0	0	28.7	0	0	0	0	0	0	435	467	0
YNTCEGAFGALQ(+.98)KICED	931.901	0.01	60	0	4.14		Deamidation (NQ)	0	0	0	0	0	0	0	0	0	3370	0	0	0	0	0	0	0	0	0	0	0	0	0	0	0	0	0	0	0	0	0	0	0	0	0
QDSIGEGVTQGDYTPMEDSEETSQSLQ(+.98)IDLGPLQ(+.98)SDQ(+.98)QTTTSSQDGQ	1007.64	0.01	60	11.8	3.08		Deamidation (NQ)	0	0	0	0	0	0	0	0	0	0	0	0	435	0	0	0	0	2940	0	0	0	0	4170	0	1490	0	0	0	0	0	600	0	0	0	0
RGMPGLPGPAGTPGKVGPTGATGDKGPPGPVGPP	607.121	0.01	60	2.1	9.99	sp|P05997|CO5A2_HUMAN		0	0	0	0	0	0	0	0	0	0	0	0	0	0	1120	0	1470	787	0	0	0	0	0	0	0	0	0	0	0	0	0	0	0	0	1520
LSKHIKT	826.524	0.01	60	8	10			0	0	0	0	0	0	258	0	0	341	1330	461	814	0	0	0	178	0	0	0	0	0	0	0	0	0	0	0	0	0	0	0	0	0	0
SSGPYG	567.24	0.01	60	14.1	5.24			0	0	0	0	0	0	0	0	0	0	0	0	3390	0	0	0	0	0	0	0	0	0	0	0	0	0	0	0	0	0	0	0	0	607	0
STFESKSYKMADEAGSEADHEGTHST	701.299	0.01	60	2.8	4.63	sp|P02671|FIBA_HUMAN		0	0	0	0	0	0	0	0	0	0	0	0	0	3390	0	0	0	0	0	0	0	0	0	2390	0	0	0	0	0	0	0	0	0	2480	0
TATSEYQTFF	597.768	0.04	60	6.4	4			0	0	0	0	0	1150	0	0	1350	0	0	892	0	0	0	0	0	0	0	0	0	0	0	0	0	0	0	0	0	0	0	0	0	0	0
GQ(+.98)CQ(+.98)CM(+15.99)PGFGGR	629.73	0.03	60	6.1	8.07		Deamidation (NQ); Oxidation (M)	0	0	0	0	0	0	0	0	0	0	0	0	0	0	0	0	527	2870	5230	0	0	0	0	0	0	0	0	0	0	0	0	0	1920	0	0
S(+42.01)DKPDM(+15.99)AEIEKFDKSKLKKTETQEKNPLPSKETIEQEKQAGES	1245.13	0.04	60	8	5.02	sp|P62328|TYB4_HUMAN	Acetylation (Protein N-term); Oxidation (M)	0	0	0	0	0	0	0	2040	0	0	1360	0	0	0	0	0	0	0	0	0	2140	0	0	0	0	0	0	0	0	0	0	0	0	0	0
V(+42.01)LRPV	625.401	0.02	2.83	8.5	9.72	sp|Q8N3K9|CMYA5_HUMAN:sp|O14924|RGS12_HUMAN	Acetylation (Protein N-term)	0	0	350	0	0	0	308	0	0	273	0	533	0	0	0	0	1940	0	0	0	0	0	0	2150	0	0	0	0	0	0	0	0	0	0	0
GLKQ(+.98)VMAIKSRVVLPYLVPKLTTPPVN(+.98)TRVLA	1168.71	0.05	60	9.4	11.17		Deamidation (NQ)	0	0	1640	0	0	1.73	0	0	0	0	0	0	0	0	1480	0	287	0	621	1080	346	1870	0	2370	0	4150	410	1600	1080	5910	1010	904	1860	0	483
KGQKLIKQIQELEEVLSGLTLSPEQG	955.887	0.02	60	6.6	4.95			0	0	0	0	0	0	0	0	3410	0	0	0	0	0	0	0	0	0	0	0	0	0	0	3090	1490	0	1430	0	0	0	0	1330	1070	0	0
GIPPPPPPPLL	1094.66	0.06	5.87	7.4	5.52			0	0	254	152	458	382	0	0	0	85.6	0	0	0	0	2080	0	0	0	726	91.5	83.6	0	0	590	923	0	0	659	280	0	0	295	109	526	514
VPARYRKEQ(+.98)TLLKQLPCIPLVENLLKDGTD	863.715	0.01	60	6.4	8.13		Deamidation (NQ)	0	0	719	0	0	0	0	0	0	0	0	0	0	0	0	0	2700	0	0	0	0	0	0	0	0	2670	461	0	0	0	0	0	0	0	0
KVHVIGN(+.98)RLKLLLKEVSRHIKELEKLLD	831.253	0.02	60	8.5	9.82		Deamidation (NQ)	0	0	0	0	0	0	0	0	0	2440	0	0	0	980	0	0	0	0	6460	0	0	0	6320	0	4460	0	0	0	4620	0	0	0	0	0	0
LDKKREEAPSLRPAPPPISGGGY	609.58	0.01	60	0	8.5	sp|P02675|FIBB_HUMAN		0	0	0	0	0	0	0	0	0	3430	0	0	0	0	0	0	0	0	0	0	0	0	0	0	0	0	0	0	0	0	0	0	0	0	0
SLNQMNTQT	518.746	0.05	60	7.9	5.24			1790	0	0	1650	0	0	0	0	0	0	0	0	0	0	0	0	0	0	0	0	0	0	0	0	0	0	0	0	0	0	0	0	0	9800	0
LVNCSKK	791.452	0.02	60	6.8	9.31			0	0	0	0	0	0	0	0	0	0	0	0	0	3450	0	0	0	0	0	0	0	0	0	0	0	2370	0	0	0	0	0	0	0	0	0
KKEFAILIS	524.819	0.02	60	9.5	8.59			0	0	0	0	0	0	0	0	0	0	0	0	0	0	0	0	3450	0	0	0	0	0	10300	24300	0	0	0	0	0	0	0	0	0	13800	0
TCCEST	643.203	0.06	5.59	8.8	4			3110	34.9	0	0	0	0	0	0	15	0	6.82	0	214	41.2	37.5	0	0	0	0	0	0	0	20.3	0	0	41.1	2480	21.6	8.27	0	0	0	21.8	0	45.1
AEEVHSDPCENNPCLHGGTCNANGT	643	0.08	60	7.7	4.39			1490	0	0	0	0	0	0	1970	0	0	0	0	0	0	0	0	0	0	0	1120	0	0	0	0	0	3130	4320	2960	2960	0	2420	0	0	0	0
SSPSSSN(+.98)SSS	464.178	0.01	60	0	5.24		Deamidation (NQ)	0	0	0	0	0	0	0	0	0	0	0	0	0	0	0	0	0	3480	0	0	0	0	0	0	0	0	0	0	0	0	0	0	0	0	0
KGPGGGAPVR	448.259	0.02	60	1	11			0	0	0	0	0	0	0	0	0	0	1010	2490	0	0	0	0	0	0	0	0	0	0	0	0	0	0	0	0	0	0	0	0	0	0	0
HKRSRR	420.26	0.01	60	5.2	12.3			0	0	0	0	0	0	0	3500	0	0	0	0	0	0	0	0	0	0	0	0	0	0	0	0	0	0	2920	0	0	0	0	0	0	0	0
VRILINDAYKRTVALLTEKKADVEK	722.437	0.03	60	11.1	9.4			1080	0	0	176	622	0	0	1290	342	0	0	0	0	0	0	0	0	0	0	0	0	0	0	0	0	0	0	0	0	0	0	0	0	0	0
PNAGLIMN(+.98)YCRNPDAVAAPYCY	806.361	0.02	60	10.4	6.17		Deamidation (NQ)	0	0	0	0	0	0	0	0	0	0	0	0	0	0	0	0	3510	0	0	0	6220	0	3890	0	0	0	0	0	0	0	0	0	0	0	0
PPLYRVQ(+.98)L	986.587	0.07	6.25	8.4	9.18		Deamidation (NQ)	0	897	537	0	0	525	0	0	0	494	874	0	0	0	0	0	195	0	0	0	385	206	495	270	0	731	335	0	77.5	1310	16.3	146	759	0	521
NWSSTSEG	434.193	0.02	60	8.6	4			0	0	0	0	0	0	0	0	1390	2140	0	0	0	0	0	0	0	0	0	0	0	0	0	0	0	0	0	0	0	0	0	0	0	0	0
GGCGL	406.181	0.01	60	10.1	5.52			0	0	1230	0	0	0	0	2300	0	0	0	0	0	0	0	0	0	0	0	0	0	0	0	0	0	0	0	0	0	0	0	1300	0	0	0
QGSLCQDHVN(+.98)PCESRPCQ(+.98)NGATCMAQ(+.98)PSGYLCQCAPGYDGQNCSKELD	1022.6	0.02	60	7.4	4.43		Deamidation (NQ)	0	3530	0	0	0	0	0	0	0	0	0	0	0	0	0	0	0	0	0	0	0	0	0	982	0	0	0	0	0	0	0	0	0	1060	0
E(-18.01)KALTASKGK	1014.6	0.06	5.34	5.4	9.71		Pyro-glu from E	0	0	0	0	173	0	0	0	362	440	0	0	0	0	0	1950	607	0	546	0	660	501	72	0	222	0	55.5	290	0	0	0	828	0	0	0
SYKMADEAGSEADHEGTHSTKRG	493.622	0.13	60	4	5.37	sp|P02671|FIBA_HUMAN		0	0	0	632	0	0	0	0	0	0	249	667	0	1990	0	0	0	0	0	0	639	0	0	0	0	1530	1540	0	0	0	0	792	411	0	0
GFTLRR	375.228	0.02	60	1.1	12			0	0	0	0	0	0	0	1020	0	0	0	0	0	2520	0	0	0	0	0	0	0	0	0	0	0	0	0	0	0	0	0	0	0	0	0
AEKLAKERQEAEEAKEALLQ	571.81	0.05	60	10.3	4.77			0	0	0	0	0	0	0	971	0	0	0	0	1590	0	981	0	0	0	0	0	0	0	0	0	0	0	1150	0	0	1400	0	0	0	0	0
SALHHALEESASLL	739.391	0.01	60	8.9	5.22			0	0	0	0	0	0	0	0	0	0	0	402	0	0	0	3150	0	0	0	0	0	0	0	0	0	4700	9830	0	0	832	6250	0	0	0	7630
LKGQ(+.98)KGAPAK	998.605	0.06	2.53	11.1	10.3		Deamidation (NQ)	0	0	712	871	299	406	0	0	341	317	0	0	0	93.6	0	135	0	401	163	0	195	293	121	0	0	195	0	0	0	0	0	0	151	308	0
FLLPGAPAV	884.522	0.02	2.32	12.6	5.52			1580	0	0	0	0	0	0	0	605	334	0	0	0	0	0	183	875	0	3440	0	0	0	753	0	0	0	0	0	0	704	0	0	5.59	0	0
RAVPPNNSNAAEDDLPTVELQG	1154.07	0.01	60	0	3.92			0	0	0	0	0	0	0	0	0	0	0	0	0	3590	0	0	0	0	0	0	0	0	0	0	0	0	0	0	0	0	0	0	0	0	0
EDGLRGWFPASYVQ(+.98)	813.39	0.01	60	10	4.37		Deamidation (NQ)	0	0	1240	0	0	0	0	1180	0	0	0	0	1170	0	0	0	0	0	0	0	1900	0	0	0	0	0	0	0	0	0	890	0	0	0	0
HTLGLPAGKAALAKAP	758.464	0.01	60	8.8	10			111	551	0	0	0	0	0	0	0	2930	0	0	0	0	0	0	0	0	0	0	0	0	0	0	0	0	0	0	0	0	414	0	0	0	903
AKKLEKAEARLKAKQ	856.522	0.02	60	8.5	10.17			0	1290	0	1450	0	0	0	0	0	0	475	384	0	0	0	0	0	0	0	0	0	0	2990	0	0	0	0	0	0	0	0	0	0	0	0
KNLDLTANLL	1114.65	0.01	60	11.1	5.84			0	0	0	0	0	273	3340	0	0	0	0	0	0	0	0	0	0	0	0	275	2570	243	555	0	0	217	21.1	0	0	0	14900	0	0	0	366
VLGSGLVAPV	911.558	0.06	1.37	9.3	5.49			242	0	0	0	522	242	0	734	43.9	418	0	215	0	914	0	0	0	296	69.7	98.2	0	0	1040	120	909	0	0	0	0	0	0	0	0	837	85.4
TQSLPP	642.345	0.14	60	6.1	5.19			0	0	0	0	0	0	0	0	0	1600	0	0	0	0	0	2030	0	0	0	0	0	0	0	0	0	0	0	0	0	0	0	0	0	0	0
RKRTLLAKK	557.384	0.02	60	8.5	12.02			0	0	0	0	0	0	0	1580	0	0	0	0	0	0	2050	0	0	0	0	869	0	2900	0	0	338	0	0	617	0	0	0	0	0	119	20100
RVVVTT	674.42	0.01	5.26	11.8	9.75			0	0	615	554	0	0	0	0	0	0	1350	536	0	0	0	0	577	0	0	0	0	0	0	699	0	0	0	0	0	0	0	0	0	0	203
HRRLHLRP	1084.66	0.08	2.17	7.8	12.3			0	0	625	110	190	0	0	0	693	847	0	494	0	0	238	436	0	0	1090	774	128	0	0	0	743	1080	302	126	104	0	160	1410	258	222	0
AHVVGPVHAVT	1086.64	0.05	1.36	8.7	6.96			0	0	0	822	360	0	88.6	0	0	1350	0	0	0	0	42.6	974	0	0	1380	155	152	315	994	965	0	430	1720	492	0	0	0	0	0	0	0
VLEEDEEVTEEAE	760.825	0.02	60	8.5	3.31			0	0	322	0	0	0	0	1590	0	0	0	0	0	0	1730	0	0	0	0	0	0	0	3050	0	0	1990	0	0	0	0	472	0	0	0	4870
KEN(+.98)KELVKRATIDIKTLVTLREDLVSEKLKTQ(+.98)Q	968.069	0.01	60	19.5	9.31		Deamidation (NQ)	0	0	0	0	0	0	0	0	0	0	0	0	0	0	3650	0	0	0	0	0	0	0	0	0	1400	0	0	0	0	0	0	0	0	0	0
GGSGSGGGGGGAGG	891.337	0.01	60	4.1	5.52			0	0	0	700	0	0	2960	0	0	0	0	0	0	0	0	0	0	0	0	0	0	0	0	0	0	0	0	0	0	0	0	0	0	0	0
GSSVSTMTSQYQ(+.98)EGDDSM(+15.99)GKKHS	1232.5	0.02	60	10.4	5.38	sp|Q8N7U7|TPRX1_HUMAN	Deamidation (NQ); Oxidation (M)	0	0	0	0	0	0	0	0	0	0	0	0	3660	0	0	0	0	0	773	0	0	768	0	0	0	0	0	0	0	0	0	0	0	0	0
GQ(+.98)PGAKGANGAPGIAGAPGFPGA	960.967	0.03	60	11.2	8.75		Deamidation (NQ)	0	0	0	0	0	0	0	0	0	0	0	0	0	0	2230	0	0	1440	0	0	0	0	0	0	0	0	0	0	0	0	0	1440	0	0	0
HGQPGPAGPPGF	559.782	0.01	60	9.3	6.74	sp|P25067|CO8A2_HUMAN		0	0	0	0	0	0	0	0	0	0	3670	0	0	0	0	0	0	0	0	0	0	0	0	0	0	0	0	0	0	0	0	0	0	2470	5040
LQKAIDLFTDAIKLNPRLAILYAKRASV	786.24	0.01	5.31	4	9.99			0	0	1240	0	0	0	249	0	0	0	0	0	1680	506	0	0	0	0	0	0	0	0	0	3250	837	0	0	0	0	0	0	0	0	0	0
Q(-17.03)LVVPSKAKAEKPPLS	558.995	0.02	60	4.7	9.7		Pyro-glu from Q	0	0	0	0	0	0	0	0	0	0	0	0	0	0	0	0	0	3690	0	0	2980	0	0	0	0	0	0	0	0	0	0	0	0	6070	0
STCGPNSI	389.685	0.07	60	2.6	5.24			0	0	0	0	0	0	0	0	0	3700	0	0	0	0	0	0	0	0	0	0	0	0	0	0	0	0	0	0	0	0	0	0	0	0	0
DGEFLTVDLNST	655.793	0.01	60	9.5	3.49			0	2550	0	0	0	1140	0	0	0	0	0	12.1	0	0	0	0	0	0	3400	830	0	1080	0	0	539	0	0	0	0	0	0	0	0	0	0
VINIAAGKRKLKELE	841.518	0.04	5.62	9.9	9.7			0	0	0	11.6	0	0	60.8	0	0	511	2240	0	236	0	431	219	0	0	909	0	14.5	0	192	0	0	1020	0	819	0	0	0	0	328	0	0
LN(+.98)LLYKLLAAL	623.398	0.03	60	11	8.59		Deamidation (NQ)	0	0	0	0	0	3710	0	0	0	0	0	0	0	0	0	0	0	0	392	0	0	0	0	0	0	14900	0	0	3590	0	742	0	0	0	1770
PSSDLQN(+.98)HVAAGSGQERSAGDPSQPRPN(+.98)P	986.785	0.01	60	3.8	5.39		Deamidation (NQ)	0	0	0	0	0	0	0	0	0	0	0	0	0	0	2540	0	1180	0	0	0	0	0	0	0	0	0	0	0	0	0	0	0	0	0	0
HQLLLAIY	970.598	0.08	1.26	7.1	6.74			165	0	628	0	0	0	569	325	500	327	0	0	771	212	0	223	0	0	0	0	0	170	666	611	317	836	0	0	289	72.5	0	1220	0	251	0
GRILQGGAK	899.546	0.08	5.22	10	11			0	0	537	507	0	301	323	0	0	103	0	0	0	0	0	0	779	1170	139	34.9	170	209	0	78.1	547	418	218	0	0	1910	50.4	0	0	0	1190
QGIGIPGRTGAQGPAGEPGIQ(+.98)GPR	568.789	0.05	60	4.5	9.6		Deamidation (NQ)	0	0	0	0	0	0	0	0	0	0	1470	0	0	0	0	0	2250	0	0	0	2380	0	4150	5620	0	0	0	0	0	0	0	0	0	1980	0
RLLGLAGNA	884.543	0.13	2.98	9.8	9.75			0	0	0	375	260	293	0	452	0	181	129	1100	0	175	210	324	0	227	681	197	254	0	0	459	309	0	219	87.2	0	0	0	0	354	0	555
HGYGR	589.284	0.01	60	7.7	8.75			0	0	0	0	0	0	0	427	0	0	3300	0	0	0	0	0	0	0	0	0	0	0	0	0	0	0	0	0	0	0	0	0	0	0	0
Q(-17.03)AQLAKPDLT	534.287	0.01	60	0	5.84		Pyro-glu from Q	3740	0	0	0	0	0	0	0	0	0	0	0	0	0	0	0	0	0	0	0	0	0	0	0	0	0	0	0	0	0	0	0	0	0	0
THSLHQ(+.98)RGLAVPDGPLGLP	656.017	0.01	60	4.5	6.61		Deamidation (NQ)	0	0	0	0	0	0	0	0	0	0	3770	0	0	0	0	0	0	0	0	0	0	0	0	0	0	0	0	1240	0	0	0	0	0	0	0
AGLIVLVLAM	999.611	0.08	3.55	8	5.57			164	0	198	0	0	0	0	559	0	578	0	0	0	762	0	0	975	535	0	394	0	1190	0	799	491	0	255	23.5	94.3	199	0	0	554	0	86.6
RLARASRGV	985.604	0.07	60	7.1	12.3			0	79	765	2040	365	0	367	0	0	179	0	0	0	0	0	0	0	0	1030	207	588	513	116	254	0	196	186	203	0	0	254	0	149	0	0
LQPTHALSGDGEWSGASSDSEF	1139.5	0.04	60	13.7	3.91			0	0	0	0	0	0	0	0	0	0	0	0	2100	0	0	1700	0	0	1870	0	0	1250	0	0	0	0	0	0	0	0	0	0	0	0	0
CPGAGGT	562.228	0.01	60	0	5.52			0	0	0	0	0	0	0	0	0	0	0	0	0	0	3810	0	0	0	0	0	0	0	0	0	0	0	0	0	0	0	0	0	0	0	0
LAGGDARGKKL	1085.67	0.14	2.44	7.6	9.99			212	0	532	8.34	163	223	0	0	0	107	671	0	0	389	263	0	1260	0	266	184	336	0	238	419	648	325	644	70.2	446	0	473	0	593	396	0
MALLSNLAQGDALA	694.361	0.05	60	6.3	3.8			0	0	0	0	0	607	0	0	1430	0	0	0	1110	0	0	685	0	0	0	0	0	0	0	0	0	0	0	0	0	0	0	0	0	0	0
YATVLVDAN	483.248	0.02	60	5.6	3.8			0	1030	0	0	0	0	0	0	0	0	0	0	0	2250	553	0	0	0	0	0	0	0	0	0	0	0	0	0	0	0	0	0	0	0	0
IQAKNLKSKFEKIGQLSEKEIQKKIE	765.194	0.01	60	6.8	9.6			0	0	0	0	0	0	3840	0	0	0	0	0	0	0	0	0	0	0	0	0	0	0	0	0	0	1730	0	0	0	0	0	0	6640	0	0
GQQAM(+15.99)SLAILRVIRLVRVFRIFKLSRHSKG	1166.01	0.08	60	4.1	12.6		Oxidation (M)	0	0	0	0	0	0	0	0	2960	0	0	0	891	0	0	0	0	0	0	0	0	0	0	4710	0	0	0	0	0	0	0	0	0	9510	5210
KKESKKKTLKN	666.42	0.07	60	7.1	10.3			0	0	0	0	613	657	0	0	0	0	0	0	0	930	1450	0	209	0	1270	1520	975	706	804	627	0	1160	1240	380	1290	1040	731	0	1050	1420	1570
VNDN(+.98)EEGFFSARGHRPLDKK	580.039	0.04	60	2.9	6.73	sp|P02675|FIBB_HUMAN	Deamidation (NQ)	0	0	0	0	0	0	0	0	0	3860	0	0	0	0	0	0	0	0	0	0	0	0	0	0	0	0	0	0	0	0	0	0	0	0	0
RAFLS	593.347	0.06	60	4.7	9.75			0	0	0	0	0	0	0	1840	0	0	0	0	0	0	0	2020	0	0	0	0	3080	1420	0	2660	0	1970	0	1260	1640	0	891	0	0	0	0
LGAPVLLFLHPEDRPLMLAIHKKILQLAGQ(+.98)PFDHSP	803.461	0.02	60	4.2	7.03		Deamidation (NQ)	0	0	0	0	0	0	0	0	0	0	0	0	0	0	0	0	3870	0	0	0	0	0	0	0	0	0	0	0	0	0	0	0	0	0	0
RRLCDVQPFLPVLRLVAREGDRVKKLINSQISLLIGK	1061.65	0.02	60	3.2	10.89			0	0	0	0	0	0	0	586	0	0	0	0	0	0	1610	0	0	1680	0	0	0	0	0	0	0	0	0	0	0	0	0	0	0	0	0
E(-18.01)GPLSRVKSLKKSLRQSFRRIRKSRVSGK	842.273	0.01	60	6.5	12.31		Pyro-glu from E	0	0	0	0	618	0	0	0	0	3260	0	0	0	0	0	0	0	0	0	0	1780	0	0	1050	0	882	0	0	0	0	0	478	0	0	2700
LENGANQ(+.98)NVATEDGFTPLAVALQ(+.98)Q(+.98)GHE	707.324	0.11	60	4.6	4		Deamidation (NQ)	0	0	0	0	0	0	1610	0	0	0	0	0	0	0	0	0	0	2280	0	1690	0	0	0	0	0	0	0	0	0	0	0	0	0	0	0
EAYQ(+.98)RGAAPK	546.264	0.01	60	13	8.69		Deamidation (NQ)	0	0	0	0	0	0	0	0	0	2740	0	0	0	0	1150	0	0	0	0	0	0	0	0	0	0	0	0	0	0	0	0	6320	0	0	2290
KVEQAVETEPEPEL	533.268	0.01	60	2	3.98			0	0	0	0	0	0	0	2650	0	0	1250	0	0	0	0	0	0	0	0	0	1940	0	0	4950	0	0	0	0	0	0	0	0	0	0	0
L(+42.01)LLPGPPP	845.525	0.06	5.38	6.5	5.52		Acetylation (Protein N-term)	0	0	1200	0	0	0	372	0	591	0	0	1390	303	0	0	0	0	53.8	644	0	0	0	1340	372	0	0	0	0	0	125	281	0	201	0	0
PPAVV	482.284	0.05	1.42	8.1	5.96			0	0	882	226	293	0	798	0	0	492	0	0	0	0	0	604	626	0	0	0	0	717	0	0	0	0	0	300	0	357	0	0	230	0	495
TAVNGVKDPD	508.257	0.01	60	10.6	4.21			0	0	0	0	1150	0	0	0	0	0	0	0	0	0	2790	0	0	0	0	0	0	0	941	1280	0	0	0	0	0	1450	0	0	0	501	8840
KIRVPGN	783.469	0.05	5.96	9.7	11			358	0	0	0	554	0	0	1160	0	206	0	1520	0	0	147	0	0	0	1470	1970	458	0	0	0	0	0	2030	0	717	0	0	0	0	0	0
QSQDAHQ(+.98)MTMDDSENN(+.98)FQ(+.98)NITE	862.655	0.02	60	10.5	3.77		Deamidation (NQ)	0	0	3950	0	0	0	0	0	0	0	0	0	0	0	0	0	0	0	0	0	0	0	0	0	0	0	3480	1010	8070	0	0	0	0	0	0
V(+42.01)PPAT	526.283	0.04	60	8.4	5.49		Acetylation (Protein N-term)	0	0	0	0	0	1080	0	0	0	0	0	0	0	0	0	1530	1350	0	0	0	0	0	0	0	1630	0	0	1040	0	0	0	0	0	0	0
HGEYDT	721.258	0.03	60	9.5	4.35			0	0	0	0	0	0	0	0	1140	0	2070	0	762	0	0	0	0	0	0	0	0	0	0	0	0	0	0	0	0	0	0	0	0	0	0
GPELQRTGR	507.275	0.01	60	20.1	9.6			0	0	0	0	0	0	0	0	0	0	0	0	0	0	0	0	3980	0	0	0	0	0	0	0	0	0	0	0	0	0	0	0	0	0	0
E(-18.01)ICLLAGAASDCDCKN(+.98)DVNCNCYSGDDAYA	1033.72	0.01	60	2.1	3.61		Pyro-glu from E; Deamidation (NQ)	2200	0	0	0	936	852	0	0	0	0	0	0	0	0	0	0	0	0	0	0	0	0	0	0	0	0	0	0	0	0	0	0	0	0	0
SSSSASSSSSSSSSASSGPA	846.351	0.03	60	2.6	5.24			0	0	0	0	0	0	0	0	0	0	2040	0	0	0	0	0	0	1950	0	0	0	0	0	0	0	0	0	0	0	0	0	0	0	0	0
AAQFGLVGAAGLGGLGV	729.402	0.02	60	1.3	5.57			0	0	0	0	0	0	0	0	0	0	1450	0	0	0	0	0	0	2550	0	0	0	0	0	0	0	0	0	0	0	0	0	0	0	0	0
GGHDG	442.168	0.03	2.07	3.6	5.08			0	0	823	0	0	0	0	806	0	0	0	0	749	0	444	0	0	1200	477	0	0	0	0	0	0	0	488	488	0	0	0	0	450	0	0
AYGMVGPLAQDPQS	478.56	0.01	60	8.2	3.8			0	0	0	0	0	0	1290	0	0	0	0	0	1240	0	0	0	1510	0	0	0	0	0	0	0	0	0	0	0	0	0	0	0	0	0	0
ICGDADSASTVLDGTE	777.343	0.01	60	8	3.37			0	0	1160	0	0	649	1530	0	0	0	704	0	0	0	0	0	0	0	0	0	0	0	0	0	0	0	0	0	0	0	0	0	0	0	0
ESGSGPTTSFGQ(+.98)HVSGSDNFSSSGQHISDSGQ	1057.1	0.01	60	4.6	4.52		Deamidation (NQ)	0	0	1030	2170	0	0	0	850	0	0	0	0	0	0	0	0	0	0	0	0	0	0	0	0	0	0	0	0	0	0	0	0	0	0	0
EGIVM(+15.99)AADS	908.402	0.01	60	7.3	3.67		Oxidation (M)	2270	0	1780	0	0	0	0	0	0	0	0	0	0	0	0	0	0	0	0	0	0	0	0	0	0	0	0	0	0	0	0	0	0	0	0
LVEGEIAEEAAEKATS	823.905	0.04	60	3.4	3.98			0	0	0	0	0	0	0	0	0	0	0	0	1710	0	2340	0	0	0	0	0	3270	0	0	0	0	3680	5890	2530	1460	4650	1590	0	0	0	6860
AGGGGGSM(+15.99)GG	723.276	0.01	60	0	5.57		Oxidation (M)	0	0	0	0	0	0	0	0	0	0	0	0	0	0	0	0	0	4060	0	0	0	0	0	0	0	0	0	0	0	0	0	0	0	0	2880
PPASSPAPAPKFSPVTPKFTPVAS	793.429	0.01	60	2.7	10.02	sp|Q15942|ZYX_HUMAN		0	0	0	0	0	0	0	0	0	0	0	0	0	4070	0	0	0	0	384	0	0	0	0	0	0	0	0	0	0	0	0	0	0	0	0
SATAQRV	732.381	0.03	60	18.2	9.47	sp|Q96HA7|TONSL_HUMAN		0	0	0	0	0	0	0	0	0	0	0	0	0	4070	0	0	0	0	0	0	0	0	0	0	0	0	0	0	1180	0	0	0	0	0	0
GPPGSAGPPGSPGP	566.276	0.02	60	5.4	5.52	sp|P05997|CO5A2_HUMAN		0	0	0	0	0	0	0	2850	0	0	1240	0	0	0	0	0	0	0	0	0	0	0	0	0	0	0	0	0	0	0	0	0	0	0	0
HAGQDCDNT	960.343	0.02	60	5.2	4.2			0	0	0	0	0	0	0	0	0	0	0	1360	0	0	0	1510	0	1230	0	0	0	0	0	0	0	2800	0	0	0	0	0	0	0	2440	0
PPDVPDHAAYHPF	488.229	0.03	60	2.8	5.05			0	0	0	0	0	0	0	0	0	0	4110	0	0	0	0	0	0	0	0	0	721	0	0	0	0	0	0	0	0	0	0	0	0	979	0
EEQGLVKN(+.98)TEQSRRKKRKKISGPN(+.98)PLSCLKKKK	960.334	0.01	60	8.5	10.53		Deamidation (NQ)	0	0	0	0	0	0	0	0	0	0	0	0	0	0	1820	0	0	2290	0	0	0	0	0	0	0	0	0	3080	445	0	0	0	0	0	0
ACSGGAPGAG	747.305	0.01	60	0.6	5.56			0	0	0	0	0	0	0	0	0	0	0	4110	0	0	0	0	0	0	0	0	0	0	0	0	0	0	0	0	0	0	0	0	0	0	4310
LSGDH	528.238	0.02	60	8	5.08			1350	0	0	0	0	0	118	0	0	2290	0	0	0	265	0	0	96.8	0	0	0	269	0	216	129	521	0	0	0	0	0	0	0	0	392	0
RLFVVIVM	976.593	0.07	2.99	8	9.75			141	0	269	0	270	180	297	0	0	238	0	0	1380	0	0	503	848	0	0	97.8	0	0	0	228	434	236	81.5	152	436	0	0	0	76.1	1530	0
KLQ(+.98)AILKPM	1042.64	0.05	2.92	6.4	10		Deamidation (NQ)	465	0	1370	0	697	268	0	785	0	0	0	0	0	0	314	235	0	0	92.9	35.8	409	0	438	0	69	0	0	0	0	0	0	0	682	0	0
SSGKKK	634.378	0.06	60	7.3	10.3			0	0	0	0	0	0	0	0	0	0	0	0	0	0	4140	0	0	0	0	0	0	0	0	0	0	0	0	0	0	0	0	0	0	0	0
NRQAGAAGSRMNFRPGVLSS	519.769	0.02	60	15.1	12.3			0	0	0	0	0	0	0	0	0	0	1660	0	2480	0	0	0	0	0	0	0	0	0	0	0	0	0	0	0	0	0	0	0	0	0	0
NFRPGVLSSRQLGLPGPPDVPDHAA	650.092	0.01	60	0	6.75			0	0	0	0	0	0	4140	0	0	0	0	0	0	0	0	0	0	0	0	0	0	0	0	0	0	0	0	0	0	0	0	0	0	0	0
GMPIQGQPCFCKYAQGADSVEPMFRHLKN(+.98)TYSGLQ(+.98)L	1004.96	0.02	60	10.5	8.03		Deamidation (NQ)	0	4140	0	0	0	0	0	0	0	0	0	0	0	0	0	0	0	0	0	0	0	0	0	0	0	0	0	0	0	0	0	0	0	0	3150
LLSVLLYAT	496.814	0.05	60	5.1	5.52			0	0	0	0	0	0	1850	0	0	0	0	0	0	0	2290	0	0	0	5650	1970	0	1190	0	3130	0	0	0	0	2760	5580	0	0	2660	0	0
VGTAWTADSGEGDFLAEGGGVR	1076.52	0.01	60	7.7	3.92	sp|P02671|FIBA_HUMAN		0	0	0	3040	0	0	0	0	0	0	0	0	0	1110	0	0	0	0	0	0	0	0	0	0	0	0	0	0	0	0	0	0	0	0	0
GEIIQ(+.98)M(+15.99)N(+.98)SKMSLIFEPADL	1077.53	0.01	60	13.8	4.14		Deamidation (NQ); Oxidation (M)	0	0	0	0	0	0	0	0	0	0	0	0	4150	0	0	0	0	0	0	0	0	0	0	0	0	0	0	0	0	1100	0	0	0	0	0
TQHVNISQ(+.98)ADMQ(+.98)AIGNTITM(+15.99)VT	598.53	0.01	60	4.1	5.05		Deamidation (NQ); Oxidation (M)	0	0	0	0	0	0	0	0	0	0	0	0	0	0	0	0	0	4150	0	0	7000	0	0	0	0	0	0	0	0	0	0	0	0	0	0
KNCSN	565.24	0.04	60	8.2	8.22			981	0	0	0	0	0	0	962	0	0	0	0	0	1980	0	244	0	0	0	0	0	0	0	267	0	0	0	0	0	0	0	900	0	779	0
TKPNK	587.356	0.04	2.43	6.9	10			530	0	0	0	0	0	0	0	0	1620	0	0	0	2030	0	0	0	0	0	0	91.2	0	0	2030	0	0	731	846	0	0	0	0	0	0	0
SQVRYKEEFEKNKGKGFSVVADTPELQ	779.149	0.01	60	7.1	6.04			0	0	0	0	0	0	0	0	0	0	0	0	0	0	1910	2280	0	0	0	0	0	0	0	0	0	0	1710	902	1100	0	0	0	0	0	0
YTLALRRA	963.574	0.07	4.77	8.9	10.84			0	203	1000	0	993	0	0	0	0	589	808	0	0	32.8	568	0	0	0	3310	0	1770	1720	0	457	2770	0	348	0	0	0	0	0	6820	397	368
STSYNRGDSTFESKSYKM	522.74	0.01	60	0	8.16	sp|P02671|FIBA_HUMAN		0	0	0	0	0	0	0	0	0	0	0	0	0	0	0	0	0	4200	0	0	0	0	0	0	0	0	0	0	0	0	0	0	0	0	0
ATASGCGMGMSMPQ(+.98)MTAT	434.169	0.01	60	0	5.56		Deamidation (NQ)	0	0	0	0	0	0	0	0	0	0	0	0	4260	0	0	0	0	0	0	0	0	0	0	0	0	0	0	0	0	0	0	0	0	0	0
PASAGKLPAQVP	568.33	0.01	60	7.1	9.18	sp|O95714|HERC2_HUMAN		0	0	0	0	0	0	0	0	0	0	0	0	0	0	0	0	4260	0	0	0	0	0	0	0	0	0	0	0	0	0	0	0	0	546	0
E(-18.01)EFGGLVSANLILLRNRLLDILLKLIYT	796.229	0.02	60	9.2	6.28		Pyro-glu from E	0	0	0	0	0	0	0	0	0	0	0	3130	225	0	0	0	916	0	8250	0	0	328	0	0	0	243	0	0	638	0	16.2	0	0	0	0
DNN(+.98)FITVIEPS	625.291	0.01	60	6.9	3.67		Deamidation (NQ)	0	0	0	0	4.2	1780	0	0	0	0	2490	0	0	0	0	0	0	0	0	0	0	9460	0	700	0	0	0	0	0	0	0	0	0	0	0
RNVLPRT	855.513	0.05	5.66	8.6	12			696	0	0	0	1880	0	711	161	0	0	54.2	157	0	0	0	619	0	0	326	0	4910	0	2090	29.9	0	658	0	0	0	0	0	0	475	3010	0
SSSYYGNPQTPGGSCQ(+.98)KCDCN(+.98)PHGSVHGDCDRTSGQ(+.98)CV	787.713	0.01	60	2.8	5.93		Deamidation (NQ)	0	0	0	0	0	0	0	0	2660	0	0	1620	0	0	0	0	0	0	0	0	0	0	0	0	0	0	0	0	0	0	0	0	0	0	0
AKALLRCVR	1029.62	0.14	2.18	6.2	10.86			84.9	0	628	119	213	877	0	0	0	589	0	0	0	540	294	0	705	231	751	130	209	501	889	321	93.8	0	346	17.3	353	379	641	1190	0	0	326
MADEAGSEADHEGTHST	582.228	0.12	60	4.2	4.17	sp|P02671|FIBA_HUMAN		0	0	242	1150	388	661	0	0	0	0	0	433	0	1410	0	0	0	0	0	502	0	431	259	823	0	621	0	0	0	0	0	0	0	0	0
RLLSVKGTLQQFV	744.956	0.06	4.22	7.9	11			44.9	0	498	0	0	0	0	817	455	704	0	0	0	0	1780	0	0	0	0	0	3400	0	0	4290	0	0	2060	1320	1170	0	0	576	0	1480	0
Q(+.98)GAKFPIKWTAPEAALYGRFTIKSDVWS	792.918	0.01	60	10.2	9.53		Deamidation (NQ)	0	0	0	0	0	0	0	0	0	4300	0	0	0	0	0	0	0	0	0	0	0	0	0	0	0	0	0	0	0	0	0	0	0	0	0
KGTYTSSEESSTESSEEEDAPSFAPSSSV	1004.73	0.01	60	3.8	3.77			0	0	0	0	0	2710	0	0	0	0	0	0	0	1590	0	0	0	0	0	0	0	0	0	0	0	0	0	0	0	0	0	0	0	0	0
VTVQVVVVRKREGLLHS	960.087	0.03	5.5	11.2	10.83			0	0	300	806	1050	279	0	0	93.7	8.95	0	0	255	1510	0	0	0	0	0	965	1100	0	746	0	0	9.68	0	0	144	0	0	0	0	441	0
IGVVAGIMTVILIILIVVMARYCRSKNK	769.231	0.01	5.36	11.1	10.31			0	0	189	1380	321	0	0	1900	0	0	0	0	0	522	0	0	0	0	0	0	0	0	0	0	0	0	0	0	0	0	0	0	188	0	0
QILSYLRQ(+.98)GTRNKKLKKKDKGKLEEKKP	1119.32	0.01	60	14.5	10.36		Deamidation (NQ)	0	0	0	0	0	0	1060	0	1030	0	0	0	0	0	2230	0	0	0	0	0	0	8260	0	0	0	0	0	0	0	0	0	0	0	0	0
LSKKRKFPK	566.375	0.09	60	4	11.33			547	0	0	0	1030	0	0	0	0	0	0	0	0	1700	0	1050	0	0	2450	0	2190	0	2530	1570	0	0	0	1170	0	1960	0	0	1190	1420	1100
MGPPGLAGPPGESGREGAPGAEGSPGRDGSPGAKGDRG	1148.21	0.03	60	9	4.94			0	0	0	0	0	0	0	0	0	0	0	0	0	0	0	0	0	4330	0	0	0	0	0	5390	0	0	0	0	0	0	0	0	0	0	0
PKAVLQAVGQL	1123.67	0.04	5.42	8.3	9.18			0	0	624	3250	0	123	94.9	0	0	0	0	0	0	0	0	249	0	0	0	127	314	43.6	0	0	1510	0	0	411	0	1110	60.1	223	150	0	262
HKN(+.98)KGKKN(+.98)GK	1140.64	0.01	60	0	10.6		Deamidation (NQ)	0	0	0	0	0	0	0	0	0	0	4350	0	0	0	0	0	0	0	0	0	0	0	0	0	0	0	0	0	0	0	0	0	0	0	0
TSYLETFREQ(+.98)VVN(+.98)ET	606.624	0.06	60	4	4.25		Deamidation (NQ)	0	0	564	0	0	0	0	0	0	0	1540	0	1250	0	0	0	997	0	8500	720	0	813	484	2350	0	0	1320	0	406	0	0	1210	1010	2040	0
YSKQFTSSTSYNRGDSTFESKS	627.533	0.02	60	9.6	8.43	sp|P02671|FIBA_HUMAN		1290	0	0	0	0	0	0	0	0	0	0	0	0	0	0	0	0	3070	7770	0	0	2430	0	0	0	0	0	0	0	0	0	3170	0	0	0
SKTKIVTLDVAAKILIE	921.566	0.01	60	9.5	8.22			0	0	0	594	0	0	0	0	2950	0	820	0	0	0	0	0	0	0	706	57.8	771	0	0	0	850	0	405	0	0	0	0	0	0	0	0
Q(-17.03)PPTVVPGGDLAKVQRA	858.471	0.01	60	8.7	8.75	sp|P68366|TBA4A_HUMAN	Pyro-glu from Q	0	0	0	0	0	469	0	0	0	0	0	0	0	0	3900	0	0	0	0	0	0	9520	0	0	0	0	0	0	0	0	0	3840	0	0	13100
ASHSHAFATV	514.261	0.09	60	4.6	6.96			1820	0	0	0	0	0	0	0	0	2550	0	0	0	0	0	0	0	0	0	0	0	0	0	0	0	0	0	0	0	0	0	0	0	0	0
PGKKGTRGKKGPPGSIVKKGLPGLKGLPGNPGLV	823.245	0.02	60	9.1	11.47			0	0	0	0	0	0	0	0	0	0	0	0	0	1190	0	0	0	3180	1510	0	1800	0	970	0	0	0	0	0	0	0	0	0	314	0	0
IFKAMLPLFHIALLVLFM(+15.99)VIIYAIIGLELF	1160.04	0.01	60	13.1	6.75		Oxidation (M)	0	0	0	1110	0	0	2590	0	0	0	0	0	0	0	674	0	0	0	0	1200	0	900	0	0	4480	0	2020	1650	2370	0	0	0	0	0	0
E(-18.01)N(+.98)IEAGRGQVLVPRVLALLTKLVAELKGCP	793.223	0.02	4.49	9.9	8.29		Pyro-glu from E; Deamidation (NQ)	0	2160	0	0	0	0	0	0	967	0	398	0	203	0	648	0	0	0	0	3120	0	2330	0	0	0	0	0	0	0	389	0	0	0	0	0
DQKEDSQSRQ(+.98)GGYSMHQLQG	1140.5	0.03	60	19.5	5.38		Deamidation (NQ)	0	3480	0	0	0	0	0	0	0	0	0	0	902	0	0	0	0	0	0	0	0	0	0	0	0	0	0	0	0	1810	0	0	0	0	0
M(+15.99)GSYQQNSM(+15.99)GSYGPQ(+.98)GGQ	955.387	0.01	60	9.8	5.27		Oxidation (M); Deamidation (NQ)	4150	0	0	0	0	0	0	0	0	0	0	0	0	0	0	242	0	0	0	0	0	0	0	0	0	0	0	0	0	0	0	0	0	1130	0
ESVGTNADT	893.379	0.01	60	4.8	3.67			0	0	0	0	582	0	0	0	0	0	0	0	0	0	0	0	0	3810	0	599	0	0	0	0	0	0	1370	301	0	0	0	3350	0	0	0
KSSMCSAPSSSSSAKGGGAPWPGGAQTYSPS	972.425	0.02	60	1.6	9.2			0	0	0	1580	0	361	0	0	0	0	0	0	0	0	0	2460	0	0	0	0	0	0	0	0	0	0	0	0	0	0	0	0	0	0	0
PAAGF	462.231	0.17	60	2.8	5.96			0	0	0	0	0	0	0	0	0	1330	0	0	0	0	0	0	1540	1540	0	0	0	0	0	1590	0	0	0	0	0	0	0	651	0	0	1370
Q(-17.03)SSSYSP	738.295	0.01	60	0	5.52		Pyro-glu from Q	0	0	0	0	0	0	0	0	0	4420	0	0	0	0	0	0	0	0	0	0	0	0	0	0	0	0	0	0	0	0	0	0	0	0	0
HINLKLTT	939.578	0.08	2.51	7.9	8.76			0	643	0	92.9	102	461	0	0	0	924	0	310	680	321	0	0	889	0	65	4200	0	1140	666	639	396	4110	253	23.5	0	83.5	0	1320	532	0	421
NRGDSTFESKSYKM(+15.99)ADEAGSEADHEGTHST	652.884	0.01	60	14.3	4.69	sp|P02671|FIBA_HUMAN	Oxidation (M)	0	0	0	0	0	0	0	0	0	0	0	0	0	0	0	0	4430	0	0	0	5060	0	0	0	0	0	0	0	0	0	0	0	0	0	0
RQRRRRLLIKKM(+15.99)PAAATIPA	788.152	0.04	60	6.8	12.6		Oxidation (M)	0	0	0	0	0	0	0	0	1260	388	0	507	0	243	0	0	68	1970	166	0	0	0	0	2290	942	0	0	0	155	244	0	0	1270	514	0
KEKVLLRRKSELP	798.514	0.01	60	7.8	10.28			0	0	0	1860	1780	797	0	0	0	0	0	0	0	0	0	0	0	0	0	0	0	0	2480	0	0	0	0	0	0	0	0	6080	254	0	0
HILLHLTSLGVLFRGQQ	966.577	0.05	3.37	10.2	9.76			0	311	0	712	0	445	0	0	0	369	536	0	0	28.6	437	41.1	1250	310	4970	0	1980	0	2160	0	2120	0	742	1850	0	0	0	0	0	684	867
LEKKLAIL	464.328	0.02	60	5.4	8.59			0	0	0	0	0	0	0	1690	0	0	0	0	2750	0	0	0	0	0	0	0	0	0	0	0	0	2270	0	0	0	0	841	0	0	0	0
GQEAQ(+.98)DEDSSDSEADEQSISQDPKDTPSQ(+.98)PSSTSHRPRAASCRATAAWCTD	1088.45	0.02	60	13	4.14		Deamidation (NQ)	0	0	0	0	0	0	0	1780	0	0	2660	0	0	0	0	0	0	0	0	0	0	0	0	3350	0	985	0	0	0	0	4080	0	0	0	0
CDRWMHAVCQNLNTEEEVENVADI	564.456	0.04	60	4.1	4.08			0	0	0	0	0	0	0	4450	0	0	0	0	0	0	0	0	0	0	0	0	3550	0	4840	4810	0	0	932	0	0	0	0	2900	0	0	5610
MPSPKVSDTVVEPYN	554.939	0.02	60	4.4	4.37			0	0	0	0	0	0	0	1880	0	0	0	0	0	2580	0	0	0	0	0	0	0	0	0	0	0	0	0	0	0	0	445	0	0	0	4820
QTQETVKPVILLIPQKRTPTGV	816.146	0.01	60	7.5	9.99			0	0	0	2950	0	0	0	0	0	0	0	0	0	0	0	0	1510	0	0	0	0	0	0	4260	0	0	2790	0	1110	0	0	0	0	4080	0
E(-18.01)LALITQAV	939.542	0.03	4.65	8.6	4		Pyro-glu from E	349	0	0	0	0	0	0	0	0	56.5	0	267	1490	0	0	1170	1140	0	0	1300	0	318	0	0	0	0	0	0	0	0	0	0	1000	0	0
LALILPLLF	506.841	0.03	60	10.2	5.52			2080	0	0	639	0	0	0	0	0	0	0	0	0	0	1760	0	0	0	0	8910	0	3910	0	0	0	0	516	0	0	0	0	3780	0	0	0
RN(+.98)PVEELTVDSPPVQ(+.98)QISQLLSLLHQ(+.98)GQ	1043.54	0.01	60	0	4.65		Deamidation (NQ)	0	0	0	0	0	0	0	0	0	0	0	0	0	0	0	0	0	4480	0	0	0	0	0	0	0	0	0	0	0	0	0	0	0	0	0
LLGAVALVHGVGLLATDL	866.528	0.02	3.71	7.7	5.08			270	0	516	0	0	0	0	1420	0	0	0	0	0	938	0	0	0	1340	0	0	0	951	0	0	0	0	0	0	0	0	0	0	0	0	0
EEAAVAIKA	451.255	0.03	60	9.6	4.53			0	0	0	0	0	0	0	0	0	0	589	0	3900	0	0	0	0	0	0	0	0	0	0	0	0	0	0	0	0	0	0	0	616	0	0
EMPDFDVARISPWLLRVELDRKHMTDRKLTM(+15.99)EQIAEKINA	1203.66	0.03	60	5.9	5.66		Oxidation (M)	0	0	0	0	0	0	0	0	0	0	0	0	0	0	0	4490	0	0	0	4140	0	0	0	0	0	0	4290	0	0	0	0	0	2680	0	0
ESKSYKMADEAGSEADHEGTHSTKRGHAKSRPV	717.542	0.08	60	8	7.12	sp|P02671|FIBA_HUMAN		0	0	0	0	0	0	0	0	0	0	0	0	1990	0	0	0	0	2500	0	0	1560	0	3610	3100	0	0	0	0	0	0	0	0	0	4360	0
TRGAEQ(+.98)LAEGGR	623.319	0.11	60	7	5.81		Deamidation (NQ)	0	0	0	0	401	0	705	0	0	0	0	634	1740	0	0	0	1020	0	1600	0	0	0	0	0	0	0	0	534	717	1330	0	422	0	0	0
KPEGPPPQ(+.98)EGNKSRSARSPPGKPQ	843.071	0.01	60	13.4	10.28		Deamidation (NQ)	0	0	4500	0	0	0	0	0	0	0	0	0	0	0	0	0	0	0	0	0	0	0	0	0	0	3880	0	0	0	0	0	4460	0	0	2750
CEARNVFGKVQAEARLIVTGHAPPQ(+.98)IASSAPT	830.67	0.01	60	2.4	8.23		Deamidation (NQ)	0	0	0	0	0	0	0	0	0	4510	0	0	0	0	0	0	0	0	0	0	0	0	0	0	0	0	0	3860	0	0	0	0	0	0	0
E(-18.01)ICLHN(+.98)EFSCGNGECIPRAYVCDHDNDCQDGSDEHACN(+.98)YP	892.137	0.01	60	10.5	4.16		Pyro-glu from E; Deamidation (NQ)	0	0	0	0	0	0	2880	0	0	0	0	0	0	0	1630	0	0	0	2770	0	0	845	4340	0	0	304	0	0	0	0	0	0	5000	0	0
KPTKPAASDLPVPAEGVRNI	515.792	0.04	60	5.9	8.59			0	0	927	0	0	0	0	0	0	0	1320	0	0	0	0	0	2270	0	0	0	6970	0	9310	8780	0	1040	0	0	0	0	0	0	0	0	2890
GGDGDGD	592.183	0.03	60	6.8	3.42			0	0	0	0	0	0	0	0	0	0	0	0	4520	0	0	0	0	0	0	0	0	21600	0	0	0	0	0	0	0	0	0	0	0	0	0
TSAPAEGVRN	501.252	0.01	60	3.2	5.66			0	0	0	0	0	0	0	0	0	0	4520	0	0	0	0	0	0	0	0	0	0	0	0	82400	0	0	0	0	0	0	0	0	0	0	0
RAVPPNNSNAAEDDLPTVE	1004.98	0.01	60	3.9	3.92			0	0	0	0	0	0	0	0	0	0	0	0	0	2680	0	0	0	1850	0	0	0	0	0	2770	0	0	0	0	0	0	0	0	0	0	0
HQIRLLVT	979.6	0.11	2.25	9.7	9.76	sp|Q96P44|COLA1_HUMAN		494	118	469	231	356	0	147	0	686	1240	0	0	0	105	0	476	211	0	0	147	0	271	313	0	798	835	0	46.3	527	298	0	212	436	206	0
VKPVVFL	401.268	0.02	60	4	8.72			0	0	994	0	0	0	0	1990	0	0	0	0	1550	0	0	0	0	0	0	0	1080	0	0	1060	974	0	0	0	0	781	0	0	0	0	1660
YFKVSPKPK	547.333	0.05	60	8.7	10			0	0	0	0	0	0	899	0	0	0	0	0	0	0	2420	0	1220	0	0	1740	0	0	0	0	0	0	0	0	0	1610	0	0	1250	0	0
FM(+15.99)PGFAPLTSRGSQ(+.98)QYRALTVPELTQQMFDSKN(+.98)MMAA	834.385	0.01	60	13.1	8.59		Oxidation (M); Deamidation (NQ)	0	0	0	0	0	0	0	4540	0	0	0	0	0	0	0	0	0	0	0	0	0	0	0	0	0	2570	0	0	0	6620	0	0	0	0	0
Q(-17.03)IPAA	482.256	0.07	60	5.4	5.52		Pyro-glu from Q	0	0	0	0	0	0	0	0	0	270	0	0	0	3950	0	0	0	328	9040	0	0	0	0	0	0	0	0	0	863	0	0	0	0	4750	2710
SSTLSLT	708.389	0.01	60	19.1	5.24			0	0	0	0	0	0	0	0	0	0	0	0	4550	0	0	0	0	0	0	0	0	0	0	0	0	0	0	0	0	0	0	0	0	0	0
GKEIVRLQKDLRMLRKEHQ(+.98)QELEILKK	840.742	0.01	60	2	9.82		Deamidation (NQ)	0	0	0	0	0	0	0	4550	0	0	0	0	0	0	0	0	0	0	0	0	0	700	0	0	0	0	0	0	0	0	0	0	2430	0	0
KGTRGKKGPPGSIVKKGL	904.561	0.01	5.21	8.5	11.39			0	0	703	766	0	0	0	0	0	1930	0	817	0	0	0	0	338	0	0	0	0	0	0	0	0	0	0	0	0	0	0	0	0	0	3920
TILTKLKAK	508.351	0.02	60	8.3	10.3			0	0	203	1970	0	0	1990	0	0	0	0	0	0	0	0	0	413	0	2470	0	0	0	0	0	4410	0	2380	0	562	0	1840	0	2060	3910	0
HDKVLSIL	924.558	0.06	1.16	11.9	6.74			343	0	0	256	0	759	0	0	0	781	253	188	0	0	208	671	766	372	482	0	1030	36.7	0	0	0	0	120	0	22.2	0	0	436	0	0	674
LRGVRRN	870.533	0.13	1.65	9.3	12.3			0	259	169	228	0	498	413	231	279	0	0	803	253	498	0	284	476	207	1390	589	0	0	97.8	182	0	895	0	153	193	0	0	64.1	0	0	640
KRLYITT	894.544	0.05	4.63	10.1	9.99			0	0	0	485	390	0	0	0	0	318	0	0	131	0	0	336	657	2290	443	76.4	0	0	0	0	0	0	0	230	54.1	0	154	0	0	0	0
PRVPKYV	858.532	0.03	4.94	5.3	10.01			0	0	0	0	64.9	807	458	0	0	366	0	991	879	0	930	0	0	113	0	0	0	0	0	50	0	204	0	0	0	227	0	0	0	254	0
Q(-17.03)LGLPGPPDVPDHAAYHP	932.453	0.04	60	3.7	5.05		Pyro-glu from Q	0	0	0	0	0	0	4610	0	0	0	0	0	0	0	0	0	0	0	6600	2550	0	0	0	6600	0	8970	0	0	0	0	0	0	0	0	0
PKATPVAAAKTK	1182.71	0.06	5.5	9.4	10.31			0	977	1150	0	577	0	55	0	9.52	0	0	0	0	0	348	1500	0	0	0	29.6	1930	712	1490	1500	288	439	298	4530	2230	0	1090	0	717	0	364
RVAIGGQ	700.41	0.01	60	10.5	9.75			0	0	0	0	0	0	0	0	0	0	0	0	378	4240	0	0	0	0	0	2860	0	0	0	0	0	0	277	85.9	529	0	0	0	0	408	6190
KTERELLESYIDGR	570.299	0.01	60	2.3	4.87			0	0	0	0	0	1230	0	0	0	0	0	3390	0	0	0	0	0	0	0	0	0	0	0	0	0	2240	0	0	0	0	0	0	0	0	0
VKALGGLLGRQVLVFN(+.98)C	894.544	0.04	60	8.8	9.51		Deamidation (NQ)	0	0	1530	0	0	0	1040	835	0	0	0	1220	0	0	0	0	0	0	617	412	0	2010	260	0	0	0	545	0	0	227	0	0	0	0	1320
GSTGNRNPGSSGTGGTATWKPGSSGP	792.372	0.03	60	2.9	11	sp|P02671|FIBA_HUMAN		0	0	0	0	0	0	0	0	0	0	0	0	0	0	0	0	4630	0	0	0	0	0	4570	0	0	0	0	0	0	0	0	1680	0	0	0
HGVPIPVPP	912.534	0.04	60	8.3	6.74			0	0	0	0	0	0	0	2240	0	990	0	0	0	0	0	1400	0	0	0	1570	287	280	142	0	0	0	0	0	209	0	9100	0	1260	0	6080
EEAPSLRPAPPPISGGGYRARPA	587.31	0.02	60	5.7	8.84	sp|P02675|FIBB_HUMAN		0	0	0	0	0	0	0	0	0	0	686	0	1500	0	0	0	2460	0	0	0	1330	0	0	0	0	0	0	0	0	0	0	1810	0	0	0
TVPVALPIQQ	533.321	0.03	60	8.3	5.19			0	2110	0	0	0	0	0	0	0	0	0	0	0	490	2050	0	0	0	0	0	4910	397	1180	4540	0	4890	699	1420	0	0	559	1980	0	0	0
AGGSAVQ(+.98)RWPPSWGLPAMDSWPPEDPWQ(+.98)MMAA	878.635	0.01	60	7.3	4.03		Deamidation (NQ)	0	0	0	0	0	0	0	0	0	0	4670	0	0	0	0	0	0	0	0	0	0	0	0	0	0	0	0	0	0	0	0	0	0	0	1510
RVKGSTIVS	946.581	0.02	60	7.6	11			0	0	0	0	0	107	0	0	434	1140	0	0	0	0	76.5	603	2060	255	0	0	0	0	0	0	0	0	0	0	0	0	0	0	0	0	0
GNTVPARGGLPITQLFRI	955.576	0.03	2.04	8.9	12			916	0	0	0	0	0	441	0	0	1020	0	0	0	0	0	911	1390	0	344	767	1530	1040	0	2190	0	949	0	0	1090	1510	0	0	0	0	0
Q(-17.03)ARKIGNIT	983.58	0.05	3.19	7.8	11		Pyro-glu from Q	0	0	108	64.1	0	367	0	817	0	93.1	0	0	0	1710	0	838	0	688	0	318	196	119	0	0	0	0	0	845	271	42.9	73.4	0	0	0	0
GLPSLAPLVPPP	579.364	0.01	60	8	5.52			4690	0	0	0	0	0	0	0	0	0	0	0	0	0	0	0	0	0	0	0	0	0	0	0	0	0	0	0	0	0	0	0	0	0	0
SSRQLGLPGPPDVPDHAAYHPF	590.293	0.02	60	5	5.93			0	0	0	0	0	0	4690	0	0	0	0	0	0	0	0	0	0	0	0	0	10200	0	0	26100	0	0	0	0	0	0	0	0	0	0	0
LVRAMFSLL	1049.64	0.09	5.42	9.6	9.75	sp|P21817|RYR1_HUMAN		0	0	0	0	938	233	0	708	0	191	0	0	0	963	313	357	0	999	1400	737	650	553	0	0	315	156	202	236	193	0	1300	0	0	174	281
KLLYQALKN	1090.67	0.04	60	7.2	9.7			0	0	0	0	0	0	936	0	0	1820	0	0	0	0	0	98.1	1850	0	878	0	1450	0	65	0	1020	814	903	0	280	0	0	646	1130	0	59
SSLVKNAIQ	480.284	0.04	60	12.7	8.47			495	0	0	0	0	0	0	0	0	0	0	0	2420	0	0	1790	0	0	0	0	1220	0	0	2450	0	2340	0	0	0	1560	0	1660	0	2740	0
DLQRDEQKDASDFVAS	608.617	0.01	60	9.8	4.04			0	0	0	0	0	0	0	0	0	0	1890	0	0	0	0	0	1390	1440	0	0	0	0	0	0	0	0	0	0	0	0	0	0	0	0	0
LLRGQIQGVTPLAISVIPPPKFAVVFSPIQLSSL	897.274	0.01	60	6.8	11			0	0	0	0	0	0	1270	1150	0	0	0	0	0	2300	0	0	0	0	0	2650	0	0	0	0	0	0	0	0	0	0	0	0	0	0	0
EHATR	613.308	0.01	60	5.4	6.85			0	1960	0	0	0	0	2160	0	0	605	0	0	0	0	0	0	0	0	0	0	0	0	0	0	0	726	0	0	0	0	0	0	1570	0	0
HNERKEKLKQQLKGKEV	1046.63	0.03	4.83	12	9.82			0	0	0	0	259	329	963	0	0	0	0	2830	0	348	0	0	0	0	322	295	29.1	1340	1450	2620	1770	19.7	825	0	3690	0	550	0	0	0	0
AEAPP	484.23	0.12	60	4.5	4			0	1440	0	0	0	0	0	1240	0	2050	0	0	0	0	0	0	0	0	0	0	0	0	0	0	0	0	0	0	0	0	0	0	0	0	0
VFKFLQTKSL	1210.72	0.06	2.7	9.9	10			0	0	679	0	1580	99.4	503	0	0	0	0	0	0	122	682	1070	0	0	225	1600	933	478	208	663	147	239	228	0	1010	0	0	0	217	0	0
RN(+.98)LAQ(+.98)GRNV	515.27	0.03	60	3.8	12		Deamidation (NQ)	0	2150	0	0	0	0	0	0	1510	0	0	1080	0	0	0	0	0	0	0	0	0	577	0	0	0	0	0	0	0	0	0	0	0	0	0
PTPSAPPTSQQ	555.774	0.04	60	3.6	5.96			0	0	944	0	0	0	0	0	0	0	0	0	0	3800	0	0	0	0	0	0	0	0	0	0	0	2130	0	0	0	0	0	0	0	2860	0
SRGSYGGGDGGYN(+.98)GFGGDGGNYGGGPGYS	662.511	0.03	60	13.4	4.21		Deamidation (NQ)	0	0	0	1360	0	0	0	877	0	0	0	0	0	0	2520	0	0	0	4690	446	0	0	3160	0	1450	0	0	0	0	0	0	0	0	3730	0
AGPHCERCQENFYHWDPRMPCQPCDCQSAGSLHLQ(+.98)CDDTGTCA	962.993	0.01	4.71	8	4.83		Deamidation (NQ)	0	0	0	0	0	608	0	0	0	0	0	2090	0	0	0	0	2060	0	0	0	0	0	0	6490	0	0	0	0	2840	0	1230	3550	4230	0	3470
Q(-17.03)QTSSQM(+15.99)PASSTAPSSQETVQPTS	616.773	0.02	60	7.3	4		Pyro-glu from Q; Oxidation (M)	3010	0	0	1760	0	0	0	0	0	0	0	0	0	0	0	0	0	0	0	0	0	0	0	0	0	0	0	1070	0	0	0	0	0	0	0
PPVVKAQTT	940.549	0.03	5.37	8.8	9.18			768	0	0	0	0	46.7	0	0	0	99.4	0	0	2290	0	0	0	1570	0	850	0	0	0	107	0	0	0	0	155	129	186	0	0	0	0	890
LGRRDLLPTVRIVAGVAAATTTLLM(+15.99)VITGVAL	820.244	0.03	4.39	8.3	11.7		Oxidation (M)	0	521	420	1840	203	0	0	0	0	1180	0	0	612	0	0	0	0	0	0	0	0	0	0	1020	0	0	0	0	0	0	0	0	0	242	0
TAATGD	535.236	0.12	60	3.9	3.8			1280	0	0	649	0	0	0	0	1520	1330	0	0	0	0	0	0	0	0	0	0	0	0	0	0	0	0	0	290	0	0	0	0	0	0	0
TAADISLVHWRQQ(+.98)WLEN(+.98)GT	743.02	0.01	5.2	7.9	5.29		Deamidation (NQ)	0	0	0	0	1650	0	0	264	0	0	0	0	0	0	2880	0	0	0	0	0	0	0	0	0	0	388	0	1240	0	0	2240	0	0	5490	3210
HPRLLSV	821.491	0.01	60	11.3	9.76			0	0	0	0	0	0	0	0	0	0	0	330	4470	0	0	0	0	0	809	0	0	0	0	36.3	0	0	0	0	0	960	0	0	0	0	0
GAKGN(+.98)VGPPGEPGPPGQQGNHGSQGLPGPQ(+.98)G	567.268	0.09	60	5.1	6.75		Deamidation (NQ)	0	0	0	0	0	0	0	0	0	0	4800	0	0	0	0	0	0	0	4330	0	0	0	8850	4910	0	2180	0	0	0	0	0	0	0	13700	0
DPEVMQK	423.706	0.05	60	2.7	4.37			1530	0	0	0	3280	0	0	0	0	0	0	0	0	0	0	0	0	0	0	0	0	3920	0	0	2200	0	1820	0	0	0	0	0	0	0	3270
YRGQSGSCVDVNECLTPGVCAHGKCT	671.798	0.02	60	4	6.72			0	0	0	4810	0	0	0	0	0	0	0	0	0	0	0	0	0	0	12600	6620	0	0	0	0	0	1350	4230	0	0	0	0	0	0	0	0
GRGST	477.243	0.05	60	10.2	9.75			0	0	0	0	0	0	0	0	0	0	0	0	0	4820	0	0	0	0	0	0	0	0	0	2540	0	4100	864	0	0	0	0	0	0	0	0
ACNAECVM(+15.99)	856.29	0.04	60	7.7	4		Oxidation (M)	1860	2960	0	0	0	0	0	0	0	0	0	0	0	0	0	0	0	0	0	0	0	0	0	0	0	0	1640	0	0	6210	0	0	0	0	0
SSTRLEESEGTQ(+.98)PPSPS	895.394	0.02	60	7	4.25		Deamidation (NQ)	0	0	0	0	0	0	0	1950	2880	0	0	0	0	0	0	0	0	0	0	0	0	0	0	0	1080	0	513	755	0	976	0	2440	0	0	0
ITVPGRPVEV	1066.63	0.09	5.19	9.2	6			0	0	610	756	2070	41.4	0	0	0	440	0	0	0	0	0	685	0	229	915	197	697	246	2320	306	171	295	0	199	69.6	4130	0	154	370	272	504
TGGLGDPGQ(+.98)GTVALKKGEEGQSIVGKGLGTPKTTELKEAEPQ(+.98)GK	1088.33	0.02	60	5.1	6.03		Deamidation (NQ)	0	0	0	0	0	0	757	0	0	0	0	2690	0	1410	0	0	0	0	0	0	0	0	0	4640	0	3300	0	0	0	0	0	0	0	0	0
KPKTKSVLK	514.843	0.03	60	5.1	10.48			0	0	0	1710	0	0	2110	0	0	0	0	0	0	0	0	0	0	1040	427	0	0	3410	0	0	0	0	0	0	7600	0	0	0	1900	0	0
E(-18.01)NGVDGAPGPKGEPGHRGTDGAAGP	761.369	0.01	60	4.1	4.75		Pyro-glu from E	0	0	0	0	0	0	0	0	0	0	0	0	0	0	4870	0	0	0	0	2010	0	0	0	0	0	2710	1310	0	1680	0	0	0	0	0	0
IPLDLLLAVPVP	630.395	0.07	60	4	3.8			0	0	0	0	0	0	0	0	0	0	0	0	0	0	0	4870	0	0	5670	0	5230	0	0	0	0	0	3290	3160	5280	0	3920	0	4490	5160	3520
E(-18.01)LMIVGRVFVLLLVLVSILWIPVVQ(+.98)ASQGGQL	869.034	0.02	60	10.2	6.1		Pyro-glu from E; Deamidation (NQ)	2300	0	0	261	0	0	0	0	0	0	0	0	457	139	0	697	1050	0	580	0	0	0	835	0	0	2070	0	33.4	0	0	528	0	609	0	0
RLQYRKK	991.61	0.09	4.03	8.3	11.1			0	0	158	0	0	386	259	659	2150	323	451	0	0	0	30.3	241	66.1	190	0	0	474	130	0	346	0	122	662	0	81.3	0	445	0	0	369	366
HGIPGIKGKPG	1060.65	0.12	1.62	7.8	10			0	0	0	816	335	664	87.3	0	438	654	0	433	1220	63.3	2.07	206	0	0	1020	353	54.2	136	745	915	142	0	457	0	499	246	303	185	1370	195	494
DMREANYIGSDKYFHA	479.969	0.01	60	0	5.38			0	0	0	0	0	0	0	0	0	0	0	0	0	1720	0	0	0	3200	0	0	0	0	0	0	0	0	0	0	0	0	0	0	0	0	0
KSKVR	617.417	0.02	60	9.5	11.17			0	0	0	0	0	0	0	0	0	0	0	0	0	4810	33.4	88.4	0	0	0	2370	0	0	235	194	0	69.7	84.2	0	2060	0	45	594	0	87.7	180
HTIIRQHL	1017.6	0.05	2.74	9.2	9.76			2620	0	0	0	166	582	451	0	0	408	0	0	0	0	330	378	0	0	0	400	0	157	130	189	86.9	0	271	0	468	0	0	0	0	251	0
VLVGKAAAT	415.255	0.02	60	8.6	8.72			0	0	1150	0	0	1820	0	0	0	0	0	0	0	286	0	0	1680	0	0	0	0	279	0	0	0	0	0	0	0	2010	0	0	0	0	0
AAPGQEPPEHM(+15.99)AELQ	810.878	0.02	60	13.8	4.24		Oxidation (M)	0	0	0	962	0	0	0	0	0	0	0	410	0	0	0	0	0	3570	0	0	0	0	0	0	0	0	0	0	0	0	0	0	0	0	0
LHPGVASIRSL	1149.69	0.09	4.39	7.8	9.76			1010	0	1300	530	221	156	306	0	0	380	0	0	0	0	1040	0	0	0	1050	374	430	974	1370	344	17.4	0	690	1180	1220	1300	351	2310	0	1020	4870
AGVPGVGGVPGVGG	540.298	0.02	60	4.4	5.57			1460	0	0	0	0	0	0	0	0	0	0	0	0	3490	0	0	0	0	17.4	0	0	0	0	0	0	0	1380	0	0	0	0	1140	0	0	2550
KKAKAAKPKKAP	633.421	0.03	60	3.4	10.7			0	0	0	0	0	0	0	0	0	0	0	0	0	0	4960	0	0	0	2660	6340	0	0	0	0	0	0	6250	0	0	0	0	0	1950	0	0
KVGVSSR	732.437	0.02	5.34	10.7	11			186	0	0	0	502	0	0	0	0	864	0	2380	0	0	0	586	0	444	0	0	0	0	0	0	0	0	0	0	384	0	0	0	0	0	0
E(-18.01)KAAATPKKTVPKK	739.962	0.01	60	5.2	10.18		Pyro-glu from E	0	0	0	0	613	0	0	0	0	0	0	0	0	0	0	0	4350	0	0	0	1730	0	0	0	498	0	0	0	6700	7330	0	0	0	0	0
HPGLIGLIGP	973.599	0.1	6.49	7.8	6.74			2330	0	0	539	406	742	0	565	207	46.9	0	99	0	0	0	0	36.2	0	765	42.2	344	116	0	298	483	441	0	206	65.1	0	199	0	280	533	0
TAPSGQNENERCGT	732.309	0.04	60	5.3	4.53			0	0	0	0	0	0	2080	0	0	0	0	0	0	866	0	0	0	2040	1400	0	0	0	0	0	1090	0	0	38	693	0	0	0	956	0	0
KRLLQLPQ	498.323	0.01	60	0.7	11			0	0	0	0	0	1540	0	0	0	0	0	0	0	0	3450	0	0	0	4170	0	0	0	0	0	0	0	0	0	0	0	0	0	0	0	0
SGNVSPGTRREYHTEKLVTSKGDKEL	578.502	0.03	60	0.8	8.18	sp|P02671|FIBA_HUMAN		0	0	0	2090	0	1180	0	0	0	0	0	0	1720	0	0	0	0	0	5410	0	0	0	0	0	0	0	0	0	0	0	0	0	0	0	0
HGSVTPQKNSNLLVIIVVTVGVITV	863.209	0.02	5.29	5.9	8.76			0	0	0	0	137	0	0	0	0	0	0	999	747	469	0	147	1740	753	0	0	0	0	0	0	0	0	0	0	0	0	0	259	0	1190	0
IM(+15.99)GIVAGLAVLVVLAVLGAVVT	1047.63	0.03	60	10.6	5.52		Oxidation (M)	0	0	0	868	808	0	776	0	0	0	0	2540	0	0	0	0	0	0	4580	370	1010	1610	0	0	390	0	1550	0	468	1900	0	0	0	1510	0
EELKARISASAEELRQ	610.657	0.02	60	1.8	4.95			0	0	0	0	0	0	0	0	0	0	0	0	0	0	0	5000	0	0	0	0	0	0	0	0	0	0	0	0	0	0	0	0	0	0	0
D(+42.01)DDIAALVVDNG	629.79	0.04	60	1.6	3.32		Acetylation (Protein N-term)	0	0	0	0	0	0	0	2330	0	0	0	0	0	2670	0	0	0	0	0	0	3400	0	0	2790	0	0	0	0	0	0	0	0	0	0	6180
KESQNTAEIISPPSPD	571.612	0.04	3.79	7.7	4.14			0	828	635	474	259	0	288	0	0	1690	0	0	0	0	0	829	0	0	0	293	695	0	0	0	0	0	0	313	334	962	0	0	0	0	0
HPGPRGVPGIVGAVGQIGNTGPKG	1111.64	0.01	60	0	11			0	0	0	0	0	0	0	5020	0	0	0	0	0	0	0	0	0	0	0	0	0	0	0	0	0	0	0	0	0	0	0	0	0	0	0
RPPIPVTIPSVGVVNPILASPPTLGLLEPKK	1067.29	0.01	60	11.4	9.99			0	0	0	0	3330	0	0	379	0	1330	0	0	0	0	0	0	0	0	1160	0	0	0	1060	0	80.2	0	1340	0	0	6680	1850	0	0	0	4420
RLPLAVALL	483.33	0.04	60	6.9	9.75			0	0	0	0	0	1490	2490	0	0	0	0	0	0	0	1070	0	0	0	265	4230	0	0	0	388	0	2370	973	689	0	0	0	0	0	0	0
MELERPGGNEITR	501.255	0.03	60	11.4	4.78	sp|P02671|FIBA_HUMAN		0	0	0	0	0	0	0	0	0	5060	0	0	0	0	0	0	0	0	0	0	0	0	0	0	0	0	0	0	0	0	0	0	0	0	0
KRRKREPPRAK	711.451	0.02	60	5	12.01			0	0	0	0	0	0	5060	0	0	0	0	0	0	0	0	0	0	0	0	5240	0	0	0	0	0	0	0	0	0	0	0	0	0	0	0
KRPFLEPKKHV	689.926	0.01	60	7	10.29			0	0	0	3220	0	0	0	731	0	0	0	0	0	0	0	1110	0	0	0	0	0	0	0	0	0	0	0	0	0	0	0	0	0	0	0
L(+42.01)LFGAAGLLLFISL	745.455	0.04	3.44	6.9	5.52		Acetylation (Protein N-term)	1420	965	985	0	0	0	0	28.1	0	0	198	300	217	561	390	0	0	0	0	0	0	0	0	0	0	0	1630	0	0	0	0	0	0	0	1150
KKPAGAAKK	449.796	0.01	60	8.2	10.48			0	0	0	0	0	0	0	2060	0	0	3020	0	0	0	0	0	0	0	0	0	0	0	0	0	1200	0	0	0	0	0	0	0	0	0	0
E(-18.01)GSDGDNEDDEDEG	732.723	0.01	60	2.3	3.13	sp|O94880|PHF14_HUMAN	Pyro-glu from E	0	0	0	0	0	0	0	0	0	0	0	0	0	0	0	751	0	4330	0	0	0	0	0	0	0	0	0	0	0	0	0	0	0	0	0
N(+.98)SWSCKFVAAGGLQ(+.98)Q	799.366	0.01	60	9	8.22		Deamidation (NQ)	0	0	0	0	0	0	1180	0	0	0	0	665	2660	0	0	583	0	0	0	0	0	0	0	0	977	295	0	0	0	0	0	1670	0	0	0
QSQSLRVDSFRAGPEGRGRSAFPRRRPTHYTVTVPDSCFPATKPP	1003.31	0.01	60	0	11.27			0	5100	0	0	0	0	0	0	0	0	0	0	0	0	0	0	0	0	0	0	0	0	0	0	0	0	0	0	0	0	0	0	0	0	0
Q(+.98)AGM(+15.99)CGDIFESVHSS	792.827	0.01	60	5.7	4.35		Deamidation (NQ); Oxidation (M)	0	0	0	0	0	1010	0	1380	0	0	0	0	0	0	0	0	0	2710	3720	0	0	0	0	0	0	0	0	0	0	5750	0	0	0	0	0
SSGSPLLSQLGQ	587.314	0.04	60	7.6	5.24			0	0	1970	0	0	0	0	0	1850	0	0	1290	0	0	0	0	0	0	0	0	0	0	0	0	0	0	0	0	0	0	0	0	0	0	0
DNEEGFFSARGHRPLDK	494.491	0.02	60	7.5	5.48	sp|P02675|FIBB_HUMAN		0	0	0	0	0	0	0	0	0	4810	0	0	0	0	0	0	0	318	0	0	0	0	0	0	0	0	0	0	0	0	0	0	0	0	0
KSESSTSAFST	566.256	0.03	60	1.6	6			0	0	0	0	0	1030	1170	2930	0	0	0	0	0	0	0	0	0	0	0	0	974	0	0	0	0	0	0	0	0	0	0	2100	0	5220	0
E(-18.01)ALIHPTGLSTGALVAILLCIVILLVTVVLFAALRRQRKK	859.119	0.01	60	5.6	10.92		Pyro-glu from E	0	0	0	0	0	0	2440	0	0	781	0	0	0	0	0	1910	0	0	974	1370	0	0	0	2300	0	0	0	0	2420	0	0	0	1250	2650	0
PPAAVAVA	695.413	0.03	60	4.6	5.96			0	0	0	0	0	0	5140	0	0	0	0	0	0	0	0	0	0	0	0	0	2960	0	0	0	0	0	0	0	0	0	0	3400	0	0	0
YTKVVKGL	907.556	0.04	5.38	7.6	9.7			0	0	57	0	0	0	0	0	0	246	0	3180	0	1430	0	0	229	0	639	119	254	235	0	0	479	0	0	0	163	0	0	0	0	112	0
LSSTQSPLVDSATQ(+.98)Q(+.98)AFQNLLLSVKYGRFQ(+.98)GQ	703.752	0.01	60	0	8.59		Deamidation (NQ)	0	0	0	0	0	0	0	0	0	0	0	0	0	0	5150	0	0	0	0	0	0	0	0	0	0	0	0	0	0	0	0	0	0	0	0
Q(-17.03)GSTEATLSPGSTTASSLGQQSTTFHSSPGDTET	1113.46	0.01	60	13.5	4.13		Pyro-glu from Q	0	0	0	0	0	0	0	0	0	0	0	5160	0	0	0	0	0	0	0	0	0	0	0	0	0	0	0	0	0	0	779	0	0	0	0
QILHPKK	863.536	0.06	4.51	7.5	10			0	0	387	0	0	0	0	488	0	1920	0	0	1060	0	0	443	870	0	0	0	175	0	11.6	719	45.7	0	0	0	215	75.3	332	0	0	0	139
QIMLEVSSSHDESKTC	598.621	0.06	60	3	4.65			0	0	0	0	0	0	0	0	0	0	0	0	1170	0	0	0	0	4000	0	0	0	0	0	0	0	0	0	0	0	0	0	0	0	0	0
NGVIKANLFI	1088.65	0.07	4.56	10.1	8.75			1940	0	1070	463	192	126	0	0	0	819	0	0	0	0	289	271	0	0	0	146	0	300	0	0	188	0	82.3	0	207	0	0	0	219	151	239
FPQLGGRPGPEGEGSLESQPPPLQ	1237.61	0.03	60	9.5	4.25			0	0	0	0	0	0	0	0	0	0	2360	0	0	0	0	0	2810	0	0	0	0	0	0	0	0	0	0	0	0	0	0	0	0	0	2660
LVRELMEEKKEEITG	601.986	0.04	60	12.4	4.65			0	0	0	0	0	0	0	1960	0	0	1180	0	2030	0	0	0	0	0	0	0	0	0	0	0	0	0	0	0	0	2660	0	3300	0	0	5250
NIVVILLLVALLGSMTVVTVKAV	789.163	0.03	5.5	6.3	8.75			0	0	221	0	672	0	0	0	0	107	0	0	3440	366	0	0	95.1	272	0	0	0	0	0	0	7320	2290	0	0	0	0	0	0	861	128	0
FPKSHSL	408.22	0.01	60	12.4	8.76			0	0	0	0	0	0	0	0	0	0	0	0	0	3800	14.6	0	0	1360	0	0	0	0	0	0	0	0	0	0	0	0	0	0	0	729	0
CDTNPVNGKAICTCPSGYTGPACSQDVDECSLGANPCEHAGK	1053.95	0.01	60	7	4.43			0	0	0	0	1950	0	0	0	0	0	0	0	0	0	3230	0	0	0	2790	0	0	0	0	0	0	0	2090	0	0	0	0	0	0	0	0
PGSQ(+.98)GAPGT	772.328	0.01	60	13.5	5.96	sp|P05997|CO5A2_HUMAN	Deamidation (NQ)	0	0	0	0	0	1260	0	0	0	450	0	0	0	3490	0	0	0	0	0	0	0	0	0	0	0	0	0	0	0	0	0	0	0	0	0
GSKPEDM(+15.99)LWFHR	759.845	0.02	60	5.4	6.75		Oxidation (M)	0	0	0	0	0	0	0	0	0	0	0	0	3260	0	0	0	1950	0	10600	0	0	0	0	0	0	0	0	0	0	0	1580	0	0	13500	0
TLKEVEELE	545.281	0.02	60	6.6	4.09	sp|Q15942|ZYX_HUMAN		0	1570	0	0	0	0	0	0	0	0	2130	0	0	0	0	0	0	1510	0	0	12300	0	19600	13600	0	0	0	0	0	0	0	0	0	5570	0
PPKTPN(+.98)GNHTGGNIARFSP	654.999	0.01	60	6.6	11.01		Deamidation (NQ)	0	0	0	0	0	0	0	0	0	0	0	1310	0	3910	0	0	0	0	0	0	7680	0	0	0	0	5340	2780	0	0	2190	0	0	0	0	0
IARRPIM	856.526	0.02	2.55	8.4	12			0	0	0	856	0	283	0	0	1360	188	0	0	0	1070	1470	0	0	0	0	0	896	304	0	0	0	284	0	0	0	0	159	0	0	0	0
KERELEEARKKLAQIRQQ	564.075	0.1	60	6.4	9.69			0	0	0	0	0	0	0	0	0	0	0	0	3780	1450	0	0	0	0	0	0	1350	0	3800	3890	0	0	0	1140	439	4350	0	0	1330	2070	5210
KGLQ(+.98)PPVVVLRNKIKPCLTIDSSPLSADLKK	672.596	0.02	60	7.9	9.87		Deamidation (NQ)	0	0	0	0	0	0	3150	2100	0	0	0	0	0	0	0	0	0	0	0	0	0	0	0	0	0	5150	0	0	0	0	0	0	0	0	0
QAGAAGSRMNFRPGVLSS	602.638	0.02	60	3.2	12			0	0	0	0	4160	0	1120	0	0	0	0	0	0	0	0	0	0	0	2940	1020	0	0	0	0	0	0	0	0	0	0	0	0	3080	1560	0
E(-18.01)LTLRKTT	943.581	0.06	5.38	8.2	8.85		Pyro-glu from E	0	0	257	0	362	582	0	1120	943	1270	524	0	0	0	111	117	0	0	1410	0	193	744	101	91.9	195	0	0	0	0	0	0	0	0	0	0
HKIGFVVV	898.54	0.04	5.23	9.3	8.76			0	2940	1250	0	0	0	0	0	364	35.4	0	0	0	171	0	237	289	0	1530	778	0	0	0	0	0	0	0	647	0	0	0	416	192	0	0
LKGLHVM(+15.99)V	912.551	0.13	6.09	10.5	8.76		Oxidation (M)	0	0	107	346	74.8	419	715	0	194	201	0	1800	403	235	0	629	163	0	190	148	624	779	575	0	104	0	11500	18.3	202	0	413	375	233	1000	16300
TAGAYMFPDTMLQAAGC	583.248	0.03	60	5.6	3.8			0	0	0	5290	0	0	0	0	0	0	0	0	0	0	0	0	0	0	0	0	0	0	0	7490	0	0	0	0	0	0	0	3020	0	4120	0
HTAGAK	584.321	0.06	60	9.3	8.76			0	0	923	0	0	4030	0	355	0	0	0	0	0	0	0	0	0	0	0	0	0	0	0	0	0	0	4210	1220	6060	4430	3260	3090	0	0	0
TALTGSRGSIGTESTVET	589.639	0.01	60	1.4	4.53			0	0	1580	3740	0	0	0	0	0	0	0	0	0	0	0	0	0	0	0	0	0	0	0	0	0	0	0	0	0	0	0	0	0	0	0
SKQVKAPSS	931.528	0.01	60	9.4	10			0	0	0	0	0	0	0	0	0	0	0	0	0	0	0	0	0	5320	0	0	0	0	0	0	0	0	0	0	0	0	0	0	0	0	0
Q(-17.03)LAQ(+.98)GGLAEVLLAAKEHRRPRETRVIAVLGKAGQ	905.768	0.01	60	2.4	10.83		Pyro-glu from Q; Deamidation (NQ)	0	0	0	0	0	0	5320	0	0	0	0	0	0	0	0	0	0	0	0	0	0	0	0	0	0	3160	0	0	0	0	0	0	0	0	0
N(+.98)QPSAVG	673.298	0.01	60	6.8	5.52		Deamidation (NQ)	0	0	2010	0	0	0	0	0	0	0	0	0	0	0	3310	0	0	0	2130	997	0	955	0	811	0	0	0	0	0	0	660	0	0	0	0
KKKQ(+.98)SKDRFGLEGDEESTM(+15.99)LEESVSPKKSTILQ	754.778	0.01	60	10.6	6.37		Deamidation (NQ); Oxidation (M)	1810	0	0	3510	0	0	0	0	0	0	0	0	0	0	0	0	0	0	0	0	0	0	0	0	73.3	6880	0	0	0	0	0	0	0	0	0
RTSKACFQ(+.98)VGTSEEM(+15.99)	564.245	0.01	60	8.1	6.14		Deamidation (NQ); Oxidation (M)	0	0	0	0	0	0	0	0	0	0	0	0	0	0	0	0	0	5320	0	0	0	0	0	5820	0	0	0	0	0	0	0	0	0	0	5130
KYN(+.98)KEQQLKKITAKQKHLQAILGGA	946.566	0.01	60	5.5	10.13		Deamidation (NQ)	0	0	0	0	0	0	0	0	888	0	2290	0	0	0	0	0	2160	0	0	0	0	0	0	0	0	0	0	1510	0	0	0	0	0	0	0
L(+42.01)GAAC	476.225	0.02	60	3.7	5.52		Acetylation (Protein N-term)	0	0	0	0	0	0	0	0	0	5340	0	0	0	0	0	0	0	0	0	0	0	0	0	0	0	0	0	0	0	0	0	0	0	0	0
QQASGLSSPGNNDSKQSASAVQVPVSVAM(+15.99)M(+15.99)SPQM(+15.99)LTPQQMQQILSPPQ	1012.11	0.01	60	0	5.84		Oxidation (M)	0	0	0	0	0	0	0	0	0	0	0	0	5350	0	0	0	0	0	0	0	0	0	0	0	0	0	0	0	0	0	0	0	0	0	0
E(-18.01)TQPGLLVASVLGLQ(+.98)KNN	622.016	0.06	60	5.5	6.1		Pyro-glu from E; Deamidation (NQ)	0	0	0	0	0	0	0	5350	0	0	0	0	0	0	0	0	0	0	0	0	0	0	0	0	0	0	0	0	0	0	0	1760	0	0	0
IKKAS	546.367	0.07	4.91	6.5	10			0	0	0	1430	0	0	0	488	1080	915	0	869	0	0	0	574	0	0	0	0	292	0	3690	0	0	489	0	0	0	0	0	0	0	0	747
IKTITLVLAVSSGL	707.945	0.12	60	7.3	8.75			0	0	768	809	811	531	0	0	0	0	0	0	790	0	347	574	727	0	1170	0	926	0	805	652	0	0	0	432	692	715	0	0	511	0	1110
LPLSSIQQNSSEAQ(+.98)LPSNGTGP	742.7	0.02	60	7.6	4		Deamidation (NQ)	0	0	0	0	0	0	0	0	0	0	0	0	0	3790	1570	0	0	0	0	0	6050	0	7690	6680	0	0	2480	0	0	0	980	0	0	0	4850
LLLGIHDI	893.553	0.08	1.01	8.5	5.08			0	0	648	360	0	185	240	0	54.5	20.9	0	1860	227	1150	119	0	0	508	1120	268	0	95.3	0	790	237	781	0	0	129	0	0	0	0	0	372
TVPLHPVQG	947.569	0.12	2.91	9.1	6.4			427	0	870	0	1120	0	598	126	412	327	0	261	1000	101	135	0	0	0	3440	698	0	671	681	1200	114	14.4	0	140	319	0	0	0	94.6	89	3200
QGVNDNEEGFFSAR	785.351	0.01	60	0	4.14	sp|P02675|FIBB_HUMAN		0	0	0	0	0	0	0	0	0	5380	0	0	0	0	0	0	0	0	0	0	0	0	0	0	0	0	0	0	0	0	0	0	0	0	0
TEIPLIKISEFRVVVARIG	1070.66	0.02	60	8.1	8.41			0	0	0	0	0	0	0	0	0	1460	0	0	0	3780	140	0	0	0	3280	0	0	0	1680	2260	0	0	1950	343	72.3	306	0	2100	2370	1140	0
PLLILIVLLGQ	596.402	0.02	60	14.6	5.96	sp|P05997|CO5A2_HUMAN		0	0	0	0	0	0	4750	0	0	0	0	0	642	0	0	0	0	0	0	189	0	0	0	0	249	0	0	0	0	1620	0	0	470	0	0
Q(-17.03)TLVLIGKTHLTM(+15.99)ALTVIAGLVVI	835.174	0.01	5.14	7.4	8.76		Pyro-glu from Q; Oxidation (M)	0	553	0	0	0	0	0	0	4160	0	0	0	0	686	0	0	0	0	521	1280	0	20700	0	0	0	0	0	0	9550	0	0	0	0	0	0
RGYKKK	779.487	0.03	60	7.7	10.46			0	0	0	0	0	0	0	1470	0	1730	0	0	0	1170	0	0	740	292	0	0	0	0	0	0	0	0	0	0	0	365	128	0	0	127	415
THCGPCASL	444.691	0.14	60	3.1	6.4			0	0	0	0	0	0	0	0	0	5410	0	0	0	0	0	0	0	0	0	0	0	0	0	0	0	0	0	0	0	0	0	0	0	0	0
HPPIK	591.369	0.01	60	0	8.76			0	0	0	0	0	0	0	0	0	0	0	0	0	5410	0	0	0	0	0	0	0	0	0	0	0	0	0	0	0	0	0	0	0	0	0
EQMPNDQEEESFAEGHSE	698.274	0.04	60	11.6	3.77			879	460	0	0	0	0	0	0	0	0	0	0	0	2000	0	0	2080	0	0	0	1830	0	3070	1890	0	0	0	0	0	0	0	1660	0	0	6500
KSVRQIGT	888.528	0.06	5.03	9.2	11			0	0	0	335	0	180	0	263	0	251	0	930	0	0	119	0	2840	502	1000	6270	166	0	0	0	248	0	0	0	2390	361	0	0	3080	531	0
EEVSGNVSPGTRREYHTEKLVTSKGDKEL	649.933	0.04	60	5.6	5.65	sp|P02671|FIBA_HUMAN		0	0	0	0	0	1570	0	0	0	0	2510	1350	0	0	0	0	0	0	0	0	0	0	5000	0	0	0	0	0	0	0	1500	0	0	11100	983
Q(-17.03)PPTVVPGGDLAKVQ	744.906	0.02	60	6.3	5.84	sp|P68366|TBA4A_HUMAN	Pyro-glu from Q	0	0	0	0	0	0	0	0	0	0	0	0	0	5430	0	0	0	0	0	0	0	0	0	0	0	0	6480	0	0	0	4210	6630	0	0	21600
DCPVCL	649.27	0.02	1.4	6.4	3.8	sp|Q09472|EP300_HUMAN		1720	0	0	0	0	0	0	0	0	0	0	1450	0	0	0	1030	1240	0	0	0	0	0	0	1220	0	0	0	666	0	1420	0	858	0	0	1350
VGLLLFSVT	948.577	0.14	2.97	8.3	5.49			787	611	615	348	0	560	151	669	324	337	0	293	0	303	6.78	0	444	0	322	0	408	30.3	447	661	199	141	3270	47.2	854	0	265	162	0	160	0
NTSDPPSAQ(+.98)ECCDCQ(+.98)	800.267	0.01	60	0	3.49		Deamidation (NQ)	0	0	0	0	0	0	0	0	0	0	0	0	5450	0	0	0	0	0	0	0	0	0	0	0	0	0	0	0	0	0	0	0	0	0	0
NDNEEGFFS	529.704	0.02	60	2.8	3.57	sp|P02675|FIBB_HUMAN		0	0	0	0	0	5450	0	0	0	0	0	0	0	0	0	0	0	0	0	0	0	0	0	0	0	0	0	0	0	0	0	0	0	0	3430
R(+42.01)ATALGALVSLLLLLPLPRGAGGLGERP	706.697	0.04	60	7.4	11.7		Acetylation (Protein N-term)	0	0	0	0	0	0	0	0	0	5460	0	0	0	0	0	0	0	0	0	0	0	0	0	0	0	0	0	0	0	0	0	0	0	0	0
ESRGSESGIFTNTKESSSHHPGIAEFPSRG	638.507	0.03	60	4.7	6.05	sp|P02671|FIBA_HUMAN		0	0	0	0	0	0	0	0	0	0	0	0	0	5460	0	0	0	0	0	0	5290	0	0	5260	0	0	0	0	0	1140	0	0	0	0	0
KIVPLTC	773.471	0.09	4.6	8.2	8.22			0	0	0	0	0	957	0	0	1240	1010	275	31.4	0	279	0	667	1010	0	0	8980	704	0	296	369	183	948	9740	429	0	0	510	287	2430	0	0
Q(-17.03)SSQPQSAATAPSAM(+15.99)FPYPGQHGP	814.364	0.01	60	5.5	6.74		Pyro-glu from Q; Oxidation (M)	0	0	0	0	0	0	0	0	0	1470	0	0	0	0	1200	0	2800	0	7990	0	0	0	2800	0	0	0	0	0	0	0	0	0	0	0	6900
VFGFVKR	852.522	0.08	1.2	8.1	11			229	306	0	0	595	0	1410	0	212	465	0	0	667	0	580	724	287	0	653	699	0	0	0	0	489	0	451	0	0	0	0	0	761	0	0
VVAKMIAQ(+.98)KV	544.346	0.03	60	4.6	10		Deamidation (NQ)	0	0	0	0	0	0	0	0	1440	4040	0	0	0	0	0	0	0	0	0	0	0	0	0	0	0	0	0	0	0	0	0	0	0	0	0
ACHSCSEDSGSDVSS	735.763	0.02	60	9.7	4.02			0	0	0	1790	0	745	0	0	1550	0	0	0	0	0	1400	0	0	0	1820	0	0	0	0	0	0	0	0	0	0	0	0	0	0	0	0
CFCPEGMTLFSTSAQVCVPTGCPR	634.284	0.01	60	2.3	5.97	sp|P98088|MUC5A_HUMAN		0	0	0	0	0	0	0	0	0	5490	0	0	0	0	0	0	0	0	0	0	0	0	0	0	0	0	0	0	0	0	0	0	0	0	0
IAKAGYTKLTPVQ(+.98)KYSIPIILA	797.16	0.02	5.13	11.2	9.83		Deamidation (NQ)	0	0	1460	0	38.7	0	462	0	942	1840	0	0	0	212	0	0	537	0	0	762	90.9	0	0	0	8540	0	612	0	0	0	0	610	0	0	0
FLSLALPKG	945.582	0.03	60	11.1	8.75			0	0	0	0	0	0	74.5	0	0	313	0	1340	0	0	3770	0	0	0	0	0	126	316	0	3480	212	0	374	0	195	0	243	0	185	0	0
GPCGSP	517.206	0.04	60	3.5	5.52			0	0	0	0	0	0	0	0	0	0	0	0	0	5510	0	0	0	0	0	0	0	0	0	0	0	572	0	0	0	0	0	0	0	3370	0
E(-18.01)TNSSELTDMSEM(+15.99)M(+15.99)SA	888.83	0.03	60	7.5	3.5		Pyro-glu from E; Oxidation (M)	0	2210	0	0	0	0	0	0	1780	0	1540	0	0	0	0	0	0	0	0	0	0	0	0	0	0	0	0	0	0	0	0	0	0	0	0
PNTAR	558.287	0.34	60	3.5	10.18			0	3010	0	0	0	0	0	0	0	0	0	0	0	0	1410	1110	0	0	1650	0	0	0	2050	0	1240	0	1200	1110	1780	1820	0	0	1080	2350	2740
E(-18.01)PKVIQKEKKPSKEATLELILKRLKEKRIER	935.81	0.01	60	12.9	9.99		Pyro-glu from E	0	0	0	0	0	0	0	2900	0	2480	0	0	0	158	0	0	0	0	0	0	0	1730	1600	0	0	1800	0	0	0	330	0	0	0	0	0
SDCFREPCNQN(+.98)AQTNAASFDQDQ	648.265	0.03	60	4.8	3.84		Deamidation (NQ)	0	0	0	0	0	0	0	0	0	5540	0	0	0	0	0	0	0	0	0	0	0	0	0	0	0	0	0	0	0	0	0	0	0	0	0
CPCGSCC	672.157	0.02	60	9.6	5.5			0	1050	0	0	0	0	0	0	0	0	0	0	0	3180	0	699	0	623	0	0	0	729	0	0	0	0	0	0	1000	0	0	0	0	0	0
IRLSAGVTGT	974.571	0.05	6.04	9.6	9.75			0	0	0	49.2	292	514	0	0	0	219	0	0	3460	0	0	1020	0	0	0	833	114	423	29700	0	828	0	0	735	250	398	0	0	0	0	0
AGDGEGSAEGAGGPSGEP	501.198	0.01	60	3.2	3.5			0	0	0	0	0	1300	0	0	0	0	0	0	4260	0	0	0	0	0	0	0	0	2770	0	0	0	0	0	0	0	0	0	0	0	0	0
EGDGGRTSDT	994.406	0.01	60	8.8	4.03			0	0	0	0	0	0	0	0	0	0	5560	0	0	0	0	0	0	0	0	0	0	0	0	0	0	0	1480	0	0	12000	0	0	0	0	0
TM(+15.99)QVSHSQ(+.98)VQEPGGVPQVFLT	762.725	0.01	60	7	5.21		Oxidation (M); Deamidation (NQ)	1530	0	0	0	0	0	0	0	2890	0	1140	0	0	0	0	0	0	0	1160	0	0	0	0	994	0	0	0	32000	0	0	0	0	1250	0	0
GSEMVVAGKLQ	559.797	0.08	60	5.4	6			0	0	0	0	478	0	0	0	0	0	0	0	0	0	0	2780	0	2310	7410	919	0	0	0	2080	0	0	0	0	0	0	0	0	0	3810	0
LGPHK	551.328	0.01	60	8	8.76			0	5580	0	0	0	0	0	0	0	0	0	0	0	0	0	0	0	0	0	0	11100	0	0	0	0	0	0	0	0	0	0	0	0	0	0
KGKSKITPAMAARIKQIKPLLSASSRLGRALAELFG	952.828	0.01	60	8.6	11.75			0	0	0	0	0	1710	0	0	0	0	0	0	0	407	673	1530	1270	0	312	0	0	0	3930	0	0	1460	0	0	0	0	0	0	0	0	0
KATVELKA	859.532	0.13	2.69	7.4	8.59			0	0	0	465	156	323	293	249	1010	606	273	24.1	360	349	517	0	722	248	0	0	291	178	0	535	0	377	780	0	340	0	515	0	0	0	0
E(-18.01)RIILHAI	946.578	0.12	1.2	8.5	6.85		Pyro-glu from E	354	0	0	234	461	199	0	0	1470	393	0	0	0	578	460	681	355	413	168	336	320	230	0	237	221	0	0	45.5	0	599	0	470	259	393	0
FTKKKPVAG	488.301	0.07	60	5.5	10.3			0	0	0	0	688	0	1280	0	0	0	0	0	0	0	3630	0	0	0	4270	3230	0	1140	2110	0	0	0	0	0	3150	5680	0	0	2410	0	0
FIAVLGILSIIAQTIVLSLLMRSI	862.205	0.04	3.23	8.1	9.75			0	0	503	254	681	133	0	519	1300	1270	0	393	0	0	0	0	339	209	465	0	0	0	0	247	609	0	0	0	68.5	0	546	0	0	221	0
RRPENM(+15.99)KRRRRRDILRVQ(+.98)LVRIFELLADAGV	963.057	0.01	60	9.5	11.91		Oxidation (M); Deamidation (NQ)	0	0	0	5610	0	0	0	0	0	0	0	0	0	0	0	0	0	0	0	0	1840	3420	1900	1810	0	0	0	2600	0	0	0	0	0	0	0
HGM(+15.99)FEDDT	967.336	0.01	60	11.7	4.02		Oxidation (M)	2480	0	0	0	0	0	0	0	0	2360	0	0	812	0	0	0	0	0	0	0	0	0	0	0	0	0	0	0	0	0	0	0	0	0	0
SISSSGQEIQQ	582.276	0.02	60	12.2	4			980	0	0	0	393	0	0	0	0	0	0	0	0	4290	0	0	0	0	0	0	1900	0	0	0	0	0	0	0	0	0	1000	1620	0	2050	0
RPPGFSPFR	354.195	0.1	60	5.8	12			0	0	0	0	0	0	0	0	0	5680	0	0	0	0	0	0	0	0	0	0	0	0	0	0	0	0	0	0	0	0	0	0	0	0	0
E(-18.01)GGMKGEKGSKGDSGMEGKSGRNGLPGA	665.817	0.01	60	10	8.53		Pyro-glu from E	0	0	0	0	0	0	0	0	0	0	2390	0	0	0	0	0	3290	0	0	0	0	0	0	523	0	0	0	0	0	0	1510	801	0	0	4840
PGMPGSDGPPGHPGKEGPPGTKGNQG	804.031	0.02	60	7.4	7.17			0	0	2030	0	0	0	0	3680	0	0	0	0	0	0	0	0	0	0	0	0	0	0	0	0	0	1110	0	0	0	0	0	0	0	0	7680
HVAAASLIRL	1050.63	0.15	4.1	9.2	9.76			426	0	1030	552	237	488	0	124	0	114	0	216	0	311	389	368	742	715	397	0	141	278	651	321	424	575	795	534	351	47.4	0	301	271	0	0
QSPVPALPIV	1020.61	0.17	1.74	8.6	5.52	sp|O95714|HERC2_HUMAN		0	0	711	407	500	765	475	0	224	317	0	530	393	154	40	233	430	541	743	52.2	699	415	569	189	56.6	200	309	484	349	471	303	0	936	12.2	1770
MVLKIIAFKPK	644.409	0.12	60	4.2	10.3			0	0	0	0	699	631	0	0	0	0	0	0	0	0	928	1740	1730	0	1730	2970	1590	2260	0	4640	0	0	906	1250	2570	1710	0	3820	1280	3460	3900
GLPGLKGLPGN	1022.61	0.12	3.26	7.6	8.75			30.3	1880	0	0	610	109	0	336	263	202	0	0	0	0	0	0	990	1320	98.3	188	515	0	928	571	498	0	268	205	451	52.6	430	0	0	366	0
SVSENLLKEAIRAIFPSRGLARLALQFTTN(+.98)PKRLQQN	1046.11	0.01	60	18.2	11.55		Deamidation (NQ)	0	0	0	0	0	0	1730	0	0	0	0	0	0	0	4020	0	0	0	0	0	0	0	0	0	0	0	0	0	0	0	0	0	0	11100	0
KQFTSSTSYNRGDSTFESKSYKMA	550.861	0.02	60	9.5	9.4	sp|P02671|FIBA_HUMAN		0	4180	0	0	0	0	0	0	0	0	0	0	0	0	0	0	0	1570	5880	0	0	1090	2440	0	983	0	0	0	0	0	0	4080	0	0	0
APAIVAPLPGR	1061.65	0.08	2.02	7.3	9.79			0	0	348	0	1540	622	373	0	0	403	0	839	0	824	296	26.9	142	344	163	65.4	486	0	0	0	194	0	561	0	0	140	137	269	0	219	0
CSSASSSSS	401.652	0.01	60	0.4	5.52			5790	0	0	0	0	0	0	0	0	0	0	0	0	0	0	0	0	0	10100	0	0	0	0	0	0	0	0	0	0	4450	0	0	0	0	0
E(-18.01)IPGEFTQDDLAEDDVM(+15.99)LLD	754.995	0.02	60	3.3	3.16		Pyro-glu from E; Oxidation (M)	0	0	0	0	0	0	0	0	0	0	0	339	0	5460	0	0	0	0	0	0	5940	0	0	0	0	7240	891	0	0	0	0	0	0	0	0
LKARKSATV	487.31	0.05	60	8.1	11.17			0	0	0	0	950	2060	0	0	0	0	0	0	0	0	2790	0	0	0	1980	2910	2770	0	2900	2160	0	0	0	1860	2200	0	0	0	1510	0	0
SWSSLDARRESGSGPSTDTL	1055.01	0.01	60	0	4.56			0	0	0	0	0	0	0	0	0	0	0	0	0	0	0	0	0	5810	0	0	0	0	0	0	0	0	0	0	0	0	0	0	0	0	0
E(-18.01)KKKHMA	853.487	0.01	60	10	9.71		Pyro-glu from E	0	0	0	0	0	0	0	1940	0	0	0	0	0	0	1670	2200	0	0	1420	150	0	0	0	0	0	0	223	0	2000	276	0	0	2130	0	0
KNKGVQPLLD	1111.67	0.11	60	7.1	8.59			0	0	414	1010	1150	2610	0	0	0	636	0	0	0	0	0	0	0	0	1280	189	0	826	0	2050	488	1250	565	181	176	451	390	266	761	783	677
YKLGVKT	808.49	0.04	4.09	8.1	9.7			0	0	0	0	769	0	0	0	0	992	0	0	0	946	0	0	1140	1990	0	0	0	0	13600	0	0	114	0	0	864	3330	0	0	0	702	0
RVATVLAT	830.512	0.07	2.68	9.5	9.75			0	0	1170	0	0	1080	0	435	0	278	297	0	910	1680	0	0	0	0	2050	343	0	149	0	491	619	18.2	0	0	0	6.01	127	0	0	0	0
AGATARVVAAAGRALRGLSYRSLRRRVRRLRRLT	952.324	0.04	3.31	11.5	12.65	sp|P21817|RYR1_HUMAN		0	0	0	0	636	0	3300	232	0	66.9	0	0	0	794	481	0	343	0	0	0	0	0	0	2060	559	1090	0	70.2	1600	978	0	330	1590	301	1240
TADGT	464.188	0.06	60	1.6	3.8	sp|P22105|TENX_HUMAN		0	0	0	0	0	0	0	3470	2410	0	0	0	0	0	0	0	0	0	0	0	0	0	0	0	0	0	0	0	0	0	0	0	0	0	0
TSQ(+.98)PM(+15.99)PPGVGTSTSHQPATPSGGTAQTPEPGT	770.361	0.01	60	9.5	5.21		Deamidation (NQ); Oxidation (M)	1570	0	0	1340	1660	0	0	0	0	0	0	0	0	1310	0	0	0	0	0	0	1230	2610	0	0	0	0	620	280	0	0	0	0	4900	0	1810
KKEEGQ(+.98)LLSVEALPESTDSSLENLPLAPLYPS	691.957	0.01	60	2.7	4.14		Deamidation (NQ)	0	0	0	0	0	0	0	0	972	0	3400	1510	0	0	0	0	0	0	0	0	0	0	0	0	0	449	0	1130	0	0	0	0	786	0	0
ARATVAPLP	895.555	0.05	3.83	8.4	9.79			0	0	202	0	273	0	0	0	1530	123	816	1180	175	639	222	0	0	727	940	0	577	135	0	3200	0	0	0	0	0	0	278	285	0	69.5	0
HIKPPVVNLLLSAEL	822.008	0.01	2.69	7.8	6.75			228	0	0	0	1490	0	0	0	0	2410	0	0	0	390	0	0	850	523	903	0	0	0	0	0	0	0	629	0	0	0	0	0	0	3070	0
KKRLLVVRELKEQ	820.029	0.02	60	10.3	10.28			313	0	0	0	0	0	0	0	0	0	0	0	0	3840	1750	0	0	0	0	0	0	1210	0	0	0	0	0	0	0	0	0	0	0	0	0
LNRSWLGLRFLRALRLIQ(+.98)FSEILQFLNILKTSNSIKLVN	926.568	0.01	60	9.2	12.01		Deamidation (NQ)	3310	2610	0	0	0	0	0	0	0	0	0	0	0	0	0	0	0	0	0	0	0	0	0	2280	0	0	0	0	0	0	0	0	0	4300	0
P(+42.01)QRSLLLL	981.605	0.12	5.51	8.7	10.18		Acetylation (Protein N-term)	912	224	968	487	402	205	0	0	0	255	30.2	0	0	159	108	341	1150	694	2630	0	320	163	29	329	174	313	543	285	264	0	0	1230	178	0	498
PKVEVKTT	901.554	0.04	2.77	9.6	9.01			507	0	0	0	230	349	0	305	715	121	0	21	0	2400	631	657	0	0	2460	0	0	0	180	0	146	0	74.2	0	0	0	1310	0	623	0	0
Q(-17.03)GSAH	482.202	0.01	60	3	6.74		Pyro-glu from Q	0	0	0	0	0	0	297	0	0	0	5640	0	0	0	0	0	0	0	0	0	0	333	0	0	1280	0	0	0	0	0	0	0	0	0	0
AVADTRDQADGSRASVDSGSSEEQGGSSRALVSTLVPLG	958.965	0.03	60	12.5	4.23			0	0	0	0	0	5950	0	0	0	0	0	0	0	0	0	0	0	0	0	2750	0	0	0	0	0	0	0	0	0	0	0	0	0	0	0
ERELEEARKKLAQI	571.661	0.01	60	6.6	6.39			0	0	0	0	0	0	0	0	0	0	836	0	5120	0	0	0	0	0	0	0	0	0	0	0	0	0	0	0	0	1630	0	0	0	852	0
LSRPIQ(+.98)SPG	478.256	0.02	60	6.2	9.75		Deamidation (NQ)	0	0	0	0	0	0	0	0	0	5960	0	0	0	0	0	0	0	0	0	0	0	0	0	0	0	0	0	0	0	0	0	0	0	0	0
SGSAHST	646.293	0.01	60	0.5	6.46			0	0	0	0	0	0	0	0	0	0	0	0	0	5960	0	0	0	0	0	0	0	0	0	0	0	1810	0	0	0	0	0	0	0	0	0
MPKVIKKTR	550.864	0.05	60	11.6	11.26			0	0	0	841	1300	0	3540	0	0	0	0	279	0	0	0	0	0	0	827	0	0	0	31.9	0	1990	0	0	781	0	3160	5360	0	0	0	2740
Q(-17.03)GKSKRRFL	1102.66	0.13	4.33	7.4	12.02		Pyro-glu from Q	0	0	0	917	0	0	759	0	0	476	0	421	1660	0	1170	276	287	0	2150	322	2170	2820	214	1440	435	445	136	208	3860	260	88.3	1700	120	730	1780
FLQGLLGLLT	1074.65	0.06	2.94	8	5.52			0	0	205	1140	502	973	553	0	0	1900	0	49.7	0	660	0	0	0	0	1050	0	542	0	302	266	419	6090	0	232	201	0	0	0	250	243	0
TKENEGFTVTAEGK	504.248	0.01	60	6.5	4.78	sp|P01024|CO3_HUMAN		0	0	0	0	2450	2440	1110	0	0	0	0	0	0	0	0	0	0	0	0	0	0	0	0	0	0	0	0	0	892	0	0	0	0	0	0
TKEPGRTLEPQ	419.221	0.04	60	1.5	5.81			6000	0	0	0	0	0	0	0	0	0	0	0	0	0	0	0	0	0	0	0	1630	0	0	817	0	0	0	2230	0	0	0	0	0	0	0
SSSYSKQFTSSTSYN	837.371	0.01	60	7.2	8.22	sp|P02671|FIBA_HUMAN		0	0	0	0	0	0	662	0	0	5360	0	0	0	0	0	0	0	0	3390	528	0	0	0	0	0	0	0	0	0	0	0	0	0	0	0
QSEATLTVQ(+.98)DSPTIAPDVTEKLREPLVVKAGKPVIVKIPFQSHLPIQAAWRK	1147.06	0.01	60	4.8	9.4		Deamidation (NQ)	0	2610	0	0	0	0	0	0	0	0	0	0	0	3430	0	0	0	0	0	0	0	0	0	0	0	0	0	0	0	0	0	0	0	0	0
KIVGA	487.329	0.02	60	6.3	8.75			0	0	0	0	0	0	0	0	0	0	0	0	0	0	0	0	6040	0	0	217	0	1870	0	0	0	0	6670	0	0	0	0	3630	0	0	0
DGSLDSWGTSEDADAPSK	919.379	0.01	60	0	3.71			0	0	0	0	0	0	0	0	0	0	0	0	0	0	0	0	0	6050	0	0	0	0	0	0	0	0	0	0	0	0	0	0	0	0	0
Q(+.98)VPKILSGK	970.591	0.15	1.67	7.6	10		Deamidation (NQ)	957	0	149	0	0	0	198	0	1610	816	0	0	969	493	322	234	185	127	114	121	0	399	1390	819	530	468	0	46.7	316	705	0	192	0	1840	256
VCCLPTCSKDSSSCCQQSSCQPTCCASSSSQ(+.98)Q(+.98)SC	867.814	0.01	60	4.2	5.76		Deamidation (NQ)	0	0	0	0	0	0	0	0	0	6070	0	0	0	0	0	0	0	0	0	0	0	0	0	0	0	0	0	0	0	0	0	0	0	0	0
ANRQ(+.98)STGSAPQGPAYHGVNRTDEMLHTDQ(+.98)RANHEGS	973.703	0.04	60	3.9	6.28		Deamidation (NQ)	0	0	0	0	0	0	0	0	0	0	0	0	0	0	0	0	6080	0	0	0	0	0	14600	0	0	0	0	0	0	0	0	0	0	0	0
PSFTARIQ(+.98)LFLLRALGFLIGLVGRAALVLGGPKF	904.042	0.01	60	8.8	12.3		Deamidation (NQ)	0	0	0	0	0	0	0	5310	0	0	0	0	0	0	796	0	0	0	0	0	0	0	4640	1020	0	0	0	0	0	0	0	0	0	2630	0
KVHPK	608.38	0.02	60	9.7	10			0	0	0	0	0	2270	0	0	0	0	0	0	0	0	0	3840	0	0	0	0	3610	0	0	0	0	4120	0	0	0	0	0	0	0	0	0
KKKFGVES	922.551	0.03	5.59	8.5	9.7			0	0	0	1430	0	0	0	0	3310	940	191	0	0	0	144	0	107	0	531	0	47.3	0	0	0	0	0	0	0	0	0	164	0	0	0	0
HLSQDTGSPSGM(+15.99)RPWEDLPSQDTGSPS	962.425	0.03	60	5.4	4.22		Oxidation (M)	0	0	0	2450	0	0	0	2800	0	0	0	877	0	0	0	0	0	0	0	0	0	0	0	0	0	3120	1260	0	0	0	0	0	0	0	0
Q(-17.03)PKLIVH	817.486	0.05	4.36	10.1	8.76		Pyro-glu from Q	2720	0	483	0	0	0	121	0	0	590	0	0	0	1280	0	939	0	0	1030	0	1370	1040	0	6060	577	0	0	0	0	0	0	1380	0	0	608
RQTWSVLLLLLLFFIPGVVM(+15.99)AVAYGLISR	1098	0.01	60	11.2	10.84		Oxidation (M)	0	0	1240	0	1190	0	730	2050	0	0	0	0	0	928	0	0	0	0	1140	4410	0	3310	0	0	0	0	0	0	0	0	0	0	0	0	0
YIRATVRKERGLPVLVELLQ(+.98)SETDKVVRAVAIALRNLSLDRRN	987.191	0.02	60	12	10.8		Deamidation (NQ)	0	0	0	0	4510	1630	0	0	0	0	0	0	0	0	0	0	0	0	0	2380	2440	0	0	3730	3950	0	0	0	1770	0	0	0	0	0	5000
LGAGLLLQPPTPPPLLLLLFPLLLFSRLCG	1061.66	0.01	3.76	10.5	8.25			0	0	0	915	428	996	0	0	0	906	0	0	0	0	376	2520	0	0	0	0	0	0	0	0	0	20.1	0	0	0	0	0	0	883	0	0
PPLAPISGPLFP	1205.72	0.08	4.48	9.2	5.96			0	0	786	1630	480	293	1430	0	1110	0	0	0	0	0	0	0	0	426	1310	960	261	124	1400	779	606	543	831	0	479	569	162	291	267	0	1720
QSTGMMNSPVNQPAMGMNTGMNAGMNPGM(+15.99)LAAGN(+.98)GQG	911.116	0.02	60	5.2	5.52	sp|Q09472|EP300_HUMAN	Oxidation (M); Deamidation (NQ)	0	0	0	936	0	0	0	0	1770	0	0	2140	0	1320	0	0	0	0	0	0	0	0	0	0	0	0	0	0	0	0	0	0	0	0	0
ELEN(+.98)EYAINKFINKDKRRRISAATNLSERQVTIWFQ(+.98)NRR	962.722	0.01	60	10.2	10.4		Deamidation (NQ)	0	0	3230	0	0	0	2940	0	0	0	0	0	0	0	0	0	0	0	0	0	0	0	0	0	69.1	0	0	0	21100	2060	13100	0	0	0	0
FRLRGIKAQVALRLAELARRQRRRQARREA	912.047	0.01	1.98	7.7	12.37			147	0	3670	0	0	0	0	0	0	1080	0	0	0	0	0	1280	0	0	0	0	1760	0	0	0	0	0	0	0	0	0	0	0	1820	0	0
VPPEWKALTDM(+15.99)PQM	829.903	0.01	60	0	4.37	sp|P02671|FIBA_HUMAN	Oxidation (M)	0	0	0	0	0	0	0	0	0	0	0	6180	0	0	0	0	0	0	0	0	0	0	0	0	0	0	0	0	0	0	0	0	0	0	0
Q(+.98)(+42.01)LALVIGGTIGGLLLLLLIGASCCLWRRF	1038.26	0.01	60	9.8	9.02		Deamidation (NQ); Acetylation (Protein N-term)	0	0	0	0	0	0	0	0	0	6180	0	0	0	0	0	0	0	0	0	0	0	6260	0	0	0	0	4110	0	0	2970	0	0	0	0	0
EDKTERELLESYIDG	599.624	0.05	60	4.8	4.08			0	0	0	0	0	0	6180	0	0	0	0	0	0	0	0	0	0	0	0	0	13400	0	0	0	0	22600	4710	0	0	0	0	0	0	0	0
FLSPATLL	861.509	0.01	4.69	6.7	5.52			356	0	0	0	0	0	0	0	0	1710	0	0	0	0	0	4120	0	0	0	0	556	0	0	0	0	0	0	0	0	0	0	0	366	0	0
SYKM(+15.99)ADEAGSEADHEGTHSTKRGHA	538.442	0.01	60	2.5	5.76	sp|P02671|FIBA_HUMAN	Oxidation (M)	0	0	2610	0	0	867	0	0	1750	0	0	961	0	0	0	0	0	0	0	0	0	0	0	0	0	0	1170	0	0	0	5530	470	0	709	0
KKRGT	589.369	0.04	60	8.1	11.17	sp|A3KMH1|VWA8_HUMAN		0	0	1250	1810	0	1990	0	0	1140	0	0	0	0	0	0	0	0	0	0	0	0	0	0	0	1590	0	0	0	0	0	263	0	0	0	0
GEPDSPWTGSGGTTPSTPTTPTTEGEGDGLSY	1047.12	0.02	60	5.5	3.39			0	0	704	0	0	0	0	0	0	0	0	0	2580	2040	869	0	0	0	0	0	0	0	0	0	0	0	625	0	0	0	0	0	0	0	0
KLIGG	487.32	0.17	2.39	5.8	8.75			289	0	0	0	617	506	1260	484	694	704	380	0	716	0	0	0	550	0	0	197	0	549	550	403	414	0	665	497	0	330	474	0	776	0	1060
RSQ(+.98)KRKLQLGLQFLPGK	666.735	0.05	60	7.6	12.02		Deamidation (NQ)	0	0	3850	0	0	0	0	0	1620	0	0	0	0	0	0	0	738	0	991	0	0	2270	0	0	1930	1860	3860	0	0	4110	0	934	0	0	6120
SSCGC	456.127	0.04	60	1.3	5.24			2560	0	0	0	0	0	0	1930	0	0	0	0	0	0	0	0	1720	0	0	0	0	0	0	0	0	0	0	0	0	0	0	0	0	0	0
FIALKSVLGF	547.828	0.01	60	10.1	8.75			0	0	0	0	0	0	0	0	0	6210	0	0	0	0	0	0	0	0	0	0	0	0	0	0	0	0	0	0	0	0	0	0	0	0	0
N(+.98)DNEEGFF	486.682	0.01	60	0	3.57	sp|P02675|FIBB_HUMAN	Deamidation (NQ)	0	0	0	0	0	0	0	0	0	0	6230	0	0	0	0	0	0	0	0	0	0	0	0	0	0	0	0	0	0	0	0	0	0	0	0
RIHWESASLLR	456.59	0.13	60	4	9.61	sp|P01024|CO3_HUMAN		0	3200	0	0	0	0	0	0	0	0	0	0	0	0	0	0	0	3040	0	0	991	0	5300	2290	1550	0	0	0	1560	0	1560	0	0	2920	0
PGEN(+.98)GFPGQMGIR	680.819	0.18	60	3.5	6.43		Deamidation (NQ)	0	928	512	0	0	0	0	0	1130	0	0	429	726	0	0	894	471	1170	1380	0	0	363	0	0	573	0	0	0	332	525	0	0	385	0	0
GRVAL	515.337	0.02	60	8.4	9.75			0	1820	0	0	0	4440	0	0	0	0	0	0	0	0	0	0	0	0	0	2870	0	0	0	782	0	871	0	0	3530	0	0	0	0	0	0
LVPILLVTLVFT	664.42	0.07	60	7.5	5.52			0	0	0	0	0	0	0	0	0	6270	0	0	0	0	0	0	0	0	0	0	0	0	10600	0	0	0	0	0	0	0	0	0	0	0	0
AGGGD	376.154	0.02	60	10.3	3.8			0	0	0	709	0	3240	1300	0	0	0	0	0	0	0	0	0	1030	0	16700	0	0	0	0	0	0	0	372	1580	0	5430	0	0	0	427	0
LQGAKIPKPEASFSPR	432.247	0.03	60	1.6	9.99			0	0	0	0	0	0	0	0	0	0	0	0	0	0	0	0	0	6290	0	0	0	0	0	6880	0	0	0	0	0	0	0	0	0	13300	0
GGGAYG	481.206	0.04	60	4.7	5.52			0	0	0	0	1580	0	0	0	0	2530	2190	0	0	0	0	0	0	0	0	0	0	0	0	0	0	0	0	0	0	0	0	0	0	0	0
LQERGDNDISPFSGDQPFKN	755.357	0.01	60	7.8	4.23			0	0	0	0	0	0	0	3830	0	0	955	1520	0	0	0	0	0	0	0	0	3270	0	0	0	0	2830	1690	0	0	0	2680	3440	0	0	0
KVMKK	633.42	0.03	60	8.5	10.3			0	0	3880	0	0	2430	0	0	0	0	0	0	0	0	0	0	0	0	0	0	0	0	0	0	2230	3820	0	2350	0	0	0	3600	0	0	0
DSSRDDESKEAKSTDPDSTGGPGPN(+.98)PN(+.98)PTPSCGANGGGGGGPSPAGAP	882.559	0.02	4.8	12.7	4.09		Deamidation (NQ)	0	0	0	0	1140	0	0	0	396	0	0	0	0	0	2400	2380	0	0	0	0	0	0	1950	0	0	0	0	0	0	0	0	0	0	0	9640
TLLPPALRALR	610.895	0.09	60	5.2	12	sp|A6NKX4|S22AV_HUMAN		0	0	0	0	0	1320	0	0	0	0	0	0	0	0	5000	0	0	0	2550	3430	0	1450	2230	0	0	1010	0	1060	1460	2630	1790	0	1770	2640	0
VPPNNSNAAEDDLPTVELQGVVPR	844.431	0.01	60	9.9	3.92			0	0	0	0	0	0	0	0	0	0	0	0	0	4420	1920	0	0	0	10400	0	17100	4670	9090	0	0	6020	6800	0	0	0	0	0	4950	3940	0
SGANTATNSESSTTSSGANTATNSDSSTTSSGASTAT	843.606	0.02	60	7.9	3.67			524	0	0	0	0	2660	0	0	0	0	0	735	0	0	0	0	2430	0	2380	495	0	0	0	0	0	0	0	507	0	0	0	1650	6590	0	5810
E(-18.01)AEVAAGARFTAPQ	700.36	0.01	60	11.2	4.53		Pyro-glu from E	0	0	0	0	0	0	0	0	0	0	0	6350	0	0	0	0	0	0	0	0	6160	0	0	0	0	0	0	0	0	0	0	0	0	0	0
ARRLRRTLRAGKSTLADLLLPVLFVALAMG	820.496	0.01	60	9.1	12.18			5190	0	0	404	0	0	0	0	763	0	0	0	0	0	0	0	0	0	0	0	0	1270	987	949	0	0	3220	0	0	0	0	812	0	0	0
TYAPVISAEKAYHEQ	569.617	0.06	60	6.8	5.37	sp|P68366|TBA4A_HUMAN		0	0	0	0	0	0	0	0	0	0	0	0	0	0	0	0	2460	3900	0	505	0	0	0	0	0	0	0	0	0	1510	0	1000	0	0	0
KKKMKSKKK	567.38	0.1	60	8.5	10.78			0	0	0	0	1620	0	0	0	0	0	0	0	0	3650	1090	0	0	0	3560	0	1980	0	4120	1320	0	7360	0	2850	0	4310	6740	4670	4080	0	6800
HGIRLLEA	908.556	0.16	4.7	7.3	6.75			0	808	346	1940	888	0	0	132	0	31.1	234	244	657	344	536	0	0	208	382	0	645	1260	817	1160	79.2	86.4	538	0	930	155	549	732	213	0	0
AIQLTYNPDESSKPNMIDAATLKS	869.771	0.02	60	0.6	4.56			0	0	0	0	0	6370	0	0	0	0	0	0	0	0	0	0	0	0	7210	0	0	0	0	0	0	0	0	0	0	0	0	0	0	0	0
AVRARLALALALASVLSGPPAVA	1094.17	0.02	60	8.6	12			0	0	0	6380	0	0	0	0	0	0	0	0	0	0	0	0	0	0	370	0	156	0	0	0	1730	0	699	0	6490	0	0	1750	312	5300	0
TDDLEDF	854.338	0.01	60	0	3.37			0	0	0	0	0	6390	0	0	0	0	0	0	0	0	0	0	0	0	0	0	0	0	0	0	0	0	0	0	0	0	0	0	0	0	0
HLKETQPGLLVASVLGLQKNN(+.98)KI	834.507	0.01	60	9.5	9.7		Deamidation (NQ)	0	1260	0	126	0	0	532	0	0	0	1240	0	0	410	174	0	0	2650	0	4410	0	0	0	0	0	899	0	0	0	0	0	0	0	3300	0
ALRYYN(+.98)QSEAGSHTLQ(+.98)RMYGCDVGP	705.316	0.01	60	8.2	6.78		Deamidation (NQ)	0	947	0	0	0	0	0	3550	0	0	1900	0	0	0	0	0	0	0	0	0	1960	0	0	0	0	2690	0	0	0	323	0	0	0	0	3110
HGPLSLLAPLPAAGKK	785.478	0.02	60	11.6	10			0	0	1090	0	911	449	0	704	0	0	3250	0	0	0	0	0	0	0	267	364	0	0	0	0	0	0	0	0	0	0	0	0	1210	0	0
QRRWEDIFN(+.98)Q(+.98)HEE	894.893	0.01	60	10.6	4.83		Deamidation (NQ)	1710	0	0	0	0	0	0	0	2150	0	2550	0	0	0	0	0	0	0	0	0	0	0	2530	0	0	0	547	0	0	0	0	0	3590	3980	0
LLAAL	500.338	0.01	60	17.1	5.52	sp|A1L4H1|SRCRL_HUMAN:sp|Q99698|LYST_HUMAN		0	0	0	0	0	0	1860	0	0	0	0	0	4560	0	0	0	0	0	0	5790	0	0	0	0	0	0	0	0	0	0	0	0	0	0	0
GQYGSGGSQ(+.98)SCSN(+.98)GQ	709.771	0.11	60	4.9	5.52		Deamidation (NQ)	804	862	0	0	245	694	287	94.2	396	0	28.4	0	845	326	350	259	612	623	2170	546	0	0	0	0	975	0	0	0	0	301	614	287	2000	0	155
QAPPVIRQAPPVIRQAPPVIRQAPPLIRQA	1093.33	0.01	5.41	8.3	12.48			0	0	0	0	2440	0	0	216	0	0	0	0	0	643	3130	0	0	0	4510	1950	802	0	0	0	0	0	1040	0	0	0	1440	0	2750	0	5030
LAALKKALAAAG	549.362	0.03	60	6.2	10			0	0	0	0	0	3280	1250	0	0	0	0	0	0	0	0	1910	0	0	2620	7600	0	1120	0	2890	0	6800	4600	2470	4360	0	1500	0	3100	0	0
SACGAQG	593.239	0.03	60	0.9	5.24			0	0	1920	0	0	651	0	0	0	0	0	0	0	0	0	0	0	3870	0	0	0	0	0	0	0	0	0	0	0	0	0	0	0	0	0
HLLLAVPHFGAGLLHISRL	1032.63	0.02	60	9.7	9.77			0	0	0	2780	0	0	443	0	0	3220	0	0	0	0	0	0	0	0	2240	1770	4100	0	0	0	4150	2290	0	0	0	0	0	0	0	1650	0
KPPKPPR	410.268	0.02	60	6.6	11.17			0	0	0	0	0	0	0	0	0	0	751	3210	0	0	433	0	2050	0	0	0	0	0	1820	0	0	269	0	1030	7150	0	0	0	0	0	0
VFPVVIQAVVD	1185.71	0.11	6.81	6.7	3.8	sp|O60291|MGRN1_HUMAN		0	0	2510	887	313	538	1160	0	0	0	0	550	0	0	225	269	0	0	3510	1250	372	1380	822	2530	2930	2650	1160	503	0	2860	314	1730	478	890	1300
QLLFLILPPPNRNLLKLLLDLLYQTA	758.97	0.02	5.71	5.6	8.59			2390	0	1610	91.8	0	0	0	0	1240	0	0	644	0	0	0	480	0	0	1610	0	0	0	0	3430	0	0	1630	0	0	0	0	0	0	0	0
PPVSVTK	727.442	0.01	60	8.7	9.18			0	0	0	0	0	0	0	3280	1920	0	0	619	0	0	638	0	0	0	0	0	0	0	0	2200	0	0	0	0	0	0	0	0	0	0	498
SPPSGGGWAGWG	1115.49	0.02	60	9	5.24			0	0	0	0	0	0	0	0	0	0	0	0	4040	0	0	2420	0	0	0	0	0	0	0	0	0	0	0	0	0	0	0	0	0	0	0
IDECENDYYN(+.98)GGCVHEC	491.677	0.01	60	0	3.83		Deamidation (NQ)	0	6460	0	0	0	0	0	0	0	0	0	0	0	0	0	0	0	0	0	0	0	0	0	0	0	0	0	0	0	0	0	0	0	0	0
QQ(+.98)LAVAMGPNIKQHVKNLGIPIITV	895.219	0.01	60	11.2	10		Deamidation (NQ)	0	0	0	0	401	0	0	0	3180	0	0	0	0	0	0	2880	0	0	0	0	715	0	0	0	0	1690	0	0	0	0	1350	0	0	0	0
RGLSAASPPL	968.593	0.02	4.23	9	9.75			3590	0	107	0	0	135	0	0	580	711	0	436	0	0	303	136	470	0	0	0	0	0	0	0	0	0	1040	0	0	0	0	201	0	0	0
SEGHSEESDTQSVSGHGQ(+.98)A	965.374	0.03	60	6.9	4.39		Deamidation (NQ)	0	0	0	0	0	0	0	0	0	0	2130	1320	0	1520	0	1500	0	0	0	0	0	0	0	2290	0	0	0	0	0	0	0	0	0	0	0
ADEAGSEADHEGTHST	807.332	0.01	60	1.4	4.17	sp|P02671|FIBA_HUMAN		0	0	0	0	4750	0	0	0	0	0	0	1720	0	0	0	0	0	0	0	0	0	0	0	0	0	0	0	0	0	0	0	0	0	3690	0
GLVAHRV	751.458	0.01	60	10.8	9.76			0	0	0	0	0	0	0	2170	0	0	0	0	0	0	0	2900	1400	0	0	0	0	0	0	0	3130	0	0	2080	0	0	0	164	0	1210	1170
Q(-17.03)ERKRAQSEAEKLAKERQEAEEAKEALLQ	676.756	0.08	60	3.8	5.3		Pyro-glu from Q	0	0	0	0	0	0	0	2320	0	0	0	0	0	0	4150	0	0	0	0	0	2270	0	0	0	0	4120	6360	761	1590	3570	0	0	0	0	0
ENGQPQNCGGQWRTGSSQSSCCGQYGSGGSQSCSN(+.98)GQ(+.98)HEYGSCGRFS	968.192	0.01	60	5.3	6.79		Deamidation (NQ)	0	0	3280	0	0	0	0	0	0	0	0	0	0	3200	0	0	0	0	8500	0	0	0	0	0	0	0	0	0	0	0	0	0	0	0	0
KSN(+.98)SEEEEEEKEEEEEEEEEEEEEEEDENDDSKSPGKG	901.548	0.01	60	7.5	3.72		Deamidation (NQ)	1010	0	0	0	0	0	0	0	0	0	0	0	5470	0	0	0	0	0	8440	0	0	0	0	0	5980	0	0	0	0	0	0	0	1600	0	0
TFQKQ(+.98)GLAQ	511.274	0.01	60	8.2	8.41		Deamidation (NQ)	0	0	0	0	0	0	0	0	0	0	0	0	0	4050	427	0	2010	0	0	370	0	0	0	0	0	0	0	346	0	0	0	0	0	1930	0
KGAGKFILKLKEQVQASREDKKKG	896.219	0.01	60	8.5	10.12			0	0	0	0	0	0	3240	0	0	0	0	1550	0	0	0	1700	0	0	0	0	0	0	0	0	0	0	0	0	0	0	2230	8100	0	0	0
GLLFLGLLLLPLVVAFASAE	686.091	0.01	60	11.4	4			0	708	0	154	0	0	1540	322	55.1	3720	0	0	0	0	0	0	0	0	0	140	0	0	0	0	0	0	0	0	0	0	0	0	0	0	0
RLMLTL	746.469	0.02	60	9.5	9.75			0	210	0	393	0	0	0	0	1290	759	1170	0	748	1930	0	0	0	0	0	0	0	0	0	0	0	0	0	0	0	0	0	0	0	0	0
QGASQ(+.98)HDDRASQDWDVVKAGQMM(+15.99)TAS	709.788	0.02	60	6.2	4.56		Deamidation (NQ); Oxidation (M)	0	2880	0	0	0	0	0	0	0	0	0	3630	0	0	0	0	0	0	0	0	1480	0	3300	0	0	0	0	0	2460	0	0	6090	0	249000	341000
KPIIVAVNGP	1007.62	0.18	1.9	8.5	8.75			242	245	385	0	0	223	133	629	380	1030	0	218	698	634	617	396	257	427	0	122	361	0	518	137	332	80.7	407	47.5	0	579	141	0	364	779	26
YGKLPLIS	890.546	0.08	1.09	7.8	8.59			714	0	29.8	0	1570	884	0	243	1040	355	0	0	0	1150	0	0	149	416	4350	1490	0	0	0	611	0	56.5	0	0	0	0	0	688	576	333	0
SIIIVCGTL	918.557	0.19	2.77	10.4	5.24	sp|P98194|AT2C1_HUMAN		238	718	287	618	1220	372	210	182	0	59.6	494	399	885	244	184	394	51	0	2030	86.3	0	0	880	800	6.11	581	0	984	372	419	2620	61.2	397	499	1640
HRHPDEAAFFDTASTG	586.932	0.04	60	5.2	5.21	sp|P02671|FIBA_HUMAN		0	0	0	0	0	3780	0	0	0	0	0	2780	0	0	0	0	0	0	5150	2850	0	3400	0	0	3200	0	0	0	0	0	0	0	0	9570	0
E(-18.01)GSGEGDSASSQ	1092.42	0.02	60	11.1	3.57		Pyro-glu from E	0	1310	0	0	699	0	0	4570	0	0	0	0	0	0	0	0	0	0	0	0	0	0	0	0	0	0	0	0	0	0	0	0	0	16100	0
AGSRN(+.98)AGAFGFNISFLCKLRDTKST	666.344	0.02	60	7.5	10.05		Deamidation (NQ)	0	0	3210	1470	0	963	0	0	0	0	0	945	0	0	0	0	0	0	0	0	0	0	2540	0	377	417	2750	1480	954	0	0	0	0	0	0
LCGKIRPRKKARQK	841.539	0.01	60	8.7	11.75			0	0	0	2330	0	0	0	0	0	0	0	0	0	0	2900	1360	0	0	0	0	0	0	0	0	0	0	0	0	0	0	0	0	0	0	0
QNAKK	588.367	0.01	60	11.5	10			0	1960	2140	0	2030	0	0	0	0	101	0	0	0	0	0	360	0	0	0	0	0	0	234	0	595	0	0	0	0	4610	0	0	0	302	0
ESNLSRGDQILEVNSVN(+.98)VRH	756.381	0.01	60	7.1	5.45		Deamidation (NQ)	0	0	0	0	0	0	0	708	0	0	0	0	0	2820	889	0	2180	0	0	0	11500	0	4210	0	0	0	2240	0	0	0	0	1790	0	0	0
AAKKLQPI	434.787	0.02	60	13.6	10			0	0	0	0	0	0	6290	0	0	0	323	0	0	0	0	0	0	0	0	0	0	1240	6120	0	279	8800	0	0	0	0	0	0	0	0	0
GNPQLDSKFSNQGKQ(+.98)GGSASQSQPSP	878.068	0.01	60	7.6	8.59		Deamidation (NQ)	0	679	0	0	1830	0	4110	0	0	0	0	0	0	0	0	0	0	0	0	0	367	0	0	0	1740	0	0	4060	2610	3470	0	0	0	0	0
LVEGEIAEEAAEKA	486.915	0.03	60	4.2	3.98			0	0	0	0	0	0	0	0	0	0	3050	0	0	0	3580	0	0	0	0	0	0	0	0	0	0	1190	1130	1570	1380	4530	0	1340	0	0	0
LAFLRKALPRLHA	753.485	0.01	60	0	12.01			0	0	0	0	0	0	0	0	0	0	0	0	0	6640	0	0	0	0	0	0	0	0	0	0	0	0	0	0	0	0	0	0	0	0	0
ARPNNPDWGTFEEVSGNVSPGTRREYHTE	661.31	0.01	60	11.6	4.96	sp|P02671|FIBA_HUMAN		0	0	0	0	0	0	0	177	0	0	0	1580	0	4890	0	0	0	0	0	0	3400	0	0	0	0	3540	733	0	0	0	0	0	0	0	0
GLPGPPDVPDHA	586.296	0.01	60	6.5	4.2			0	0	0	0	0	0	0	0	0	0	0	0	0	0	0	0	1970	4700	0	0	2220	0	0	0	0	0	0	0	0	0	0	0	0	0	2320
SKITHRIHWESASLL	445.249	0.05	60	2.3	8.51	sp|P01024|CO3_HUMAN		0	0	0	6670	0	0	0	0	0	0	0	0	0	0	0	0	0	0	0	7430	4230	0	0	0	0	4810	0	0	0	0	0	3410	0	0	3780
TDLQERGDNDISPFSGD	933.412	0.07	60	8.2	3.71			0	0	0	0	0	0	0	0	0	0	2870	0	0	0	0	3810	0	0	0	886	3350	0	4510	0	1750	2200	3670	0	0	0	1730	0	0	2690	0
PRSN(+.98)AIFPNPEEPEGEEEDIQM(+15.99)ERM(+15.99)RTVNAM	913.158	0.01	60	11.6	4.22		Deamidation (NQ); Oxidation (M)	0	3000	0	0	0	0	0	2090	0	1600	0	0	0	0	0	0	0	0	0	0	0	0	0	0	0	0	0	0	0	0	0	0	0	0	0
LPVATRAVLITG	605.874	0.06	60	5.8	9.75			0	0	0	0	0	0	0	0	0	0	0	0	0	2730	1320	2650	0	0	0	0	0	0	2610	0	0	0	0	2270	0	3280	0	923	2040	0	1840
LLSPLLLLLVGGA	639.917	0.07	60	4.2	5.52			0	0	0	0	0	0	1860	0	0	0	0	0	0	2040	2810	0	0	0	0	2060	0	0	0	0	730	1160	1410	0	1040	0	1310	0	0	0	0
PLSIVEK	393.244	0.01	60	9.1	6.43			0	0	1580	0	1280	0	0	1950	0	0	0	0	0	0	0	0	0	1910	0	0	0	0	0	0	0	0	0	0	0	0	0	0	0	0	0
SSSGFSGSVGGQ	1056.46	0.01	60	9.8	5.24			0	0	0	1090	0	0	0	0	1890	0	3740	0	0	0	0	0	0	0	0	0	0	0	0	0	0	0	0	107	0	0	0	0	0	0	0
KEQVTNVGGAVVTGVT	779.926	0.03	60	4.7	6			0	0	0	0	0	0	0	0	0	0	0	0	1010	0	0	0	2660	3050	0	0	0	0	0	0	0	0	0	0	0	0	0	0	0	0	2220
HGILLIT	766.471	0.01	60	8	6.74			0	0	0	0	0	0	975	3180	0	0	0	0	0	1880	0	714	0	0	0	0	0	0	98.4	0	0	2110	0	0	0	0	0	0	0	0	0
LGYRK	636.393	0.04	5.76	6.7	9.99			0	0	26.9	0	3.76	0	0	2300	0	0	0	0	0	0	3880	543	0	0	0	0	2270	0	0	8400	0	0	0	2040	0	0	0	4600	0	0	13700
PPVMVIIGGQ	1010.56	0.01	60	9.6	5.96			0	0	0	0	3380	0	0	0	0	0	0	0	0	0	0	3380	0	0	0	0	0	0	0	0	526	4720	0	0	309	0	0	0	0	0	0
Q(-17.03)ITSVAKVAM	1030.6	0.05	4.76	9.1	8.75		Pyro-glu from Q	0	0	0	275	205	0	835	0	0	156	0	0	3910	0	0	754	0	634	0	193	0	0	418	0	330	163	0	0	201	705	0	0	0	0	0
QSSPSNCTVYCGGVTS	795.341	0.01	60	11.5	5.51			740	0	3930	0	0	0	0	0	0	0	0	0	0	2100	0	0	0	0	0	0	3090	0	2430	0	0	1050	1580	0	0	0	3240	0	0	0	0
VGGSY	482.225	0.3	60	3	5.49			236	184	547	604	223	921	727	549	730	602	0	1450	0	0	0	0	0	0	0	0	189	0	142	0	0	0	0	146	140	0	0	128	0	0	278
AMKLK	590.37	0.04	60	9.8	10			46.1	0	0	0	0	2470	0	310	0	0	0	251	0	1710	1990	0	0	0	0	4240	0	0	0	0	0	0	0	0	5520	0	2430	0	0	0	0
ADAVWNKIQEENVIPREKTLRLLAEILREGN(+.98)Q(+.98)EVPFDVPELW	992.723	0.01	60	3.4	4.48		Deamidation (NQ)	0	0	0	5000	0	0	1150	0	0	0	0	0	629	0	0	0	0	0	0	0	0	0	0	0	0	0	0	0	0	0	0	0	0	0	0
LKAKGLSLGF	1033.64	0.06	3.41	9.6	10			394	0	392	24.1	603	282	70.3	518	0	2560	0	811	48.2	509	0	20.5	565	0	687	0	0	79.4	0	0	0	203	0	0	99.5	1.46	0	0	0	680	0
YQNIQPKKPEGTPQRILLKIFNPVLNVTAAN	877.005	0.04	60	3.1	10			0	0	0	0	0	0	0	0	0	0	0	0	1010	0	0	0	5800	0	0	0	0	0	0	0	0	0	2230	1400	0	0	2730	0	0	0	0
KHIKVN	738.474	0.01	60	10	10			0	0	0	0	0	0	0	0	0	0	0	1630	0	3350	0	0	1840	0	0	0	0	0	0	0	0	0	0	0	0	0	0	0	0	0	0
RPATGPIVLAP	1091.67	0.06	4.24	8.9	9.75			0	0	5140	0	231	0	0	0	0	47.3	0	516	0	442	454	0	0	0	1680	35.3	479	0	208	883	477	35.9	0	0	0	0	172	0	170	199	265
MADEAGSEADHEGTHSTKRGHA	459.603	0.21	60	2.3	5.28	sp|P02671|FIBA_HUMAN		0	0	0	2200	248	1470	283	0	0	1020	281	802	0	530	0	0	0	0	1940	685	949	637	342	0	0	0	0	0	0	0	0	243	0	235	0
QSIIPGIL	840.514	0.1	2.98	9.2	5.52			237	0	0	636	510	135	0	0	2240	725	15.1	0	0	1060	127	0	631	523	198	0	0	0	0	44.6	0	700	0	0	714	0	405	0	0	481	0
N(+.98)DNEEGFFS	530.197	0.03	60	1.6	3.57	sp|P02675|FIBB_HUMAN	Deamidation (NQ)	0	0	0	0	0	0	0	0	0	0	4850	0	0	0	0	0	1990	0	0	0	0	0	0	0	0	0	0	0	0	0	0	0	0	0	0
GGSTSYGTGSETESPRNPSSAGSWNSGS	902.048	0.01	60	6.6	4.53	sp|P02671|FIBA_HUMAN		0	0	0	0	0	0	0	0	0	5220	1620	0	0	0	0	0	0	0	0	0	0	0	0	0	0	0	0	0	0	0	0	0	0	0	0
GAGCEDVDECLEGLDDCHYN(+.98)Q(+.98)LCENTPGGHRCSCPRGYRMQG	1148.2	0.02	60	6.4	4.49		Deamidation (NQ)	0	2290	0	0	0	0	0	0	0	0	0	3090	1460	0	0	0	0	0	771	0	0	0	0	4100	0	0	0	0	0	0	0	0	0	0	0
SEGDGYSSENTSR	694.788	0.05	60	4.6	4.14			0	4970	0	0	0	1890	0	0	0	0	0	0	0	0	0	0	0	0	5850	0	0	5040	0	0	3730	0	0	0	0	0	0	0	2480	0	0
E(-18.01)Q(+.98)KNN(+.98)EKTDKSSLNLPEVDSDVAKPNQA	1028.18	0.02	60	4.9	4.59		Pyro-glu from E; Deamidation (NQ)	0	0	0	0	0	0	0	0	0	6870	0	0	0	0	0	0	0	0	0	0	0	0	0	0	0	0	0	0	0	0	0	0	0	0	0
HFDLFNFDPAPMASGQSQ(+.98)QSSHSAD	681.28	0.01	60	5.5	4.4		Deamidation (NQ)	0	2060	0	0	0	0	0	0	0	0	0	0	0	2340	0	2480	0	0	2370	0	0	0	0	0	1220	0	0	0	0	0	0	0	0	1340	0
EEHPVLLTEAPLNPK	562.972	0.06	60	8.8	4.75			0	0	0	0	0	0	0	0	0	0	3950	0	0	0	0	0	2940	0	0	0	7310	0	0	0	0	0	0	0	0	0	0	0	0	8860	8140
QLKLVGN	771.47	0.06	5.69	8.7	8.75			0	3470	1280	0	0	206	0	648	0	674	273	158	0	0	0	0	55.1	140	0	0	0	0	0	0	576	1530	0	887	4810	0	0	853	0	751	0
GLPGQ(+.98)EGLPGKDGDT	721.335	0.11	60	6.1	4.03		Deamidation (NQ)	0	0	0	0	0	0	0	0	0	5970	0	0	938	0	0	0	0	0	0	0	0	0	0	0	0	0	0	0	673	0	0	0	0	0	0
KPSSSSAVAAAAAAAAASSASSSWNTHQ	644.298	0.01	60	0	8.76			0	0	0	0	0	6910	0	0	0	0	0	0	0	0	0	0	0	0	0	0	0	0	0	0	0	0	0	0	0	0	0	0	0	0	0
GPIGPLGLPGHVGA	621.353	0.02	60	7.9	6.74			0	0	0	0	0	0	0	0	0	0	1860	0	0	0	0	0	0	5070	0	0	0	0	0	0	0	0	0	0	0	0	0	0	0	530	0
KKFAK	621.412	0.05	2.69	5.7	10.3	sp|Q8NET8|TRPV3_HUMAN		0	0	887	0	1330	1260	0	0	0	380	0	381	1460	0	0	0	1240	0	601	413	0	1450	0	0	682	0	0	0	0	748	864	928	0	0	1390
LSTKGQ(+.98)KKG	947.555	0.01	60	12.9	10.3		Deamidation (NQ)	0	0	0	0	0	0	0	0	0	0	0	0	0	0	0	0	0	6940	0	0	0	0	0	0	0	0	0	0	0	5910	0	0	0	0	0
HATPLPKK	891.547	0.06	3.29	6.2	10			715	0	1010	0	659	156	0	0	0	1020	0	0	0	1860	0	0	730	796	161	246	0	0	0	0	0	337	0	0	0	0	0	0	100	230	381
SM(+15.99)GSSLTTLQPVQ(+.98)FSQPLHPSYQ(+.98)QPLMPPVQ	861.152	0.02	60	12	6.46		Oxidation (M); Deamidation (NQ)	0	0	0	0	0	0	1580	0	0	3250	0	0	0	0	2120	0	0	0	0	0	0	0	0	0	0	0	0	0	0	0	0	0	0	0	12100
YVLLVVGGGPT	1074.64	0.12	2.69	8.2	5.52			0	0	1320	479	370	204	0	0	0	665	0	280	2760	145	580	161	0	0	641	0	436	757	1290	651	124	679	0	237	259	170	0	0	630	0	0
ALSVKEETKEDAEEKQ	459.232	0.25	60	2.2	4.42			447	786	0	0	0	0	425	0	0	0	477	0	1220	929	1380	625	675	0	0	433	684	0	0	0	0	303	741	750	586	1840	0	853	0	0	1340
HGLPVGVVLT	991.586	0.04	0.67	10.2	6.74			0	0	412	1150	163	381	0	319	448	1370	0	0	0	0	730	375	1620	0	0	0	271	45.9	1030	63.6	0	31.5	94.9	0	17.1	73.3	4810	0	0	660	2300
ELGGHLDQQVEEFR	552.936	0.01	60	0.4	4.4			0	0	0	0	0	0	0	0	0	0	0	0	0	0	0	6970	0	0	0	367	0	0	0	0	0	0	0	0	0	0	0	0	0	0	0
TVSQLIPG	814.489	0.02	60	11.4	5.19			2.55	399	0	0	0	0	0	0	3720	934	1830	85.8	0	0	0	0	0	0	0	0	0	0	0	0	0	0	427	0	108	7040	3260	0	0	0	0
AGDSGT	507.193	0.02	60	6.5	3.8			0	5670	1310	0	0	0	0	0	0	0	0	0	0	0	0	0	0	0	0	0	0	0	0	0	2590	0	0	0	0	8270	0	0	0	0	0
VCDHPDTAFTHAEENSCVTSNVSTN(+.98)EGQETN(+.98)QWEQEKSYLGEM(+15.99)TNSS	1051.24	0.01	1.87	11.3	4.09		Deamidation (NQ); Oxidation (M)	0	0	2060	0	0	0	0	2370	0	0	0	0	0	0	0	1180	1370	0	2010	4090	0	0	0	0	0	6160	0	0	0	0	0	0	4950	2220	0
LQGLPGVPG	837.497	0.02	5.25	13.4	5.52			0	0	3920	0	0	2430	0	0	0	185	0	0	260	0	0	0	0	232	0	2400	0	0	0	16300	0	210	0	465	4090	0	0	0	597	0	0
KPLPSEGSLAEADHTAHEEM(+15.99)EAHTTVKEAEDDNIS	761.741	0.04	60	11.6	4.34		Oxidation (M)	632	0	0	2620	0	0	1320	0	0	0	0	2460	0	0	0	0	0	0	0	0	8430	0	4600	4760	0	4900	6220	0	0	0	0	0	0	0	0
NMQHIM(+15.99)GP	472.211	0.05	60	4.9	6.74		Oxidation (M)	0	0	0	0	0	0	0	0	0	0	1760	0	2410	0	0	0	0	2870	2240	0	0	0	0	0	0	0	0	0	0	0	0	0	0	0	0
DEDDKGWPEN(+.98)Q(+.98)LDMSDYSSSYQDVAC	1000.39	0.06	60	3	3.5		Deamidation (NQ)	0	0	0	0	0	0	0	0	0	7060	0	0	0	0	0	0	0	0	0	0	0	0	0	0	0	0	0	0	0	0	0	0	0	0	0
Q(-17.03)AATECMCN(+.98)M	1085.33	0.01	60	8.7	4		Pyro-glu from Q; Deamidation (NQ)	0	0	0	0	1840	0	1200	0	0	0	0	0	0	0	2550	0	1480	0	602	0	0	0	0	1660	0	2030	0	0	1770	0	0	0	0	0	914
KLHLLPGASKSNKLRTKTLRNTRNPIW	1048.3	0.03	3.97	13.3	12.31			534	2310	428	0	0	0	1200	620	0	0	0	0	0	0	1980	0	0	0	0	291	3010	0	3560	6750	0	0	0	0	422	0	386	118	0	0	1540
HVVVAVSVAALVLTAAILLSLRSLKSNVRGI	793.249	0.03	3.94	10.6	12.01			0	1470	0	0	446	0	0	0	0	0	0	528	1840	2270	0	0	537	0	0	0	0	1220	0	0	0	796	0	0	0	0	0	0	0	0	0
EGMEEGEFSEAREDMAA	944.367	0.09	60	3.5	3.77	sp|P68366|TBA4A_HUMAN		0	0	0	0	0	0	0	0	0	0	0	0	1460	3450	2190	0	0	0	0	0	3100	0	0	4020	0	0	1580	704	966	1170	0	1910	0	0	6680
E(-18.01)ENVTGEQ(+.98)GGPDVVQ(+.98)PYAAYAPSGTPQ	915.753	0.01	60	10.2	3.5		Pyro-glu from E; Deamidation (NQ)	0	0	0	0	0	0	0	0	0	0	0	0	0	0	1490	5620	0	0	0	0	0	0	0	0	0	713	0	0	0	0	0	0	0	0	0
APKPKVNPFRPGDSEPPPAPGAQRAQ	678.113	0.01	60	4.9	9.99	sp|Q15942|ZYX_HUMAN		0	0	0	0	0	0	0	0	0	0	1760	0	0	0	0	0	5350	0	0	0	0	0	0	0	0	0	0	0	0	2830	0	0	0	0	2650
GFKRTK	368.737	0.09	60	4.8	11.17			0	0	0	0	1040	0	0	0	0	0	1050	0	2100	0	2920	0	0	0	0	0	2440	0	2350	0	0	0	0	382	0	0	0	0	0	1960	1570
KKSIVRLVRN(+.98)LS	707.439	0.08	60	6.9	12.02		Deamidation (NQ)	0	0	829	0	1980	0	0	1020	0	0	0	0	3290	0	0	0	0	0	0	1020	4390	0	0	0	0	2860	2800	0	0	0	0	0	0	2260	0
SAKPTKPAASDLPVPAEGVRNIK	587.334	0.03	60	1.1	9.7			0	0	0	0	0	0	0	0	0	0	0	0	0	0	0	0	7130	0	0	0	0	0	0	0	0	0	0	0	0	0	0	0	0	0	11100
PGRLAEVCAVLLRL	755.459	0.05	3.48	8.8	8.68			2190	0	0	0	0	0	0	0	0	2150	0	0	1780	0	0	0	0	1010	6750	1240	732	3000	14400	312	4470	0	3420	0	1610	2710	0	0	0	0	0
DAVVVGAGGAGLRAA	642.359	0.22	60	6.3	5.84			0	0	0	0	0	1960	0	0	0	0	0	0	0	0	2890	2280	0	0	0	1620	0	291000	0	0	11500	1010	0	84200	11700	0	0	0	0	4460	0
QVRFKTVTVLAQ(+.98)VHPIPPKKTGKIPRIFLKQK	925.063	0.02	5.68	11.4	12.05		Deamidation (NQ)	0	0	0	2870	339	0	0	0	3880	0	0	0	0	0	47.1	0	0	0	1270	1400	662	0	1380	0	263	2040	0	0	2240	0	0	89.7	0	0	3620
RPPKKPRH	1015.62	0.12	0.5	8	12.02			124	0	1270	0	330	546	571	561	0	359	0	1170	872	0	0	379	956	0	2670	277	277	0	108	0	1030	1350	569	187	58.4	227	909	564	0	195	87.7
TPGPKATVAASHLRV	502.288	0.01	60	5.8	11			0	0	0	0	0	0	0	0	0	0	0	0	0	0	0	0	2790	4350	0	0	0	0	0	0	0	0	0	0	0	0	0	0	0	0	0
ASQ(+.98)N(+.98)GAPALVKQ(+.98)EEGSGGPA	468.469	0.07	60	2.1	4.53		Deamidation (NQ)	0	0	0	0	697	0	0	3120	0	0	0	0	0	3360	0	0	0	0	0	0	6340	0	0	6450	0	2090	1680	1320	0	0	0	0	0	0	0
E(-18.01)EEELEEEDEAS	710.27	0.01	60	9.6	3.28		Pyro-glu from E	711	2170	707	0	0	0	0	1710	0	0	0	1410	470	0	0	0	0	0	154	0	0	0	0	0	0	0	0	0	0	0	51.9	0	0	0	0
N(+.98)TATTATSNMAGQ(+.98)HGCSN(+.98)PPCETH	608.979	0.02	60	1.9	5.98		Deamidation (NQ)	2530	0	1070	2030	0	0	0	0	0	0	0	0	0	0	0	507	0	1050	0	0	0	0	0	0	0	0	0	0	0	0	0	0	0	0	0
GAQGVPGPPGFQGEPGPQGEPGPP	553.513	0.06	60	4.8	3.79	sp|P25067|CO8A2_HUMAN		0	3470	0	0	0	0	0	0	0	0	0	0	2240	1480	0	0	0	0	0	0	0	0	0	0	0	0	0	0	0	0	0	0	760	0	0
VSLANTQPRGPPASSPAPAPKF	730.727	0.01	60	10.4	11	sp|Q15942|ZYX_HUMAN		0	1710	0	0	0	0	0	995	0	0	0	0	0	1630	0	0	0	2860	0	0	0	0	0	0	0	0	0	0	0	1700	0	687	0	0	4200
Q(-17.03)VIGKLIQKNHLSRTCLLIAVRTN	901.224	0.01	0.93	9.4	11.01		Pyro-glu from Q	0	1980	0	0	0	0	544	352	0	1940	0	0	0	0	0	2380	0	0	0	0	0	0	0	0	0	0	0	0	0	0	2630	0	1550	0	0
QPGMKPIKGITNLKVKDVQLPVITLNFVPGVGI	879.27	0.02	2.18	11	10			0	0	1060	0	0	0	3670	0	491	0	0	0	0	469	0	0	1510	0	0	0	0	0	0	0	0	0	2240	0	0	0	929	0	0	0	0
DDTQFVRFDSDAASPR	609.611	0.02	60	5.3	4.14			0	0	0	0	0	0	0	0	0	0	7230	0	0	0	0	0	0	0	0	0	0	0	0	0	0	0	0	0	0	0	0	1840	0	0	0
R(+42.01)PGRLLPLLARPAALTALLLLLLGHGGGGRWGARA	907.284	0.03	5.41	10.5	12.6		Acetylation (Protein N-term)	0	0	862	153	3170	0	0	2270	0	0	0	376	0	0	399	0	0	0	0	976	0	0	4100	834	1620	0	0	2300	0	933	0	0	0	0	0
LIKKRFAAG	502.315	0.01	60	8.9	11.17			0	0	1870	0	0	0	0	0	0	0	0	0	587	0	566	0	4210	0	0	0	0	418	0	0	0	0	0	0	0	0	0	0	0	0	0
Q(-17.03)VKTTLK	800.484	0.03	60	7.4	10		Pyro-glu from Q	518	538	1520	0	2920	0	0	0	462	1020	0	268	0	0	0	0	0	0	0	0	433	0	0	0	0	0	0	0	0	0	0	0	0	1010	0
AGAGGGGGGGGGGGGGGAGGGGGGMQ(+.98)PGSAAVTSGAYRGDPSSVKMVQSDFMQGAMAASNGGHM	1086.45	0.02	60	4.8	6.79		Deamidation (NQ)	0	0	0	0	0	0	0	2940	0	0	0	4310	0	0	0	0	0	0	0	0	0	0	0	0	0	0	0	0	0	0	0	0	0	0	0
AALSLLRSKQK	607.897	0.02	60	6.4	11.17			0	0	0	0	0	0	0	0	0	0	1450	0	0	0	0	0	0	5810	0	0	0	0	8950	3990	0	0	0	0	0	0	0	0	0	0	0
VPPGKK	625.397	0.11	2.79	8	10			441	287	278	347	276	0	517	0	1260	324	888	1540	0	0	0	1120	0	0	0	0	0	1330	0	0	0	0	0	35	0	0	0	477	0	2120	0
ALTDMPQM	453.712	0.02	60	11.8	3.8	sp|P02671|FIBA_HUMAN		0	0	0	0	0	0	0	0	0	7280	0	0	0	0	0	0	0	0	0	0	0	0	0	0	0	0	0	0	0	0	0	0	0	0	0
QHFQ(+.98)HHMQQ(+.98)HLQQQQQH	750.671	0.04	2.31	3.6	7.16		Deamidation (NQ)	0	2240	1470	0	651	0	992	666	0	0	0	179	0	0	642	0	0	445	0	495	0	0	0	0	292	0	0	0	0	0	0	0	0	3970	840
KDYEEVGIDSYEDEDEGEE	1125.44	0.06	60	5.4	3.48	sp|P68366|TBA4A_HUMAN		761	0	0	0	886	0	1790	0	0	0	1710	0	0	1310	840	0	0	0	0	0	0	0	0	0	0	768	0	0	0	0	932	0	1190	0	0
DECQ(+.98)DSPCAQ(+.98)ECVN(+.98)T	548.847	0.02	60	2.5	3.43		Deamidation (NQ)	0	0	0	3280	0	4030	0	0	0	0	0	0	0	0	0	0	0	0	0	0	1640	0	0	0	0	0	0	3820	2300	0	0	0	0	0	0
HVVNPSECSS	529.734	0.03	60	5.3	5.24			0	0	0	0	0	1160	0	0	0	0	0	0	6170	0	0	0	0	0	0	0	0	0	0	0	0	0	0	0	0	0	0	0	0	0	0
TFCLNFTI	479.737	0.01	60	6	5.18			0	0	3200	0	3350	0	782	0	0	0	0	0	0	0	0	0	0	0	0	0	0	0	0	0	0	0	0	0	0	0	0	0	0	0	0
CASDLEEYDAQ(+.98)EGHC	835.786	0.01	60	8	3.83		Deamidation (NQ)	0	5200	0	0	2170	0	0	0	0	0	0	0	0	0	0	0	0	0	13000	0	0	0	0	0	0	0	0	0	0	0	0	0	20400	0	0
KSRIPGR	813.496	0.05	5.04	10.6	12.01			180	286	0	0	0	0	0	0	0	0	679	136	1060	3840	722	250	219	0	0	0	0	3370	0	0	0	833	0	0	0	21.6	0	0	656	0	0
TKIAVVLT	422.78	0.05	60	3.4	8.41	sp|Q96P44|COLA1_HUMAN		0	0	0	0	0	0	0	0	0	0	0	0	1480	0	3450	2450	0	0	0	0	0	1840	0	0	0	5090	0	0	0	0	0	0	0	0	0
E(-18.01)QGDDGD	717.231	0.07	60	5.2	3.37		Pyro-glu from E	192	0	308	817	0	0	0	472	0	0	0	867	0	1640	0	552	603	1940	0	0	0	0	0	0	597	0	0	0	0	0	0	0	315	0	0
GESGNKGEPGSAGPQGPPGPSGE	1025.45	0.02	60	5	4.25			0	0	0	0	0	0	0	0	0	7400	0	0	0	0	0	0	0	0	0	0	0	0	0	0	0	0	0	0	0	0	747	0	0	0	0
KKAKKPAAAAGAKKAKSPKKAKAA	587.887	0.03	60	4.9	10.95			0	0	0	5730	1670	0	0	0	0	0	0	0	0	0	0	0	0	0	0	1130	0	0	0	0	0	0	0	0	0	1940	0	0	0	0	0
Q(-17.03)QPHHIPTSAPVYQ	793.385	0.01	3.15	11.8	6.92		Pyro-glu from Q	0	0	0	1590	0	0	0	0	0	0	1720	0	0	0	0	0	0	4090	0	0	0	0	1680	2310	0	0	0	0	0	0	0	0	0	2240	5380
GFVTLGRLAK	531.336	0.06	60	5.1	11			0	0	0	0	1510	0	0	0	0	0	0	0	0	0	3910	1980	0	0	1980	3920	0	0	0	3080	0	0	0	0	0	2380	0	0	2610	1710	0
IKGFPT	662.404	0.02	5.67	8.4	8.75			0	1180	0	0	2250	0	0	0	0	0	0	748	0	0	0	3230	0	0	0	0	0	0	0	0	0	0	0	0	0	16500	15000	0	0	0	0
KIFKIPPQAFKDLKKLQVIDLSN(+.98)NALITI	828.245	0.01	60	8.6	9.83		Deamidation (NQ)	0	0	0	0	0	0	0	0	0	5610	0	0	1820	0	0	0	0	0	1110	0	0	0	0	0	1730	0	0	0	707	0	0	0	0	0	0
EYLVVQIKK	1119.67	0.09	6.05	9.2	8.59			596	0	855	115	227	199	0	106	0	71	0	37	0	0	127	0	4080	1020	618	149	1250	886	352	850	0	197	571	484	429	4680	184	0	258	9.44	653
LRIKAPM	828.509	0.1	3.08	6.7	11			0	0	329	465	349	230	0	0	0	691	0	1820	2010	0	0	0	1540	0	168	1080	1070	0	2650	0	0	0	0	0	1040	0	543	1240	0	1120	111
HPGMPGGM(+15.99)GT	957.409	0.12	60	9.6	6.74		Oxidation (M)	1860	1410	0	0	1670	0	0	2220	0	0	0	0	0	280	0	0	0	0	0	0	0	0	0	0	0	0	0	0	0	0	0	0	0	0	0
QGKISSLKRSPALQILLTNTKVPRN(+.98)TR	1007.6	0.01	60	11.9	12.31		Deamidation (NQ)	0	0	2820	0	4620	0	0	0	0	0	0	0	0	0	0	0	0	0	7150	0	0	0	0	0	0	0	0	0	0	0	0	0	0	0	0
VNDN(+.98)EEGFFSARGHRPLD	515.991	0.01	60	0	4.75	sp|P02675|FIBB_HUMAN	Deamidation (NQ)	0	0	0	0	0	0	0	0	0	7450	0	0	0	0	0	0	0	0	0	0	0	0	0	0	0	0	0	0	0	0	0	0	0	0	0
RLGARRLQ	969.596	0.1	6.46	8.9	12.3			1440	0	1230	0	408	940	483	1770	0	462	411	213	0	0	0	0	0	106	575	396	0	0	0	283	24.5	773	175	0	635	919	0	0	442	0	258
PGSQ(+.98)GAPGLQ(+.98)GM(+15.99)PGERGAAGLPGP	726.351	0.02	5.22	7.3	6.43		Deamidation (NQ); Oxidation (M)	1750	0	0	0	1060	0	0	0	2280	0	0	0	0	0	0	0	2390	0	0	0	919	0	0	0	0	0	0	0	0	0	0	0	0	0	0
AKAQ(+.98)LIQIFFFRLNLLITLLGLLHGLVFLPVILS	959.582	0.02	5.16	9.5	11		Deamidation (NQ)	1100	0	3030	0	0	0	0	397	0	0	0	0	2200	0	757	0	0	0	0	0	517	827	0	0	903	7420	0	1470	0	3180	173	0	199	762	0
GVSNAAVVSAKL	1115.66	0.09	4.78	8	8.75			2780	0	273	394	594	0	0	0	0	439	0	0	0	0	324	449	509	1730	0	841	1250	1860	797	0	369	0	368	724	49	0	382	247	72.2	563	475
S(+42.01)ETAPAAPAAPAPAEKTPV	909.467	0.03	60	5.5	4.53		Acetylation (Protein N-term)	1160	0	0	0	0	0	0	1910	0	0	1560	966	0	0	1910	0	0	0	0	0	0	0	0	0	0	0	0	0	0	0	0	2700	0	0	0
YHLNAVRIQRAY	752.415	0.01	60	8.9	9.99			3990	0	0	0	0	3520	0	0	0	0	0	0	0	0	0	0	0	0	0	0	0	0	0	0	0	0	4710	0	0	0	0	0	0	0	0
CGAGCNSGGN(+.98)IEDSDTGGGTSC	491.427	0.09	60	5	3.49		Deamidation (NQ)	0	0	0	0	2570	0	2680	0	0	0	0	0	2260	0	0	0	0	0	6150	545	0	3170	0	1370	0	0	735	0	0	0	2010	0	2670	0	0
QQRKQM(+15.99)IAVKIKETKVM(+15.99)KLRKLAQQVAN	669.003	0.04	60	3.2	11.26		Oxidation (M)	0	0	0	0	0	0	1760	0	5750	0	0	0	0	0	0	0	0	0	6320	0	0	0	0	0	1710	4050	0	0	0	0	0	2010	0	0	6830
NLARLIIVK	520.34	0.08	60	11.7	11			0	420	0	1870	630	1390	0	997	1850	0	0	0	0	0	371	0	0	0	1150	2290	0	0	0	0	0	0	0	244	1710	1180	0	4150	0	641	3520
GGPVGTEKAAPGIKPSVRKPIQIKKSRP	966.25	0.02	60	6.4	11.22			4690	0	0	0	0	0	0	0	0	0	0	0	2840	0	0	0	0	0	0	243	0	6220	0	0	1390	8790	0	0	1280	0	0	0	2000	0	0
GSSGTGGTATWKPGSSGP	796.363	0.02	1.91	10.8	8.75	sp|P02671|FIBA_HUMAN		0	0	0	949	3570	0	1280	0	423	0	0	0	0	0	0	0	0	1310	0	0	0	0	845	0	0	0	2030	746	1240	0	293	0	0	0	0
HIHGESSSKKLQRSQ(+.98)RISDSDI	502.662	0.01	60	10.7	8.6		Deamidation (NQ)	0	0	0	0	0	0	0	0	0	0	0	0	4050	0	0	0	3490	0	0	0	0	1300	0	0	0	0	0	0	0	0	0	0	0	0	0
TKTAKDALSSVQESQVAQQA	697.361	0.02	60	14.1	5.73			0	0	0	0	0	0	0	0	0	0	5650	0	1890	0	0	0	0	0	0	0	0	0	0	0	0	5650	0	1550	0	0	0	0	0	0	0
G(+42.01)LWLLLPSLSLLLFEVARAGRAVVS	908.217	0.02	60	10.8	9.6		Acetylation (Protein N-term)	0	0	0	1520	775	0	3050	0	0	0	0	1480	0	0	0	0	728	0	0	741	0	0	1680	0	1460	1990	0	1160	84	0	169	652	0	2920	0
IHSDCAANQ	479.701	0.08	60	5.3	5.08			0	0	0	0	0	0	0	0	0	0	0	0	4600	0	0	2960	0	0	12700	0	0	5930	0	0	0	0	0	1370	339	2860	393	0	6030	0	0
AQ(+.98)M(+15.99)HAKNGGGSSSRSSPVSGPPAVCETLAVASASPM(+15.99)AAAAEGPQ	1039.47	0.01	60	17.3	6.79		Deamidation (NQ); Oxidation (M)	0	0	1910	5670	0	0	0	0	0	0	0	0	0	0	0	0	0	0	0	0	0	0	0	0	0	0	0	0	0	0	0	0	0	0	0
GSPEGGSDS	792.291	0.02	60	12.6	3.67			0	0	5780	0	0	0	0	0	0	0	0	0	0	1800	0	0	0	0	0	0	0	0	0	0	0	0	0	0	0	4470	0	633	0	0	0
E(-18.01)RLRKHGL	990.602	0.17	2.11	6.5	10.84		Pyro-glu from E	807	0	1340	0	575	0	744	136	0	572	0	338	144	0	227	1020	1210	476	1740	32.9	354	0	874	200	471	2710	199	142	653	813	268	1320	1020	1450	290
HIQSARALMVVAVLLGFVAMV	742.444	0.01	60	9.1	9.76			0	0	0	0	0	0	0	0	0	482	4970	0	0	2140	0	0	0	0	0	0	0	0	0	0	0	0	0	0	0	0	0	1940	0	0	0
PKNGN(+.98)TNSLN(+.98)LSSPNPM(+15.99)ENKGMPFGM	932.085	0.03	60	5.7	9.01		Deamidation (NQ); Oxidation (M)	0	0	0	156	2230	0	0	0	0	0	0	0	2370	0	2850	0	0	0	0	0	0	0	0	0	0	2340	4720	0	0	4850	0	0	0	0	0
AGSPGLPG	655.353	0.01	60	8.1	5.57			7620	0	0	0	0	0	0	0	0	0	0	0	0	0	0	0	0	0	0	0	0	0	0	0	0	0	0	0	0	0	5130	1590	0	0	10400
SLEDKTERELLESY	571.283	0.02	60	3.8	4.25			0	0	0	0	7630	0	0	0	0	0	0	0	0	0	0	0	0	0	0	2600	0	0	0	0	0	9210	0	0	4070	0	0	0	0	0	0
KLIRLF	395.278	0.22	60	4.6	11			0	0	403	0	0	1860	3340	0	0	0	0	0	0	0	937	1100	0	0	574	4270	455	0	0	657	808	4560	1920	803	2870	426	419	0	790	0	1040
LPVGP	482.307	0.06	60	3.4	5.52			0	1420	0	0	0	2410	1820	0	0	1990	0	0	0	0	0	0	0	0	429	5700	3790	6410	796	0	593	2330	0	0	0	0	0	0	3780	0	0
AKAAILGFTS	978.58	0.05	5.53	8.8	8.8			111	4580	658	0	0	0	0	158	0	1670	122	0	0	0	0	0	283	100	0	0	628	0	206	404	0	0	73.9	305	81.9	0	0	0	0	0	0
VIKAGFLVTARG	1231.74	0.08	60	7.5	11			0	0	0	0	4020	0	433	0	0	0	0	0	0	0	2760	469	0	0	208	1150	2800	166	0	447	0	1160	1200	0	693	3520	432	817	524	3440	1330
KKSTK	591.375	0.1	60	4.4	10.3	sp|O95714|HERC2_HUMAN		0	0	1080	0	1070	917	799	680	1520	0	0	1630	0	0	0	0	0	0	895	0	570	0	360	0	0	0	0	1320	0	0	0	627	1360	0	982
E(-18.01)NAAVQ(+.98)KMVENLKKQISELKIKNQQ	965.54	0.02	60	4.5	9.41		Pyro-glu from E; Deamidation (NQ)	0	2200	0	0	0	0	0	0	1930	0	0	0	0	0	0	0	0	3580	0	0	0	0	0	0	0	0	0	0	0	0	0	0	0	0	0
GALALAGLGF	889.532	0.03	5.35	10.5	5.52			0	0	292	0	7.06	0	0	0	0	290	0	500	0	1780	1920	261	2670	0	0	0	0	0	0	1250	0	0	0	535	173	0	0	0	0	307	0
GLVGNALVIFVILRYAKMKTATNIYLLNLAV	1131.34	0.02	5.16	10.8	10			0	0	0	0	0	1600	0	0	0	0	0	9.68	0	3010	235	0	0	2880	428	0	1110	0	2930	0	0	34.9	1310	538	0	608	0	0	2000	0	0
QQDFLAEAELL	638.815	0.01	60	8.3	3.57			0	0	593	0	0	0	0	0	0	0	0	0	3880	0	0	3270	0	0	11600	0	0	0	0	0	821	0	0	0	0	0	0	0	1420	0	0
Q(+.98)PLSLLLALALRN(+.98)TLVLQSRVGAGLGGLLT	1020.62	0.02	2.91	8.7	12		Deamidation (NQ)	94.2	0	229	0	628	0	2610	0	0	2780	0	0	0	0	1010	412	0	0	4070	0	0	3050	0	1630	0	0	0	0	0	0	0	0	0	0	1420
TTSHDT	661.278	0.02	60	10.6	5.05			0	0	0	0	0	2720	0	0	0	0	0	0	5050	0	0	0	0	0	0	0	1040	0	0	0	0	0	0	0	0	0	0	1740	0	0	0
HKLPSRV	836.515	0.04	60	8.2	11			0	0	0	0	0	0	1730	0	0	1230	4050	0	0	640	0	0	0	122	2920	0	0	285	307	0	0	166	0	608	0	308	0	0	582	0	0
VN(+.98)DN(+.98)EEGFFSA	615.742	0.01	60	4	3.57	sp|P02675|FIBB_HUMAN	Deamidation (NQ)	0	0	0	0	0	0	0	0	0	0	2510	0	3770	0	0	0	1500	0	0	0	0	0	0	0	0	0	0	0	0	0	0	0	0	0	0
Q(+.98)KPTVIATSTTS	617.824	0.09	60	6.3	8.75		Deamidation (NQ)	0	1710	0	0	0	0	0	1580	0	0	1780	0	1170	932	0	0	610	0	0	0	0	0	0	0	0	0	0	0	0	0	0	0	0	1280	0
EDECALMLLEHGTDPNIPDEYG	616.001	0.04	60	2.4	3.66			0	0	0	0	0	0	0	0	0	0	0	0	0	0	0	0	0	7810	0	0	0	0	0	6970	0	0	0	0	0	0	0	0	0	0	11900
ASNNQ(+.98)HGADSENGDMN(+.98)SS	918.828	0.08	60	10.7	4.02		Deamidation (NQ)	1280	1580	0	0	0	0	0	0	2190	0	726	0	1010	0	0	0	0	1030	0	0	0	0	0	0	0	0	0	0	0	0	0	0	0	0	0
NRGDSTFESKSYKMADEAGSEADHEGTH	612.063	0.02	60	3.1	4.69	sp|P02671|FIBA_HUMAN		0	0	0	0	0	1100	0	0	0	0	2020	0	0	4700	0	0	0	0	0	0	0	0	12400	12000	0	0	0	0	0	0	0	0	0	0	0
TDGGSLAGNEMIN(+.98)GEDEM(+15.99)EM(+15.99)YDDY	896.998	0.01	60	0	3.19		Deamidation (NQ); Oxidation (M)	0	0	0	0	0	0	0	7840	0	0	0	0	0	0	0	0	0	0	0	0	0	0	0	0	0	0	0	0	0	0	0	0	0	0	0
QDRQ(+.98)CVLSTLAQLLLDKDCTVLVGRQ	729.881	0.01	60	12.9	6.03		Deamidation (NQ)	0	0	0	0	0	0	0	0	0	0	0	0	4930	0	0	0	0	2910	0	0	0	0	0	0	0	0	0	0	0	0	1870	0	0	0	14300
TATVAFVLI	934.573	0.08	2.35	7.7	5.19			0	763	0	384	2190	682	390	681	0	1.61	0	111	0	0	155	333	1260	901	1560	1090	412	0	0	0	0	252	0	0	0	4.06	0	304	312	170	0
LAPIQVVGQ(+.98)	925.54	0.02	2.54	9	5.52		Deamidation (NQ)	0	0	0	0	3960	0	2260	0	0	0	0	0	0	0	1280	0	0	355	3720	0	0	782	1930	0	0	0	0	0	0	0	0	121	719	151	0
KGISSSSLKEKKLSPGDRV	1008.58	0.02	60	5.7	10			0	0	3120	0	873	0	0	0	0	0	3870	0	0	0	0	0	0	0	7070	587	0	0	0	0	275	0	0	0	0	0	0	0	0	0	0
EPLGRQLTSGP	577.811	0.22	60	3.2	6.1			0	0	0	0	0	0	0	0	0	7870	0	0	0	0	0	0	0	0	0	0	0	0	0	0	0	0	0	0	0	0	0	0	0	0	0
PPGREGLLVGLKNGQILKIFVDN(+.98)LFAIVLLKQATAVR	1001.34	0.01	60	8.6	10.28		Deamidation (NQ)	0	0	0	5800	0	2070	0	0	0	0	0	0	0	0	0	0	0	0	3810	0	0	3960	0	1300	0	0	0	0	0	0	0	0	0	0	0
TLRKDKTLLRDEKKMEKL	562.081	0.06	60	5.1	9.82			0	0	0	0	0	0	0	0	0	0	0	0	6660	1210	0	0	0	0	0	0	2970	0	0	0	0	0	0	779	695	3720	0	1440	2370	0	0
M(+15.99)ELAEIEAI	517.755	0.04	60	12.4	3.67		Oxidation (M)	0	0	0	0	0	0	0	0	0	693	0	0	0	0	0	0	0	7180	0	0	0	0	0	0	0	0	0	0	0	0	0	338	0	0	0
PPRKPASNLVAVLLGLLVPVVV	1126.18	0.01	4.29	5.8	11.01			0	0	0	0	0	469	192	0	0	0	0	3250	341	0	0	3630	0	0	1950	0	0	0	260	8230	212	0	0	0	3380	0	0	0	0	0	555
SLAELGGHLDQQVEEFRR	521.767	0.04	60	2.7	4.83			0	0	0	0	0	0	0	0	0	7900	0	0	0	0	0	0	0	0	0	0	0	0	0	0	0	0	0	0	0	0	0	0	0	0	0
KERELEEARKKLAQIRQ	532.057	0.01	60	5.9	9.69			0	0	0	0	0	0	0	0	0	0	0	0	4790	0	0	0	3110	0	1190	0	2640	0	1330	0	0	0	0	0	735	4750	0	0	1540	0	0
HLGPVV	621.376	0.04	60	4.6	6.74			0	0	0	0	1270	0	3250	593	0	0	0	0	912	1320	0	0	563	0	619	0	273	0	0	0	0	0	0	0	0	0	326	438	0	306	0
G(+42.01)GGGVGAAGEDPGPGPAPPPEGAQ(+.98)EA	561.254	0.09	60	6.5	3.5		Acetylation (Protein N-term); Deamidation (NQ)	0	0	0	0	0	0	0	0	0	0	2430	0	0	0	0	0	5480	0	0	0	0	0	9680	8000	0	0	0	0	0	0	0	0	0	5190	0
GLPGPPDVPDH	550.771	0.01	60	4.1	4.2			0	0	0	0	0	0	0	0	0	0	2250	0	0	2670	0	0	2990	0	0	0	2890	0	17900	54300	0	1170	0	0	0	0	0	0	0	0	1560
E(-18.01)RGAAGIK	783.459	0.02	5.29	11.4	8.85		Pyro-glu from E	0	0	0	0	1280	0	0	0	0	132	0	0	0	0	0	6520	0	0	6130	1480	0	0	0	0	0	0	143	0	229	0	0	0	0	0	0
QTIQ(+.98)IPHCPQGWDSLWIGYSFMM(+15.99)HTSAGAEGSGQALASP	836.173	0.01	60	14.3	5.15		Deamidation (NQ); Oxidation (M)	2750	0	0	0	3740	0	1450	0	0	0	0	0	0	0	0	0	0	0	0	0	3180	0	0	1580	0	0	0	0	0	0	0	0	0	0	0
SKTGAVFIIE	1064.64	0.08	5.5	8.6	5.72			2130	0	0	472	178	149	0	0	0	80.2	0	582	1460	0	1540	0	1350	0	188	163	197	388	2570	1590	545	0	0	2470	0	0	1120	476	53.7	624	0
HCCACGAVM	894.299	0.01	4.4	7.4	6.71			0	0	0	0	2110	0	0	0	2870	0	33.2	0	0	0	0	1240	1700	0	1070	0	0	0	0	0	0	0	0	0	0	0	637	0	0	0	0
PPAAAAAGPPAT	496.265	0.02	60	6.4	5.96			0	0	0	0	0	0	1020	0	0	0	0	0	0	3250	2410	0	1280	0	0	1260	0	0	1810	0	0	0	0	0	0	0	720	0	0	0	0
Q(-17.03)GMM(+15.99)AAMLSHAYGPGG	789.328	0.05	60	6.3	6.74		Pyro-glu from Q; Oxidation (M)	0	0	0	0	0	0	0	0	0	3920	0	0	0	0	0	0	0	4040	0	0	0	0	6860	1450	0	0	0	0	0	0	0	0	628	0	0
RTATAELGWTANPASGWEEV	716.015	0.01	60	4.2	4.25			0	0	0	0	0	0	0	0	0	0	0	0	0	0	2170	5800	0	0	0	0	0	0	567	0	0	17000	2900	0	0	2740	0	0	0	0	1520
SKTKRHLV	968.598	0.06	3.38	6.7	11.17			42.6	0	860	0	2220	14.9	0	329	968	995	0	1350	0	0	491	64.2	659	0	0	0	0	0	195	35.5	76.3	0	385	0	0	0	0	585	19.6	235	0
HKLRPGIGEKPTV	716.428	0.02	60	9.6	9.99			0	0	0	0	0	0	0	0	6630	0	0	0	0	0	0	0	0	1370	0	0	0	0	0	0	0	0	0	4640	0	1500	0	871	0	0	0
VTQLHATDADIGEN(+.98)AKIHFSFS	1201.6	0.02	60	1.7	5.21		Deamidation (NQ)	0	0	0	0	0	0	0	0	0	0	4290	0	0	0	0	0	3730	0	0	0	0	0	0	0	0	0	0	0	0	0	0	0	0	0	0
Q(-17.03)LHSLQGRRSSRAPAGSSRGPSPGLRPALPSRLARASRGV	1033.34	0.01	60	0	12.85		Pyro-glu from Q	8020	0	0	0	0	0	0	0	0	0	0	0	0	0	0	0	0	0	0	0	0	0	0	0	0	0	0	0	0	0	0	0	0	0	0
GGSTSYGTGSETESPRNPSSAGSWNSGSSGPG	1001.43	0.01	60	12.9	4.53	sp|P02671|FIBA_HUMAN		0	0	0	0	0	0	0	0	0	8020	0	0	0	0	0	0	0	0	700	0	0	0	0	0	0	0	0	0	0	0	0	0	0	0	0
GLPSLAPLV	866.53	0.09	3.19	7.7	5.52			525	654	627	0	0	0	0	0	339	1080	0	1320	0	696	440	319	1580	448	360	0	0	0	101	2290	0	0	989	0	0	0	0	112	731	0	0
GLQLLPGGG	811.472	0.01	2.55	10.9	5.52			0	0	0	5640	0	0	0	0	1250	0	0	0	0	0	0	0	1150	0	0	0	2130	1110	0	0	0	0	0	0	0	0	0	0	0	0	0
HVVRAGAIFVPIHLVKERLFPRLPPA	733.948	0.01	0.95	10.6	11.71			1870	0	0	0	0	0	0	0	0	3620	0	0	0	2560	0	0	0	0	3000	0	0	0	2530	0	0	0	2340	0	0	0	0	0	0	0	0
VTEPISAESGEQVERVNEPSILEM(+15.99)SR	968.146	0.07	60	5.9	4.21		Oxidation (M)	0	0	0	0	0	0	0	0	0	8060	0	0	0	0	0	0	0	0	0	0	0	0	0	0	0	0	0	0	0	0	0	0	0	0	0
SDDAGDYEQ(+.98)LFS	674.257	0.01	60	5.6	3.37		Deamidation (NQ)	0	0	0	1420	0	0	0	0	0	0	3610	0	1740	0	0	0	0	1300	0	0	0	0	0	0	1450	0	0	0	0	749	0	0	0	0	0
SDGNSIYFHGN(+.98)EGSEFNFATTRDVDLSTEDIQ(+.98)EQWSEEFESQPTGWD	1081.46	0.05	60	11.6	3.66		Deamidation (NQ)	0	0	0	0	0	3570	0	4500	0	0	0	0	0	0	0	0	0	0	0	0	0	0	0	0	0	0	4020	2340	0	0	0	0	0	0	0
Q(-17.03)EKPSSPSPMPSSTPSPSLNLG	736.684	0.02	60	9.2	6		Pyro-glu from Q	0	0	0	0	0	0	0	0	0	0	0	0	0	5570	2500	0	0	0	0	0	4650	0	6480	0	0	5530	339	0	6290	9020	0	0	0	0	9840
YQKILGLQ	962.576	0.12	3.06	8.3	8.59			695	0	91.6	0	471	242	678	0	956	297	0	135	2050	0	42.7	1560	855	0	4770	340	0	1110	0	403	1610	186	829	320	940	1330	119	0	937	0	831
LGRRGSPLLS	1055.64	0.09	3.88	7.2	12			0	0	1410	1050	1100	655	530	0	0	31	0	474	0	1290	232	19	1290	0	1480	0	639	293	0	30.4	160	465	345	64.6	372	0	233	786	0	0	670
RPIGPKPTKAGKDKSKASLEK	746.118	0.01	2	6.5	10.3			0	87.8	0	419	568	0	0	0	323	0	2750	774	0	0	1390	0	1770	0	0	0	0	0	0	0	0	0	0	0	0	4710	0	0	0	0	0
AVTSCQ	608.271	0.01	60	7.9	5.56			105	0	0	0	0	0	0	0	0	0	0	0	108	0	0	0	7870	0	0	0	120	0	0	0	0	0	0	0	0	6340	0	0	0	0	0
VLNRHLTVLRVVQ(+.98)LQPLQQVN(+.98)LIL	936.903	0.03	2.34	8.4	12		Deamidation (NQ)	1670	0	0	0	0	690	551	0	1420	72.7	0	0	1670	0	0	0	1770	241	6820	809	0	0	0	8290	525	0	0	0	0	0	1460	0	0	546	5580
AKAVLEEDEEVTEEAE	895.906	0.05	60	7	3.72			0	0	0	0	0	0	0	2440	0	0	0	0	0	0	2040	1630	1980	0	0	542	0	0	0	0	0	0	3460	0	1280	1790	0	0	1000	0	3250
KGILLTGSKTEVLKAV	829.01	0.04	60	6.5	9.7			0	0	0	0	0	0	843	0	0	1580	0	1370	782	0	2360	0	0	1160	4210	0	0	1530	0	0	0	0	0	0	0	0	0	0	0	1180	0
RRNQPVVVL	1080.66	0.13	2.04	8.1	12			26	0	0	0	596	1160	374	0	1160	95.4	0	509	0	72.6	904	63.5	397	2750	1630	667	912	94.3	224	4370	171	764	41.2	0	1200	0	1390	1440	317	1160	0
TFGLKGLVKA	1033.62	0.13	2.17	8.6	10			1010	0	138	467	630	1330	658	1970	0	641	0	130	0	54	161	782	138	0	132	90.4	0	463	553	40.8	107	0	128	85.8	517	1380	0	59.3	340	1730	0
MELERPGGNEITRGGSTSYGTGSETESPRNPSSAGSWN	989.696	0.03	60	6.5	4.65	sp|P02671|FIBA_HUMAN		0	0	0	3800	0	1280	0	0	0	0	0	3030	0	0	0	0	0	0	0	0	0	0	0	0	0	0	0	0	0	0	0	0	0	0	0
LNPGPKGQ(+.98)PESL	1237.62	0.02	60	2.5	6		Deamidation (NQ)	0	0	0	0	0	0	0	0	0	0	0	0	0	0	0	0	4420	3700	0	0	0	0	0	0	0	0	0	0	0	0	0	0	0	0	0
HGLPVPLT	833.504	0.07	6.02	7.2	6.74			343	0	0	1870	0	0	545	0	2800	627	249	1500	0	0	0	0	190	0	718	2030	0	0	0	0	0	144	0	199	0	0	0	327	2580	2510	289
KKRAYQ	397.241	0.05	60	3.5	10.29			0	1560	0	0	0	0	0	0	0	0	0	0	0	3440	1640	0	1490	0	0	0	0	0	0	2460	0	0	0	0	0	0	0	0	0	0	0
Q(-17.03)PAQVALAKPPVVSVPAAVVSSPGVTTLPMNVAGISVAIGQPQ(+.98)KAAGQTVVAQPVH	1084.24	0.02	60	15.8	10		Pyro-glu from Q; Deamidation (NQ)	0	0	0	0	5160	0	0	0	0	0	0	0	0	0	0	2970	0	0	3270	1100	5360	0	944	0	0	3890	0	0	0	1520	0	0	0	0	0
VRSRLLAC	917.546	0.01	60	9.4	10.35			0	7020	0	0	0	0	822	0	0	293	0	0	0	0	0	0	0	0	0	0	0	0	0	483	0	210	1490	0	0	59.6	0	177	0	0	0
TAKDALSSVQESQVAQQA	930.966	0.01	60	6.7	4.37			0	0	0	0	0	0	0	0	0	6020	2120	0	0	0	0	0	0	0	0	0	0	0	4280	1720	0	0	0	0	0	0	0	0	0	0	0
KKINRNTHALGLAKKNKRNLKWHKLE	1046.96	0.01	60	7.9	11.3			0	0	0	0	0	0	1280	0	0	0	0	0	0	0	0	1470	0	5390	0	1040	0	1580	0	1540	0	0	1410	1060	0	0	0	1020	1580	0	0
KTSVCKLVLRIGEIER	922.559	0.01	5.27	10.5	9.31			0	0	0	0	897	0	0	125	0	0	0	0	3820	0	265	0	3050	0	1870	0	0	355	324	117	0	2070	0	0	0	0	0	0	0	0	0
YAATVINTAVH	1159.6	0.01	60	3.1	6.74			0	0	940	0	0	0	0	0	0	0	0	0	0	0	0	0	7220	0	0	0	0	0	0	0	0	0	0	0	0	0	0	0	0	0	0
EPAAAATVQR	1013.54	0.02	60	0.4	6.1			0	0	0	0	0	0	0	0	8160	0	0	0	0	0	0	0	0	0	2000	0	0	0	0	0	8990	0	0	0	0	0	0	0	0	0	0
LKPLVGESRSIAVKAVSSNIS	719.111	0.03	60	7.7	9.99			0	0	0	0	0	0	0	1740	0	2250	0	0	0	2280	1220	375	0	301	0	0	198	0	0	0	2920	0	0	0	0	0	0	8030	0	0	0
HGFAEFLIFLLPLINVQKLKAKLS	913.891	0.01	60	12.3	9.7			0	0	0	0	0	0	0	0	0	0	0	0	0	0	0	8180	0	0	1110	326	0	0	0	0	1020	0	491	0	0	3960	0	0	878	0	0
EEIFPSPPPPPEEEGGPEAPIPPPPQPREKVS	1143.24	0.02	60	3.7	4.12	sp|Q15942|ZYX_HUMAN		0	0	0	0	0	0	5190	0	0	0	0	0	0	0	2990	0	0	0	0	2860	0	0	0	0	0	0	5350	0	0	0	0	0	1290	0	0
YEGSYALTSEEAERSD	903.881	0.03	60	4.2	3.91			0	3140	0	0	0	0	950	0	1980	0	0	0	0	0	0	0	2120	0	0	615	0	855	0	0	0	0	0	0	920	0	430	0	0	0	2750
Q(+.98)ELLGPSPQRDPQAV	818.421	0.02	60	1.8	4.37		Deamidation (NQ)	0	0	0	0	0	0	0	0	0	2850	0	0	0	0	0	0	0	5350	0	0	0	0	0	0	0	0	0	0	0	0	0	0	0	0	0
IPAALSPGPGPIPAPIPGPAQIP	1064.59	0.01	60	6.3	5.52	sp|Q8N7U7|TPRX1_HUMAN		0	0	0	0	0	0	0	0	0	5780	0	2430	0	0	0	0	0	0	0	0	0	9290	8170	0	0	0	0	0	0	0	0	0	0	0	5840
NAKKM(+15.99)WPQYCQHDNDTTQESSASNQASSPENDVPDSILSPQGQNGD	1007.82	0.01	60	12	4.09	sp|Q8WXH0|SYNE2_HUMAN	Oxidation (M)	0	0	0	0	0	0	1410	0	3850	0	0	0	0	0	2960	0	0	0	0	679	3330	0	0	0	0	0	0	0	0	0	0	0	0	0	2840
NRGDSTFESKSYKMA	574.267	0.07	60	5.5	8.5	sp|P02671|FIBA_HUMAN		0	0	1460	0	0	0	1330	0	0	0	0	0	2700	2730	0	0	0	0	3720	441	0	2020	0	0	862	0	0	0	1820	1860	624	3240	0	0	0
KPSN(+.98)N(+.98)VSVIQVTTRTRKSVTEVKEMDVHT	657.949	0.03	60	3.8	9.7		Deamidation (NQ)	0	0	0	0	0	0	0	0	0	0	2250	0	1610	0	0	0	0	4360	0	0	3910	0	7500	0	0	0	0	0	0	0	0	1190	0	0	9740
SGQVIPLIV	925.569	0.18	1.41	8.4	5.24			0	476	7.99	990	410	0	179	149	1320	153	2190	0	758	397	743	257	87.7	106	872	276	612	849	464	0	0	350	581	394	0	0	199	351	191	487	393
GFIKSIRGV	976.579	0.03	5	10.9	11			162	0	175	0	86.5	379	241	0	0	311	0	0	0	0	0	6870	0	0	0	0	0	0	0	959	21	0	0	122	757	0	0	667	0	719	0
PLLLAPLP	417.288	0.17	60	8	5.96			0	0	0	0	93.5	676	4140	0	0	0	0	575	0	415	1150	1190	0	0	521	5170	642	483	0	636	948	5480	2190	990	909	510	385	0	957	0	1280
TRSGGLGQ	775.419	0.01	60	5.7	9.41			0	0	8250	0	0	0	0	0	0	0	0	0	0	0	0	0	0	0	0	0	0	0	0	0	0	0	0	0	0	0	0	0	0	0	0
QLALHFLGGSMNSMAGGA	881.407	0.01	60	7.2	6.74			0	0	0	0	0	0	0	0	0	0	0	0	0	4630	0	0	0	3620	0	0	0	0	0	0	0	0	0	0	0	0	0	0	0	0	0
GVGLAPGVGVAPGVGVAPG	765.927	0.01	60	8	5.52			0	3310	0	4940	0	0	0	0	0	0	0	0	0	0	0	0	0	0	0	0	0	0	0	0	2700	0	0	0	0	1850	0	0	0	0	0
QLINKKEIFIEKLKERSSKLQEELD	1020.26	0.01	60	10.3	6.36			6720	0	287	0	1250	0	0	0	0	0	0	0	0	0	0	0	0	0	0	0	0	0	745	0	0	5910	0	0	27.7	0	0	0	0	0	214
RGGGAGGCGGPGGGGRLGGDSPGSQ(+.98)A	525.736	0.04	60	6.7	8.25		Deamidation (NQ)	0	0	0	0	0	0	0	0	0	1540	0	0	0	0	0	0	0	6720	0	0	0	0	0	0	0	0	0	0	0	0	0	0	0	0	0
HVLLAPIT	432.274	0.01	60	2.1	6.74			0	1410	0	0	2810	0	0	0	0	0	0	0	0	0	0	0	4040	0	0	0	0	0	0	0	0	0	0	0	0	0	0	0	0	0	0
E(-18.01)GAIIGPILL	977.597	0.17	3.09	7.7	4		Pyro-glu from E	0	443	302	590	240	779	329	0	592	53.2	245	0	1130	0	838	1540	710	469	3140	787	1360	284	1780	746	1620	0	267	161	65.4	288	0	0	1140	0	1050
KPECDCGPLKDH	671.301	0.01	60	5.1	5.38			5130	0	0	605	1290	1250	0	0	0	0	0	0	0	0	0	0	0	0	0	0	0	1410	0	0	0	0	0	1560	1540	0	0	0	0	0	0
RGDSTFESKSYKMADEAGSEADHEGTHST	626.872	0.05	60	3.9	4.69	sp|P02671|FIBA_HUMAN		0	0	0	0	0	0	0	0	0	0	0	0	0	8280	0	0	0	0	0	0	4330	0	0	4500	0	0	0	0	0	0	0	0	0	0	0
FSVLFLVVW	1109.66	0.14	3.88	7.9	5.52			785	0	706	151	0	385	0	2640	0	474	0	0	0	0	1430	465	0	1250	17800	102	896	275	977	219	863	0	872	462	2360	2450	972	291	699	1130	425
SSSYSKQFTSSTSYNRGDSTFESKSYKMADEAGSEADHEGT	892.78	0.03	60	10.6	4.7	sp|P02671|FIBA_HUMAN		0	0	684	3820	0	0	0	0	0	0	0	0	0	3790	0	0	0	0	0	2180	0	2790	0	0	1040	0	0	0	777	0	0	0	0	0	0
TSSGIYTGNN(+.98)SLTNSSGFNSSQ(+.98)QDYPS	704.552	0.04	60	8.9	3.8		Deamidation (NQ)	0	0	0	0	0	0	0	0	0	0	0	0	0	0	6530	1770	0	0	0	0	0	0	5450	0	0	0	0	1270	1430	0	2470	0	0	4070	3490
Q(-17.03)GLPGPT	652.332	0.01	60	10.8	5.52		Pyro-glu from Q	0	0	0	0	0	0	0	0	0	1620	2760	1040	0	2880	0	0	0	0	0	0	0	0	0	17400	0	0	0	0	0	0	0	0	0	0	1020
LPAAGVVL	739.472	0.11	60	4.5	5.52			0	192	1090	1370	1010	0	0	0	0	0	0	0	0	1460	1550	1630	0	0	0	1480	0	1530	972	1560	0	0	0	0	1020	0	0	0	1060	0	0
KSEIATDKLSFPLKNITRKNIAKM	916.199	0.01	60	12.1	10.17			0	0	997	0	0	0	566	0	0	0	0	1800	0	0	0	0	4940	0	0	0	0	0	0	0	0	0	0	0	0	0	0	0	0	0	0
FPCVVYINEVRVIPPGVRA	710.057	0.02	60	11.3	8.22			0	0	0	7220	0	1100	0	0	0	0	0	0	0	0	0	0	0	0	0	475	0	13800	0	0	0	6750	0	7840	0	0	0	8970	0	0	0
KEAKSETSGPQIKELTDEEAERLQ	679.844	0.03	60	8.5	4.55			0	0	0	0	0	0	0	1130	0	0	1290	0	1550	0	1180	0	2270	911	0	0	925	521	0	0	0	0	0	0	0	1290	0	0	0	0	0
IGLCYLLIVGKMRAVALRA	1030.63	0.01	60	10.3	10.05			0	260	0	1020	0	629	0	0	0	0	0	0	0	0	0	0	6430	0	0	0	0	0	0	11500	1460	0	0	1220	0	0	0	0	603	0	0
KNAEELKARISASAEELRQ	536.543	0.02	60	0	6.29			0	0	0	0	0	0	0	0	0	8350	0	0	0	0	0	0	0	0	0	0	0	0	0	0	0	0	0	0	0	0	0	0	0	0	0
AVEGPEELSRSSSESKLPSSGSGKRLSGVSSVDSAFSSRGS	817.811	0.01	60	4.1	6.36			0	8350	0	0	0	0	0	0	0	0	0	0	0	0	0	0	0	0	0	0	0	0	0	0	0	0	0	0	0	0	0	0	0	0	0
L(+42.01)WLLSWLLALAGGVILLCSG	1070.64	0.03	2.88	8.7	5.52		Acetylation (Protein N-term)	0	5390	355	0	0	0	0	1000	0	271	0	0	0	797	542	0	0	0	1190	0	561	0	2860	253	0	0	868	532	2970	814	0	0	2660	53.1	0
EDGQ(+.98)WAEQ(+.98)PVT	631.251	0.01	60	5.7	3.57		Deamidation (NQ)	0	0	0	0	5480	0	0	0	0	0	0	0	0	0	0	2880	0	0	1130	0	0	0	0	0	0	0	0	13300	0	698	0	0	0	0	0
HLRGLVS	781.467	0.04	4.87	10.9	9.76			0	0	0	2170	981	0	0	0	2440	0	1370	0	302	0	0	1100	0	0	4340	0	0	0	0	0	0	0	0	646	2370	171	81.1	0	0	0	0
GHALRKKVQF	1183.73	0.02	5.12	7.1	11.17			0	0	0	0	0	1060	1760	0	0	512	2860	0	0	0	2180	0	0	0	350	285	213	0	0	68.5	0	501	0	0	0	0	0	2710	72.8	0	0
ETGQ(+.98)LGSLGGV	509.756	0.03	60	3.4	4		Deamidation (NQ)	0	0	0	0	0	0	793	0	0	0	92.8	1740	1270	0	0	0	0	4490	0	0	0	0	0	0	409	0	0	0	940	0	0	1250	0	0	0
RCQ(+.98)KNLSLHTSVRILYLFLALLLVAVAVLASLVFRK	1018.12	0.01	60	8.1	11.01		Deamidation (NQ)	0	0	0	0	0	0	146	0	5380	0	2860	0	0	0	0	0	0	0	0	1670	0	0	0	807	2390	0	0	0	0	0	0	0	1620	0	0
KDEEEMSGEEDEEQET	479.182	0.13	60	2.2	3.59			0	0	0	0	0	0	0	1700	0	0	0	0	0	1780	0	0	3030	1880	0	0	1880	0	0	3570	0	0	491	0	0	0	0	1320	0	1960	2500
PKGAPTTPAATPPSPKGGLATPPPK	779.436	0.01	60	7.2	10.31			0	0	0	0	0	0	1080	0	0	7320	0	0	0	0	0	0	0	0	0	5460	0	0	3450	2970	0	0	0	0	0	7810	0	282	2160	457	0
Q(-17.03)VYSDYESNPQ	656.758	0.07	60	5	3.67		Pyro-glu from Q	1170	0	0	0	0	0	783	0	0	0	0	0	0	0	0	6450	0	0	20000	2440	0	0	0	0	6730	0	0	0	0	8830	0	0	9800	0	0
KAPVLL	640.427	0.03	60	6.7	8.75			0	0	0	0	1290	0	0	0	0	0	0	1050	0	0	4200	0	1890	0	0	0	0	2070	0	0	0	0	0	0	0	0	0	0	0	0	0
VCEQ(+.98)EPGGPAGS	377.824	0.01	60	5.3	3.79		Deamidation (NQ)	0	0	0	0	0	0	0	0	0	0	0	0	8450	0	0	0	0	0	0	0	0	0	0	0	0	0	0	2540	0	0	0	0	0	0	0
HLVKANQNLVPPGKKLSALQA	1113.67	0.01	60	8.4	10.3			0	0	6370	2090	0	0	0	0	0	0	0	0	0	0	0	0	0	0	0	0	0	0	0	1370	0	0	0	0	6090	980	0	0	825	0	0
WGLRGALAAVALLSALN	848.503	0.01	5.36	9.6	9.75			325	0	0	0	208	0	361	0	0	0	0	0	0	0	7570	0	0	0	0	0	0	0	1610	0	0	0	0	347	0	370	0	0	0	0	0
KKLLLLVC	465.309	0.02	60	11.6	9.31			0	0	0	0	0	1170	769	0	0	0	0	380	0	2430	0	3770	0	0	2840	142	0	0	0	868	626	704	0	0	864	0	968	650	0	632	0
Q(+.98)CGCYHNGVYYEPEQTVLIDNCRQQCTCHAGKGMVCQEHSCKPGQVCQ(+.98)PSGGILS	1198.52	0.01	60	15.1	6.27		Deamidation (NQ)	0	0	0	0	0	0	1180	0	0	0	0	0	0	0	0	3420	0	3920	0	0	0	0	0	0	0	963	0	0	0	0	0	0	0	0	0
STQTMVTQQTIKTESSSTN(+.98)GAVVKDETSLTT	655.721	0.07	60	5.2	4.68		Deamidation (NQ)	0	0	0	0	5890	0	0	0	0	0	0	0	0	2630	0	0	0	0	0	0	11400	0	0	0	0	10300	6020	0	0	0	0	0	0	0	0
IFKSLGLK	453.3	0.03	60	6.5	10			0	0	0	0	0	3300	2100	0	0	0	0	0	0	1570	1560	0	0	0	0	2470	0	0	0	1330	0	0	853	0	2320	1050	0	0	0	0	0
AIFNGLTLLILG	622.882	0.02	60	10.9	5.57			0	0	0	0	0	0	0	0	0	0	8560	0	0	0	0	0	0	0	0	0	0	0	0	0	0	0	0	0	0	0	0	4440	0	11600	0
VEILKAVPP	483.313	0.04	60	5.9	5.97			0	0	0	0	0	0	0	0	0	0	0	0	8560	0	0	0	0	0	14000	340	0	0	524	0	0	5160	466	402	0	402	447	0	359	0	0
Q(-17.03)ARM(+15.99)RGFQARKRYLRRRAALGQ(+.98)LNTILLVAQPLLQRRQ	910.151	0.01	5.21	12.7	12.55		Pyro-glu from Q; Oxidation (M); Deamidation (NQ)	792	0	0	0	0	0	0	1350	0	0	0	3870	0	0	0	2550	0	0	0	0	0	0	0	0	0	0	0	0	0	0	0	0	1400	0	0
HLKNVLLQFIFLKPGSERERLLPVI	987.277	0.02	2.33	9.7	9.99			0	0	0	412	900	3920	1220	0	0	0	0	0	2110	0	0	0	0	0	1130	0	0	0	0	972	0	0	1820	359	306	0	3720	0	0	0	2980
MAALSGGGGGGAEPGQAL	750.857	0.01	60	8.2	4			0	0	0	0	0	0	0	1130	0	0	857	0	1430	0	3070	0	2080	0	0	488	0	0	0	0	0	0	0	753	0	0	0	0	1140	0	0
QFGKK	607.361	0.06	60	6.6	10			694	0	0	0	0	0	0	2980	0	0	565	885	1140	1140	0	0	830	339	0	398	0	0	0	5280	566	0	0	0	0	683	799	0	1050	1930	1350
E(+42.01)GPWGIILESLAILGIVVTILLLLAFLFLMRKIQ(+.98)	959.836	0.02	4.42	5.9	6.24		Acetylation (Protein N-term); Deamidation (NQ)	0	0	0	0	0	487	1650	0	1920	0	0	1200	0	2350	0	0	973	0	1340	0	0	0	0	0	0	1760	986	0	1200	0	1800	0	2460	0	548
YVIVPLKT	932.574	0.16	2.71	7.8	8.59	sp|P01024|CO3_HUMAN		604	437	0	477	514	314	313	636	0	355	0	292	468	3010	20.7	323	432	389	2600	209	418	230	362	483	435	0	0	88.5	584	0	267	240	1550	94.3	0
Q(+42.01)VTVLQARGLRAKGPGG	584.01	0.03	60	5	12.01		Acetylation (Protein N-term)	0	0	0	0	0	0	1960	0	0	0	0	6630	0	0	0	0	0	0	0	0	0	0	0	0	0	0	0	0	0	0	0	0	0	0	0
LTKILHVFHGLLPGFLVK	678.088	0.01	5.21	4.4	10			0	0	0	0	0	7810	0	0	0	358	0	0	0	427	0	0	0	0	0	0	0	0	0	0	0	0	1510	0	0	0	0	0	0	0	0
FPGN(+.98)RGLMGQ(+.98)KGEIGPPGQQG	709.679	0.01	60	1.7	8.75	sp|Q96P44|COLA1_HUMAN	Deamidation (NQ)	1800	0	2440	0	585	0	1870	0	0	0	0	1920	0	0	0	0	0	0	0	0	0	0	0	0	0	4600	0	0	0	0	0	0	0	1420	0
RGIRLLD	842.515	0.01	60	9.3	9.6			0	0	1190	0	0	0	0	0	0	0	7430	0	0	0	0	0	0	0	0	78.2	0	0	0	0	0	0	0	0	0	0	0	7750	0	191	0
DDPDAPLQPVTPLQLFEG	976.481	0.09	60	6.6	3.37			1480	0	754	0	677	0	3080	0	0	0	0	0	0	1400	0	0	0	1250	1460	1320	9060	0	6480	12500	0	10500	2580	741	0	0	2770	1180	0	11700	0
KIITILVTAT	536.854	0.03	60	10	8.75			0	0	394	0	1560	0	0	0	0	0	0	0	4060	0	2640	0	0	0	0	0	0	0	507	0	0	0	0	1350	0	0	0	0	0	0	0
DSKGR	562.298	0.01	5.3	9.8	8.75			0	0	0	398	0	0	301	0	0	0	0	0	0	0	0	5010	2960	0	0	0	0	0	0	5960	0	0	1780	2150	0	0	0	0	0	0	0
EGSSETSSQ(+.98)SEESYFCGISACTSLCN(+.98)GQ	965.038	0.03	60	9.8	3.58		Deamidation (NQ)	0	0	811	0	0	0	0	0	0	0	0	3730	0	0	0	4140	0	0	0	0	3110	0	0	0	0	0	0	0	0	0	0	0	0	5720	0
HYLRLTIAI	1099.68	0.06	5.5	9.4	8.75			0	0	0	636	0	0	73.6	342	0	6780	0	421	0	0	192	237	0	0	0	6.55	134	0	0	97.5	967	184	67.9	0	0	261	0	0	361	0	509
VLGLSGN(+.98)LLLLMVLLRYVPRRRMVEIYLLNLAISNLLFLVTL	965.976	0.01	0.83	9.9	10.83		Deamidation (NQ)	0	0	0	3410	0	0	0	0	0	2410	0	0	0	0	0	2870	0	0	3040	0	0	1260	4320	0	0	0	0	0	0	0	0	2250	0	0	0
PPPPLLRLPLPPP	702.431	0.02	5.44	5.1	10.18			0	0	0	0	923	0	0	0	0	0	1430	0	0	4720	1630	0	0	0	0	0	0	0	0	0	0	0	0	0	0	0	1850	0	0	0	0
GYVQSLIRRVVNNVN(+.98)IVINNLILK	918.206	0.01	60	12.2	11		Deamidation (NQ)	0	3590	0	0	0	3640	0	0	0	1030	448	0	0	0	0	0	0	0	0	0	0	0	2480	0	292	0	0	0	0	963	0	0	3450	0	0
[truncated: 2,373 more rows]
